# Supplementary material
Source: publisher figshare collection journal article supplement (https://acs.figshare.com/ndownloader/files/4010020)
Supplement: Supplementary file 1 [file 4010020]

## Sheet: Nucl phosphopeptides
IPI	LOCUS	SEQUENCE	RATIO	TIME_COURSE	COMPONENT	ISOTOPE	DETERMINANT_FACTOR	REGRESSION_FACTOR	PVALUE	Xcorr	SAM_INT	REF_INT	AREA_RATIO	PROFILE_SCORE	FILE_NAME	SCAN	CS	ENRICHMENT	ASCORE_1	ASCORE_2	ASCORE_3	ASCORE_4	ASCORE_SEQUENCE
IPI00893658	2_Sep	K.IYHLPDAES#DEDEDFK.E	0.970874	3	N	H	0.81	0.66	6.22205e-09	3.5992	965999	1384935	0.7	0.72	HN3_1E1_MSA	7718	2	0.98	65.17	-	-	-	IYHLPDAES(p)DEDEDFK
IPI00014177	2_Sep	K.IYHLPDAES#DEDEDFK.E	0.787402	4	N	H	0.61	0.37	0.000144401	2.9621	1805859	2044191	0.88	0.76	HN4_1E1_MSA	6884	2	0.98	79.11	-	-	-	IYHLPDAES(p)DEDEDFK
IPI00893658	2_Sep	K.IYHLPDAES#DEDEDFK.E	0.787402	4	N	H	0.61	0.37	0.000144401	3.3449	1805859	2044191	0.88	0.76	HN4_1E1_MSA	6948	2	0.98	84.06	-	-	-	IYHLPDAES(p)DEDEDFK
IPI00893658	2_Sep	K.IYHLPDAES#DEDEDFK.E	1.17647	4	N	H	0.42	0.18	0.00208644	3.3309	3410887	3400666	1	0.96	HN4_1E1_LTQ	8919	2	0.98	59.13	-	-	-	IYHLPDAES(p)DEDEDFK
IPI00871851	2_Sep	K.IYHLPDAES#DEDEDFK^EQTR@.L	1.06383	0	N	H	0.82	0.68	0	3.5179	2430422	2411065	1.01	0.78	HN0_1E1_LTQ	7337	3	0.98	23.68	-	-	-	IYHLPDAES(p)DEDEDFK()EQTR()
IPI00893658	2_Sep	K.IYHLPDAES#DEDEDFKEQTR.L	0.952381	2	N	H	0.99	0.98	0	4.0244	13850754	14376351	0.96	0.95	HN2_1E1_LTQ	8179	3	0.98	28.67	-	-	-	IYHLPDAES(p)DEDEDFKEQTR
IPI00893658	2_Sep	K.IYHLPDAES#DEDEDFKEQTR.L	0.980392	2	N	H	0.99	0.99	0	3.574	10280700	10893881	0.94	0.93	HN2_1E1_MSA	7234	3	0.98	22.34	-	-	-	IYHLPDAES(p)DEDEDFKEQTR
IPI00893658	2_Sep	K.IYHLPDAES#DEDEDFKEQTR.L	1.28	2	N	L	0.99	0.97	0	4.4312	5399959	4715402	1.15	0.96	LN2_1E1_MSA	6962	3	0.98	23.26	-	-	-	IYHLPDAES(p)DEDEDFKEQTR
IPI00014177	2_Sep	K.IYHLPDAES#DEDEDFKEQTR.L	1.28	2	N	L	0.99	0.97	0	3.9124	5399959	4715402	1.15	0.96	LN2_1E1_MSA	7015	3	0.98	21.36	-	-	-	IYHLPDAES(p)DEDEDFKEQTR
IPI00893658	2_Sep	K.IYHLPDAES#DEDEDFKEQTR.L	1.33	2	N	L	0.98	0.96	0	3.7197	6585800	5658627	1.16	0.94	LN2_1E1_LTQ	7776	3	0.98	19.33	-	-	-	IYHLPDAES(p)DEDEDFKEQTR
IPI00893658	2_Sep	K.IYHLPDAES#DEDEDFK^EQTR@.L	0.609756	3	N	H	0.99	0.98	0	3.4778	18521427	11988865	1.54	0.98	HN3_1E1_MSA	7251	3	0.98	41.78	-	-	-	IYHLPDAES(p)DEDEDFK()EQTR()
IPI00014177	2_Sep	K.IYHLPDAES#DEDEDFK^EQTR@.L	0.632911	3	N	H	1	0.99	0	3.5223	29077809	19090481	1.52	0.98	HN3_1E1_LTQ	8961	3	0.98	36.47	-	-	-	IYHLPDAES(p)DEDEDFK()EQTR()
IPI00893658	2_Sep	K.IYHLPDAES#DEDEDFK^EQTR@.L	0.632911	3	N	H	1	0.99	0	3.5223	29077809	19090481	1.52	0.98	HN3_1E1_LTQ	8961	3	0.98	36.47	-	-	-	IYHLPDAES(p)DEDEDFK()EQTR()
IPI00893658	2_Sep	K.IYHLPDAES#DEDEDFKEQTR.L	0.609756	3	N	H	0.99	0.98	0	4.0921	18521427	11988865	1.54	0.98	HN3_1E1_MSA	7288	3	0.98	18.54	-	-	-	IYHLPDAES(p)DEDEDFKEQTR
IPI00893658	2_Sep	K.IYHLPDAES#DEDEDFKEQTR.L	0.625	3	N	H	0.97	0.93	0	3.3714	1806477	1189774	1.52	0.98	HN3_1E1_MSA	7307	2	0.98	57.82	-	-	-	IYHLPDAES(p)DEDEDFKEQTR
IPI00893658	2_Sep	K.IYHLPDAES#DEDEDFKEQTR.L	0.632911	3	N	H	1	0.99	0	3.7308	29077809	19090481	1.52	0.98	HN3_1E1_LTQ	9012	3	0.98	27.4	-	-	-	IYHLPDAES(p)DEDEDFKEQTR
IPI00014177	2_Sep	K.IYHLPDAES#DEDEDFKEQTR.L	0.787402	3	N	H	0.85	0.72	1.03162e-09	3.5705	2696510	2067496	1.3	0.93	HN3_1E1_LTQ	9183	3	0.98	17.62	-	-	-	IYHLPDAES(p)DEDEDFKEQTR
IPI00893658	2_Sep	K.IYHLPDAES#DEDEDFK^EQTR@.L	0.78	3	N	L	0.99	0.98	0	3.4594	8087525	10682189	0.76	0.97	LN3_1E1_MSA	7074	3	0.98	29.57	-	-	-	IYHLPDAES(p)DEDEDFK()EQTR()
IPI00893658	2_Sep	K.IYHLPDAES#DEDEDFK^EQTR@.L	0.8	3	N	L	0.99	0.99	0	3.0937	12410633	15874635	0.78	0.96	LN3_1E1_LTQ	8330	3	0.98	36.52	-	-	-	IYHLPDAES(p)DEDEDFK()EQTR()
IPI00893658	2_Sep	K.IYHLPDAES#DEDEDFKEQTR.L	0.78	3	N	L	0.99	0.98	0	3.1792	8087525	10682189	0.76	0.97	LN3_1E1_MSA	7061	3	0.98	11.03	-	-	-	IYHLPDAES(p)DEDEDFKEQTR
IPI00893658	2_Sep	K.IYHLPDAES#DEDEDFKEQTR.L	0.8	3	N	L	0.99	0.99	0	3.2076	12410633	15874635	0.78	0.96	LN3_1E1_LTQ	8253	3	0.98	24.21	-	-	-	IYHLPDAES(p)DEDEDFKEQTR
IPI00014177	2_Sep	K.IYHLPDAES#DEDEDFKEQTR.L	0.37594	4	N	H	0.99	0.98	0	3.9132	55256353	21680661	2.55	0.95	HN4_1E1_LTQ	8397	3	0.98	39.29	-	-	-	IYHLPDAES(p)DEDEDFKEQTR
IPI00893658	2_Sep	K.IYHLPDAES#DEDEDFKEQTR.L	0.37594	4	N	H	0.99	0.98	0	4.2405	55256353	21680661	2.55	0.95	HN4_1E1_LTQ	8512	3	0.98	23.88	-	-	-	IYHLPDAES(p)DEDEDFKEQTR
IPI00893658	2_Sep	K.IYHLPDAES#DEDEDFKEQTR.L	0.381679	4	N	H	0.99	0.99	0	3.7998	42819406	17387710	2.46	0.98	HN4_1E1_MSA	6490	3	0.98	15	-	-	-	IYHLPDAES(p)DEDEDFKEQTR
IPI00014177	2_Sep	K.IYHLPDAES#DEDEDFKEQTR.L	0.480769	4	N	H	0.89	0.79	2.20934e-14	3.7128	1568558	631835	2.48	0.94	HN4_1E1_MSA	6491	2	0.98	73.2	-	-	-	IYHLPDAES(p)DEDEDFKEQTR
IPI00893658	2_Sep	K.IYHLPDAES#DEDEDFKEQTR.L	0.480769	4	N	H	0.89	0.79	2.20934e-14	3.7128	1568558	631835	2.48	0.94	HN4_1E1_MSA	6491	2	0.98	73.2	-	-	-	IYHLPDAES(p)DEDEDFKEQTR
IPI00893658	2_Sep	K.IYHLPDAES#DEDEDFK^EQTR@.L	0.46	4	N	L	0.99	0.98	0	3.8403	5877935	13086830	0.45	0.95	LN4_1E1_LTQ	7638	3	0.98	45.2	-	-	-	IYHLPDAES(p)DEDEDFK()EQTR()
IPI00893658	2_Sep	K.IYHLPDAES#DEDEDFKEQTR.L	0.46	4	N	L	0.99	0.98	0	4.0926	5877935	13086830	0.45	0.95	LN4_1E1_LTQ	7689	3	0.98	30.24	-	-	-	IYHLPDAES(p)DEDEDFKEQTR
IPI00784614	9_Sep	R.S#FEVEEVETPNSTPPR.R	0.689655	0	N	H	0.95	0.91	0	3.2867	4843970	3274476	1.48	0.95	HN0_1E1_MSA	6365	2	0.98	75.69	-	-	-	S(p)FEVEEVETPNSTPPR
IPI00784936	9_Sep	R.S#FEVEEVETPNSTPPR.R	0.689655	0	N	H	0.96	0.91	0	4.0674	4414570	2962414	1.49	0.94	HN0_1E1_MSA	6399	2	0.98	79.28	-	-	-	S(p)FEVEEVETPNSTPPR
IPI00784936	9_Sep	R.S#FEVEEVETPNSTPPR.R	0.8	0	N	H	0.93	0.87	0	3.6015	3941598	2934923	1.34	0.95	HN0_1E1_LTQ	7532	2	0.98	90.56	-	-	-	S(p)FEVEEVETPNSTPPR
IPI00784614	9_Sep	R.S#FEVEEVETPNSTPPR.R	0.8	0	N	H	0.94	0.87	0	3.4276	3973530	2958872	1.34	0.95	HN0_1E1_LTQ	7595	2	0.98	69.66	-	-	-	S(p)FEVEEVETPNSTPPR
IPI00784614	9_Sep	R.S#FEVEEVETPNSTPPR@.R	0.689655	0	N	H	0.95	0.91	0	3.802	4843970	3274476	1.48	0.95	HN0_1E1_MSA	6339	2	0.98	99.84	-	-	-	S(p)FEVEEVETPNSTPPR()
IPI00784936	9_Sep	R.S#FEVEEVETPNSTPPR@.R	0.689655	0	N	H	0.95	0.91	0	3.802	4843970	3274476	1.48	0.95	HN0_1E1_MSA	6339	2	0.98	99.84	-	-	-	S(p)FEVEEVETPNSTPPR()
IPI00784614	9_Sep	R.S#FEVEEVETPNSTPPR@.R	0.8	0	N	H	0.93	0.87	0	3.7748	3941598	2934923	1.34	0.95	HN0_1E1_LTQ	7476	2	0.98	83.63	-	-	-	S(p)FEVEEVETPNSTPPR()
IPI00784936	9_Sep	R.S#FEVEEVETPNSTPPR@.R	0.8	0	N	H	0.93	0.87	0	3.7748	3941598	2934923	1.34	0.95	HN0_1E1_LTQ	7476	2	0.98	83.63	-	-	-	S(p)FEVEEVETPNSTPPR()
IPI00784936	9_Sep	R.S#FEVEEVETPNSTPPR.R	1.07527	2	N	H	0.99	0.98	0	3.9947	8526191	9212639	0.93	0.96	HN2_1E1_MSA	7315	2	0.98	94.41	-	-	-	S(p)FEVEEVETPNSTPPR
IPI00784614	9_Sep	R.S#FEVEEVETPNSTPPR.R	1.11111	2	N	H	0.99	0.97	0	4.19	11684046	12452486	0.94	0.97	HN2_1E1_LTQ	8520	2	0.98	74.26	-	-	-	S(p)FEVEEVETPNSTPPR
IPI00784936	9_Sep	R.S#FEVEEVETPNSTPPR.R	1.11111	2	N	H	0.99	0.97	0	4.19	11684046	12452486	0.94	0.97	HN2_1E1_LTQ	8520	2	0.98	74.26	-	-	-	S(p)FEVEEVETPNSTPPR
IPI00784936	9_Sep	R.S#FEVEEVETPNSTPPR@.R	1.07527	2	N	H	0.99	0.98	0	3.3006	8526191	9212639	0.93	0.96	HN2_1E1_MSA	7302	2	0.98	59.68	-	-	-	S(p)FEVEEVETPNSTPPR()
IPI00784936	9_Sep	R.S#FEVEEVETPNSTPPR@.R	1.11111	2	N	H	0.99	0.97	0	3.5971	11684046	12452486	0.94	0.97	HN2_1E1_LTQ	8360	2	0.98	84.62	-	-	-	S(p)FEVEEVETPNSTPPR()
IPI00784614	9_Sep	R.S#FEVEEVETPNSTPPR@.R	1.11111	2	N	H	0.99	0.97	0	3.5714	11684046	12452486	0.94	0.97	HN2_1E1_LTQ	8419	2	0.98	95.4	-	-	-	S(p)FEVEEVETPNSTPPR()
IPI00784808	9_Sep	R.S#FEVEEVETPNSTPPR.R	0.41	2	N	L	0.55	0.3	2.5992e-05	2.7373	293023	326457	0.9	0.9	LN2_1E6_MSA	4498	2	0.98	25.11	-	-	-	S(p)FEVEEVETPNSTPPR
IPI00784808	9_Sep	R.S#FEVEEVETPNSTPPR.R	1.29	2	N	L	0.98	0.97	0	4.0327	7410680	6047005	1.23	0.94	LN2_1E1_MSA	7242	2	0.98	79.94	-	-	-	S(p)FEVEEVETPNSTPPR
IPI00784614	9_Sep	R.S#FEVEEVETPNSTPPR.R	1.34	2	N	L	0.99	0.98	0	4.066	11149913	8683663	1.28	0.82	LN2_1E1_LTQ	8100	2	0.98	53.99	-	-	-	S(p)FEVEEVETPNSTPPR
IPI00784936	9_Sep	R.S#FEVEEVETPNSTPPR.R	1.34	2	N	L	0.99	0.98	0	4.066	11149913	8683663	1.28	0.82	LN2_1E1_LTQ	8100	2	0.98	53.99	-	-	-	S(p)FEVEEVETPNSTPPR
IPI00784808	9_Sep	R.S#FEVEEVETPNSTPPR@.R	1.29	2	N	L	0.98	0.97	0	3.8502	7258975	5903275	1.23	0.95	LN2_1E1_MSA	7114	2	0.98	91.54	-	-	-	S(p)FEVEEVETPNSTPPR()
IPI00784936	9_Sep	R.S#FEVEEVETPNSTPPR@.R	1.35	2	N	L	0.99	0.98	0	3.7659	9980788	7716145	1.29	0.97	LN2_1E1_LTQ	7858	2	0.98	99.02	-	-	-	S(p)FEVEEVETPNSTPPR()
IPI00784614	9_Sep	R.S#FEVEEVETPNSTPPR@.R	1.35	2	N	L	0.99	0.98	0	3.5998	9980788	7716145	1.29	0.97	LN2_1E1_LTQ	7922	2	0.98	96.54	-	-	-	S(p)FEVEEVETPNSTPPR()
IPI00784936	9_Sep	R.S#FEVEEVETPNSTPPR.R	0.613497	3	N	H	0.99	0.97	0	4.3529	13873065	9072425	1.53	0.96	HN3_1E1_LTQ	9144	2	0.98	99.09	-	-	-	S(p)FEVEEVETPNSTPPR
IPI00784614	9_Sep	R.S#FEVEEVETPNSTPPR.R	0.613497	3	N	H	0.99	0.97	0	3.0032	13873065	9072425	1.53	0.96	HN3_1E1_LTQ	9297	2	0.98	50.21	-	-	-	S(p)FEVEEVETPNSTPPR
IPI00784936	9_Sep	R.S#FEVEEVETPNSTPPR.R	0.636943	3	N	H	0.99	0.98	0	3.7372	10444397	6771823	1.54	0.97	HN3_1E1_MSA	7477	2	0.98	101.87	-	-	-	S(p)FEVEEVETPNSTPPR
IPI00784614	9_Sep	R.S#FEVEEVETPNSTPPR@.R	0.613497	3	N	H	0.99	0.97	0	3.5324	13873065	9072425	1.53	0.96	HN3_1E1_LTQ	9123	2	0.98	95.16	-	-	-	S(p)FEVEEVETPNSTPPR()
IPI00784936	9_Sep	R.S#FEVEEVETPNSTPPR@.R	0.613497	3	N	H	0.99	0.97	0	4.0029	13873065	9072425	1.53	0.96	HN3_1E1_LTQ	9195	2	0.98	104.7	-	-	-	S(p)FEVEEVETPNSTPPR()
IPI00784936	9_Sep	R.S#FEVEEVETPNSTPPR@.R	0.636943	3	N	H	0.99	0.98	0	3.4142	10444397	6771823	1.54	0.97	HN3_1E1_MSA	7489	2	0.98	83.07	-	-	-	S(p)FEVEEVETPNSTPPR()
IPI00784808	9_Sep	R.S#FEVEEVETPNSTPPR.R	0.76	3	N	L	0.99	0.98	0	4.6781	8059525	10532345	0.77	0.97	LN3_1E1_LTQ	8352	2	0.98	83.17	-	-	-	S(p)FEVEEVETPNSTPPR
IPI00784614	9_Sep	R.S#FEVEEVETPNSTPPR.R	0.79	3	N	L	0.99	0.99	0	4.2193	4280239	5530587	0.77	0.99	LN3_1E1_MSA	7238	2	0.98	89.18	-	-	-	S(p)FEVEEVETPNSTPPR
IPI00784936	9_Sep	R.S#FEVEEVETPNSTPPR.R	0.79	3	N	L	0.99	0.99	0	4.2193	4280239	5530587	0.77	0.99	LN3_1E1_MSA	7238	2	0.98	89.18	-	-	-	S(p)FEVEEVETPNSTPPR
IPI00784808	9_Sep	R.S#FEVEEVETPNSTPPR@.R	0.76	3	N	L	0.99	0.98	0	3.8937	8059525	10532345	0.77	0.97	LN3_1E1_LTQ	8299	2	0.98	87.25	-	-	-	S(p)FEVEEVETPNSTPPR()
IPI00784936	9_Sep	R.S#FEVEEVETPNSTPPR@.R	0.79	3	N	L	0.99	0.99	0	3.7898	4280239	5530587	0.77	0.99	LN3_1E1_MSA	7141	2	0.98	88.19	-	-	-	S(p)FEVEEVETPNSTPPR()
IPI00784614	9_Sep	R.S#FEVEEVETPNSTPPR@.R	0.79	3	N	L	0.99	0.99	0	3.4164	4280239	5530587	0.77	0.99	LN3_1E1_MSA	7255	2	0.98	77.5	-	-	-	S(p)FEVEEVETPNSTPPR()
IPI00784808	9_Sep	R.S#FEVEEVETPNSTPPR.R	0.302115	4	N	H	0.98	0.96	0	4.4557	21592069	6796516	3.18	0.99	HN4_1E1_LTQ	8611	2	0.98	94.24	-	-	-	S(p)FEVEEVETPNSTPPR
IPI00784808	9_Sep	R.S#FEVEEVETPNSTPPR.R	0.311526	4	N	H	0.99	0.99	0	4.6866	18242585	6174787	2.95	0.98	HN4_1E1_MSA	6657	2	0.98	84.57	-	-	-	S(p)FEVEEVETPNSTPPR
IPI00784936	9_Sep	R.S#FEVEEVETPNSTPPR.R	2.17391	4	N	H	0.42	0.18	0.00908455	2.9237	350752	237101	1.48	0.72	HN4_1E2_LTQ	5508	2	0.98	56	-	-	-	S(p)FEVEEVETPNSTPPR
IPI00784936	9_Sep	R.S#FEVEEVETPNSTPPR.R	0.36	4	N	L	0.98	0.96	0	4.0081	3268467	8723007	0.37	0.97	LN4_1E1_LTQ	7746	2	0.98	71.8	-	-	-	S(p)FEVEEVETPNSTPPR
IPI00784614	9_Sep	R.S#FEVEEVETPNSTPPR.R	0.37	4	N	L	0.99	0.97	0	4.2241	2369791	6311159	0.38	0.98	LN4_1E1_MSA	6588	2	0.98	83.47	-	-	-	S(p)FEVEEVETPNSTPPR
IPI00784936	9_Sep	R.S#FEVEEVETPNSTPPR.R	0.37	4	N	L	0.99	0.97	0	4.2241	2369791	6311159	0.38	0.98	LN4_1E1_MSA	6588	2	0.98	83.47	-	-	-	S(p)FEVEEVETPNSTPPR
IPI00784936	9_Sep	R.S#FEVEEVETPNSTPPR@.R	0.36	4	N	L	0.98	0.96	0	3.8576	3268467	8723007	0.37	0.97	LN4_1E1_LTQ	7717	2	0.98	74.32	-	-	-	S(p)FEVEEVETPNSTPPR()
IPI00784808	9_Sep	R.S#FEVEEVETPNSTPPR@.R	0.36	4	N	L	0.61	0.37	0.00133898	3.0596	76711	187924	0.41	0.7	LN4_1E2_MSA	5159	2	0.98	54.92	-	-	-	S(p)FEVEEVETPNSTPPR()
IPI00784614	9_Sep	R.S#FEVEEVETPNSTPPR@.R	0.37	4	N	L	0.99	0.97	0	3.5379	2369791	6311159	0.38	0.98	LN4_1E1_MSA	6609	2	0.98	93.5	-	-	-	S(p)FEVEEVETPNSTPPR()
IPI00784936	9_Sep	R.S#FEVEEVETPNSTPPR@.R	0.37	4	N	L	0.99	0.97	0	3.8325	2369791	6311159	0.38	0.98	LN4_1E1_MSA	6661	2	0.98	68.75	-	-	-	S(p)FEVEEVETPNSTPPR()
IPI00784808	9_Sep	R.S#FEVEEVETPNSTPPR.R	0.232558	5	N	H	0.97	0.94	0	4.3622	11843554	2861326	4.14	0.98	HN5_1E1_MSA	5382	2	0.98	90.55	-	-	-	S(p)FEVEEVETPNSTPPR
IPI00784936	9_Sep	R.S#FEVEEVETPNSTPPR.R	0.255754	5	N	H	0.96	0.92	0	4.2592	13419614	3240355	4.14	0.94	HN5_1E1_LTQ	5892	2	0.98	96.29	-	-	-	S(p)FEVEEVETPNSTPPR
IPI00784808	9_Sep	R.S#FEVEEVETPNSTPPR@.R	0.232558	5	N	H	0.97	0.94	0	4.4187	11843554	2861326	4.14	0.98	HN5_1E1_MSA	5411	2	0.98	71.23	-	-	-	S(p)FEVEEVETPNSTPPR()
IPI00784936	9_Sep	R.S#FEVEEVETPNSTPPR@.R	0.255754	5	N	H	0.96	0.92	0	3.9483	13419614	3240355	4.14	0.94	HN5_1E1_LTQ	5846	2	0.98	94.21	-	-	-	S(p)FEVEEVETPNSTPPR()
IPI00784614	9_Sep	R.S#FEVEEVETPNSTPPR.R	0.33	5	N	L	0.97	0.95	0	3.8743	3504940	9641686	0.36	0.97	LN5_1E1_MSA	5356	2	0.98	76.78	-	-	-	S(p)FEVEEVETPNSTPPR
IPI00784936	9_Sep	R.S#FEVEEVETPNSTPPR.R	0.33	5	N	L	0.97	0.95	0	3.8743	3504940	9641686	0.36	0.97	LN5_1E1_MSA	5356	2	0.98	76.78	-	-	-	S(p)FEVEEVETPNSTPPR
IPI00784614	9_Sep	R.S#FEVEEVETPNSTPPR.R	0.36	5	N	L	0.98	0.95	0	4.3856	4708699	13180822	0.36	0.96	LN5_1E1_LTQ	5886	2	0.98	88.51	-	-	-	S(p)FEVEEVETPNSTPPR
IPI00784936	9_Sep	R.S#FEVEEVETPNSTPPR.R	0.36	5	N	L	0.98	0.95	0	4.3856	4708699	13180822	0.36	0.96	LN5_1E1_LTQ	5886	2	0.98	88.51	-	-	-	S(p)FEVEEVETPNSTPPR
IPI00784614	9_Sep	R.S#FEVEEVETPNSTPPR@.R	0.33	5	N	L	0.97	0.95	0	3.1358	3504940	9641686	0.36	0.97	LN5_1E1_MSA	5279	2	0.98	52.08	-	-	-	S(p)FEVEEVETPNSTPPR()
IPI00784936	9_Sep	R.S#FEVEEVETPNSTPPR@.R	0.33	5	N	L	0.97	0.95	0	3.7149	3504940	9641686	0.36	0.97	LN5_1E1_MSA	5326	2	0.98	101.51	-	-	-	S(p)FEVEEVETPNSTPPR()
IPI00784936	9_Sep	R.S#FEVEEVETPNSTPPR@.R	0.35	5	N	L	0.98	0.96	0	4.185	5320355	14797950	0.36	0.94	LN5_1E1_LTQ	5970	2	0.98	80.03	-	-	-	S(p)FEVEEVETPNSTPPR()
IPI00784614	9_Sep	R.S#FEVEEVETPNSTPPR@.R	0.35	5	N	L	0.98	0.95	0	3.9016	5719524	15958466	0.36	0.83	LN5_1E1_LTQ	6041	2	0.98	74.68	-	-	-	S(p)FEVEEVETPNSTPPR()
IPI00302238	AATF	R.AGDR@NS#EDDGVVM*TF.S	1.21951	2	N	H	0.95	0.9	0	2.5069	1405396	1648569	0.85	0.96	HN2_1E1_LTQ	7541	2	0.98	73.15	-	-	-	AGDR()NS(p)EDDGVVM()TF
IPI00302238	AATF	R.AGDRNS#EDDGVVM*TF.S	1.21951	2	N	H	0.97	0.94	0	2.7365	740355	884597	0.84	0.96	HN2_1E1_MSA	6648	2	0.98	82.98	-	-	-	AGDRNS(p)EDDGVVM()TF
IPI00302238	AATF	R.AGDRNS#EDDGVVM*TF.S	1.45	2	N	L	0.98	0.97	0	2.7518	773963	532754	1.45	0.98	LN2_1E1_MSA	6421	2	0.98	95.35	-	-	-	AGDRNS(p)EDDGVVM()TF
IPI00302238	AATF	R.AGDR@NS#EDDGVVM*TF.S	0.813008	3	N	H	0.99	0.97	0	2.5305	2254932	1981017	1.14	0.99	HN3_1E1_LTQ	8211	2	0.98	80.27	-	-	-	AGDR()NS(p)EDDGVVM()TF
IPI00302238	AATF	R.AGDR@NS#EDDGVVM*TF.S	0.862069	3	N	H	0.97	0.94	0	2.5222	1266662	1146787	1.1	0.97	HN3_1E1_MSA	6589	2	0.98	82.53	-	-	-	AGDR()NS(p)EDDGVVM()TF
IPI00302238	AATF	R.AGDRNS#EDDGVVM*TF.S	0.813008	3	N	H	0.99	0.97	0	2.5804	2254932	1981017	1.14	0.99	HN3_1E1_LTQ	8246	2	0.98	75.62	-	-	-	AGDRNS(p)EDDGVVM()TF
IPI00302238	AATF	R.AGDRNS#EDDGVVM*TF.S	0.862069	3	N	H	0.97	0.94	0	2.583	1266662	1146787	1.1	0.97	HN3_1E1_MSA	6609	2	0.98	81.21	-	-	-	AGDRNS(p)EDDGVVM()TF
IPI00302238	AATF	R.AGDR@NS#EDDGVVM*TF.S	1.03	3	N	L	0.97	0.95	0	2.8477	1198038	1130900	1.06	0.97	LN3_1E1_LTQ	7533	2	0.98	77.51	-	-	-	AGDR()NS(p)EDDGVVM()TF
IPI00302238	AATF	R.AGDRNS#EDDGVVM*TF.S	0.456621	4	N	H	0.98	0.96	0	2.7976	1571600	745339	2.11	0.98	HN4_1E1_MSA	5937	2	0.98	90.06	-	-	-	AGDRNS(p)EDDGVVM()TF
IPI00302238	AATF	R.AGDRNS#EDDGVVM*TF.S	0.473934	4	N	H	0.95	0.91	0	2.6979	2804148	1398811	2	0.99	HN4_1E1_LTQ	7786	2	0.98	74.16	-	-	-	AGDRNS(p)EDDGVVM()TF
IPI00302238	AATF	R.AGDR@NS#EDDGVVM*TF.S	0.49	4	N	L	0.97	0.93	0	2.8188	497784	916287	0.54	0.98	LN4_1E1_MSA	5897	2	0.98	87.25	-	-	-	AGDR()NS(p)EDDGVVM()TF
IPI00302238	AATF	R.AGDRNS#EDDGVVM*TF.S	0.51	4	N	L	0.97	0.93	0	2.5747	692526	1266789	0.55	0.98	LN4_1E1_LTQ	7039	2	0.98	61.1	-	-	-	AGDRNS(p)EDDGVVM()TF
IPI00302238	AATF	R.AGDR@NS#EDDGVVM*TF.S	0.42	5	N	L	0.78	0.6	6.88423e-09	2.7973	100199	212588	0.47	0.93	LN5_3E1_LTQ	3556	2	0.98	75.04	-	-	-	AGDR()NS(p)EDDGVVM()TF
IPI00302238	AATF	R.AGDRNS#EDDGVVM*TFSSVK.V	1.38889	4	N	H	0.78	0.62	3.03091e-14	2.5111	2409252	3345249	0.72	0.79	HN4_1E1_LTQ	8265	2	0.98	21.46	-	-	-	AGDRNS(p)EDDGVVM()TFSSVK
IPI00302238	AATF	R.AGDR@NS#EDDGVVMTF.S	1.17647	2	N	H	0.95	0.9	0	2.7924	2303735	2555756	0.9	0.96	HN2_1E1_MSA	8276	2	0.98	88.89	-	-	-	AGDR()NS(p)EDDGVVMTF
IPI00302238	AATF	R.AGDRNS#EDDGVVMTF.S	1.17647	2	N	H	0.95	0.9	0	2.5007	2303735	2555756	0.9	0.96	HN2_1E1_MSA	8231	2	0.98	57.25	-	-	-	AGDRNS(p)EDDGVVMTF
IPI00302238	AATF	R.AGDR@NS#EDDGVVMTF.S	1.32	2	N	L	0.95	0.9	0	2.6647	2709753	1997486	1.36	0.98	LN2_1E1_LTQ	8871	2	0.98	75.99	-	-	-	AGDR()NS(p)EDDGVVMTF
IPI00302238	AATF	R.AGDR@NS#EDDGVVMTF.S	0.970874	3	N	H	0.95	0.89	0	2.5206	1948186	1791302	1.09	0.95	HN3_1E1_LTQ	10389	2	0.98	59.08	-	-	-	AGDR()NS(p)EDDGVVMTF
IPI00302238	AATF	R.AGDR@NS#EDDGVVMTF.S	0.8	3	N	L	0.94	0.88	0	3.1633	1490133	1612195	0.92	0.95	LN3_1E1_MSA	8140	2	0.98	84.31	-	-	-	AGDR()NS(p)EDDGVVMTF
IPI00302238	AATF	R.AGDR@NS#EDDGVVMTF.S	0.95	3	N	L	0.88	0.78	5.55112e-16	2.579	1915862	1842757	1.04	0.95	LN3_1E1_LTQ	9506	2	0.98	73.81	-	-	-	AGDR()NS(p)EDDGVVMTF
IPI00302238	AATF	R.AGDRNS#EDDGVVMTF.S	0.507614	4	N	H	0.97	0.94	0	2.6027	5035431	2559945	1.97	0.98	HN4_1E1_MSA	7676	2	0.98	50.85	-	-	-	AGDRNS(p)EDDGVVMTF
IPI00302238	AATF	R.AGDRNS#EDDGVVMTF.S	0.512821	4	N	H	0.92	0.85	0	2.5131	5879588	2818894	2.09	0.98	HN4_1E1_LTQ	9725	2	0.98	89.25	-	-	-	AGDRNS(p)EDDGVVMTF
IPI00302238	AATF	R.AGDR@NS#EDDGVVMTF.S	0.37	4	N	L	0.72	0.52	3.55827e-07	3.0636	641026	1195694	0.54	0.89	LN4_1E1_LTQ	8725	2	0.98	92.66	-	-	-	AGDR()NS(p)EDDGVVMTF
IPI00302238	AATF	R.AGDR@NS#EDDGVVMTFSSVK^.V	1.23457	2	N	H	0.92	0.85	1.11022e-16	2.6517	1778734	2306467	0.77	0.95	HN2_1E1_LTQ	8971	2	0.98	42.24	-	-	-	AGDR()NS(p)EDDGVVMTFSSVK()
IPI00302238	AATF	R.AGDRNS#EDDGVVMTFSSVK.V	1.23457	2	N	H	0.92	0.85	1.11022e-16	3.3577	1778734	2306467	0.77	0.95	HN2_1E1_LTQ	8993	2	0.98	81.66	-	-	-	AGDRNS(p)EDDGVVMTFSSVK
IPI00302238	AATF	R.AGDRNS#EDDGVVMTFSSVK.V	1.26582	2	N	H	0.94	0.88	0	2.5215	1777453	2185827	0.81	0.94	HN2_1E1_MSA	7812	2	0.98	40.5	-	-	-	AGDRNS(p)EDDGVVMTFSSVK
IPI00302238	AATF	R.AGDRNS#EDDGVVMTFSSVK.V	0.980392	3	N	H	0.92	0.84	2.22045e-14	3.7131	1818693	1665593	1.09	0.93	HN3_1E1_MSA	7958	2	0.98	94.99	-	-	-	AGDRNS(p)EDDGVVMTFSSVK
IPI00302238	AATF	R.AGDR@NS#EDDGVVMTFSSVK^.V	0.78	3	N	L	0.82	0.67	7.80238e-09	2.7384	1160061	1194719	0.97	0.89	LN3_1E1_LTQ	8993	2	0.98	39.59	-	-	-	AGDR()NS(p)EDDGVVMTFSSVK()
IPI00302238	AATF	R.AGDRNS#EDDGVVMTFSSVK.V	0.86	3	N	L	0.85	0.72	4.21886e-09	2.9906	1324538	1212706	1.09	0.93	LN3_1E1_MSA	7770	2	0.98	44.16	-	-	-	AGDRNS(p)EDDGVVMTFSSVK
IPI00302238	AATF	R.AGDRNS#EDDGVVMTFSSVK.V	0.961538	4	N	H	0.96	0.92	0	4.4254	4142828	3792710	1.09	0.98	HN4_1E1_MSA	7143	2	0.98	93.39	-	-	-	AGDRNS(p)EDDGVVMTFSSVK
IPI00302238	AATF	R.AGDRNS#EDDGVVMTFSSVK.V	0.980392	4	N	H	0.96	0.92	0	3.0299	5247383	4791829	1.1	0.98	HN4_1E1_LTQ	9291	2	0.98	50.53	-	-	-	AGDRNS(p)EDDGVVMTFSSVK
IPI00873899	ABCF1	K.AEQGS#EEEGEGEEEEEEGGESK.A	0.806452	0	N	H	1	0.99	0	3.673	1060311	867679	1.22	0.99	HN0_1E1_MSA	3866	2	0.98	151.64	-	-	-	AEQGS(p)EEEGEGEEEEEEGGESK
IPI00873899	ABCF1	K.AEQGS#EEEGEGEEEEEEGGESK.A	0.826446	0	N	H	0.99	0.97	0	2.8789	1038507	799024	1.3	0.99	HN0_1E1_LTQ	3934	2	0.98	109.89	-	-	-	AEQGS(p)EEEGEGEEEEEEGGESK
IPI00873899	ABCF1	K.AEQGS#EEEGEGEEEEEEGGESK^.A	0.806452	0	N	H	1	0.99	0	3.3212	1060311	867679	1.22	0.99	HN0_1E1_MSA	3850	2	0.98	139.18	-	-	-	AEQGS(p)EEEGEGEEEEEEGGESK()
IPI00873899	ABCF1	K.AEQGS#EEEGEGEEEEEEGGESK^.A	0.826446	0	N	H	0.99	0.97	0	2.9727	1038507	799024	1.3	0.99	HN0_1E1_LTQ	3976	2	0.98	123.08	-	-	-	AEQGS(p)EEEGEGEEEEEEGGESK()
IPI00873899	ABCF1	K.AEQGS#EEEGEGEEEEEEGGESK.A	0.884956	2	N	H	0.99	0.99	7.66054e-15	4.3207	592256	555150	1.07	0.96	HN2_1E1_MSA	4337	2	0.98	188.74	-	-	-	AEQGS(p)EEEGEGEEEEEEGGESK
IPI00873899	ABCF1	K.AEQGS#EEEGEGEEEEEEGGESK^.A	0.884956	2	N	H	0.99	0.99	7.66054e-15	4.473	592256	555150	1.07	0.96	HN2_1E1_MSA	4304	2	0.98	160.98	-	-	-	AEQGS(p)EEEGEGEEEEEEGGESK()
IPI00873899	ABCF1	K.AEQGS#EEEGEGEEEEEEGGESK^.A	0.917431	2	N	H	0.99	0.99	0	3.6944	2020763	1879611	1.08	1	HN2_1E1_LTQ	4533	2	0.98	172.16	-	-	-	AEQGS(p)EEEGEGEEEEEEGGESK()
IPI00873899	ABCF1	K.AEQGS#EEEGEGEEEEEEGGESK.A	1.31	2	N	L	1	0.99	0	3.6093	827361	651752	1.27	1	LN2_1E1_MSA	4083	2	0.98	120.58	-	-	-	AEQGS(p)EEEGEGEEEEEEGGESK
IPI00873899	ABCF1	K.AEQGS#EEEGEGEEEEEEGGESK.A	1.42	2	N	L	0.99	0.98	0	3.54	1069195	783066	1.37	0.99	LN2_1E1_LTQ	4250	2	0.98	121.37	-	-	-	AEQGS(p)EEEGEGEEEEEEGGESK
IPI00873899	ABCF1	K.AEQGS#EEEGEGEEEEEEGGESK^.A	1.31	2	N	L	1	0.99	0	3.9535	827361	651752	1.27	1	LN2_1E1_MSA	4105	2	0.98	123.9	-	-	-	AEQGS(p)EEEGEGEEEEEEGGESK()
IPI00873899	ABCF1	K.AEQGS#EEEGEGEEEEEEGGESK^.A	1.42	2	N	L	0.99	0.98	0	3.6178	1069195	783066	1.37	0.99	LN2_1E1_LTQ	4240	2	0.98	163.14	-	-	-	AEQGS(p)EEEGEGEEEEEEGGESK()
IPI00873899	ABCF1	K.AEQGS#EEEGEGEEEEEEGGESK.A	0.909091	3	N	H	1	1	0	3.9566	2807595	2497857	1.12	1	HN3_1E1_LTQ	5045	2	0.98	159.42	-	-	-	AEQGS(p)EEEGEGEEEEEEGGESK
IPI00873899	ABCF1	K.AEQGS#EEEGEGEEEEEEGGESK^.A	0.970874	3	N	H	1	0.99	8.65974e-15	4.0238	1841120	1791247	1.03	1	HN3_1E1_MSA	4198	2	0.98	182.69	-	-	-	AEQGS(p)EEEGEGEEEEEEGGESK()
IPI00873899	ABCF1	K.AEQGS#EEEGEGEEEEEEGGESK.A	1.27	3	N	L	1	0.99	0	3.2037	1609224	1282485	1.25	1	LN3_1E1_LTQ	4601	2	0.98	157.1	-	-	-	AEQGS(p)EEEGEGEEEEEEGGESK
IPI00873899	ABCF1	K.AEQGS#EEEGEGEEEEEEGGESK^.A	1.25	3	N	L	0.96	0.91	1.15874e-12	3.1259	301457	252790	1.19	0.99	LN3_1E1_LTQ	4644	3	0.98	38.37	-	-	-	AEQGS(p)EEEGEGEEEEEEGGESK()
IPI00873899	ABCF1	K.AEQGS#EEEGEGEEEEEEGGESK.A	0.406504	4	N	H	1	1	0	3.9133	5126915	2108749	2.43	1	HN4_1E1_LTQ	5241	2	0.98	161.41	-	-	-	AEQGS(p)EEEGEGEEEEEEGGESK
IPI00873899	ABCF1	K.AEQGS#EEEGEGEEEEEEGGESK.A	0.41841	4	N	H	0.99	0.99	0	4.6075	4136268	1734276	2.39	0.95	HN4_1E1_MSA	1797	2	0.98	153.73	-	-	-	AEQGS(p)EEEGEGEEEEEEGGESK
IPI00873899	ABCF1	K.AEQGS#EEEGEGEEEEEEGGESK.A	0.5	4	N	L	0.98	0.97	4.44089e-16	3.2115	501543	1007869	0.5	0.99	LN4_1E1_MSA	3687	2	0.98	132.92	-	-	-	AEQGS(p)EEEGEGEEEEEEGGESK
IPI00873899	ABCF1	K.AEQGS#EEEGEGEEEEEEGGESK.A	0.51	4	N	L	1	0.99	0	2.8797	750507	1459926	0.51	0.99	LN4_1E1_LTQ	4282	2	0.98	106.99	-	-	-	AEQGS(p)EEEGEGEEEEEEGGESK
IPI00873899	ABCF1	K.AEQGS#EEEGEGEEEEEEGGESK^.A	0.51	4	N	L	1	0.99	0	3.9412	750507	1459926	0.51	0.99	LN4_1E1_LTQ	4232	2	0.98	153.34	-	-	-	AEQGS(p)EEEGEGEEEEEEGGESK()
IPI00873899	ABCF1	K.AEQGS#EEEGEGEEEEEEGGESK.A	0.330033	5	N	H	0.99	0.99	0	4.5251	3425569	1126615	3.04	1	HN5_1E1_MSA	2389	2	0.98	183.11	-	-	-	AEQGS(p)EEEGEGEEEEEEGGESK
IPI00873899	ABCF1	K.AEQGS#EEEGEGEEEEEEGGESK.A	0.337838	5	N	H	0.97	0.95	0	3.8402	4494296	1489759	3.02	0.99	HN5_1E1_LTQ	2526	2	0.98	147.52	-	-	-	AEQGS(p)EEEGEGEEEEEEGGESK
IPI00873899	ABCF1	K.AEQGS#EEEGEGEEEEEEGGESK^.A	0.330033	5	N	H	0.99	0.99	0	4.1734	3425569	1126615	3.04	1	HN5_1E1_MSA	2392	2	0.98	132.75	-	-	-	AEQGS(p)EEEGEGEEEEEEGGESK()
IPI00873899	ABCF1	K.AEQGS#EEEGEGEEEEEEGGESK^.A	0.337838	5	N	H	0.97	0.95	0	2.7164	4494296	1489759	3.02	0.99	HN5_1E1_LTQ	2558	2	0.98	133.95	-	-	-	AEQGS(p)EEEGEGEEEEEEGGESK()
IPI00873899	ABCF1	K.AEQGS#EEEGEGEEEEEEGGESK.A	0.44	5	N	L	1	0.99	0	3.6545	2234889	4887154	0.46	0.98	LN5_1E1_LTQ	2573	2	0.98	125.86	-	-	-	AEQGS(p)EEEGEGEEEEEEGGESK
IPI00873899	ABCF1	K.AEQGS#EEEGEGEEEEEEGGESK.A	0.47	5	N	L	0.99	0.99	0	4.3924	1823232	3753144	0.49	0.98	LN5_1E1_MSA	2446	2	0.98	179.49	-	-	-	AEQGS(p)EEEGEGEEEEEEGGESK
IPI00873899	ABCF1	K.KAEQGS#EEEGEGEEEEEEGGESK.A	1.0101	2	N	H	0.98	0.97	1.06393e-11	5.0542	480398	489337	0.98	0.98	HN2_1E1_MSA	4163	3	0.98	142.05	-	-	-	KAEQGS(p)EEEGEGEEEEEEGGESK
IPI00873899	ABCF1	K.K^AEQGS#EEEGEGEEEEEEGGESK^.A	1.34	2	N	L	0.99	0.98	3.10862e-15	5.6468	815616	627064	1.3	0.99	LN2_1E1_LTQ	4079	3	0.98	158.46	-	-	-	K()AEQGS(p)EEEGEGEEEEEEGGESK()
IPI00873899	ABCF1	K.KAEQGS#EEEGEGEEEEEEGGESK.A	1.7	2	N	L	0.94	0.89	9.46798e-13	5.1763	414667	221596	1.87	0.97	LN2_1E6_MSA	2046	3	0.98	96.37	-	-	-	KAEQGS(p)EEEGEGEEEEEEGGESK
IPI00873899	ABCF1	K.KAEQGS#EEEGEGEEEEEEGGESK.A	2.21	2	N	L	0.96	0.92	2.60347e-13	5.1434	347597	153550	2.26	0.99	LN2_1E6_LTQ	1940	3	0.98	89.87	-	-	-	KAEQGS(p)EEEGEGEEEEEEGGESK
IPI00873899	ABCF1	K.K^AEQGS#EEEGEGEEEEEEGGESK^.A	0.925926	3	N	H	0.99	0.98	4.44089e-16	3.8873	2060872	1893602	1.09	0.99	HN3_1E1_LTQ	4907	3	0.98	114.3	-	-	-	K()AEQGS(p)EEEGEGEEEEEEGGESK()
IPI00873899	ABCF1	K.KAEQGS#EEEGEGEEEEEEGGESK.A	0.952381	3	N	H	1	1	0	3.5357	1090139	1085273	1	1	HN3_1E1_MSA	4105	3	0.98	54.62	-	-	-	KAEQGS(p)EEEGEGEEEEEEGGESK
IPI00873899	ABCF1	K.KAEQGS#EEEGEGEEEEEEGGESK.A	1.3	3	N	L	1	0.99	0	5.7742	1695734	1320107	1.28	0.99	LN3_1E1_LTQ	4479	3	0.98	149.26	-	-	-	KAEQGS(p)EEEGEGEEEEEEGGESK
IPI00873899	ABCF1	K.KAEQGS#EEEGEGEEEEEEGGESK.A	0.4	4	N	H	0.98	0.96	0	5.9281	1469143	578078	2.54	0.99	HN4_1E1_MSA	1394	3	0.98	162.33	-	-	-	KAEQGS(p)EEEGEGEEEEEEGGESK
IPI00873899	ABCF1	K.KAEQGS#EEEGEGEEEEEEGGESK.A	0.431034	4	N	H	0.94	0.88	6.44868e-08	3.6447	472389	178202	2.65	0.98	HN4_1E1_LTQ	5264	3	0.98	37.65	-	-	-	KAEQGS(p)EEEGEGEEEEEEGGESK
IPI00873899	ABCF1	K.K^AEQGS#EEEGEGEEEEEEGGESK^.A	0.53	4	N	L	0.98	0.96	5.74901e-09	5.6579	809743	1436693	0.56	0.99	LN4_1E1_MSA	3559	3	0.98	169	-	-	-	K()AEQGS(p)EEEGEGEEEEEEGGESK()
IPI00873899	ABCF1	K.KAEQGS#EEEGEGEEEEEEGGESK.A	0.53	4	N	L	0.98	0.96	5.74901e-09	5.2063	809743	1436693	0.56	0.99	LN4_1E1_MSA	3551	3	0.98	115.75	-	-	-	KAEQGS(p)EEEGEGEEEEEEGGESK
IPI00873899	ABCF1	K.LS#VPTSDEEDEVPAPK^PR@.G	1.40845	2	N	H	0.99	0.99	0	2.6927	10658009	14784282	0.72	0.99	HN2_1E1_LTQ	7359	2	0.98	9.5	-	-	-	LS(p)VPTSDEEDEVPAPK()PR()
IPI00873899	ABCF1	K.LSVPTS#DEEDEVPAPK.P	0.49	4	N	L	0.81	0.66	4.36184e-09	2.5911	843010	1229601	0.69	0.76	LN4_1E1_LTQ	7216	2	0.98	0	-	-	-	LSVPTS(p)DEEDEVPAPK
IPI00873899	ABCF1	K.LSVPTS#DEEDEVPAPK^PR@.G	1.55	2	N	L	1	0.99	0	2.9959	9271641	5892126	1.57	0.99	LN2_1E1_MSA	6203	2	0.98	19.85	-	-	-	LSVPTS(p)DEEDEVPAPK()PR()
IPI00843911	ACD	R.ELILGSETPSS#PR.A	0.73	2	N	L	0.73	0.53	7.03517e-07	2.7569	445205	438270	1.02	0.82	LN2_1E1_LTQ	7148	2	0.98	15.4	-	-	-	ELILGSETPSS(p)PR
IPI00843911	ACD	R.ELILGSETPSS#PR@.A	0.9	2	N	L	0.76	0.57	1.30135e-06	2.9018	287440	271899	1.06	0.93	LN2_1E1_MSA	6394	2	0.98	15.87	-	-	-	ELILGSETPSS(p)PR()
IPI00843911	ACD	R.ELILGSETPSS#PR.A	0.628931	4	N	H	0.65	0.42	1.38305e-05	3.0035	640188	286747	2.23	0.93	HN4_1E1_MSA	6013	2	0.98	19.85	-	-	-	ELILGSETPSS(p)PR
IPI00946415	ACIN1	K.AES#PAEK^VPEESVLPLVQK^.S	0.813008	0	N	H	0.99	0.98	0	3.1833	5741180	4574387	1.26	0.99	HN0_1E2_MSA	6118	3	0.98	29.99	-	-	-	AES(p)PAEK()VPEESVLPLVQK()
IPI00946415	ACIN1	K.AES#PAEK^VPEESVLPLVQK^.S	0.840336	0	N	H	0.98	0.96	0	3.5763	2943553	2370128	1.24	0.99	HN0_1E2_LTQ	5774	3	0.98	40.33	-	-	-	AES(p)PAEK()VPEESVLPLVQK()
IPI00946415	ACIN1	K.AES#PAEKVPEESVLPLVQK.S	0.787402	0	N	H	0.99	0.98	0	3.9006	14504385	11177820	1.3	0.99	HN0_1E1_MSA	6892	3	0.98	44.08	-	-	-	AES(p)PAEKVPEESVLPLVQK
IPI00946415	ACIN1	K.AES#PAEKVPEESVLPLVQK.S	0.793651	0	N	H	0.99	0.99	0	3.6817	13634729	10706985	1.27	0.97	HN0_1E1_LTQ	8249	3	0.98	39.68	-	-	-	AES(p)PAEKVPEESVLPLVQK
IPI00946415	ACIN1	K.AES#PAEKVPEESVLPLVQK.S	0.813008	0	N	H	0.99	0.98	0	4.0107	5741180	4574387	1.26	0.99	HN0_1E2_MSA	6099	3	0.98	32.4	-	-	-	AES(p)PAEKVPEESVLPLVQK
IPI00946415	ACIN1	K.AES#PAEKVPEESVLPLVQK.S	0.840336	0	N	H	0.98	0.96	0	3.8441	2943553	2370128	1.24	0.99	HN0_1E2_LTQ	5784	3	0.98	26.02	-	-	-	AES(p)PAEKVPEESVLPLVQK
IPI00946415	ACIN1	K.AES#PAEKVPEESVLPLVQK.S	0.970874	0	N	H	0.88	0.77	2.22045e-16	2.737	508127	417149	1.22	0.96	HN0_1E2_LTQ	5790	2	0.98	46.77	-	-	-	AES(p)PAEKVPEESVLPLVQK
IPI00911038	ACIN1	K.AES#PAEK^VPEESVLPLVQK^.S	0.840336	2	N	H	0.98	0.96	0	2.8883	5136532	4353944	1.18	0.99	HN2_1E1_MSA	8326	2	0.98	43.95	-	-	-	AES(p)PAEK()VPEESVLPLVQK()
IPI00946415	ACIN1	K.AES#PAEK^VPEESVLPLVQK^.S	0.884956	2	N	H	1	0.99	0	4.0065	31533765	27697456	1.14	0.99	HN2_1E1_LTQ	9581	3	0.98	38.03	-	-	-	AES(p)PAEK()VPEESVLPLVQK()
IPI00007334	ACIN1	K.AES#PAEK^VPEESVLPLVQK^.S	0.884956	2	N	H	1	0.99	0	3.69	31533765	27697456	1.14	0.99	HN2_1E1_LTQ	9658	3	0.98	55.65	-	-	-	AES(p)PAEK()VPEESVLPLVQK()
IPI00946415	ACIN1	K.AES#PAEK^VPEESVLPLVQK^.S	0.892857	2	N	H	0.98	0.96	0	3.5253	5395068	4827512	1.12	0.99	HN2_1E1_LTQ	9582	2	0.98	43.76	-	-	-	AES(p)PAEK()VPEESVLPLVQK()
IPI00911038	ACIN1	K.AES#PAEK^VPEESVLPLVQK^.S	0.892857	2	N	H	0.99	0.99	0	4.5525	20376419	17825484	1.14	0.99	HN2_1E1_MSA	8354	3	0.98	48.79	-	-	-	AES(p)PAEK()VPEESVLPLVQK()
IPI00007334	ACIN1	K.AES#PAEK^VPEESVLPLVQK^.S	0.892857	2	N	H	0.99	0.99	0	4.5525	20376419	17825484	1.14	0.99	HN2_1E1_MSA	8354	3	0.98	48.79	-	-	-	AES(p)PAEK()VPEESVLPLVQK()
IPI00007334	ACIN1	K.AES#PAEKVPEESVLPLVQK.S	0.840336	2	N	H	0.98	0.96	0	3.5424	5136532	4353944	1.18	0.99	HN2_1E1_MSA	8296	2	0.98	22.24	-	-	-	AES(p)PAEKVPEESVLPLVQK
IPI00911038	ACIN1	K.AES#PAEKVPEESVLPLVQK.S	0.840336	2	N	H	0.98	0.96	0	3.6253	5136532	4353944	1.18	0.99	HN2_1E1_MSA	8349	2	0.98	26.85	-	-	-	AES(p)PAEKVPEESVLPLVQK
IPI00946415	ACIN1	K.AES#PAEKVPEESVLPLVQK.S	0.884956	2	N	H	1	0.99	0	5.0405	31533765	27697456	1.14	0.99	HN2_1E1_LTQ	9563	3	0.98	31.85	-	-	-	AES(p)PAEKVPEESVLPLVQK
IPI00007334	ACIN1	K.AES#PAEKVPEESVLPLVQK.S	0.892857	2	N	H	0.98	0.96	0	3.2459	5395068	4827512	1.12	0.99	HN2_1E1_LTQ	9605	2	0.98	27.68	-	-	-	AES(p)PAEKVPEESVLPLVQK
IPI00946415	ACIN1	K.AES#PAEKVPEESVLPLVQK.S	0.892857	2	N	H	0.98	0.96	0	3.2459	5395068	4827512	1.12	0.99	HN2_1E1_LTQ	9605	2	0.98	27.68	-	-	-	AES(p)PAEKVPEESVLPLVQK
IPI00911038	ACIN1	K.AES#PAEKVPEESVLPLVQK.S	0.892857	2	N	H	0.99	0.99	0	5.1467	20376419	17825484	1.14	0.99	HN2_1E1_MSA	8305	3	0.98	75.75	-	-	-	AES(p)PAEKVPEESVLPLVQK
IPI00007334	ACIN1	K.AES#PAEKVPEESVLPLVQK.S	0.892857	2	N	H	0.99	0.99	0	5.1467	20376419	17825484	1.14	0.99	HN2_1E1_MSA	8305	3	0.98	75.75	-	-	-	AES(p)PAEKVPEESVLPLVQK
IPI00946415	ACIN1	K.AES#PAEK^VPEESVLPLVQK^.S	1.05	2	N	L	0.98	0.97	0	3.9487	2611442	2503136	1.04	0.98	LN2_1E1_MSA	8108	2	0.98	51.19	-	-	-	AES(p)PAEK()VPEESVLPLVQK()
IPI00946415	ACIN1	K.AES#PAEK^VPEESVLPLVQK^.S	1.12	2	N	L	0.99	0.98	0	3.6254	17740501	15571016	1.14	0.99	LN2_1E1_LTQ	9033	3	0.98	27.66	-	-	-	AES(p)PAEK()VPEESVLPLVQK()
IPI00946415	ACIN1	K.AES#PAEK^VPEESVLPLVQK^.S	1.13	2	N	L	1	0.99	0	4.5985	12877646	11518104	1.12	0.99	LN2_1E1_MSA	8097	3	0.98	49.46	-	-	-	AES(p)PAEK()VPEESVLPLVQK()
IPI00946415	ACIN1	K.AES#PAEK^VPEESVLPLVQK^.S	1.17	2	N	L	0.98	0.97	0	3.3313	4135895	3636522	1.14	0.98	LN2_1E1_LTQ	9007	2	0.98	63.54	-	-	-	AES(p)PAEK()VPEESVLPLVQK()
IPI00946415	ACIN1	K.AES#PAEKVPEESVLPLVQK.S	1.05	2	N	L	0.98	0.97	0	3.3585	2611442	2503136	1.04	0.98	LN2_1E1_MSA	8075	2	0.98	28.43	-	-	-	AES(p)PAEKVPEESVLPLVQK
IPI00946415	ACIN1	K.AES#PAEKVPEESVLPLVQK.S	1.12	2	N	L	0.99	0.98	0	4.6383	17740501	15571016	1.14	0.99	LN2_1E1_LTQ	9018	3	0.98	26.04	-	-	-	AES(p)PAEKVPEESVLPLVQK
IPI00946415	ACIN1	K.AES#PAEKVPEESVLPLVQK.S	1.13	2	N	L	1	0.99	0	3.0165	12877646	11518104	1.12	0.99	LN2_1E1_MSA	8089	3	0.98	39.34	-	-	-	AES(p)PAEKVPEESVLPLVQK
IPI00946415	ACIN1	K.AES#PAEKVPEESVLPLVQK.S	1.17	2	N	L	0.98	0.97	0	3.8407	4135895	3636522	1.14	0.98	LN2_1E1_LTQ	9048	2	0.98	38.9	-	-	-	AES(p)PAEKVPEESVLPLVQK
IPI00946415	ACIN1	K.AES#PAEK^VPEESVLPLVQK^.S	0.342466	3	N	H	0.96	0.93	0	4.1434	5233745	1844678	2.84	0.99	HN3_1E2_LTQ	7107	3	0.98	47.89	-	-	-	AES(p)PAEK()VPEESVLPLVQK()
IPI00946415	ACIN1	K.AES#PAEK^VPEESVLPLVQK^.S	0.3861	3	N	H	0.97	0.94	0	2.8513	5549354	2101450	2.64	0.97	HN3_1E1_LTQ	10483	2	0.98	19.2	-	-	-	AES(p)PAEK()VPEESVLPLVQK()
IPI00946415	ACIN1	K.AES#PAEK^VPEESVLPLVQK^.S	0.387597	3	N	H	0.99	0.98	0	4.0259	26549448	10346453	2.57	0.99	HN3_1E1_LTQ	10404	3	0.98	20.52	-	-	-	AES(p)PAEK()VPEESVLPLVQK()
IPI00007334	ACIN1	K.AES#PAEK^VPEESVLPLVQK^.S	0.387597	3	N	H	0.99	0.98	0	4.0259	26549448	10346453	2.57	0.99	HN3_1E1_LTQ	10404	3	0.98	20.52	-	-	-	AES(p)PAEK()VPEESVLPLVQK()
IPI00946415	ACIN1	K.AES#PAEK^VPEESVLPLVQK^.S	0.403226	3	N	H	0.99	0.98	0	3.6273	14189378	5470284	2.59	0.98	HN3_1E1_MSA	8553	3	0.98	36.51	-	-	-	AES(p)PAEK()VPEESVLPLVQK()
IPI00946415	ACIN1	K.AES#PAEK^VPEESVLPLVQK^.S	0.409836	3	N	H	0.98	0.97	0	3.5101	5728114	2312678	2.48	0.99	HN3_1E1_MSA	8510	2	0.98	56.96	-	-	-	AES(p)PAEK()VPEESVLPLVQK()
IPI00946415	ACIN1	K.AES#PAEKVPEESVLPLVQK.S	0.342466	3	N	H	0.96	0.93	0	4.294	5233745	1844678	2.84	0.99	HN3_1E2_LTQ	7102	3	0.98	48.31	-	-	-	AES(p)PAEKVPEESVLPLVQK
IPI00946415	ACIN1	K.AES#PAEKVPEESVLPLVQK.S	0.3861	3	N	H	0.97	0.94	0	3.6107	5549354	2101450	2.64	0.97	HN3_1E1_LTQ	10406	2	0.98	49.33	-	-	-	AES(p)PAEKVPEESVLPLVQK
IPI00007334	ACIN1	K.AES#PAEKVPEESVLPLVQK.S	0.3861	3	N	H	0.97	0.94	0	3.1169	5549354	2101450	2.64	0.97	HN3_1E1_LTQ	10474	2	0.98	14.22	-	-	-	AES(p)PAEKVPEESVLPLVQK
IPI00946415	ACIN1	K.AES#PAEKVPEESVLPLVQK.S	0.387597	3	N	H	0.99	0.98	0	4.7805	26549448	10346453	2.57	0.99	HN3_1E1_LTQ	10425	3	0.98	40.93	-	-	-	AES(p)PAEKVPEESVLPLVQK
IPI00007334	ACIN1	K.AES#PAEKVPEESVLPLVQK.S	0.387597	3	N	H	0.99	0.98	0	4.7805	26549448	10346453	2.57	0.99	HN3_1E1_LTQ	10425	3	0.98	40.93	-	-	-	AES(p)PAEKVPEESVLPLVQK
IPI00946415	ACIN1	K.AES#PAEKVPEESVLPLVQK.S	0.4	3	N	H	0.95	0.9	0	3.7312	2792945	1106756	2.52	0.98	HN3_1E2_MSA	5793	3	0.98	34.22	-	-	-	AES(p)PAEKVPEESVLPLVQK
IPI00946415	ACIN1	K.AES#PAEKVPEESVLPLVQK.S	0.403226	3	N	H	0.99	0.98	0	4.037	14189378	5470284	2.59	0.98	HN3_1E1_MSA	8524	3	0.98	48.55	-	-	-	AES(p)PAEKVPEESVLPLVQK
IPI00946415	ACIN1	K.AES#PAEKVPEESVLPLVQK.S	0.409836	3	N	H	0.98	0.97	0	3.5202	5728114	2312678	2.48	0.99	HN3_1E1_MSA	8489	2	0.98	36.52	-	-	-	AES(p)PAEKVPEESVLPLVQK
IPI00946415	ACIN1	K.AES#PAEKVPEESVLPLVQK.S	0.471698	3	N	H	0.95	0.9	0	2.8084	1511145	576857	2.62	0.97	HN3_1E2_MSA	5799	2	0.98	32.09	-	-	-	AES(p)PAEKVPEESVLPLVQK
IPI00911038	ACIN1	K.AES#PAEK^VPEESVLPLVQK^.S	0.48	3	N	L	0.98	0.95	0	2.8288	2293968	4597812	0.5	0.99	LN3_1E1_LTQ	9541	2	0.98	15.68	-	-	-	AES(p)PAEK()VPEESVLPLVQK()
IPI00946415	ACIN1	K.AES#PAEK^VPEESVLPLVQK^.S	0.48	3	N	L	0.99	0.99	0	4.7907	8319531	17403893	0.48	0.98	LN3_1E1_MSA	8206	3	0.98	68.48	-	-	-	AES(p)PAEK()VPEESVLPLVQK()
IPI00911038	ACIN1	K.AES#PAEK^VPEESVLPLVQK^.S	0.49	3	N	L	0.99	0.99	0	5.2895	12233100	25197404	0.49	0.99	LN3_1E1_LTQ	9477	3	0.98	70.67	-	-	-	AES(p)PAEK()VPEESVLPLVQK()
IPI00946415	ACIN1	K.AES#PAEK^VPEESVLPLVQK^.S	0.52	3	N	L	0.98	0.95	0	3.7188	1658396	3363307	0.49	0.98	LN3_1E1_MSA	8210	2	0.98	30.17	-	-	-	AES(p)PAEK()VPEESVLPLVQK()
IPI00911038	ACIN1	K.AES#PAEKVPEESVLPLVQK.S	0.48	3	N	L	0.98	0.95	0	2.5478	2293968	4597812	0.5	0.99	LN3_1E1_LTQ	9495	2	0.98	31.43	-	-	-	AES(p)PAEKVPEESVLPLVQK
IPI00946415	ACIN1	K.AES#PAEKVPEESVLPLVQK.S	0.48	3	N	L	0.99	0.99	0	3.8857	8319531	17403893	0.48	0.98	LN3_1E1_MSA	8192	3	0.98	40.51	-	-	-	AES(p)PAEKVPEESVLPLVQK
IPI00946415	ACIN1	K.AES#PAEKVPEESVLPLVQK.S	0.52	3	N	L	0.98	0.95	0	3.5247	1658396	3363307	0.49	0.98	LN3_1E1_MSA	8187	2	0.98	25.04	-	-	-	AES(p)PAEKVPEESVLPLVQK
IPI00946415	ACIN1	K.AES#PAEKVPEESVLPLVQK.S	0.199601	4	N	H	0.98	0.95	0	4.5414	8948411	1893549	4.73	0.98	HN4_1E2_LTQ	6404	3	0.98	26.99	-	-	-	AES(p)PAEKVPEESVLPLVQK
IPI00946415	ACIN1	K.AES#PAEKVPEESVLPLVQK.S	0.21322	4	N	H	0.96	0.92	0	4.3845	9290575	1957662	4.75	0.98	HN4_1E2_MSA	5621	3	0.98	73.62	-	-	-	AES(p)PAEKVPEESVLPLVQK
IPI00946415	ACIN1	K.AES#PAEKVPEESVLPLVQK.S	0.243309	4	N	H	0.96	0.92	0	2.7477	3244247	713322	4.55	0.99	HN4_1E2_LTQ	6382	2	0.98	18.1	-	-	-	AES(p)PAEKVPEESVLPLVQK
IPI00946415	ACIN1	K.AES#PAEKVPEESVLPLVQK.S	0.2457	4	N	H	0.99	0.98	0	4.2293	33954419	7991816	4.25	1	HN4_1E1_MSA	7665	3	0.98	46.3	-	-	-	AES(p)PAEKVPEESVLPLVQK
IPI00007334	ACIN1	K.AES#PAEKVPEESVLPLVQK.S	0.2457	4	N	H	0.99	0.98	0	4.2293	33954419	7991816	4.25	1	HN4_1E1_MSA	7665	3	0.98	46.3	-	-	-	AES(p)PAEKVPEESVLPLVQK
IPI00007334	ACIN1	K.AES#PAEKVPEESVLPLVQK.S	0.246305	4	N	H	0.99	0.98	0	3.5365	42292818	9860199	4.29	0.98	HN4_1E1_LTQ	9756	3	0.98	17.85	-	-	-	AES(p)PAEKVPEESVLPLVQK
IPI00911038	ACIN1	K.AES#PAEKVPEESVLPLVQK.S	0.246305	4	N	H	0.99	0.98	0	4.7226	42292818	9860199	4.29	0.98	HN4_1E1_LTQ	9815	3	0.98	49.24	-	-	-	AES(p)PAEKVPEESVLPLVQK
IPI00946415	ACIN1	K.AES#PAEKVPEESVLPLVQK.S	0.248756	4	N	H	0.93	0.86	0	3.2217	2951461	650880	4.53	0.98	HN4_1E2_MSA	5646	2	0.98	1.97	-	-	-	AESPAEKVPEES(p)VLPLVQK
IPI00911038	ACIN1	K.AES#PAEKVPEESVLPLVQK.S	0.257069	4	N	H	0.98	0.96	0	2.9357	16260178	4561831	3.56	0.99	HN4_1E1_LTQ	9774	2	0.98	30.45	-	-	-	AES(p)PAEKVPEESVLPLVQK
IPI00007334	ACIN1	K.AES#PAEKVPEESVLPLVQK.S	0.257069	4	N	H	0.98	0.96	0	2.9357	16260178	4561831	3.56	0.99	HN4_1E1_LTQ	9774	2	0.98	30.45	-	-	-	AES(p)PAEKVPEESVLPLVQK
IPI00946415	ACIN1	K.AES#PAEKVPEESVLPLVQK.S	0.26178	4	N	H	0.85	0.72	1.88738e-15	4.101	9311419	3170085	2.94	0.99	HN4_1E1_MSA	7673	2	0.98	49.26	-	-	-	AES(p)PAEKVPEESVLPLVQK
IPI00007334	ACIN1	K.AES#PAEKVPEESVLPLVQK.S	0.26178	4	N	H	0.85	0.72	1.88738e-15	3.7823	9311419	3170085	2.94	0.99	HN4_1E1_MSA	7725	2	0.98	65.42	-	-	-	AES(p)PAEKVPEESVLPLVQK
IPI00946415	ACIN1	K.AES#PAEK^VPEESVLPLVQK^.S	0.27	4	N	L	0.95	0.9	0	4.0222	1630024	5756564	0.28	0.99	LN4_1E2_LTQ	6585	3	0.98	43.72	-	-	-	AES(p)PAEK()VPEESVLPLVQK()
IPI00946415	ACIN1	K.AES#PAEK^VPEESVLPLVQK^.S	0.28	4	N	L	0.99	0.98	0	3.5853	2989697	10419549	0.29	0.99	LN4_1E1_LTQ	8760	3	0.98	48.04	-	-	-	AES(p)PAEK()VPEESVLPLVQK()
IPI00946415	ACIN1	K.AES#PAEK^VPEESVLPLVQK^.S	0.29	4	N	L	0.96	0.93	0	4.0726	729590	2566644	0.28	0.98	LN4_1E2_MSA	5890	3	0.98	68.13	-	-	-	AES(p)PAEK()VPEESVLPLVQK()
IPI00946415	ACIN1	K.AES#PAEKVPEESVLPLVQK.S	0.27	4	N	L	0.95	0.9	0	3.1086	1630024	5756564	0.28	0.99	LN4_1E2_LTQ	6562	3	0.98	12.87	-	-	-	AES(p)PAEKVPEESVLPLVQK
IPI00946415	ACIN1	K.AES#PAEKVPEESVLPLVQK.S	0.29	4	N	L	0.96	0.93	0	3.3358	729590	2566644	0.28	0.98	LN4_1E2_MSA	5886	3	0.98	21.05	-	-	-	AES(p)PAEKVPEESVLPLVQK
IPI00946415	ACIN1	K.AES#PAEKVPEESVLPLVQK.S	0.245098	5	N	H	0.93	0.87	0	3.2912	939975	188270	4.99	0.93	HN5_3E1_LTQ	4351	3	0.98	16.25	-	-	-	AES(p)PAEKVPEESVLPLVQK
IPI00946415	ACIN1	K.AES#PAEKVPEESVLPLVQK.S	0.273973	5	N	H	0.82	0.67	1.08187e-09	2.8676	486802	78549	6.2	0.97	HN5_3E1_MSA	3707	2	0.98	0.09	-	-	-	AES(p)PAEKVPEESVLPLVQK
IPI00946415	ACIN1	K.AES#PAEKVPEESVLPLVQK.S	0.327869	5	N	H	0.81	0.66	8.83351e-10	3.1781	752970	157204	4.79	0.94	HN5_3E1_LTQ	4352	2	0.98	70.34	-	-	-	AES(p)PAEKVPEESVLPLVQK
IPI00911038	ACIN1	K.AES#PAEKVPEESVLPLVQK.S	0.350877	5	N	H	0.74	0.54	2.28245e-06	2.6437	1414239	273502	5.17	0.86	HN5_1E1_LTQ	6582	2	0.98	29.9	-	-	-	AES(p)PAEKVPEESVLPLVQK
IPI00946415	ACIN1	K.AES#PAEK^VPEESVLPLVQK^.S	0.27	5	N	L	0.93	0.86	0	3.3572	234049	825897	0.28	0.99	LN5_3E1_LTQ	4266	3	0.98	37.16	-	-	-	AES(p)PAEK()VPEESVLPLVQK()
IPI00911038	ACIN1	K.AES#PAEK^VPEESVLPLVQK^.S	0.29	5	N	L	0.93	0.86	0	4.0369	171922	607847	0.28	0.98	LN5_3E1_MSA	3492	3	0.98	43.52	-	-	-	AES(p)PAEK()VPEESVLPLVQK()
IPI00911038	ACIN1	K.AES#PAEK^VPEESVLPLVQK^.S	0.31	5	N	L	0.91	0.84	2.22045e-15	2.6923	116646	362747	0.32	0.98	LN5_3E1_MSA	3502	2	0.98	31.07	-	-	-	AES(p)PAEK()VPEESVLPLVQK()
IPI00946415	ACIN1	K.AES#PAEKVPEESVLPLVQK.S	0.27	5	N	L	0.93	0.86	0	3.3829	234049	825897	0.28	0.99	LN5_3E1_LTQ	4276	3	0.98	24.34	-	-	-	AES(p)PAEKVPEESVLPLVQK
IPI00946415	ACIN1	K.ASLVALPEQT#ASEEETPPPLLTK^.E	0.24	4	N	L	0.8	0.64	1.9081e-08	3.1665	304843	988714	0.31	0.95	LN4_1E1_MSA	8635	3	0.98	3.28	-	-	-	ASLVALPEQT(p)ASEEETPPPLLTK()
IPI00946415	ACIN1	K.ASLVALPEQT#ASEEETPPPLLTK^.E	0.44	5	N	L	0.92	0.84	0	2.6447	394888	1088610	0.36	0.97	LN5_1E1_MSA	6938	2	0.98	7.35	-	-	-	ASLVALPEQT(p)ASEEETPPPLLTK()
IPI00946415	ACIN1	K.ASLVALPEQTAS#EEETPPPLLTK.E	0.632911	3	N	H	0.86	0.74	4.32005e-10	3.4067	2000778	1111501	1.8	0.96	HN3_1E1_MSA	9856	2	0.98	15.24	-	-	-	ASLVALPEQTAS(p)EEETPPPLLTK
IPI00946415	ACIN1	K.ASLVALPEQTAS#EEETPPPLLTK.E	1.05263	3	N	H	0.64	0.4	0.000519783	3.0591	890546	558064	1.6	0.81	HN3_1E1_MSA	9843	3	0.98	5.87	-	-	-	ASLVALPEQTAS(p)EEETPPPLLTK
IPI00911038	ACIN1	K.ASLVALPEQTASEEET#PPPLLTK.E	1.02041	2	N	H	0.96	0.92	3.70814e-14	3.3359	2191937	2406614	0.91	0.96	HN2_1E1_MSA	9401	2	0.98	6.59	-	-	-	ASLVALPEQTASEEET(p)PPPLLTK
IPI00911038	ACIN1	K.ASLVALPEQTASEEET#PPPLLTK^.E	1.02041	2	N	H	0.96	0.92	3.70814e-14	3.1695	2191937	2406614	0.91	0.96	HN2_1E1_MSA	9390	2	0.98	14.54	-	-	-	ASLVALPEQTASEEET(p)PPPLLTK()
IPI00007334	ACIN1	K.ASLVALPEQTASEEET#PPPLLTK^.E	1.02041	2	N	H	0.96	0.92	3.70814e-14	3.1695	2191937	2406614	0.91	0.96	HN2_1E1_MSA	9390	2	0.98	14.54	-	-	-	ASLVALPEQTASEEET(p)PPPLLTK()
IPI00946415	ACIN1	K.ASLVALPEQTASEEET#PPPLLTK.E	0.47	2	N	L	0.75	0.56	5.60622e-07	3.9217	2321217	3273271	0.71	0.9	LN2_1E1_MSA	9218	2	0.98	22.45	-	-	-	ASLVALPEQTASEEET(p)PPPLLTK
IPI00946415	ACIN1	K.ASLVALPEQTASEEET#PPPLLTK.E	0.94	2	N	L	0.94	0.87	0	3.2221	2435427	2430542	1	0.94	LN2_1E1_LTQ	10214	3	0.98	4.22	-	-	-	ASLVALPEQTASEEET(p)PPPLLTK
IPI00946415	ACIN1	K.ASLVALPEQTASEEET#PPPLLTK.E	1.19	2	N	L	0.91	0.83	2.44059e-10	2.9095	2281109	1958997	1.16	0.97	LN2_1E1_LTQ	10203	2	0.98	3.44	-	-	-	ASLVALPEQTASEEET(p)PPPLLTK
IPI00946415	ACIN1	K.ASLVALPEQTASEEET#PPPLLTK.E	0.452489	3	N	H	0.88	0.78	4.58257e-11	3.635	2337898	732876	3.19	0.94	HN3_1E1_MSA	9750	2	0.98	16.35	-	-	-	ASLVALPEQTASEEET(p)PPPLLTK
IPI00946415	ACIN1	K.ASLVALPEQTASEEET#PPPLLTK.E	0.423729	4	N	H	0.85	0.72	3.44247e-12	4.5394	4226779	1212985	3.48	0.96	HN4_1E1_MSA	8934	2	0.98	18.56	-	-	-	ASLVALPEQTASEEET(p)PPPLLTK
IPI00007334	ACIN1	K.ASLVALPEQTASEEET#PPPLLTK.E	0.423729	4	N	H	0.85	0.72	3.44247e-12	4.5394	4226779	1212985	3.48	0.96	HN4_1E1_MSA	8934	2	0.98	18.56	-	-	-	ASLVALPEQTASEEET(p)PPPLLTK
IPI00946415	ACIN1	K.GVPAGNS#DTEGGQPGR.K	0.980392	0	N	H	0.93	0.86	2.36852e-08	2.8425	688820	683297	1.01	0.97	HN0_1E1_LTQ	3452	2	0.98	23.32	-	-	-	GVPAGNS(p)DTEGGQPGR
IPI00946415	ACIN1	K.GVPAGNS#DTEGGQPGR@.K	0.847458	0	N	H	0.91	0.84	3.38849e-08	2.6523	540120	552713	0.98	0.76	HN0_1E1_MSA	3404	2	0.98	12.13	-	-	-	GVPAGNS(p)DTEGGQPGR()
IPI00946415	ACIN1	K.GVPAGNS#DTEGGQPGR@.K	0.980392	0	N	H	0.93	0.86	2.36852e-08	2.8029	688820	683297	1.01	0.97	HN0_1E1_LTQ	3461	2	0.98	13.24	-	-	-	GVPAGNS(p)DTEGGQPGR()
IPI00946415	ACIN1	K.GVPAGNS#DTEGGQPGR.K	0.862069	2	N	H	0.98	0.95	1.14353e-14	3.3791	1335911	1327164	1.01	0.97	HN2_1E1_LTQ	3924	2	0.98	27.84	-	-	-	GVPAGNS(p)DTEGGQPGR
IPI00007334	ACIN1	K.GVPAGNS#DTEGGQPGR@.K	0.862069	2	N	H	0.98	0.95	1.14353e-14	2.9832	1335911	1327164	1.01	0.97	HN2_1E1_LTQ	3958	2	0.98	13.24	-	-	-	GVPAGNS(p)DTEGGQPGR()
IPI00946415	ACIN1	K.GVPAGNS#DTEGGQPGR@.K	0.862069	2	N	H	0.98	0.95	1.14353e-14	2.9832	1335911	1327164	1.01	0.97	HN2_1E1_LTQ	3958	2	0.98	13.24	-	-	-	GVPAGNS(p)DTEGGQPGR()
IPI00946415	ACIN1	K.GVPAGNS#DTEGGQPGR.K	1.02	2	N	L	0.97	0.93	6.86362e-11	2.6631	794190	808913	0.98	0.94	LN2_1E1_LTQ	3716	2	0.98	26.73	-	-	-	GVPAGNS(p)DTEGGQPGR
IPI00946415	ACIN1	K.GVPAGNS#DTEGGQPGR.K	1.06	2	N	L	0.99	0.97	1.11022e-16	2.7012	671122	637111	1.05	0.96	LN2_1E1_MSA	3618	2	0.98	23.07	-	-	-	GVPAGNS(p)DTEGGQPGR
IPI00946415	ACIN1	K.GVPAGNS#DTEGGQPGR.K	0.416667	3	N	H	0.9	0.81	2.17058e-08	3.4399	1883521	747624	2.52	0.96	HN3_1E1_LTQ	4446	2	0.98	26.73	-	-	-	GVPAGNS(p)DTEGGQPGR
IPI00946415	ACIN1	K.GVPAGNS#DTEGGQPGR.K	0.719424	3	N	H	0.6	0.36	0.00315639	3.0379	1098760	687065	1.6	0.99	HN3_1E1_MSA	3809	2	0.98	25.66	-	-	-	GVPAGNS(p)DTEGGQPGR
IPI00946415	ACIN1	K.GVPAGNS#DTEGGQPGR@.K	0.719424	3	N	H	0.6	0.36	0.00315639	2.6385	1098760	687065	1.6	0.99	HN3_1E1_MSA	3820	2	0.98	15.55	-	-	-	GVPAGNS(p)DTEGGQPGR()
IPI00911038	ACIN1	K.GVPAGNS#DTEGGQPGR.K	0.47	3	N	L	0.96	0.93	2.39142e-11	2.5717	379088	816956	0.46	0.91	LN3_1E1_LTQ	4039	2	0.98	14.86	-	-	-	GVPAGNS(p)DTEGGQPGR
IPI00911038	ACIN1	K.GVPAGNS#DTEGGQPGR@.K	0.61	3	N	L	0.81	0.66	6.50355e-10	2.7479	819578	1266685	0.65	0.82	LN3_1E1_LTQ	3992	2	0.98	12.31	-	-	-	GVPAGNS(p)DTEGGQPGR()
IPI00911038	ACIN1	K.GVPAGNS#DTEGGQPGR.K	0.283286	4	N	H	0.95	0.91	0	3.2762	2731596	715641	3.82	0.92	HN4_1E1_LTQ	2098	2	0.98	24.29	-	-	-	GVPAGNS(p)DTEGGQPGR
IPI00007334	ACIN1	K.GVPAGNS#DTEGGQPGR.K	0.283286	4	N	H	0.95	0.91	0	3.2762	2731596	715641	3.82	0.92	HN4_1E1_LTQ	2098	2	0.98	24.29	-	-	-	GVPAGNS(p)DTEGGQPGR
IPI00946415	ACIN1	K.GVPAGNS#DTEGGQPGR.K	0.45045	4	N	H	0.86	0.74	1.85041e-09	3.3869	912114	458169	1.99	0.93	HN4_1E1_MSA	590	2	0.98	26.73	-	-	-	GVPAGNS(p)DTEGGQPGR
IPI00911038	ACIN1	K.GVPAGNS#DTEGGQPGR.K	0.275482	5	N	H	0.84	0.7	5.48329e-10	2.6736	1396362	443662	3.15	0.94	HN5_1E1_LTQ	1917	2	0.98	17.95	-	-	-	GVPAGNS(p)DTEGGQPGR
IPI00215975	ACIN1	K.GVPAGNS#DTEGGQPGR.K	0.3003	5	N	H	0.83	0.68	8.26437e-08	3.2984	1339221	466205	2.87	0.92	HN5_1E1_MSA	1866	2	0.98	18.9	-	-	-	GVPAGNS(p)DTEGGQPGR
IPI00946415	ACIN1	K.GVPAGNS#DTEGGQPGR@.K	0.49	5	N	L	0.93	0.87	0	2.6724	681633	1689318	0.4	0.81	LN5_1E1_MSA	1939	2	0.98	28.47	-	-	-	GVPAGNS(p)DTEGGQPGR()
IPI00911038	ACIN1	K.SLIPDIKPLAGQEAVVDLHADDS#RISEDETER.N	0.961538	2	N	H	0.99	0.98	0	3.9207	14039891	13589381	1.03	0.96	HN2_1E1_MSA	9417	4	0.98	3.57	-	-	-	SLIPDIKPLAGQEAVVDLHADDS(p)RISEDETER
IPI00007334	ACIN1	K.SLIPDIKPLAGQEAVVDLHADDS#RISEDETER.N	0.961538	2	N	H	0.99	0.98	0	3.9207	14039891	13589381	1.03	0.96	HN2_1E1_MSA	9417	4	0.98	3.57	-	-	-	SLIPDIKPLAGQEAVVDLHADDS(p)RISEDETER
IPI00911038	ACIN1	K.SLIPDIKPLAGQEAVVDLHADDS#RISEDETER.N	0.51	3	N	L	0.97	0.94	0	3.9014	4269488	8387366	0.51	0.97	LN3_1E1_LTQ	10816	4	0.98	5.63	-	-	-	SLIPDIKPLAGQEAVVDLHADDS(p)RISEDETER
IPI00911038	ACIN1	K.SLIPDIKPLAGQEAVVDLHADDS#RISEDETER.N	0.289855	4	N	H	0.99	0.98	0	5.0223	62621836	17901130	3.5	0.96	HN4_1E1_LTQ	11192	4	0.98	10.93	-	-	-	SLIPDIKPLAGQEAVVDLHADDS(p)RISEDETER
IPI00946415	ACIN1	K.SSSISEEKGDS#DDEKPR.K	0.228311	5	N	H	0.95	0.9	2.40348e-08	2.9333	456266	123448	3.7	1	HN5_9E1_MSA	1934	2	0.98	10.57	-	-	-	SSSISEEKGDS(p)DDEKPR
IPI00946415	ACIN1	K.SSSISEEKGDS#DDEKPR.K	3.125	5	N	H	0.19	0.04	0.216423	3.5374	806448	874544	0.92	0.52	HN5_9E1_MSA	1940	3	0.98	16.89	-	-	-	SSSISEEKGDS(p)DDEKPR
IPI00946415	ACIN1	K.TTS#PLEEEER@.E	0.38	4	N	L	0.98	0.96	0	2.8383	308746	833503	0.37	0.91	LN4_1E1_MSA	3826	2	0.98	22.33	-	-	-	TTS(p)PLEEEER()
IPI00946415	ACIN1	R.EAAELEEAS#AES#EDEMIHPEGV.A	0.98	3	N	L	1	0.99	0	2.9068	1924231	1991502	0.97	0.95	LN3_1E1_MSA	8443	2	0.98	0	-	-	-	EAAELEEAS(p)AES(p)EDEMIHPEGV
IPI00946415	ACIN1	R.ELLVSQHTVQLVGGLS#PLSSPSDTK.A	0.239127	2	N	L	-1	0	1	3.8021	4560653	19072063	0.24	0.9	LN2_1E1_LTQ	10336	3	0.98	16.63	-	-	-	ELLVSQHTVQLVGGLS(p)PLSSPSDTK
IPI00946415	ACIN1	R.ELLVSQHTVQLVGGLS#PLSSPSDTK.A	3.88041	3	N	H	-1	0	1	3.9191	3952386	15336863	0.26	0.96	HN3_1E1_LTQ	12006	3	0.98	32.74	-	-	-	ELLVSQHTVQLVGGLS(p)PLSSPSDTK
IPI00946415	ACIN1	R.ELLVSQHTVQLVGGLS#PLSSPSDTK.A	3.25205	3	N	H	-1	0	1	3.7461	2827398	9194838	0.31	0.84	HN3_1E1_MSA	9847	3	0.98	6.59	-	-	-	ELLVSQHTVQLVGGLS(p)PLSSPSDTK
IPI00911038	ACIN1	R.ELLVSQHTVQLVGGLS#PLSSPSDTK.A	3.00631	4	N	H	-1	0	1	3.8995	10136052	30472153	0.33	0.92	HN4_1E1_LTQ	11262	3	0.98	24.27	-	-	-	ELLVSQHTVQLVGGLS(p)PLSSPSDTK
IPI00946415	ACIN1	R.ELLVSQHTVQLVGGLS#PLSSPSDTK.A	3.25272	4	N	H	-1	0	1	3.8837	1720906	5597626	0.31	0.86	HN4_1E2_MSA	6796	3	0.98	11.14	-	-	-	ELLVSQHTVQLVGGLS(p)PLSSPSDTK
IPI00946415	ACIN1	V.DLHADDSRIS#EDETER.N	0.97	2	N	L	0.93	0.86	3.94653e-10	3.3441	159205	152507	1.04	0.91	LN2_1E1_LTQ	5152	2	0.98	14.05	-	-	-	DLHADDSRIS(p)EDETER
IPI00946415	ACIN1	V.DLHADDSRIS#EDETER.N	0.328947	5	N	H	0.98	0.95	0	3.2447	1610964	502800	3.2	0.99	HN5_9E1_MSA	2825	2	0.98	5.83	-	-	-	DLHADDSRIS(p)EDETER
IPI00946415	ACIN1	V.GGLS#PLSSPSDTK.A	1.92308	4	N	H	0.37	0.14	0.0431028	2.7899	1205380	1511321	0.8	0.45	HN4_1E1_MSA	4939	2	0.98	53.56	-	-	-	GGLS(p)PLSSPSDTK
IPI00007334	ACIN1	V.GGLS#PLSSPSDTK.A	1.92308	4	N	H	0.37	0.14	0.0431028	2.7899	1205380	1511321	0.8	0.45	HN4_1E1_MSA	4939	2	0.98	53.56	-	-	-	GGLS(p)PLSSPSDTK
IPI00946415	ACIN1	V.GGLS#PLSSPSDTK.A	22.451	5	N	H	-1	0	1	2.7517	155578	3492880	0.04	0.99	HN5_3E1_MSA	2670	2	0.98	47.99	-	-	-	GGLS(p)PLSSPSDTK
IPI00796345	ACOX2	S.FLPELHALS#TGM*K^AMMS#EFCTQGAEM*CR@.R	100	0	N	H	0.11	0.01	0.176618	3.7302	216107	18079231	0.01	0.42	HN0_1E1_MSA	7218	3	0.98	4.98	15.01	-	-	FLPELHALS(p)TGM()K()AMMS(p)EFC()TQGAEM()C()R()
IPI00292787	ACTR5	R.GAS#GPQVGNALGSLEPLR@.W	7.49564	3	N	H	-1	0	1	2.6848	138793	1040343	0.13	0.86	HN3_1E1_LTQ	11696	2	0.98	42.5	-	-	-	GAS(p)GPQVGNALGSLEPLR()
IPI00292787	ACTR5	R.GAS#GPQVGNALGSLEPLR@.W	8.73569	3	N	H	-1	0	1	3.7304	71806	627275	0.11	0.86	HN3_1E1_MSA	9554	2	0.98	68.07	-	-	-	GAS(p)GPQVGNALGSLEPLR()
IPI00292787	ACTR5	R.GAS#GPQVGNALGSLEPLR.W	5.77312	3	N	L	-1	0	1	3.7754	834048	144471	5.77	0.94	LN3_1E1_MSA	9144	2	0.98	76.25	-	-	-	GAS(p)GPQVGNALGSLEPLR
IPI00442076	ADAMTS18	R.K^IDANCTAR@LR@TLNFFFAMS#G.K	44.8833	5	N	H	-1	0	1	3.5675	8508	381867	0.02	0.96	HN5_8E1_MSA	3590	3	0.98	15.86	-	-	-	K()IDANC()TAR()LR()TLNFFFAMS(p)G
IPI00022215	ADNP	K.VIPEDAS#ESEEK^LDQK^.E	0.892857	2	N	H	0.97	0.93	0	3.4042	531933	500603	1.06	0.9	HN2_1E1_MSA	5656	2	0.98	10.89	-	-	-	VIPEDAS(p)ESEEK()LDQK()
IPI00022215	ADNP	K.VIPEDAS#ESEEKLDQK.E	0.892857	2	N	H	0.97	0.93	0	2.5916	531933	500603	1.06	0.9	HN2_1E1_MSA	5657	2	0.98	7.47	-	-	-	VIPEDAS(p)ESEEKLDQK
IPI00022215	ADNP	K.VIPEDAS#ESEEKLDQK.E	1.07527	2	N	H	0.97	0.94	0	2.619	1043368	1066837	0.98	0.97	HN2_1E1_LTQ	6354	2	0.98	13.94	-	-	-	VIPEDAS(p)ESEEKLDQK
IPI00022215	ADNP	K.VIPEDAS#ESEEK^LDQK^.E	1.24	2	N	L	0.91	0.83	7.90669e-09	3.4349	593754	383522	1.55	0.95	LN2_1E1_MSA	5430	2	0.98	8.4	-	-	-	VIPEDAS(p)ESEEK()LDQK()
IPI00022215	ADNP	K.VIPEDAS#ESEEK^LDQK^.E	0.78	3	N	L	0.98	0.95	0	2.7845	512210	661874	0.77	0.94	LN3_1E1_LTQ	6322	2	0.98	9.32	-	-	-	VIPEDAS(p)ESEEK()LDQK()
IPI00022215	ADNP	K.VIPEDAS#ESEEK^LDQK^.E	0.78	3	N	L	0.98	0.96	1.52101e-14	3.1152	280312	386705	0.72	0.96	LN3_1E1_MSA	5510	2	0.98	26.34	-	-	-	VIPEDAS(p)ESEEK()LDQK()
IPI00022215	ADNP	K.VIPEDAS#ESEEKLDQK.E	0.78	3	N	L	0.98	0.95	0	2.6939	512210	661874	0.77	0.94	LN3_1E1_LTQ	6334	2	0.98	0.9	-	-	-	VIPEDAS(p)ESEEKLDQK
IPI00221389	AFF2	R.VAT#PEPEPPSTNK^.W	0.43	5	N	L	0.65	0.42	9.36822e-06	2.5809	144427	207895	0.69	0.9	LN5_2E1_MSA	1614	2	0.98	48.22	-	-	-	VAT(p)PEPEPPSTNK()
IPI00878213	AHCTF1P1;AHCTF1	K.LPISDS#PPDTQEIHVIEQEK.L	1.28	2	N	L	0.91	0.82	8.21565e-15	3.1844	1789386	1452901	1.23	0.98	LN2_1E1_MSA	8395	3	0.98	13.12	-	-	-	LPISDS(p)PPDTQEIHVIEQEK
IPI00878213	AHCTF1P1;AHCTF1	K.LPISDS#PPDTQEIHVIEQEK.L	0.98	3	N	L	0.9	0.81	4.2133e-12	3.9574	2276074	2213556	1.03	0.93	LN3_1E1_LTQ	9874	3	0.98	0.75	-	-	-	LPISDS(p)PPDTQEIHVIEQEK
IPI00217957	AHCTF1P1;AHCTF1	K.LPISDS#PPDTQEIHVIEQEK^.L	0.97	3	N	L	0.88	0.77	3.33067e-16	5.0636	2298130	2406310	0.96	0.89	LN3_1E1_MSA	8502	3	0.98	11.37	-	-	-	LPISDS(p)PPDTQEIHVIEQEK()
IPI00217957	AHCTF1P1;AHCTF1	K.LPISDS#PPDTQEIHVIEQEK.L	0.632911	4	N	H	0.89	0.79	2.80784e-09	3.347	2314147	1247387	1.86	0.85	HN4_1E1_MSA	7995	3	0.98	12.61	-	-	-	LPISDS(p)PPDTQEIHVIEQEK
IPI00158627	AKAP1	R.DK^AIT#PPLPESTVPFSNGVLK^.G	0.917431	0	N	H	0.93	0.87	1.26565e-14	3.0162	767815	669890	1.15	0.94	HN0_1E2_LTQ	6564	3	0.98	11.28	-	-	-	DK()AIT(p)PPLPESTVPFSNGVLK()
IPI00158627	AKAP1	R.DKAIT#PPLPESTVPFSNGVLK.G	0.917431	0	N	H	0.93	0.87	1.26565e-14	3.2535	767815	669890	1.15	0.94	HN0_1E2_LTQ	6565	3	0.98	23.2	-	-	-	DKAIT(p)PPLPESTVPFSNGVLK
IPI00158627	AKAP1	R.DKAIT#PPLPESTVPFSNGVLK.G	1.28205	2	N	H	0.79	0.63	2.41309e-08	3.087	1040269	1076313	0.97	0.81	HN2_1E1_LTQ	10715	3	0.98	11.99	-	-	-	DKAIT(p)PPLPESTVPFSNGVLK
IPI00942186	AKAP1	R.DKAIT#PPLPESTVPFSNGVLK.G	1	3	N	H	0.9	0.82	1.11022e-16	3.2262	1457516	1315084	1.11	0.93	HN3_1E2_LTQ	8048	3	0.98	14.19	-	-	-	DKAIT(p)PPLPESTVPFSNGVLK
IPI00158627	AKAP1	R.DKAIT#PPLPESTVPFSNGVLK.G	0.47619	4	N	H	0.82	0.68	1.27676e-14	3.1754	2365679	1017522	2.32	0.94	HN4_1E2_MSA	6634	3	0.98	13.77	-	-	-	DKAIT(p)PPLPESTVPFSNGVLK
IPI00014474	AKAP8	R.VDSEGDFS#ENDDAAGDFR.S	0.4329	4	N	H	0.95	0.89	0	3.356	1712584	620921	2.76	0.91	HN4_1E1_LTQ	8058	2	0.98	32.92	-	-	-	VDSEGDFS(p)ENDDAAGDFR
IPI00014474	AKAP8	R.VDSEGDFS#ENDDAAGDFR.S	0.456621	4	N	H	0.92	0.84	1.43996e-13	4.0555	1319905	410869	3.21	0.98	HN4_1E1_MSA	6206	2	0.98	34.21	-	-	-	VDSEGDFS(p)ENDDAAGDFR
IPI00014474	AKAP8	R.VDSEGDFS#ENDDAAGDFR.S	0.54	5	N	L	0.92	0.84	3.97571e-13	3.3843	427843	797952	0.54	0.95	LN5_1E1_MSA	4937	2	0.98	18.82	-	-	-	VDSEGDFS(p)ENDDAAGDFR
IPI00014474	AKAP8	R.VDSEGDFS#ENDDAAGDFR@.S	0.39	5	N	L	0.85	0.72	6.20271e-12	2.7223	584714	1204663	0.49	0.91	LN5_1E1_LTQ	5327	2	0.98	19.84	-	-	-	VDSEGDFS(p)ENDDAAGDFR()
IPI00792557	ALPK2	L.T#ANNECFQATRETEDTSTVT#IAT#EVHPAK.Y	0.666667	4	N	H	0.37	0.14	1.91142e-05	3.015	95067503	14386413	6.61	0.25	HN4_1E1_LTQ	12158	3	0.98	9.18	0.87	0.17	-	T(p)ANNEC()FQATRETEDTSTVT(p)IAT(p)EVHPAK
IPI00295005	ALS2	R.VAATYEAGALS#LKKVM*NFY#S#TTPCETGAQAGS.S	0.0797766	4	N	H	-1	0	1	3.5699	29176555	2327605	12.54	0.94	HN4_1E1_MSA	7873	3	0.98	4.8	0.65	0.37	-	VAATYEAGALS(p)LKKVM()NFY(p)S(p)TTPC()ETGAQAGS
IPI00793058	AMT	K.IGT#VT#S#GCPSPSLKKNVAMGYVPCEYSRPG.T	0.159744	4	N	H	0.45	0.2	4.17088e-05	3.3882	45257929	2912522	15.54	0.43	HN4_1E1_MSA	8245	3	0.98	11.79	8.85	10.8	-	IGT(p)VT(p)S(p)GC()PSPSLKKNVAMGYVPC()EYSRPG
IPI00033907	ANAPC1	R.NFDFEGSLS#PVIAPK.K	0.980392	2	N	H	0.91	0.82	0	4.0835	932233	916913	1.02	0.95	HN2_1E1_MSA	9683	2	0.98	10.55	-	-	-	NFDFEGSLS(p)PVIAPK
IPI00033907	ANAPC1	R.NFDFEGSLS#PVIAPK.K	1.16279	2	N	H	0.73	0.53	2.287e-06	2.8951	1019004	909853	1.12	0.82	HN2_1E1_LTQ	11033	2	0.98	23.58	-	-	-	NFDFEGSLS(p)PVIAPK
IPI00033907	ANAPC1	R.NFDFEGSLS#PVIAPK^.K	1.16279	2	N	H	0.73	0.53	2.287e-06	3.3152	1019004	909853	1.12	0.82	HN2_1E1_LTQ	11036	2	0.98	17.29	-	-	-	NFDFEGSLS(p)PVIAPK()
IPI00033907	ANAPC1	R.NFDFEGSLS#PVIAPK.K	1.03	2	N	L	0.92	0.84	0	2.5468	1362819	1299002	1.05	0.97	LN2_1E1_MSA	9549	2	0.98	29.59	-	-	-	NFDFEGSLS(p)PVIAPK
IPI00033907	ANAPC1	R.NFDFEGSLS#PVIAPK.K	1.12	2	N	L	0.89	0.78	4.44089e-16	3.4081	1336899	1207870	1.11	0.96	LN2_1E1_LTQ	10535	2	0.98	12.31	-	-	-	NFDFEGSLS(p)PVIAPK
IPI00033907	ANAPC1	R.NFDFEGSLS#PVIAPK^.K	0.909091	3	N	H	0.84	0.71	2.08205e-11	3.6235	950133	1144533	0.83	0.84	HN3_1E1_LTQ	12234	2	0.98	38.73	-	-	-	NFDFEGSLS(p)PVIAPK()
IPI00033907	ANAPC1	R.NFDFEGSLS#PVIAPK.K	1.33	3	N	L	0.85	0.73	1.58096e-13	2.9182	1132847	984909	1.15	0.95	LN3_1E1_LTQ	11094	2	0.98	15.74	-	-	-	NFDFEGSLS(p)PVIAPK
IPI00033907	ANAPC1	R.NFDFEGSLS#PVIAPK.K	0.571429	4	N	H	0.6	0.35	6.12754e-05	3.7372	1334456	555393	2.4	0.93	HN4_1E1_LTQ	11494	2	0.98	18.17	-	-	-	NFDFEGSLS(p)PVIAPK
IPI00033907	ANAPC1	R.NFDFEGSLS#PVIAPK.K	0.961538	5	N	H	0.61	0.37	2.08395e-05	3.1401	334433	284974	1.17	0.88	HN5_1E1_MSA	7167	2	0.98	25.87	-	-	-	NFDFEGSLS(p)PVIAPK
IPI00074962	ANK2	L.AET#PETS#PESLS#FS#PK.K	0.0365962	0	N	H	-1	0	1	2.5943	472098	17277	27.33	0.92	HN0_1E1_LTQ	4603	2	0.98	41.94	0	28.47	23.16	AET(p)PETS(p)PESLS(p)FS(p)PK
IPI00657687	ANLN	K.AAS#PPRPLLSNASATPVGR.R	2.42	2	N	L	0.98	0.95	0	3.007	4843374	1974505	2.45	0.97	LN2_1E1_LTQ	6932	3	0.98	13.59	-	-	-	AAS(p)PPRPLLSNASATPVGR
IPI00007423	ANP32B	R.K^R@ET#DDEGEDD.-	0.434783	5	N	H	0.98	0.97	0	3.0959	1101448	460081	2.39	0.99	HN5_9E1_MSA	315	2	0.98	0	-	-	-	K()R()ET(p)DDEGEDD
IPI00411453	AP3D1	R.HSSLPTES#DEDIAPAQQV.D	0.9	3	N	L	0.97	0.95	7.43849e-15	2.8417	370017	455995	0.81	0.93	LN3_1E1_MSA	6979	2	0.98	14.88	-	-	-	HSSLPTES(p)DEDIAPAQQV
IPI00908880	APBB1IP	R.QRVLGTGMMSVPEGEASLT#PSAGFAS.R	1.04	4	N	L	0.3	0.09	0.0753619	3.0402	453149	321854	1.41	0.94	LN4_1E2_MSA	6648	3	0.98	4.11	-	-	-	QRVLGTGMMSVPEGEASLT(p)PSAGFAS
IPI00855856	API5	R.ASEDTTS#GSPPKK.S	1.48	2	N	L	0.98	0.97	0	2.9301	4476018	2997215	1.49	0.98	LN2_1E1_MSA	526	2	0.98	7.54	-	-	-	ASEDTTS(p)GSPPKK
IPI00607600	APLP1	D.ELAPAGTGVS#R.E	5.55556	2	N	H	0.55	0.3	2.15817e-09	2.5126	2154604	6648298	0.32	0.93	HN2_1E1_MSA	1461	2	0.98	6.23	-	-	-	ELAPAGTGVS(p)R
IPI00657743	APOA5	P.AT#LKDS#LEQDLNNM*NKFLEK.L	0.0779836	4	N	H	-1	0	1	3.3749	8913491	695106	12.82	0.96	HN4_1E1_MSA	8154	3	0.98	0	-	-	-	AT(p)LKDS(p)LEQDLNNM()NKFLEK
IPI00747804	ARHGAP9	R.LSGSGPAELS#AGEDEEEESELVSK^PLLR@.L	0.763359	0	N	H	0.99	0.99	0	3.5211	7790309	6486877	1.2	0.99	HN0_1E1_LTQ	8868	3	0.98	8.68	-	-	-	LSGSGPAELS(p)AGEDEEEESELVSK()PLLR()
IPI00747804	ARHGAP9	R.LSGSGPAELS#AGEDEEEESELVSKPLLR.L	0.729927	0	N	H	0.98	0.96	0	5.2586	8335097	6463393	1.29	0.98	HN0_1E1_MSA	7323	3	0.98	41.12	-	-	-	LSGSGPAELS(p)AGEDEEEESELVSKPLLR
IPI00747804	ARHGAP9	R.LSGSGPAELS#AGEDEEEESELVSKPLLR.L	0.763359	0	N	H	0.99	0.99	0	3.5794	7790309	6486877	1.2	0.99	HN0_1E1_LTQ	8861	3	0.98	10.87	-	-	-	LSGSGPAELS(p)AGEDEEEESELVSKPLLR
IPI00747804	ARHGAP9	R.LSGSGPAELS#AGEDEEEESELVSK^PLLR@.L	0.763359	2	N	H	0.99	0.98	0	3.398	17837135	14127558	1.26	0.97	HN2_1E1_LTQ	10518	3	0.98	2.97	-	-	-	LSGSGPAELS(p)AGEDEEEESELVSK()PLLR()
IPI00747804	ARHGAP9	R.LSGSGPAELS#AGEDEEEESELVSKPLLR.L	0.763359	2	N	H	0.99	0.98	0	3.5538	17837135	14127558	1.26	0.97	HN2_1E1_LTQ	10479	3	0.98	12.5	-	-	-	LSGSGPAELS(p)AGEDEEEESELVSKPLLR
IPI00747804	ARHGAP9	R.LSGSGPAELS#AGEDEEEESELVSKPLLR.L	0.787402	2	N	H	0.99	0.99	0	4.4845	13650628	10879061	1.25	0.97	HN2_1E1_MSA	9181	3	0.98	37.74	-	-	-	LSGSGPAELS(p)AGEDEEEESELVSKPLLR
IPI00747804	ARHGAP9	R.LSGSGPAELS#AGEDEEEESELVSK^PLLR@.L	1.05	2	N	L	0.99	0.98	0	3.5722	10878354	10518968	1.03	0.97	LN2_1E1_LTQ	9971	3	0.98	13.34	-	-	-	LSGSGPAELS(p)AGEDEEEESELVSK()PLLR()
IPI00747804	ARHGAP9	R.LSGSGPAELS#AGEDEEEESELVSKPLLR.L	1.01	2	N	L	1	0.99	0	4.9595	7387116	7241700	1.02	0.95	LN2_1E1_MSA	9034	3	0.98	18.99	-	-	-	LSGSGPAELS(p)AGEDEEEESELVSKPLLR
IPI00747804	ARHGAP9	R.LSGSGPAELS#AGEDEEEESELVSKPLLR.L	1.05	2	N	L	0.99	0.98	0	3.9942	10878354	10518968	1.03	0.97	LN2_1E1_LTQ	9987	3	0.98	8.68	-	-	-	LSGSGPAELS(p)AGEDEEEESELVSKPLLR
IPI00747804	ARHGAP9	R.LSGSGPAELS#AGEDEEEESELVSKPLLR.L	0.70922	3	N	H	0.98	0.96	0	4.6277	5691041	4273861	1.33	0.97	HN3_1E1_MSA	9476	3	0.98	26.43	-	-	-	LSGSGPAELS(p)AGEDEEEESELVSKPLLR
IPI00442053	ARHGAP9	R.LSGSGPAELS#AGEDEEEESELVSK^PLLR@.L	0.96	3	N	L	0.99	0.98	0	4.2532	4825842	5303884	0.91	0.98	LN3_1E1_MSA	9101	3	0.98	37.59	-	-	-	LSGSGPAELS(p)AGEDEEEESELVSK()PLLR()
IPI00747804	ARHGAP9	R.LSGSGPAELS#AGEDEEEESELVSK^PLLR@.L	0.97	3	N	L	0.99	0.99	0	3.3689	6885035	7429347	0.93	0.96	LN3_1E1_LTQ	10524	3	0.98	6.8	-	-	-	LSGSGPAELS(p)AGEDEEEESELVSK()PLLR()
IPI00442053	ARHGAP9	R.LSGSGPAELS#AGEDEEEESELVSKPLLR.L	0.96	3	N	L	0.99	0.98	0	5.1953	4825842	5303884	0.91	0.98	LN3_1E1_MSA	9073	3	0.98	36.72	-	-	-	LSGSGPAELS(p)AGEDEEEESELVSKPLLR
IPI00747804	ARHGAP9	R.LSGSGPAELS#AGEDEEEESELVSKPLLR.L	0.97	3	N	L	0.99	0.99	0	3.4211	6885035	7429347	0.93	0.96	LN3_1E1_LTQ	10529	3	0.98	20.39	-	-	-	LSGSGPAELS(p)AGEDEEEESELVSKPLLR
IPI00747804	ARHGAP9	R.LSGSGPAELS#AGEDEEEESELVSKPLLR.L	0.555556	4	N	H	0.99	0.99	0	4.2774	23565796	14598016	1.61	0.99	HN4_1E1_LTQ	10890	3	0.98	20.27	-	-	-	LSGSGPAELS(p)AGEDEEEESELVSKPLLR
IPI00747804	ARHGAP9	R.LSGSGPAELS#AGEDEEEESELVSKPLLR.L	0.574713	4	N	H	0.99	0.98	0	4.0011	20921360	12905640	1.62	1	HN4_1E1_MSA	8619	3	0.98	37.76	-	-	-	LSGSGPAELS(p)AGEDEEEESELVSKPLLR
IPI00747804	ARHGAP9	R.LSGSGPAELS#AGEDEEEESELVSK^PLLR@.L	0.75	4	N	L	0.99	0.98	0	3.6489	3607689	4767708	0.76	0.97	LN4_1E1_MSA	8360	3	0.98	25.27	-	-	-	LSGSGPAELS(p)AGEDEEEESELVSK()PLLR()
IPI00747804	ARHGAP9	R.LSGSGPAELS#AGEDEEEESELVSKPLLR.L	0.7	4	N	L	0.99	0.97	0	3.1792	4432646	6334351	0.7	0.98	LN4_1E1_LTQ	9661	3	0.98	8.58	-	-	-	LSGSGPAELS(p)AGEDEEEESELVSKPLLR
IPI00414939	ARHGAP9	R.LSGSGPAELS#AGEDEEEESELVSKPLLR.L	0.75	4	N	L	0.99	0.98	0	3.6496	3607689	4767708	0.76	0.97	LN4_1E1_MSA	8326	3	0.98	10.2	-	-	-	LSGSGPAELS(p)AGEDEEEESELVSKPLLR
IPI00747804	ARHGAP9	R.LSGSGPAELS#AGEDEEEESELVSKPLLR.L	0.75	4	N	L	0.99	0.98	0	4.0192	3607689	4767708	0.76	0.97	LN4_1E1_MSA	8376	3	0.98	11.2	-	-	-	LSGSGPAELS(p)AGEDEEEESELVSKPLLR
IPI00747804	ARHGAP9	R.LSGSGPAELS#AGEDEEEESELVSKPLLR.L	0.675676	5	N	H	0.99	0.98	0	3.3195	3830273	2937891	1.3	0.75	HN5_1E1_LTQ	7169	3	0.98	23.3	-	-	-	LSGSGPAELS(p)AGEDEEEESELVSKPLLR
IPI00909033	ARHGEF15	R.LS#LLS#NHQGRPT#HRLLQA.S	1.70699	2	N	L	-1	0	1	3.0727	648482	379898	1.71	0.9	LN2_1E1_MSA	6860	3	0.98	0	-	-	-	LS(p)LLS(p)NHQGRPT(p)HRLLQA
IPI00472891	ARID1A	R.GPS#PSPVGSPASVAQSR.S	0.78125	0	N	H	0.99	0.98	0	3.0549	4214994	3439588	1.23	0.97	HN0_1E1_MSA	4856	2	0.98	30.39	-	-	-	GPS(p)PSPVGSPASVAQSR
IPI00643722	ARID1A	R.GPS#PSPVGSPASVAQSR.S	0.78125	0	N	H	0.99	0.98	0	3.3688	4214994	3439588	1.23	0.97	HN0_1E1_MSA	4917	2	0.98	16.08	-	-	-	GPS(p)PSPVGSPASVAQSR
IPI00472891	ARID1A	R.GPS#PSPVGSPASVAQSR.S	0.833333	0	N	H	0.99	0.98	0	2.8331	3403546	3092203	1.1	0.99	HN0_1E1_LTQ	5418	2	0.98	18.45	-	-	-	GPS(p)PSPVGSPASVAQSR
IPI00643722	ARID1A	R.GPS#PSPVGSPASVAQSR.S	0.833333	0	N	H	0.99	0.98	0	3.2255	3403546	3092203	1.1	0.99	HN0_1E1_LTQ	5489	2	0.98	25.66	-	-	-	GPS(p)PSPVGSPASVAQSR
IPI00472891	ARID1A	R.GPS#PSPVGSPASVAQSR@.S	0.78125	0	N	H	0.99	0.98	0	3.7665	4214994	3439588	1.23	0.97	HN0_1E1_MSA	4927	2	0.98	33.13	-	-	-	GPS(p)PSPVGSPASVAQSR()
IPI00643722	ARID1A	R.GPS#PSPVGSPASVAQSR@.S	0.78125	0	N	H	0.99	0.98	0	3.7665	4214994	3439588	1.23	0.97	HN0_1E1_MSA	4927	2	0.98	33.13	-	-	-	GPS(p)PSPVGSPASVAQSR()
IPI00643722	ARID1A	R.GPS#PSPVGSPASVAQSR@.S	0.833333	0	N	H	0.99	0.98	0	3.1678	3403546	3092203	1.1	0.99	HN0_1E1_LTQ	5490	2	0.98	28.65	-	-	-	GPS(p)PSPVGSPASVAQSR()
IPI00643722	ARID1A	R.GPS#PSPVGSPASVAQSR.S	1.1236	2	N	H	0.98	0.96	0	3.1557	1728857	1862623	0.93	0.97	HN2_1E1_LTQ	6186	2	0.98	12	-	-	-	GPS(p)PSPVGSPASVAQSR
IPI00643722	ARID1A	R.GPS#PSPVGSPASVAQSR.S	1.16279	2	N	H	0.95	0.9	0	3.3072	904096	967149	0.93	0.96	HN2_1E1_MSA	5417	2	0.98	19.27	-	-	-	GPS(p)PSPVGSPASVAQSR
IPI00472891	ARID1A	R.GPS#PSPVGSPASVAQSR.S	1.16279	2	N	H	0.95	0.9	0	3.001	904096	967149	0.93	0.96	HN2_1E1_MSA	5471	2	0.98	31.34	-	-	-	GPS(p)PSPVGSPASVAQSR
IPI00643722	ARID1A	R.GPS#PSPVGSPASVAQSR@.S	1.1236	2	N	H	0.98	0.96	0	3.1586	1728857	1862623	0.93	0.97	HN2_1E1_LTQ	6118	2	0.98	16.65	-	-	-	GPS(p)PSPVGSPASVAQSR()
IPI00643722	ARID1A	R.GPS#PSPVGSPASVAQSR@.S	1.16279	2	N	H	0.95	0.9	0	3.8374	904096	967149	0.93	0.96	HN2_1E1_MSA	5423	2	0.98	27.3	-	-	-	GPS(p)PSPVGSPASVAQSR()
IPI00643722	ARID1A	R.GPS#PSPVGSPASVAQSR.S	1.34	2	N	L	0.98	0.95	0	4.2193	1169732	881763	1.33	0.99	LN2_1E1_MSA	5150	2	0.98	15.24	-	-	-	GPS(p)PSPVGSPASVAQSR
IPI00643722	ARID1A	R.GPS#PSPVGSPASVAQSR@.S	1.34	2	N	L	0.98	0.95	0	3.6065	1169732	881763	1.33	0.99	LN2_1E1_MSA	5152	2	0.98	22.85	-	-	-	GPS(p)PSPVGSPASVAQSR()
IPI00643722	ARID1A	R.GPS#PSPVGSPASVAQSR.S	0.328947	3	N	H	0.93	0.86	1.31006e-14	3.4252	4295099	1620273	2.65	0.99	HN3_1E1_MSA	5410	2	0.98	27.58	-	-	-	GPS(p)PSPVGSPASVAQSR
IPI00642705	ARID1A	R.GPS#PSPVGSPASVAQSR.S	0.364964	3	N	H	0.89	0.8	1.22125e-15	3.2201	9607180	3781631	2.54	1	HN3_1E1_LTQ	6532	2	0.98	5.56	-	-	-	GPS(p)PSPVGSPASVAQSR
IPI00472891	ARID1A	R.GPS#PSPVGSPASVAQSR@.S	0.328947	3	N	H	0.93	0.86	1.31006e-14	3.4355	4295099	1620273	2.65	0.99	HN3_1E1_MSA	5394	2	0.98	29.89	-	-	-	GPS(p)PSPVGSPASVAQSR()
IPI00643722	ARID1A	R.GPS#PSPVGSPASVAQSR@.S	0.328947	3	N	H	0.93	0.86	1.31006e-14	3.5109	4295099	1620273	2.65	0.99	HN3_1E1_MSA	5470	2	0.98	17.29	-	-	-	GPS(p)PSPVGSPASVAQSR()
IPI00643722	ARID1A	R.GPS#PSPVGSPASVAQSR.S	0.44	3	N	L	0.98	0.97	0	3.4442	935626	2056471	0.45	0.99	LN3_1E1_MSA	5236	2	0.98	28.81	-	-	-	GPS(p)PSPVGSPASVAQSR
IPI00643722	ARID1A	R.GPS#PSPVGSPASVAQSR.S	0.46	3	N	L	0.99	0.97	0	2.5304	1709528	3539447	0.48	0.99	LN3_1E1_LTQ	6022	2	0.98	29.18	-	-	-	GPS(p)PSPVGSPASVAQSR
IPI00643722	ARID1A	R.GPS#PSPVGSPASVAQSR@.S	0.44	3	N	L	0.98	0.97	0	4.0683	935626	2056471	0.45	0.99	LN3_1E1_MSA	5214	2	0.98	17.56	-	-	-	GPS(p)PSPVGSPASVAQSR()
IPI00643722	ARID1A	R.GPS#PSPVGSPASVAQSR@.S	0.46	3	N	L	0.99	0.97	0	3.2241	1709528	3539447	0.48	0.99	LN3_1E1_LTQ	6032	2	0.98	22.12	-	-	-	GPS(p)PSPVGSPASVAQSR()
IPI00642705	ARID1A	R.GPS#PSPVGSPASVAQSR.S	0.221239	4	N	H	0.97	0.94	0	2.9825	11590403	2869291	4.04	0.99	HN4_1E1_LTQ	6362	2	0.98	29.59	-	-	-	GPS(p)PSPVGSPASVAQSR
IPI00643722	ARID1A	R.GPS#PSPVGSPASVAQSR.S	0.23753	4	N	H	0.93	0.87	2.24758e-09	3.5421	6501090	1946779	3.34	1	HN4_1E1_MSA	4869	2	0.98	12	-	-	-	GPS(p)PSPVGSPASVAQSR
IPI00472891	ARID1A	R.GPS#PSPVGSPASVAQSR.S	0.24	4	N	L	0.98	0.96	0	2.5924	1081866	4261895	0.25	0.99	LN4_1E1_LTQ	5569	2	0.98	13.23	-	-	-	GPS(p)PSPVGSPASVAQSR
IPI00643722	ARID1A	R.GPS#PSPVGSPASVAQSR.S	0.24	4	N	L	0.98	0.96	0	2.5924	1081866	4261895	0.25	0.99	LN4_1E1_LTQ	5569	2	0.98	13.23	-	-	-	GPS(p)PSPVGSPASVAQSR
IPI00643722	ARID1A	R.GPS#PSPVGSPASVAQSR.S	0.25	4	N	L	0.99	0.97	0	3.0316	786487	3140532	0.25	0.99	LN4_1E1_MSA	4766	2	0.98	12	-	-	-	GPS(p)PSPVGSPASVAQSR
IPI00472891	ARID1A	R.GPS#PSPVGSPASVAQSR@.S	0.24	4	N	L	0.98	0.96	0	3.2356	1081866	4261895	0.25	0.99	LN4_1E1_LTQ	5575	2	0.98	20.7	-	-	-	GPS(p)PSPVGSPASVAQSR()
IPI00643722	ARID1A	R.GPS#PSPVGSPASVAQSR@.S	0.24	4	N	L	0.98	0.96	0	3.3301	1081866	4261895	0.25	0.99	LN4_1E1_LTQ	5644	2	0.98	27.58	-	-	-	GPS(p)PSPVGSPASVAQSR()
IPI00643722	ARID1A	R.GPS#PSPVGSPASVAQSR@.S	0.25	4	N	L	0.99	0.97	0	3.4278	786487	3140532	0.25	0.99	LN4_1E1_MSA	4773	2	0.98	27.58	-	-	-	GPS(p)PSPVGSPASVAQSR()
IPI00472891	ARID1A	R.GPS#PSPVGSPASVAQSR@.S	0.25	4	N	L	0.99	0.97	0	3.1908	786487	3140532	0.25	0.99	LN4_1E1_MSA	4827	2	0.98	16.65	-	-	-	GPS(p)PSPVGSPASVAQSR()
IPI00642705	ARID1A	R.GPS#PSPVGSPASVAQSR.S	0.236407	5	N	H	0.97	0.94	0	3.2697	9218728	2078736	4.43	0.98	HN5_1E1_LTQ	3842	2	0.98	29.18	-	-	-	GPS(p)PSPVGSPASVAQSR
IPI00643722	ARID1A	R.GPS#PSPVGSPASVAQSR.S	0.243309	5	N	H	0.98	0.95	0	3.3793	7490558	1794462	4.17	0.99	HN5_1E1_MSA	3539	2	0.98	24.34	-	-	-	GPS(p)PSPVGSPASVAQSR
IPI00642705	ARID1A	R.GPS#PSPVGSPASVAQSR@.S	0.236407	5	N	H	0.97	0.94	0	2.8629	9218728	2078736	4.43	0.98	HN5_1E1_LTQ	3898	2	0.98	28.17	-	-	-	GPS(p)PSPVGSPASVAQSR()
IPI00643722	ARID1A	R.GPS#PSPVGSPASVAQSR@.S	0.243309	5	N	H	0.98	0.95	0	3.0833	7490558	1794462	4.17	0.99	HN5_1E1_MSA	3553	2	0.98	17.23	-	-	-	GPS(p)PSPVGSPASVAQSR()
IPI00643722	ARID1A	R.GPS#PSPVGSPASVAQSR.S	0.28	5	N	L	0.98	0.95	0	2.9138	2971870	10520620	0.28	0.99	LN5_1E1_LTQ	3798	2	0.98	10.1	-	-	-	GPS(p)PSPVGSPASVAQSR
IPI00643722	ARID1A	R.GPS#PSPVGSPASVAQSR.S	0.28	5	N	L	0.98	0.97	0	3.0461	1878284	6626837	0.28	0.99	LN5_1E1_MSA	3569	2	0.98	30.14	-	-	-	GPS(p)PSPVGSPASVAQSR
IPI00643722	ARID1A	R.GPS#PSPVGSPASVAQSR.S	0.3	5	N	L	0.88	0.77	0	2.9529	259991	832181	0.31	0.97	LN5_2E1_MSA	2173	2	0.98	17.33	-	-	-	GPS(p)PSPVGSPASVAQSR
IPI00643722	ARID1A	R.GPS#PSPVGSPASVAQSR@.S	0.28	5	N	L	0.98	0.95	0	3.6839	2971870	10520620	0.28	0.99	LN5_1E1_LTQ	3791	2	0.98	18.07	-	-	-	GPS(p)PSPVGSPASVAQSR()
IPI00472891	ARID1A	R.GPS#PSPVGSPASVAQSR@.S	0.28	5	N	L	0.98	0.95	0	3.1163	2971870	10520620	0.28	0.99	LN5_1E1_LTQ	3852	2	0.98	7.9	-	-	-	GPS(p)PSPVGSPASVAQSR()
IPI00472891	ARID1A	R.GPS#PSPVGSPASVAQSR@.S	0.28	5	N	L	0.98	0.97	0	3.508	1878284	6626837	0.28	0.99	LN5_1E1_MSA	3500	2	0.98	14.3	-	-	-	GPS(p)PSPVGSPASVAQSR()
IPI00643722	ARID1A	R.GPS#PSPVGSPASVAQSR@.S	0.28	5	N	L	0.98	0.97	0	3.6223	1878284	6626837	0.28	0.99	LN5_1E1_MSA	3552	2	0.98	29.59	-	-	-	GPS(p)PSPVGSPASVAQSR()
IPI00643722	ARID1A	R.GPS#PSPVGSPASVAQSR@.S	0.3	5	N	L	0.88	0.77	0	3.119	259991	832181	0.31	0.97	LN5_2E1_MSA	2191	2	0.98	20.87	-	-	-	GPS(p)PSPVGSPASVAQSR()
IPI00642705	ARID1A	R.GPS#PSPVGSPASVAQSR@.S	0.36	5	N	L	0.94	0.88	0	3.2908	276984	879677	0.31	0.98	LN5_2E1_LTQ	2445	2	0.98	25.66	-	-	-	GPS(p)PSPVGSPASVAQSR()
IPI00643722	ARID1A	R.SHHAPM*S#PGSSGGGGQPLAR.T	0.469484	4	N	H	0.72	0.52	2.74121e-10	3.0994	814413	246770	3.3	0.9	HN4_1E1_MSA	2405	3	0.98	22.04	-	-	-	SHHAPM()S(p)PGSSGGGGQPLAR
IPI00643722	ARID1A	R.SHHAPM*S#PGSSGGGGQPLAR.T	0.364964	5	N	H	0.89	0.79	2.16957e-09	3.6613	892215	294683	3.03	0.97	HN5_9E1_LTQ	2390	3	0.98	15.88	-	-	-	SHHAPM()S(p)PGSSGGGGQPLAR
IPI00434966	ARL6IP4	R.S#AGEEEDGPVLTDEQK.S	0.757576	0	N	H	0.99	0.99	0	3.2609	1161061	938923	1.24	0.99	HN0_1E1_LTQ	5311	2	0.98	50.96	-	-	-	S(p)AGEEEDGPVLTDEQK
IPI00434966	ARL6IP4	R.S#AGEEEDGPVLTDEQK.S	0.769231	0	N	H	0.98	0.96	0	3.483	1614535	1188145	1.36	0.98	HN0_1E1_MSA	4791	2	0.98	77.3	-	-	-	S(p)AGEEEDGPVLTDEQK
IPI00434966	ARL6IP4	R.S#AGEEEDGPVLTDEQK^.S	0.757576	0	N	H	0.99	0.99	0	3.4829	1161061	938923	1.24	0.99	HN0_1E1_LTQ	5375	2	0.98	61.57	-	-	-	S(p)AGEEEDGPVLTDEQK()
IPI00434966	ARL6IP4	R.S#AGEEEDGPVLTDEQK^.S	0.769231	0	N	H	0.98	0.96	0	3.7464	1614535	1188145	1.36	0.98	HN0_1E1_MSA	4793	2	0.98	77.8	-	-	-	S(p)AGEEEDGPVLTDEQK()
IPI00434966	ARL6IP4	R.S#AGEEEDGPVLTDEQK.S	0.625	2	N	H	0.96	0.93	2.22045e-16	2.7319	1588141	1100444	1.44	0.98	HN2_1E1_LTQ	5937	2	0.98	48.63	-	-	-	S(p)AGEEEDGPVLTDEQK
IPI00434966	ARL6IP4	R.S#AGEEEDGPVLTDEQK.S	0.645161	2	N	H	0.97	0.94	1.13243e-14	3.0284	837811	574756	1.46	0.95	HN2_1E1_MSA	5320	2	0.98	61.43	-	-	-	S(p)AGEEEDGPVLTDEQK
IPI00434966	ARL6IP4	R.S#AGEEEDGPVLTDEQK^.S	0.632911	2	N	H	0.96	0.92	0	3.6705	1801441	1237379	1.46	0.92	HN2_1E1_LTQ	5968	2	0.98	69.16	-	-	-	S(p)AGEEEDGPVLTDEQK()
IPI00434966	ARL6IP4	R.S#AGEEEDGPVLTDEQK^.S	0.645161	2	N	H	0.97	0.94	1.13243e-14	3.3627	837811	574756	1.46	0.95	HN2_1E1_MSA	5309	2	0.98	73.65	-	-	-	S(p)AGEEEDGPVLTDEQK()
IPI00434966	ARL6IP4	R.S#AGEEEDGPVLTDEQK.S	0.94	2	N	L	0.98	0.97	0	3.0821	1275895	1426638	0.89	0.96	LN2_1E1_LTQ	5475	2	0.98	66.26	-	-	-	S(p)AGEEEDGPVLTDEQK
IPI00434966	ARL6IP4	R.S#AGEEEDGPVLTDEQK.S	0.94	2	N	L	0.97	0.93	1.48248e-11	3.5226	744379	868775	0.86	0.96	LN2_1E1_MSA	5064	2	0.98	73.04	-	-	-	S(p)AGEEEDGPVLTDEQK
IPI00434966	ARL6IP4	R.S#AGEEEDGPVLTDEQK^.S	0.94	2	N	L	0.98	0.97	0	3.2993	1275895	1426638	0.89	0.96	LN2_1E1_LTQ	5458	2	0.98	46.24	-	-	-	S(p)AGEEEDGPVLTDEQK()
IPI00434966	ARL6IP4	R.S#AGEEEDGPVLTDEQK^.S	0.94	2	N	L	0.97	0.93	1.48248e-11	3.3286	744379	868775	0.86	0.96	LN2_1E1_MSA	5063	2	0.98	67	-	-	-	S(p)AGEEEDGPVLTDEQK()
IPI00434966	ARL6IP4	R.S#AGEEEDGPVLTDEQK.S	0.529101	3	N	H	0.96	0.93	3.9968e-14	3.9424	1426827	868861	1.64	0.98	HN3_1E1_MSA	5201	2	0.98	74.83	-	-	-	S(p)AGEEEDGPVLTDEQK
IPI00434966	ARL6IP4	R.S#AGEEEDGPVLTDEQK.S	0.591716	3	N	H	0.97	0.94	0	3.3341	3097003	1846599	1.68	0.98	HN3_1E1_LTQ	6377	2	0.98	40.89	-	-	-	S(p)AGEEEDGPVLTDEQK
IPI00434966	ARL6IP4	R.S#AGEEEDGPVLTDEQK^.S	0.529101	3	N	H	0.96	0.93	3.9968e-14	3.5738	1426827	868861	1.64	0.98	HN3_1E1_MSA	5264	2	0.98	44.2	-	-	-	S(p)AGEEEDGPVLTDEQK()
IPI00434966	ARL6IP4	R.S#AGEEEDGPVLTDEQK^.S	0.591716	3	N	H	0.97	0.94	0	3.5202	3097003	1846599	1.68	0.98	HN3_1E1_LTQ	6441	2	0.98	80.72	-	-	-	S(p)AGEEEDGPVLTDEQK()
IPI00434966	ARL6IP4	R.S#AGEEEDGPVLTDEQK.S	0.77	3	N	L	0.98	0.97	0	3.2332	1171347	1564565	0.75	0.96	LN3_1E1_LTQ	5900	2	0.98	71.58	-	-	-	S(p)AGEEEDGPVLTDEQK
IPI00434966	ARL6IP4	R.S#AGEEEDGPVLTDEQK^.S	0.76	3	N	L	0.98	0.96	2.59903e-13	4.0663	586290	813757	0.72	0.98	LN3_1E1_MSA	5180	2	0.98	73.53	-	-	-	S(p)AGEEEDGPVLTDEQK()
IPI00434966	ARL6IP4	R.S#AGEEEDGPVLTDEQK^.S	0.77	3	N	L	0.98	0.97	0	3.8134	1171347	1564565	0.75	0.96	LN3_1E1_LTQ	5922	2	0.98	76.2	-	-	-	S(p)AGEEEDGPVLTDEQK()
IPI00434966	ARL6IP4	R.S#AGEEEDGPVLTDEQK.S	0.243309	4	N	H	0.89	0.8	1.45536e-08	3.3903	2159250	755375	2.86	0.99	HN4_1E1_MSA	4735	2	0.98	81.03	-	-	-	S(p)AGEEEDGPVLTDEQK
IPI00434966	ARL6IP4	R.S#AGEEEDGPVLTDEQK.S	0.265252	4	N	H	0.97	0.94	0	3.5315	3804700	1133108	3.36	0.93	HN4_1E1_LTQ	6231	2	0.98	74.36	-	-	-	S(p)AGEEEDGPVLTDEQK
IPI00434966	ARL6IP4	R.S#AGEEEDGPVLTDEQK.S	0.32	4	N	L	0.96	0.92	0	2.686	330019	1059439	0.31	0.96	LN4_1E1_MSA	4722	2	0.98	23.99	-	-	-	S(p)AGEEEDGPVLTDEQK
IPI00434965	ARL6IP4	R.S#AGEEEDGPVLTDEQK^.S	0.32	4	N	L	0.97	0.95	0	3.9057	537843	1686644	0.32	0.97	LN4_1E1_LTQ	5439	2	0.98	62.71	-	-	-	S(p)AGEEEDGPVLTDEQK()
IPI00434966	ARL6IP4	R.S#AGEEEDGPVLTDEQK^.S	0.32	4	N	L	0.96	0.92	0	3.396	330019	1059439	0.31	0.96	LN4_1E1_MSA	4712	2	0.98	72.42	-	-	-	S(p)AGEEEDGPVLTDEQK()
IPI00434966	ARL6IP4	R.S#AGEEEDGPVLTDEQK.S	0.364964	5	N	H	0.98	0.97	0	3.5966	7671409	2881012	2.66	0.98	HN5_1E1_LTQ	3803	2	0.98	79.07	-	-	-	S(p)AGEEEDGPVLTDEQK
IPI00434966	ARL6IP4	R.S#AGEEEDGPVLTDEQK.S	0.369004	5	N	H	0.99	0.98	0	3.4568	6056786	2309547	2.62	0.99	HN5_1E1_MSA	3435	2	0.98	76.36	-	-	-	S(p)AGEEEDGPVLTDEQK
IPI00434966	ARL6IP4	R.S#AGEEEDGPVLTDEQK^.S	0.364964	5	N	H	0.98	0.97	0	3.6435	7671409	2881012	2.66	0.98	HN5_1E1_LTQ	3767	2	0.98	57.66	-	-	-	S(p)AGEEEDGPVLTDEQK()
IPI00434966	ARL6IP4	R.S#AGEEEDGPVLTDEQK^.S	0.369004	5	N	H	0.99	0.98	0	4.1737	6056786	2309547	2.62	0.99	HN5_1E1_MSA	3438	2	0.98	54.52	-	-	-	S(p)AGEEEDGPVLTDEQK()
IPI00434966	ARL6IP4	R.S#AGEEEDGPVLTDEQK.S	0.43	5	N	L	0.99	0.98	0	3.3584	4001788	8443706	0.47	0.99	LN5_1E1_LTQ	3739	2	0.98	76.03	-	-	-	S(p)AGEEEDGPVLTDEQK
IPI00434966	ARL6IP4	R.S#AGEEEDGPVLTDEQK.S	0.49	5	N	L	0.99	0.98	0	3.5717	2221603	4488082	0.5	0.99	LN5_1E1_MSA	3514	2	0.98	65.14	-	-	-	S(p)AGEEEDGPVLTDEQK
IPI00434966	ARL6IP4	R.S#AGEEEDGPVLTDEQK^.S	0.43	5	N	L	0.99	0.98	0	3.6112	4001788	8443706	0.47	0.99	LN5_1E1_LTQ	3789	2	0.98	74.62	-	-	-	S(p)AGEEEDGPVLTDEQK()
IPI00434966	ARL6IP4	R.S#AGEEEDGPVLTDEQK^.S	0.49	5	N	L	0.99	0.98	0	3.4211	2221603	4488082	0.5	0.99	LN5_1E1_MSA	3465	2	0.98	75.94	-	-	-	S(p)AGEEEDGPVLTDEQK()
IPI00420025	ARMC10	K.S#AEDLTDGSYDDVLNAEQLQK^.L	0.33	4	N	L	0.98	0.95	0	3.563	1939006	5490708	0.35	1	LN4_1E1_MSA	8264	2	0.98	6.07	-	-	-	S(p)AEDLTDGSYDDVLNAEQLQK()
IPI00166858	ARRDC1	K.APEATVTLPVFIGNIAVNHAPVS#PR.P	0.793651	2	N	H	0.95	0.9	0	3.7216	3189077	2470086	1.29	0.98	HN2_1E1_LTQ	11932	3	0.98	30.05	-	-	-	APEATVTLPVFIGNIAVNHAPVS(p)PR
IPI00555847	ARRDC1	K.APEATVTLPVFIGNIAVNHAPVS#PR.P	0.793651	2	N	H	0.95	0.9	0	4.4754	3189077	2470086	1.29	0.98	HN2_1E1_LTQ	11965	3	0.98	36.22	-	-	-	APEATVTLPVFIGNIAVNHAPVS(p)PR
IPI00555847	ARRDC1	K.APEATVTLPVFIGNIAVNHAPVS#PR.P	0.862069	2	N	H	0.92	0.84	0	3.5422	2293711	1877299	1.22	0.97	HN2_1E1_MSA	10510	3	0.98	25.07	-	-	-	APEATVTLPVFIGNIAVNHAPVS(p)PR
IPI00555847	ARRDC1	K.APEATVTLPVFIGNIAVNHAPVS#PR@.P	0.793651	2	N	H	0.95	0.9	0	3.8766	3189077	2470086	1.29	0.98	HN2_1E1_LTQ	11949	3	0.98	8.02	-	-	-	APEATVTLPVFIGNIAVNHAPVS(p)PR()
IPI00555847	ARRDC1	K.APEATVTLPVFIGNIAVNHAPVS#PR@.P	0.862069	2	N	H	0.92	0.84	0	3.8925	2293711	1877299	1.22	0.97	HN2_1E1_MSA	10512	3	0.98	3.35	-	-	-	APEATVTLPVFIGNIAVNHAPVS(p)PR()
IPI00555847	ARRDC1	K.APEATVTLPVFIGNIAVNHAPVS#PR.P	0.93	2	N	L	0.94	0.88	0	3.7274	1606441	1576969	1.02	0.96	LN2_1E1_LTQ	11408	3	0.98	17.05	-	-	-	APEATVTLPVFIGNIAVNHAPVS(p)PR
IPI00555847	ARRDC1	K.APEATVTLPVFIGNIAVNHAPVS#PR.P	0.98	2	N	L	0.9	0.81	0	4.0808	1523753	1548705	0.98	0.95	LN2_1E1_MSA	10440	3	0.98	34.15	-	-	-	APEATVTLPVFIGNIAVNHAPVS(p)PR
IPI00555847	ARRDC1	K.APEATVTLPVFIGNIAVNHAPVS#PR@.P	0.93	2	N	L	0.94	0.88	0	3.3537	1606441	1576969	1.02	0.96	LN2_1E1_LTQ	11397	3	0.98	11.87	-	-	-	APEATVTLPVFIGNIAVNHAPVS(p)PR()
IPI00555847	ARRDC1	K.APEATVTLPVFIGNIAVNHAPVS#PR.P	0.694444	3	N	H	0.73	0.53	5.24287e-08	4.683	1526158	871253	1.75	0.92	HN3_1E1_LTQ	13535	3	0.98	32.39	-	-	-	APEATVTLPVFIGNIAVNHAPVS(p)PR
IPI00514937	ARRDC1	K.APEATVTLPVFIGNIAVNHAPVS#PR@.P	0.54	3	N	L	0.88	0.77	9.99201e-16	3.4484	654845	1311767	0.5	0.95	LN3_1E1_MSA	10533	3	0.98	8.09	-	-	-	APEATVTLPVFIGNIAVNHAPVS(p)PR()
IPI00555847	ARRDC1	K.APEATVTLPVFIGNIAVNHAPVS#PR.P	0.322581	4	N	H	0.86	0.74	1.11022e-16	3.4727	2474453	824194	3	0.97	HN4_1E1_MSA	10339	3	0.98	27.43	-	-	-	APEATVTLPVFIGNIAVNHAPVS(p)PR
IPI00555847	ARRDC1	K.APEATVTLPVFIGNIAVNHAPVS#PR.P	0.350877	4	N	H	0.88	0.77	0	3.507	1572063	465282	3.38	0.97	HN4_1E2_MSA	7688	3	0.98	21.47	-	-	-	APEATVTLPVFIGNIAVNHAPVS(p)PR
IPI00555847	ARRDC1	K.APEATVTLPVFIGNIAVNHAPVS#PR.P	0.396825	4	N	H	0.74	0.55	1.24446e-08	4.5354	1735746	489386	3.55	0.94	HN4_1E2_LTQ	8533	3	0.98	37.68	-	-	-	APEATVTLPVFIGNIAVNHAPVS(p)PR
IPI00555847	ARRDC1	K.APEATVTLPVFIGNIAVNHAPVS#PR.P	0.458716	4	N	H	0.84	0.71	1.44329e-15	3.9948	2674282	866731	3.09	0.96	HN4_1E1_LTQ	12541	3	0.98	38.31	-	-	-	APEATVTLPVFIGNIAVNHAPVS(p)PR
IPI00748604	ATF2	K.M*PLDLS#PLATPIIR@.S	1.35135	0	N	H	0.63	0.4	4.84902e-06	2.5128	216963	180760	1.2	0.82	HN0_1E2_LTQ	7118	2	0.98	19.84	-	-	-	M()PLDLS(p)PLATPIIR()
IPI00844572	ATF2	K.M*PLDLS#PLATPIIR.S	0.588235	2	N	H	0.9	0.82	0	3.178	987065	543661	1.82	0.94	HN2_1E1_MSA	10090	2	0.98	29.83	-	-	-	M()PLDLS(p)PLATPIIR
IPI00916330	ATF2	K.M*PLDLS#PLATPIIR.S	0.847458	2	N	H	0.86	0.74	1.9762e-14	2.8865	1107664	657208	1.69	0.92	HN2_1E1_LTQ	11518	2	0.98	20.5	-	-	-	M()PLDLS(p)PLATPIIR
IPI00844572	ATF2	K.M*PLDLS#PLATPIIR@.S	0.588235	2	N	H	0.9	0.82	0	2.8498	987065	543661	1.82	0.94	HN2_1E1_MSA	10068	2	0.98	39.43	-	-	-	M()PLDLS(p)PLATPIIR()
IPI00234446	ATF2	K.M*PLDLS#PLATPIIR@.S	0.588235	2	N	H	0.9	0.82	0	2.8498	987065	543661	1.82	0.94	HN2_1E1_MSA	10068	2	0.98	39.43	-	-	-	M()PLDLS(p)PLATPIIR()
IPI00234446	ATF2	K.M*PLDLS#PLATPIIR.S	0.84	2	N	L	0.78	0.61	1.2809e-11	2.5313	720252	724858	0.99	0.9	LN2_1E1_MSA	9962	2	0.98	20.75	-	-	-	M()PLDLS(p)PLATPIIR
IPI00844572	ATF2	K.M*PLDLS#PLATPIIR.S	0.84	2	N	L	0.78	0.61	1.2809e-11	2.9775	720252	724858	0.99	0.9	LN2_1E1_MSA	9998	2	0.98	31.07	-	-	-	M()PLDLS(p)PLATPIIR
IPI00844572	ATF2	K.M*PLDLS#PLATPIIR@.S	1.88679	3	N	H	0.7	0.49	1.74122e-07	2.6835	572120	692257	0.83	0.82	HN3_1E1_LTQ	12873	2	0.98	26.6	-	-	-	M()PLDLS(p)PLATPIIR()
IPI00844572	ATF2	K.M*PLDLS#PLATPIIR.S	1.1	3	N	L	0.85	0.72	3.4431e-11	2.8044	767144	554034	1.38	0.92	LN3_1E1_MSA	10051	2	0.98	19.21	-	-	-	M()PLDLS(p)PLATPIIR
IPI00844572	ATF2	K.M*PLDLS#PLATPIIR@.S	1.09	3	N	L	0.89	0.79	0	2.7965	911695	657561	1.39	0.95	LN3_1E1_LTQ	11564	2	0.98	25.58	-	-	-	M()PLDLS(p)PLATPIIR()
IPI00844572	ATF2	K.M*PLDLS#PLATPIIR@.S	1.1	3	N	L	0.85	0.72	3.4431e-11	3.4147	767144	554034	1.38	0.92	LN3_1E1_MSA	10064	2	0.98	19.56	-	-	-	M()PLDLS(p)PLATPIIR()
IPI00916330	ATF2	K.M*PLDLS#PLATPIIR.S	0.409836	4	N	H	0.6	0.36	1.41479e-05	2.8899	679911	194881	3.49	0.94	HN4_1E2_LTQ	8167	2	0.98	24.94	-	-	-	M()PLDLS(p)PLATPIIR
IPI00844572	ATF2	K.M*PLDLS#PLATPIIR.S	0.497512	4	N	H	0.62	0.39	4.62145e-06	2.6226	1167980	287147	4.07	0.93	HN4_1E1_LTQ	11978	2	0.98	27.54	-	-	-	M()PLDLS(p)PLATPIIR
IPI00844572	ATF2	K.M*PLDLS#PLATPIIR.S	0.641026	4	N	H	0.51	0.26	0.00110904	2.991	854700	192823	4.43	0.91	HN4_1E1_MSA	9780	2	0.98	22.9	-	-	-	M()PLDLS(p)PLATPIIR
IPI00234446	ATF2	K.MPLDLS#PLATPIIR.S	0.662252	2	N	H	0.94	0.88	0	2.7583	1452675	931606	1.56	0.96	HN2_1E1_MSA	10503	2	0.98	34.55	-	-	-	MPLDLS(p)PLATPIIR
IPI00844572	ATF2	K.MPLDLS#PLATPIIR.S	0.662252	2	N	H	0.94	0.88	0	3.2409	1452675	931606	1.56	0.96	HN2_1E1_MSA	10535	2	0.98	16.6	-	-	-	MPLDLS(p)PLATPIIR
IPI00916330	ATF2	K.MPLDLS#PLATPIIR.S	0.719424	2	N	H	0.96	0.91	0	2.8163	1772187	1168823	1.52	0.98	HN2_1E1_LTQ	11975	2	0.98	25.72	-	-	-	MPLDLS(p)PLATPIIR
IPI00844572	ATF2	K.MPLDLS#PLATPIIR@.S	0.662252	2	N	H	0.94	0.88	0	3.9259	1452675	931606	1.56	0.96	HN2_1E1_MSA	10520	2	0.98	20.93	-	-	-	MPLDLS(p)PLATPIIR()
IPI00916330	ATF2	K.MPLDLS#PLATPIIR@.S	0.719424	2	N	H	0.96	0.91	0	2.8749	1772187	1168823	1.52	0.98	HN2_1E1_LTQ	11959	2	0.98	14.76	-	-	-	MPLDLS(p)PLATPIIR()
IPI00844572	ATF2	K.MPLDLS#PLATPIIR.S	0.84	2	N	L	0.88	0.78	0	2.7298	1051388	1079564	0.97	0.92	LN2_1E1_MSA	10505	2	0.98	17.57	-	-	-	MPLDLS(p)PLATPIIR
IPI00234446	ATF2	K.MPLDLS#PLATPIIR.S	0.84	2	N	L	0.88	0.78	0	2.7298	1051388	1079564	0.97	0.92	LN2_1E1_MSA	10505	2	0.98	17.57	-	-	-	MPLDLS(p)PLATPIIR
IPI00234446	ATF2	K.MPLDLS#PLATPIIR@.S	0.84	2	N	L	0.88	0.78	0	2.8663	1051388	1079564	0.97	0.92	LN2_1E1_MSA	10452	2	0.98	36.43	-	-	-	MPLDLS(p)PLATPIIR()
IPI00844572	ATF2	K.MPLDLS#PLATPIIR@.S	0.84	2	N	L	0.88	0.78	0	3.5658	1051388	1079564	0.97	0.92	LN2_1E1_MSA	10489	2	0.98	25.19	-	-	-	MPLDLS(p)PLATPIIR()
IPI00844572	ATF2	K.MPLDLS#PLATPIIR@.S	0.85	2	N	L	0.93	0.87	0	3.1233	900202	949712	0.95	0.95	LN2_1E1_LTQ	11435	2	0.98	27.3	-	-	-	MPLDLS(p)PLATPIIR()
IPI00844572	ATF2	K.MPLDLS#PLATPIIR.S	1.05263	3	N	H	0.8	0.64	9.6334e-09	2.5652	411379	338535	1.22	0.91	HN3_1E2_LTQ	8957	2	0.98	22.44	-	-	-	MPLDLS(p)PLATPIIR
IPI00916330	ATF2	K.MPLDLS#PLATPIIR.S	1.13636	3	N	H	0.88	0.77	1.11022e-16	2.828	707600	634181	1.12	0.96	HN3_1E1_MSA	11223	2	0.98	24.87	-	-	-	MPLDLS(p)PLATPIIR
IPI00844572	ATF2	K.MPLDLS#PLATPIIR.S	1.14943	3	N	H	0.85	0.72	7.54952e-15	2.5031	905472	858231	1.06	0.91	HN3_1E1_LTQ	13545	2	0.98	31.4	-	-	-	MPLDLS(p)PLATPIIR
IPI00916330	ATF2	K.MPLDLS#PLATPIIR@.S	1.13636	3	N	H	0.88	0.77	1.11022e-16	3.2286	707600	634181	1.12	0.96	HN3_1E1_MSA	11252	2	0.98	26.06	-	-	-	MPLDLS(p)PLATPIIR()
IPI00844572	ATF2	K.MPLDLS#PLATPIIR@.S	1.14943	3	N	H	0.85	0.72	7.54952e-15	2.6206	905472	858231	1.06	0.91	HN3_1E1_LTQ	13536	2	0.98	23.71	-	-	-	MPLDLS(p)PLATPIIR()
IPI00844572	ATF2	K.MPLDLS#PLATPIIR.S	1.17	3	N	L	0.94	0.88	0	2.6842	1131749	866601	1.31	0.98	LN3_1E1_MSA	10554	2	0.98	12.55	-	-	-	MPLDLS(p)PLATPIIR
IPI00844572	ATF2	K.MPLDLS#PLATPIIR.S	1.31	3	N	L	0.95	0.9	0	2.9994	1253190	962607	1.3	0.97	LN3_1E1_LTQ	12119	2	0.98	15.93	-	-	-	MPLDLS(p)PLATPIIR
IPI00844572	ATF2	K.MPLDLS#PLATPIIR@.S	1.17	3	N	L	0.94	0.88	0	2.9292	1131749	866601	1.31	0.98	LN3_1E1_MSA	10560	2	0.98	14	-	-	-	MPLDLS(p)PLATPIIR()
IPI00844572	ATF2	K.MPLDLS#PLATPIIR.S	0.347222	4	N	H	0.88	0.77	2.9976e-15	3.3884	1489628	370526	4.02	0.98	HN4_1E1_MSA	10396	2	0.98	28.33	-	-	-	MPLDLS(p)PLATPIIR
IPI00916330	ATF2	K.MPLDLS#PLATPIIR.S	0.361011	4	N	H	0.83	0.7	3.44169e-15	2.9343	995222	251185	3.96	0.97	HN4_1E2_LTQ	8561	2	0.98	31.06	-	-	-	MPLDLS(p)PLATPIIR
IPI00748604	ATF2	K.MPLDLS#PLATPIIR.S	0.371747	4	N	H	0.86	0.74	8.88178e-16	3.1212	975268	260756	3.74	0.98	HN4_1E2_MSA	7723	2	0.98	24.48	-	-	-	MPLDLS(p)PLATPIIR
IPI00844572	ATF2	K.MPLDLS#PLATPIIR.S	0.436681	4	N	H	0.83	0.7	1.88738e-15	3.2045	1575937	488528	3.23	0.96	HN4_1E1_LTQ	12649	2	0.98	28.26	-	-	-	MPLDLS(p)PLATPIIR
IPI00916330	ATF2	R.NDSVIVADQT#PT#PTR.F	0.934579	3	N	H	0.81	0.66	4.31647e-09	3.1984	639457	388291	1.65	0.76	HN3_1E1_MSA	5324	2	0.98	28.33	17.29	-	-	NDSVIVADQT(p)PT(p)PTR
IPI00916330	ATF2	R.NDSVIVADQT#PT#PTR@.F	0.36	4	N	L	0.88	0.77	1.59817e-12	3.0118	297997	717937	0.42	0.9	LN4_1E1_LTQ	5395	2	0.98	17.85	6.4	-	-	NDSVIVADQT(p)PT(p)PTR()
IPI00916330	ATF2	R.NDSVIVADQTPT#PTR@.F	1	2	N	H	0.92	0.84	4.32321e-13	2.9785	429711	420786	1.02	0.98	HN2_1E1_LTQ	6216	2	0.98	3.29	-	-	-	NDSVIVADQTPT(p)PTR()
IPI00916330	ATF2	R.NDSVIVADQTPT#PTR.F	1.05263	4	N	H	0.51	0.26	0.0170524	3.0824	213236	49903	4.27	0.81	HN4_1E2_LTQ	3883	2	0.98	15.24	-	-	-	NDSVIVADQTPT(p)PTR
IPI00015147	ATF7	K.ESSEPTGS#PAPVIQHSSATAPSNGLSVR@.S	0.37	3	N	L	0.96	0.91	2.33147e-15	3.1946	371358	940559	0.39	0.88	LN3_1E1_MSA	6314	3	0.98	6.91	-	-	-	ESSEPTGS(p)PAPVIQHSSATAPSNGLSVR()
IPI00795654	ATF7IP	R.HEHPPNPPVS#PGK^.T	0.793651	0	N	H	0.87	0.76	7.36044e-07	3.0256	243263	211010	1.15	0.95	HN0_1E2_MSA	2654	3	0.98	0	-	-	-	HEHPPNPPVS(p)PGK()
IPI00795654	ATF7IP	R.HEHPPNPPVS#PGK^.T	0.909091	0	N	H	0.84	0.71	7.93268e-08	3.1004	357595	275057	1.3	0.91	HN0_1E1_MSA	3916	3	0.98	0	-	-	-	HEHPPNPPVS(p)PGK()
IPI00795654	ATF7IP	R.HEHPPNPPVS#PGK.T	0.78	3	N	L	0.97	0.94	8.18664e-09	3.01	241048	386577	0.62	0.88	LN3_1E1_MSA	4759	3	0.98	0	-	-	-	HEHPPNPPVS(p)PGK
IPI00795654	ATF7IP	R.HEHPPNPPVS#PGK.T	0.684932	4	N	H	0.61	0.37	0.000176499	3.1979	422225	143631	2.94	0.77	HN4_1E1_MSA	4190	3	0.98	0	-	-	-	HEHPPNPPVS(p)PGK
IPI00795654	ATF7IP	R.HEHPPNPPVS#PGK^.T	0.49	4	N	L	0.86	0.73	2.53445e-09	3.0985	98373	232949	0.42	0.77	LN4_1E2_MSA	2414	3	0.98	0	-	-	-	HEHPPNPPVS(p)PGK()
IPI00795654	ATF7IP	R.HEHPPNPPVS#PGK^.T	0.393701	5	N	H	0.92	0.85	1.9984e-15	3.0651	1578309	703338	2.24	0.91	HN5_9E1_LTQ	2528	3	0.98	0	-	-	-	HEHPPNPPVS(p)PGK()
IPI00419957	ATP2C1	K.NGSVVAM*T#GDGVNDAVALKAADIGVAM*GQT#GTDVC.K	16.6667	3	N	H	0.1	0.01	0.112924	3.3435	9749258	8345892	1.17	0.21	HN3_1E1_LTQ	13285	3	0.98	15.95	0.87	-	-	NGSVVAM()T(p)GDGVNDAVALKAADIGVAM()GQT(p)GTDVC()
IPI00162735	ATRN	K.GDECQLCEVENRY#QGNPLRGT#CYYTLL.I	3.7037	4	N	H	0.16	0.03	0.0410754	3.2402	62126078	16751725	3.71	0.5	HN4_1E1_LTQ	12202	3	0.98	25.88	2.58	-	-	GDEC()QLC()EVENRY(p)QGNPLRGT(p)C()YYTLL
IPI00946543	AURKB	Q.KVM*ENSSGTPDILT#R.R	0.0555927	3	N	H	-1	0	1	2.7304	593441	32991	17.99	0.94	HN3_1E6_LTQ	6189	2	0.98	1.64	-	-	-	KVM()ENSSGTPDILT(p)R
IPI00412415	BAZ1A	K.ELDQDM*VT#EDEDDPGSHKR.G	1.11111	2	N	H	0.98	0.96	5.55112e-16	3.5049	195703	286966	0.68	0.73	HN2_1E1_MSA	4629	3	0.98	54.34	-	-	-	ELDQDM()VT(p)EDEDDPGSHKR
IPI00412415	BAZ1A	K.ELDQDM*VT#EDEDDPGSHK^R@.G	0.970874	3	N	H	0.98	0.96	2.06501e-13	4.1766	820295	863433	0.95	0.93	HN3_1E1_MSA	4519	3	0.98	51.94	-	-	-	ELDQDM()VT(p)EDEDDPGSHK()R()
IPI00412415	BAZ1A	K.ELDQDM*VT#EDEDDPGSHKR.G	0.970874	3	N	H	0.98	0.96	2.06501e-13	3.0616	820295	863433	0.95	0.93	HN3_1E1_MSA	4541	3	0.98	58.12	-	-	-	ELDQDM()VT(p)EDEDDPGSHKR
IPI00412415	BAZ1A	K.ELDQDM*VT#EDEDDPGSHKR.G	1.14943	3	N	H	0.97	0.94	1.12133e-14	3.2768	1239152	1562146	0.79	0.93	HN3_1E1_LTQ	5507	3	0.98	61.27	-	-	-	ELDQDM()VT(p)EDEDDPGSHKR
IPI00412415	BAZ1A	K.ELDQDM*VT#EDEDDPGSHKR.G	1.19	3	N	L	0.99	0.99	0	3.4959	673285	599990	1.12	0.95	LN3_1E1_MSA	4629	3	0.98	78.78	-	-	-	ELDQDM()VT(p)EDEDDPGSHKR
IPI00412415	BAZ1A	K.ELDQDM*VT#EDEDDPGSHKR.G	0.574713	4	N	H	0.97	0.93	4.69078e-09	3.6813	1917566	1140124	1.68	0.99	HN4_1E1_LTQ	5714	3	0.98	46.94	-	-	-	ELDQDM()VT(p)EDEDDPGSHKR
IPI00412415	BAZ1A	K.ELDQDM*VT#EDEDDPGSHKR.G	0.606061	4	N	H	0.77	0.59	4.97538e-06	3.2068	1485902	901264	1.65	0.97	HN4_1E1_MSA	4255	3	0.98	53.61	-	-	-	ELDQDM()VT(p)EDEDDPGSHKR
IPI00412415	BAZ1A	K.ELDQDM*VT#EDEDDPGSHKR.G	0.502513	5	N	H	0.97	0.94	0	3.0769	1537662	710009	2.17	0.98	HN5_9E1_LTQ	3023	3	0.98	53.67	-	-	-	ELDQDM()VT(p)EDEDDPGSHKR
IPI00412415	BAZ1A	K.ELDQDMVT#EDEDDPGSHK^R@.G	0.917431	0	N	H	0.97	0.95	0	4.1126	1002147	988127	1.01	0.99	HN0_1E1_LTQ	5337	3	0.98	68.23	-	-	-	ELDQDMVT(p)EDEDDPGSHK()R()
IPI00412415	BAZ1A	K.ELDQDMVT#EDEDDPGSHKR.G	0.970874	2	N	H	0.99	0.98	0	3.0327	1382096	1708017	0.81	0.86	HN2_1E1_LTQ	6006	3	0.98	50.28	-	-	-	ELDQDMVT(p)EDEDDPGSHKR
IPI00412415	BAZ1A	K.ELDQDMVT#EDEDDPGSHKR.G	1.04167	2	N	H	0.99	0.97	1.55431e-15	3.2674	783116	934814	0.84	0.96	HN2_1E1_MSA	5368	3	0.98	45.74	-	-	-	ELDQDMVT(p)EDEDDPGSHKR
IPI00412415	BAZ1A	K.ELDQDMVT#EDEDDPGSHK^R@.G	1.21	2	N	L	0.95	0.9	1.29896e-14	3.7251	1472957	1626126	0.91	0.89	LN2_1E1_LTQ	5549	3	0.98	84.39	-	-	-	ELDQDMVT(p)EDEDDPGSHK()R()
IPI00412415	BAZ1A	K.ELDQDMVT#EDEDDPGSHKR.G	1.21	2	N	L	0.95	0.9	1.29896e-14	3.0798	1472957	1626126	0.91	0.89	LN2_1E1_LTQ	5548	3	0.98	40.01	-	-	-	ELDQDMVT(p)EDEDDPGSHKR
IPI00412415	BAZ1A	K.ELDQDMVT#EDEDDPGSHKR.G	1.14	3	N	L	0.97	0.94	9.14491e-13	3.2914	2196055	3626852	0.61	0.85	LN3_1E1_LTQ	6011	3	0.98	76.28	-	-	-	ELDQDMVT(p)EDEDDPGSHKR
IPI00412415	BAZ1A	K.ELDQDMVT#EDEDDPGSHKR.G	1.22	3	N	L	0.98	0.96	3.02758e-13	3.8056	1354611	1813742	0.75	0.77	LN3_1E1_MSA	5261	3	0.98	76.47	-	-	-	ELDQDMVT(p)EDEDDPGSHKR
IPI00412415	BAZ1A	K.ELDQDMVT#EDEDDPGSHKR.G	0.409836	4	N	H	0.97	0.95	1.11022e-16	3.579	4188896	2458290	1.7	0.97	HN4_1E1_LTQ	6288	3	0.98	60.4	-	-	-	ELDQDMVT(p)EDEDDPGSHKR
IPI00412415	BAZ1A	K.ELDQDMVT#EDEDDPGSHKR.G	0.411523	4	N	H	0.99	0.98	2.07612e-14	3.4458	2988383	1579834	1.89	1	HN4_1E1_MSA	4861	3	0.98	60.46	-	-	-	ELDQDMVT(p)EDEDDPGSHKR
IPI00412415	BAZ1A	K.ELDQDMVT#EDEDDPGSHK^R@.G	0.41	4	N	L	0.98	0.95	0	3.7865	601940	1399723	0.43	0.95	LN4_1E1_LTQ	5610	3	0.98	32.81	-	-	-	ELDQDMVT(p)EDEDDPGSHK()R()
IPI00412415	BAZ1A	K.RQS#PEPSPVTLGR.R	0.699301	4	N	H	0.65	0.42	4.6136e-06	2.516	940106	487237	1.93	0.92	HN4_1E2_MSA	2814	2	0.98	15.65	-	-	-	RQS(p)PEPSPVTLGR
IPI00412415	BAZ1A	R.KRQS#PEPSPV.T	0.505051	5	N	H	1	0.99	0	2.6589	3701065	1863864	1.99	1	HN5_8E1_MSA	1687	2	0.98	33.17	-	-	-	KRQS(p)PEPSPV
IPI00216695	BAZ1B	R.LAEDEGDS#EPEAVGQSR.G	0.917431	0	N	H	1	0.99	0	3.3757	6355631	5774674	1.1	0.99	HN0_1E1_LTQ	4703	2	0.98	104.75	-	-	-	LAEDEGDS(p)EPEAVGQSR
IPI00216695	BAZ1B	R.LAEDEGDS#EPEAVGQSR.G	0.917431	0	N	H	1	0.99	0	3.5166	7477333	6920270	1.08	0.99	HN0_1E1_MSA	4345	2	0.98	110.92	-	-	-	LAEDEGDS(p)EPEAVGQSR
IPI00216695	BAZ1B	R.LAEDEGDS#EPEAVGQSR@.G	0.917431	0	N	H	1	0.99	0	3.1911	6355631	5774674	1.1	0.99	HN0_1E1_LTQ	4687	2	0.98	102.46	-	-	-	LAEDEGDS(p)EPEAVGQSR()
IPI00216695	BAZ1B	R.LAEDEGDS#EPEAVGQSR@.G	0.917431	0	N	H	1	0.99	0	3.5924	7477333	6920270	1.08	0.99	HN0_1E1_MSA	4338	2	0.98	112.26	-	-	-	LAEDEGDS(p)EPEAVGQSR()
IPI00216695	BAZ1B	R.LAEDEGDS#EPEAVGQSR.G	1.03093	2	N	H	1	0.99	0	3.7456	8241347	8484337	0.97	0.99	HN2_1E1_LTQ	5289	2	0.98	107.81	-	-	-	LAEDEGDS(p)EPEAVGQSR
IPI00069817	BAZ1B	R.LAEDEGDS#EPEAVGQSR.G	1.06383	2	N	H	1	1	0	3.9074	2882998	3027173	0.95	0.99	HN2_1E1_MSA	4799	2	0.98	108.93	-	-	-	LAEDEGDS(p)EPEAVGQSR
IPI00216695	BAZ1B	R.LAEDEGDS#EPEAVGQSR.G	1.06383	2	N	H	1	1	0	3.9074	2882998	3027173	0.95	0.99	HN2_1E1_MSA	4799	2	0.98	108.93	-	-	-	LAEDEGDS(p)EPEAVGQSR
IPI00216695	BAZ1B	R.LAEDEGDS#EPEAVGQSR.G	1.07527	2	N	H	0.9	0.8	0	2.5042	250296	282740	0.89	0.94	HN2_1E6_LTQ	2674	2	0.98	63.61	-	-	-	LAEDEGDS(p)EPEAVGQSR
IPI00216695	BAZ1B	R.LAEDEGDS#EPEAVGQSR@.G	1.03093	2	N	H	1	0.99	0	3.4722	8241347	8484337	0.97	0.99	HN2_1E1_LTQ	5311	2	0.98	109.16	-	-	-	LAEDEGDS(p)EPEAVGQSR()
IPI00216695	BAZ1B	R.LAEDEGDS#EPEAVGQSR@.G	1.06383	2	N	H	1	1	0	3.3903	2882998	3027173	0.95	0.99	HN2_1E1_MSA	4790	2	0.98	82.44	-	-	-	LAEDEGDS(p)EPEAVGQSR()
IPI00069817	BAZ1B	R.LAEDEGDS#EPEAVGQSR@.G	1.06383	2	N	H	1	1	0	3.2536	2882998	3027173	0.95	0.99	HN2_1E1_MSA	4858	2	0.98	75.11	-	-	-	LAEDEGDS(p)EPEAVGQSR()
IPI00216695	BAZ1B	R.LAEDEGDS#EPEAVGQSR.G	1.21	2	N	L	1	1	0	3.0701	7451624	6041928	1.23	0.99	LN2_1E1_LTQ	4871	2	0.98	121.46	-	-	-	LAEDEGDS(p)EPEAVGQSR
IPI00216695	BAZ1B	R.LAEDEGDS#EPEAVGQSR.G	1.27	2	N	L	1	1	0	3.7229	4366618	3446697	1.27	1	LN2_1E1_MSA	4517	2	0.98	103.3	-	-	-	LAEDEGDS(p)EPEAVGQSR
IPI00069817	BAZ1B	R.LAEDEGDS#EPEAVGQSR.G	1.27	2	N	L	1	1	0	3.5049	4366618	3446697	1.27	1	LN2_1E1_MSA	4565	2	0.98	115.42	-	-	-	LAEDEGDS(p)EPEAVGQSR
IPI00216695	BAZ1B	R.LAEDEGDS#EPEAVGQSR.G	2.62	2	N	L	0.93	0.86	0	2.7641	561253	195543	2.87	0.98	LN2_1E6_MSA	2623	2	0.98	71.85	-	-	-	LAEDEGDS(p)EPEAVGQSR
IPI00216695	BAZ1B	R.LAEDEGDS#EPEAVGQSR.G	2.91	2	N	L	0.89	0.79	4.55191e-15	2.8192	513754	170362	3.02	0.98	LN2_1E6_LTQ	2517	2	0.98	65.55	-	-	-	LAEDEGDS(p)EPEAVGQSR
IPI00216695	BAZ1B	R.LAEDEGDS#EPEAVGQSR@.G	1.21	2	N	L	1	1	0	2.9268	7451624	6041928	1.23	0.99	LN2_1E1_LTQ	4903	2	0.98	79.13	-	-	-	LAEDEGDS(p)EPEAVGQSR()
IPI00069817	BAZ1B	R.LAEDEGDS#EPEAVGQSR@.G	1.27	2	N	L	1	1	0	4.1058	4366618	3446697	1.27	1	LN2_1E1_MSA	4525	2	0.98	110.16	-	-	-	LAEDEGDS(p)EPEAVGQSR()
IPI00216695	BAZ1B	R.LAEDEGDS#EPEAVGQSR@.G	1.27	2	N	L	1	1	0	4.1058	4366618	3446697	1.27	1	LN2_1E1_MSA	4525	2	0.98	110.16	-	-	-	LAEDEGDS(p)EPEAVGQSR()
IPI00216695	BAZ1B	R.LAEDEGDS#EPEAVGQSR.G	0.490196	3	N	H	1	0.99	0	3.7232	15681299	7842340	2	1	HN3_1E1_LTQ	5787	2	0.98	107.21	-	-	-	LAEDEGDS(p)EPEAVGQSR
IPI00069817	BAZ1B	R.LAEDEGDS#EPEAVGQSR.G	0.49505	3	N	H	1	0.99	0	3.449	7632705	3827449	1.99	1	HN3_1E1_MSA	4710	2	0.98	99.52	-	-	-	LAEDEGDS(p)EPEAVGQSR
IPI00216695	BAZ1B	R.LAEDEGDS#EPEAVGQSR.G	0.49505	3	N	H	1	0.99	0	3.449	7632705	3827449	1.99	1	HN3_1E1_MSA	4710	2	0.98	99.52	-	-	-	LAEDEGDS(p)EPEAVGQSR
IPI00216695	BAZ1B	R.LAEDEGDS#EPEAVGQSR@.G	0.490196	3	N	H	1	0.99	0	3.6655	15681299	7842340	2	1	HN3_1E1_LTQ	5809	2	0.98	104.03	-	-	-	LAEDEGDS(p)EPEAVGQSR()
IPI00069817	BAZ1B	R.LAEDEGDS#EPEAVGQSR@.G	0.49505	3	N	H	1	0.99	0	3.7159	7632705	3827449	1.99	1	HN3_1E1_MSA	4705	2	0.98	69.25	-	-	-	LAEDEGDS(p)EPEAVGQSR()
IPI00216695	BAZ1B	R.LAEDEGDS#EPEAVGQSR@.G	0.49505	3	N	H	1	0.99	0	4.0052	7632705	3827449	1.99	1	HN3_1E1_MSA	4777	2	0.98	100.08	-	-	-	LAEDEGDS(p)EPEAVGQSR()
IPI00216695	BAZ1B	R.LAEDEGDS#EPEAVGQSR.G	0.6	3	N	L	1	0.99	0	3.5952	4902904	8266188	0.59	0.99	LN3_1E1_LTQ	5193	2	0.98	93.81	-	-	-	LAEDEGDS(p)EPEAVGQSR
IPI00216695	BAZ1B	R.LAEDEGDS#EPEAVGQSR.G	0.61	3	N	L	1	0.99	0	4.2122	2849624	4905306	0.58	0.99	LN3_1E1_MSA	4693	2	0.98	99.94	-	-	-	LAEDEGDS(p)EPEAVGQSR
IPI00216695	BAZ1B	R.LAEDEGDS#EPEAVGQSR.G	1.05	3	N	L	0.89	0.79	1.82881e-11	2.8926	136669	130434	1.05	0.91	LN3_1E6_MSA	2381	2	0.98	46.02	-	-	-	LAEDEGDS(p)EPEAVGQSR
IPI00216695	BAZ1B	R.LAEDEGDS#EPEAVGQSR@.G	0.6	3	N	L	1	0.99	0	3.4948	4902904	8266188	0.59	0.99	LN3_1E1_LTQ	5252	2	0.98	108.08	-	-	-	LAEDEGDS(p)EPEAVGQSR()
IPI00216695	BAZ1B	R.LAEDEGDS#EPEAVGQSR@.G	0.61	3	N	L	1	0.99	0	3.7974	2849624	4905306	0.58	0.99	LN3_1E1_MSA	4682	2	0.98	112.23	-	-	-	LAEDEGDS(p)EPEAVGQSR()
IPI00216695	BAZ1B	R.LAEDEGDS#EPEAVGQSR.G	0.284091	4	N	H	1	0.99	0	3.8496	14501292	4078144	3.56	0.99	HN4_1E1_MSA	4325	2	0.98	109.65	-	-	-	LAEDEGDS(p)EPEAVGQSR
IPI00069817	BAZ1B	R.LAEDEGDS#EPEAVGQSR.G	0.284091	4	N	H	1	0.99	0	3.7925	14501292	4078144	3.56	0.99	HN4_1E1_MSA	4380	2	0.98	120.51	-	-	-	LAEDEGDS(p)EPEAVGQSR
IPI00216695	BAZ1B	R.LAEDEGDS#EPEAVGQSR.G	0.286533	4	N	H	1	0.99	0	3.6689	18005492	5429201	3.32	0.99	HN4_1E1_LTQ	5786	2	0.98	94.2	-	-	-	LAEDEGDS(p)EPEAVGQSR
IPI00069817	BAZ1B	R.LAEDEGDS#EPEAVGQSR.G	0.286533	4	N	H	1	0.99	0	3.1218	18005492	5429201	3.32	0.99	HN4_1E1_LTQ	5861	2	0.98	99.02	-	-	-	LAEDEGDS(p)EPEAVGQSR
IPI00069817	BAZ1B	R.LAEDEGDS#EPEAVGQSR.G	0.414938	4	N	H	0.96	0.92	1.60427e-13	3.362	710874	300225	2.37	0.96	HN4_1E1_LTQ	5824	3	0.98	94.77	-	-	-	LAEDEGDS(p)EPEAVGQSR
IPI00216695	BAZ1B	R.LAEDEGDS#EPEAVGQSR.G	0.414938	4	N	H	0.96	0.92	1.60427e-13	3.362	710874	300225	2.37	0.96	HN4_1E1_LTQ	5824	3	0.98	94.77	-	-	-	LAEDEGDS(p)EPEAVGQSR
IPI00216695	BAZ1B	R.LAEDEGDS#EPEAVGQSR.G	0.27	4	N	L	0.99	0.99	0	3.1623	2163791	8159006	0.27	0.99	LN4_1E1_LTQ	4849	2	0.98	52.33	-	-	-	LAEDEGDS(p)EPEAVGQSR
IPI00069817	BAZ1B	R.LAEDEGDS#EPEAVGQSR.G	0.27	4	N	L	0.99	0.99	0	2.941	2163791	8159006	0.27	0.99	LN4_1E1_LTQ	4922	2	0.98	61.88	-	-	-	LAEDEGDS(p)EPEAVGQSR
IPI00216695	BAZ1B	R.LAEDEGDS#EPEAVGQSR.G	0.27	4	N	L	1	1	0	3.3285	1279369	4677601	0.27	1	LN4_1E1_MSA	4172	2	0.98	104.92	-	-	-	LAEDEGDS(p)EPEAVGQSR
IPI00069817	BAZ1B	R.LAEDEGDS#EPEAVGQSR@.G	0.27	4	N	L	0.99	0.99	0	3.6053	2163791	8159006	0.27	0.99	LN4_1E1_LTQ	4835	2	0.98	97.59	-	-	-	LAEDEGDS(p)EPEAVGQSR()
IPI00216695	BAZ1B	R.LAEDEGDS#EPEAVGQSR@.G	0.27	4	N	L	0.99	0.99	0	3.6053	2163791	8159006	0.27	0.99	LN4_1E1_LTQ	4835	2	0.98	97.59	-	-	-	LAEDEGDS(p)EPEAVGQSR()
IPI00216695	BAZ1B	R.LAEDEGDS#EPEAVGQSR@.G	0.27	4	N	L	1	1	0	3.8155	1279369	4677601	0.27	1	LN4_1E1_MSA	4152	2	0.98	100.48	-	-	-	LAEDEGDS(p)EPEAVGQSR()
IPI00069817	BAZ1B	R.LAEDEGDS#EPEAVGQSR.G	0.358423	5	N	H	0.99	0.98	0	3.4194	21269083	7603207	2.8	0.99	HN5_1E1_LTQ	3226	2	0.98	98.51	-	-	-	LAEDEGDS(p)EPEAVGQSR
IPI00216695	BAZ1B	R.LAEDEGDS#EPEAVGQSR.G	0.358423	5	N	H	0.99	0.98	0	3.898	21269083	7603207	2.8	0.99	HN5_1E1_LTQ	3283	2	0.98	111.31	-	-	-	LAEDEGDS(p)EPEAVGQSR
IPI00216695	BAZ1B	R.LAEDEGDS#EPEAVGQSR.G	0.362319	5	N	H	0.99	0.99	0	3.8469	16715310	6098769	2.74	0.99	HN5_1E1_MSA	3063	2	0.98	111.8	-	-	-	LAEDEGDS(p)EPEAVGQSR
IPI00216695	BAZ1B	R.LAEDEGDS#EPEAVGQSR.G	0.487805	5	N	H	0.74	0.55	9.49417e-08	2.8958	675976	235795	2.87	0.94	HN5_1E2_LTQ	2367	2	0.98	97.26	-	-	-	LAEDEGDS(p)EPEAVGQSR
IPI00216695	BAZ1B	R.LAEDEGDS#EPEAVGQSR@.G	0.358423	5	N	H	0.99	0.98	0	3.5074	21269083	7603207	2.8	0.99	HN5_1E1_LTQ	3284	2	0.98	89.75	-	-	-	LAEDEGDS(p)EPEAVGQSR()
IPI00216695	BAZ1B	R.LAEDEGDS#EPEAVGQSR@.G	0.362319	5	N	H	0.99	0.99	0	3.8638	16715310	6098769	2.74	0.99	HN5_1E1_MSA	2978	2	0.98	87.87	-	-	-	LAEDEGDS(p)EPEAVGQSR()
IPI00216695	BAZ1B	R.LAEDEGDS#EPEAVGQSR.G	0.44	5	N	L	0.99	0.99	0	3.4514	6376705	14414005	0.44	0.99	LN5_1E1_MSA	3042	2	0.98	105.64	-	-	-	LAEDEGDS(p)EPEAVGQSR
IPI00216695	BAZ1B	R.LAEDEGDS#EPEAVGQSR.G	0.45	5	N	L	0.99	0.99	0	3.4032	9270936	20593956	0.45	1	LN5_1E1_LTQ	3231	2	0.98	85.69	-	-	-	LAEDEGDS(p)EPEAVGQSR
IPI00069817	BAZ1B	R.LAEDEGDS#EPEAVGQSR.G	0.45	5	N	L	0.99	0.99	0	3.134	9270936	20593956	0.45	1	LN5_1E1_LTQ	3286	2	0.98	105.34	-	-	-	LAEDEGDS(p)EPEAVGQSR
IPI00216695	BAZ1B	R.LAEDEGDS#EPEAVGQSR@.G	0.44	5	N	L	0.99	0.99	0	3.7168	6376705	14414005	0.44	0.99	LN5_1E1_MSA	3036	2	0.98	120.26	-	-	-	LAEDEGDS(p)EPEAVGQSR()
IPI00069817	BAZ1B	R.LAEDEGDS#EPEAVGQSR@.G	0.45	5	N	L	0.99	0.99	0	4.0659	9270936	20593956	0.45	1	LN5_1E1_LTQ	3290	2	0.98	128.53	-	-	-	LAEDEGDS(p)EPEAVGQSR()
IPI00216695	BAZ1B	R.LAEDEGDS#EPEAVGQSR@.G	0.45	5	N	L	0.99	0.99	0	4.0659	9270936	20593956	0.45	1	LN5_1E1_LTQ	3290	2	0.98	128.53	-	-	-	LAEDEGDS(p)EPEAVGQSR()
IPI00216695	BAZ1B	R.LAEDEGDS#EPEAVGQSR@.G	0.54	5	N	L	0.96	0.92	0	3.5755	333459	657817	0.51	0.98	LN5_2E1_MSA	1884	2	0.98	103.45	-	-	-	LAEDEGDS(p)EPEAVGQSR()
IPI00943770	BAZ2A	R.AGDPGEMPQS#PTGLGQPK.R	0.73	2	N	L	0.84	0.71	7.6215e-06	2.7854	236545	339290	0.7	0.95	LN2_1E1_MSA	5688	2	0.98	6.94	-	-	-	AGDPGEMPQS(p)PTGLGQPK
IPI00943770	BAZ2A	R.AGDPGEMPQS#PTGLGQPK^.R	0.89	3	N	L	0.66	0.44	0.000523922	2.5535	316143	356168	0.89	0.84	LN3_1E1_MSA	5765	2	0.98	6.15	-	-	-	AGDPGEMPQS(p)PTGLGQPK()
IPI00943770	BAZ2A	R.AGDPGEMPQS#PTGLGQPK^.R	1.05	3	N	L	0.67	0.45	0.000214053	2.5943	615390	611432	1.01	0.96	LN3_1E1_LTQ	6622	2	0.98	4.09	-	-	-	AGDPGEMPQSPT(p)GLGQPK()
IPI00943770	BAZ2A	R.AGDPGEMPQS#PTGLGQPK.R	0.606061	4	N	H	0.86	0.74	8.66115e-07	3.0892	537134	315661	1.7	0.97	HN4_1E1_MSA	5320	2	0.98	5.29	-	-	-	AGDPGEMPQS(p)PTGLGQPK
IPI00944561	BCKDHA	R.IGHHS#TSDDSSAYR.S	1.0101	4	N	H	0.71	0.51	2.38082e-10	2.5063	531260	420642	1.26	0.79	HN4_1E1_LTQ	4591	2	0.98	8.95	-	-	-	IGHHS(p)TSDDSSAYR
IPI00400869	BCL11A	K.AVDK^PPS#PSPIEM*K^.K	0.78125	2	N	H	0.89	0.79	5.71009e-08	2.9344	290308	213518	1.36	0.96	HN2_1E1_MSA	4818	2	0.98	7.61	-	-	-	AVDK()PPS(p)PSPIEM()K()
IPI00400869	BCL11A	K.AVDKPPS#PSPIEM*K.K	1.24	2	N	L	0.93	0.87	3.66374e-15	2.8368	646043	477899	1.35	0.97	LN2_1E1_LTQ	4851	2	0.98	7.35	-	-	-	AVDKPPS(p)PSPIEM()K
IPI00400869	BCL11A	K.AVDKPPS#PSPIEM*K.K	1.44	2	N	L	0.89	0.8	2.81934e-10	2.8593	395772	243642	1.62	0.98	LN2_1E1_MSA	4537	2	0.98	10.82	-	-	-	AVDKPPS(p)PSPIEM()K
IPI00400868	BCL11A	K.AVDKPPS#PSPIEM*K.K	0.840336	3	N	H	0.97	0.93	0	2.9314	1071011	825420	1.3	0.96	HN3_1E2_LTQ	3804	2	0.98	7.35	-	-	-	AVDKPPS(p)PSPIEM()K
IPI00400868	BCL11A	K.AVDKPPS#PSPIEMK.K	0.925926	0	N	H	0.91	0.84	0	2.8687	460037	391122	1.18	0.96	HN0_1E2_LTQ	4193	2	0.98	7.35	-	-	-	AVDKPPS(p)PSPIEMK
IPI00400868	BCL11A	K.AVDK^PPS#PSPIEMK^.K	0.877193	3	N	H	0.94	0.89	0	2.5764	1264333	1052149	1.2	0.96	HN3_1E2_LTQ	4778	2	0.98	7.35	-	-	-	AVDK()PPS(p)PSPIEMK()
IPI00400868	BCL11A	K.AVDK^PPS#PSPIEMK^.K	0.970874	3	N	H	0.97	0.94	0	3.1429	957563	882989	1.08	0.97	HN3_1E2_MSA	3939	2	0.98	11.6	-	-	-	AVDK()PPS(p)PSPIEMK()
IPI00400868	BCL11A	K.AVDKPPS#PSPIEMK.K	0.970874	3	N	H	0.97	0.94	0	3.1467	957563	882989	1.08	0.97	HN3_1E2_MSA	3930	2	0.98	13.94	-	-	-	AVDKPPS(p)PSPIEMK
IPI00400868	BCL11A	K.AVDKPPS#PSPIEMK.K	0.401606	4	N	H	0.98	0.96	0	3.3238	1801042	745410	2.42	0.97	HN4_1E2_MSA	3406	2	0.98	13.64	-	-	-	AVDKPPS(p)PSPIEMK
IPI00400869	BCL11A	K.LLLGS#PSSLS#PFSK.R	2.22222	4	N	H	0.26	0.07	0.0681779	3.0586	1744456	976024	1.79	0.95	HN4_1E1_LTQ	11730	2	0.98	17.37	5.29	-	-	LLLGS(p)PSSLS(p)PFSK
IPI00400869	BCL11A	K.LLLGS#PSSLS#PFSK.R	1.26494	4	N	H	-1	0	1	2.5623	1463735	1851532	0.79	0.79	HN4_1E1_MSA	9529	2	0.98	15.74	5.19	-	-	LLLGS(p)PSSLS(p)PFSK
IPI00400869	BCL11A	K.LLLGS#PSSLSPFSK^.R	0.900901	0	N	H	0.84	0.71	4.18554e-13	2.5543	572983	462460	1.24	0.91	HN0_1E1_MSA	7717	2	0.98	7.31	-	-	-	LLLGS(p)PSSLSPFSK()
IPI00400869	BCL11A	K.LLLGS#PSSLSPFSK.R	0.819672	2	N	H	0.95	0.9	0	2.7699	1722281	1426486	1.21	0.95	HN2_1E1_MSA	9942	2	0.98	7.89	-	-	-	LLLGS(p)PSSLSPFSK
IPI00400869	BCL11A	K.LLLGS#PSSLSPFSK.R	0.82	2	N	L	0.93	0.86	0	3.0697	1642404	2001283	0.82	0.96	LN2_1E1_LTQ	10789	2	0.98	13.79	-	-	-	LLLGS(p)PSSLSPFSK
IPI00400869	BCL11A	K.LLLGS#PSSLSPFSK.R	0.93	2	N	L	0.93	0.87	0	2.961	1549291	1807032	0.86	0.96	LN2_1E1_MSA	9821	2	0.98	10.82	-	-	-	LLLGS(p)PSSLSPFSK
IPI00400869	BCL11A	K.LLLGS#PSSLSPFSK^.R	0.900901	3	N	H	0.93	0.87	0	2.6744	1559363	1452947	1.07	0.97	HN3_1E1_LTQ	12610	2	0.98	8.52	-	-	-	LLLGS(p)PSSLSPFSK()
IPI00400869	BCL11A	K.LLLGS#PSSLSPFSK.R	1	3	N	L	0.93	0.86	0	2.9273	1587087	1934453	0.82	0.94	LN3_1E1_MSA	9850	2	0.98	7.05	-	-	-	LLLGS(p)PSSLSPFSK
IPI00400869	BCL11A	K.LLLGS#PSSLSPFSK^.R	1	3	N	L	0.93	0.86	0	2.7177	1587087	1934453	0.82	0.94	LN3_1E1_MSA	9891	2	0.98	9.45	-	-	-	LLLGS(p)PSSLSPFSK()
IPI00400869	BCL11A	K.LLLGS#PSSLSPFSK.R	0.340136	4	N	H	0.91	0.82	0	3.5508	2706345	877224	3.09	0.98	HN4_1E1_MSA	9569	2	0.98	7.35	-	-	-	LLLGS(p)PSSLSPFSK
IPI00400869	BCL11A	K.LLLGS#PSSLSPFSK.R	0.352113	4	N	H	0.87	0.76	6.43929e-14	2.9904	3313674	1021361	3.24	0.97	HN4_1E1_LTQ	11797	2	0.98	7.35	-	-	-	LLLGS(p)PSSLSPFSK
IPI00400869	BCL11A	K.LLLGS#PSSLSPFSK^.R	0.24	4	N	L	0.84	0.71	2.38731e-12	2.7562	242352	982332	0.25	0.96	LN4_1E1_MSA	9080	2	0.98	17.29	-	-	-	LLLGS(p)PSSLSPFSK()
IPI00400869	BCL11A	K.LLLGS#PSSLSPFSK^.R	0.28	4	N	L	0.86	0.73	2.5091e-14	2.815	254860	896135	0.28	0.96	LN4_1E1_LTQ	10440	2	0.98	7.89	-	-	-	LLLGS(p)PSSLSPFSK()
IPI00400869	BCL11A	K.LLLGS#PSSLSPFSK.R	0.558659	5	N	H	0.82	0.66	6.34293e-12	2.94	839118	325008	2.58	0.94	HN5_1E1_MSA	7368	2	0.98	15.74	-	-	-	LLLGS(p)PSSLSPFSK
IPI00400869	BCL11A	K.LLLGS#PSSLSPFSK.R	0.694444	5	N	H	0.86	0.73	1.10073e-09	2.5989	526358	229041	2.3	0.78	HN5_1E1_LTQ	7871	2	0.98	9.45	-	-	-	LLLGS(p)PSSLSPFSK
IPI00400869	BCL11A	K.LLLGSPSSLS#PFSK.R	1.0101	0	N	H	0.91	0.83	0	2.9262	699921	679840	1.03	0.96	HN0_1E1_LTQ	9065	2	0.98	7.92	-	-	-	LLLGSPSSLS(p)PFSK
IPI00400869	BCL11A	K.LLLGSPSSLS#PFSK^.R	1.0101	0	N	H	0.91	0.83	0	2.7352	699921	679840	1.03	0.96	HN0_1E1_LTQ	9060	2	0.98	8.12	-	-	-	LLLGSPSSLS(p)PFSK()
IPI00400869	BCL11A	K.LLLGSPSSLS#PFSK.R	1.38889	2	N	H	0.92	0.85	0	2.8363	2170095	3117106	0.7	0.98	HN2_1E1_LTQ	10742	2	0.98	10.74	-	-	-	LLLGSPSSLS(p)PFSK
IPI00400869	BCL11A	K.LLLGSPSSLS#PFSK.R	1.38889	2	N	H	0.94	0.88	0	2.9305	1704053	2352749	0.72	0.98	HN2_1E1_MSA	9413	2	0.98	15.74	-	-	-	LLLGSPSSLS(p)PFSK
IPI00400869	BCL11A	K.LLLGSPSSLS#PFSK^.R	1.38889	2	N	H	0.92	0.85	0	2.5287	2170095	3117106	0.7	0.98	HN2_1E1_LTQ	10730	2	0.98	11.67	-	-	-	LLLGSPSSLS(p)PFSK()
IPI00400869	BCL11A	K.LLLGSPSSLS#PFSK^.R	1.38889	2	N	H	0.94	0.88	0	2.9598	1704053	2352749	0.72	0.98	HN2_1E1_MSA	9406	2	0.98	0.91	-	-	-	LLLGSPS(p)SLSPFSK()
IPI00400869	BCL11A	K.LLLGSPSSLS#PFSK.R	1.29	2	N	L	0.94	0.89	0	2.7714	2277997	1775722	1.28	0.96	LN2_1E1_MSA	9213	2	0.98	1.22	-	-	-	LLLGSPSSLS(p)PFSK
IPI00300332	BCL11A	K.LLLGSPSSLS#PFSK.R	1.29	2	N	L	0.94	0.89	0	2.7613	2277997	1775722	1.28	0.96	LN2_1E1_MSA	9264	2	0.98	15.74	-	-	-	LLLGSPSSLS(p)PFSK
IPI00400869	BCL11A	K.LLLGSPSSLS#PFSK.R	0.833333	3	N	H	0.7	0.49	8.30784e-06	3.4128	1578602	1548437	1.02	0.94	HN3_1E1_LTQ	11900	2	0.98	10.01	-	-	-	LLLGSPSSLS(p)PFSK
IPI00400869	BCL11A	K.LLLGSPSSLS#PFSK.R	1.05263	3	N	H	0.77	0.6	2.28158e-08	3.0735	1103483	1124728	0.98	0.75	HN3_1E1_MSA	9748	2	0.98	13.37	-	-	-	LLLGSPSSLS(p)PFSK
IPI00400869	BCL11A	K.LLLGSPSSLS#PFSK.R	0.62	3	N	L	0.96	0.91	0	2.6483	1099111	1870602	0.59	0.97	LN3_1E1_MSA	9286	2	0.98	11.36	-	-	-	LLLGSPSSLS(p)PFSK
IPI00400869	BCL11A	R.FST#PPGELDGGISGR.S	1.11111	2	N	H	0.95	0.91	0	2.6751	1683779	2008313	0.84	0.93	HN2_1E1_MSA	6939	2	0.98	0.9	-	-	-	FST(p)PPGELDGGISGR
IPI00400869	BCL11A	R.FST#PPGELDGGISGR.S	1.11	2	N	L	0.95	0.9	0	3.0387	1702647	1864928	0.91	0.94	LN2_1E1_MSA	6678	2	0.98	6.75	-	-	-	FST(p)PPGELDGGISGR
IPI00400869	BCL11A	R.FST#PPGELDGGISGR.S	0.578035	3	N	H	0.71	0.5	6.05053e-07	2.9735	1380684	698535	1.98	0.95	HN3_1E1_MSA	6984	2	0.98	8.95	-	-	-	FST(p)PPGELDGGISGR
IPI00400869	BCL11A	R.FST#PPGELDGGISGR.S	0.33	3	N	L	0.95	0.89	0	2.6405	501918	1527944	0.33	0.93	LN3_1E1_MSA	6765	2	0.98	10.1	-	-	-	FST(p)PPGELDGGISGR
IPI00400867	BCL11A	R.FST#PPGELDGGISGR.S	0.520833	5	N	H	0.64	0.41	1.41139e-05	2.8655	387152	100836	3.84	0.92	HN5_3E1_MSA	3199	2	0.98	5.88	-	-	-	FST(p)PPGELDGGISGR
IPI00400869	BCL11A	R.FST#PPGELDGGISGR.S	0.704225	5	N	H	0.59	0.35	2.31448e-05	3.0735	1005359	298981	3.36	0.91	HN5_1E1_MSA	4936	2	0.98	5.88	-	-	-	FST(p)PPGELDGGISGR
IPI00400867	BCL11A	R.FST#PPGELDGGISGR@.S	0.24	5	N	L	0.66	0.43	2.09069e-06	2.5771	112383	418435	0.27	0.9	LN5_2E1_MSA	2695	2	0.98	7.53	-	-	-	FST(p)PPGELDGGISGR()
IPI00447051	BCL7C	K.GTEPSPGGTPQPSRPVS#PAGPPEGVPEEAQPPR.L	2.27	3	N	L	0.94	0.89	1.21014e-14	3.0169	2101088	842140	2.49	0.98	LN3_1E1_LTQ	7385	3	0.98	3.4	-	-	-	GTEPSPGGTPQPSRPVS(p)PAGPPEGVPEEAQPPR
IPI00447051	BCL7C	K.GTEPSPGGTPQPSRPVS#PAGPPEGVPEEAQPPR.L	1.8	5	N	L	0.87	0.75	1.3795e-08	3.1053	832884	361349	2.3	0.96	LN5_3E1_LTQ	3540	3	0.98	-0.42	-	-	-	GTEPSPGGTPQPSRPVS(p)PAGPPEGVPEEAQPPR
IPI00447051	BCL7C	R.GGGPLILLDLNDENS#NQSFHSEGSLQK^.G	1.31579	2	N	H	0.92	0.84	0	4.8332	2946600	3798299	0.78	0.95	HN2_1E1_LTQ	11495	3	0.98	5.07	-	-	-	GGGPLILLDLNDENS(p)NQSFHSEGSLQK()
IPI00447051	BCL7C	R.GGGPLILLDLNDENS#NQSFHSEGSLQK^.G	1.5873	2	N	H	0.87	0.76	1.23235e-13	4.0789	1792936	2444115	0.73	0.92	HN2_1E1_MSA	10066	3	0.98	-2.49	-	-	-	GGGPLILLDLNDENSNQSFHS(p)EGSLQK()
IPI00447051	BCL7C	R.GGGPLILLDLNDENS#NQSFHSEGSLQK.G	0.421941	4	N	H	0.89	0.79	0	3.5733	7335932	3733712	1.96	0.96	HN4_1E1_LTQ	11908	3	0.98	4.26	-	-	-	GGGPLILLDLNDENS(p)NQSFHSEGSLQK
IPI00447051	BCL7C	R.GGGPLILLDLNDENS#NQSFHSEGSLQK.G	0.49505	4	N	H	0.91	0.83	0	3.766	5201231	2779609	1.87	0.97	HN4_1E1_MSA	9733	3	0.98	6.5	-	-	-	GGGPLILLDLNDENS(p)NQSFHSEGSLQK
IPI00413672	BCLAF1	F.NDS#EGDDTEETEDYR@.Q	0.8	0	N	H	0.63	0.4	0.000115351	3.2225	232433	83186	2.79	0.95	HN0_1E1_LTQ	4350	2	0.98	38.92	-	-	-	NDS(p)EGDDTEETEDYR()
IPI00413672	BCLAF1	F.NDS#EGDDTEETEDYR.Q	0.60241	3	N	H	0.95	0.9	2.56736e-06	2.8636	283373	158323	1.79	0.97	HN3_1E1_MSA	4466	2	0.98	66.92	-	-	-	NDS(p)EGDDTEETEDYR
IPI00413672	BCLAF1	F.NDS#EGDDTEETEDYR.Q	0.680272	3	N	H	0.94	0.88	2.31327e-09	4.143	594255	365102	1.63	0.98	HN3_1E1_LTQ	5434	2	0.98	77.28	-	-	-	NDS(p)EGDDTEETEDYR
IPI00006079	BCLAF1	F.NDS#EGDDTEETEDYR.Q	0.680272	3	N	H	0.94	0.88	2.31327e-09	4.143	594255	365102	1.63	0.98	HN3_1E1_LTQ	5434	2	0.98	77.28	-	-	-	NDS(p)EGDDTEETEDYR
IPI00413672	BCLAF1	F.NDS#EGDDTEETEDYR@.Q	0.73	3	N	L	0.96	0.92	7.33569e-12	3.9881	121160	161323	0.75	0.96	LN3_1E1_LTQ	4971	2	0.98	52.48	-	-	-	NDS(p)EGDDTEETEDYR()
IPI00413672	BCLAF1	F.NDS#EGDDTEETEDYR.Q	0.302115	4	N	H	0.93	0.86	7.88258e-15	3.171	786873	277909	2.83	0.96	HN4_1E1_LTQ	5489	2	0.98	56.05	-	-	-	NDS(p)EGDDTEETEDYR
IPI00006079	BCLAF1	F.NDS#EGDDTEETEDYR.Q	0.302115	4	N	H	0.93	0.86	7.88258e-15	3.171	786873	277909	2.83	0.96	HN4_1E1_LTQ	5489	2	0.98	56.05	-	-	-	NDS(p)EGDDTEETEDYR
IPI00006079	BCLAF1	F.NDS#EGDDTEETEDYR.Q	0.826446	4	N	H	0.6	0.36	5.39638e-08	3.7313	791186	236022	3.35	0.91	HN4_1E1_MSA	2302	2	0.98	51.84	-	-	-	NDS(p)EGDDTEETEDYR
IPI00413672	BCLAF1	F.NDS#EGDDTEETEDYR.Q	0.826446	4	N	H	0.6	0.36	5.39638e-08	4.1723	791186	236022	3.35	0.91	HN4_1E1_MSA	2470	2	0.98	74.06	-	-	-	NDS(p)EGDDTEETEDYR
IPI00413672	BCLAF1	F.NDS#EGDDTEETEDYR@.Q	0.42	4	N	L	0.91	0.82	4.6257e-09	3.4838	77463	201031	0.39	0.99	LN4_1E1_LTQ	4629	2	0.98	60.24	-	-	-	NDS(p)EGDDTEETEDYR()
IPI00413672	BCLAF1	F.NDS#EGDDTEETEDYR.Q	0.320513	5	N	H	0.94	0.88	1.7254e-12	3.7502	964094	254205	3.79	0.96	HN5_1E1_LTQ	2866	2	0.98	57.86	-	-	-	NDS(p)EGDDTEETEDYR
IPI00413672	BCLAF1	F.NDS#EGDDTEETEDYR.Q	0.34965	5	N	H	0.94	0.88	2.8092e-11	4.1794	803907	217041	3.7	0.98	HN5_1E1_MSA	2674	2	0.98	103	-	-	-	NDS(p)EGDDTEETEDYR
IPI00413672	BCLAF1	F.NDS#EGDDTEETEDYR.Q	0.36	5	N	L	0.88	0.78	1.56693e-08	3.0886	297516	698276	0.43	0.97	LN5_1E1_LTQ	2916	2	0.98	56.47	-	-	-	NDS(p)EGDDTEETEDYR
IPI00413672	BCLAF1	F.NDS#EGDDTEETEDYR@.Q	0.34	5	N	L	0.97	0.93	5.21805e-15	4.1053	197715	499098	0.4	0.98	LN5_1E1_MSA	2725	2	0.98	71.44	-	-	-	NDS(p)EGDDTEETEDYR()
IPI00413672	BCLAF1	F.NDS#EGDDTEETEDYR@.Q	0.36	5	N	L	0.88	0.78	1.56693e-08	3.5427	297516	698276	0.43	0.97	LN5_1E1_LTQ	2912	2	0.98	55.13	-	-	-	NDS(p)EGDDTEETEDYR()
IPI00413672	BCLAF1	K.AEGEPQEES#PLK.S	0.740741	0	N	H	0.95	0.91	0	2.971	758652	587813	1.29	0.96	HN0_1E2_LTQ	2968	2	0.98	0	-	-	-	AEGEPQEES(p)PLK
IPI00413672	BCLAF1	K.AEGEPQEES#PLK.S	0.769231	0	N	H	0.99	0.99	0	3.0462	6442143	4893717	1.32	0.99	HN0_1E1_MSA	3926	2	0.98	0	-	-	-	AEGEPQEES(p)PLK
IPI00413672	BCLAF1	K.AEGEPQEES#PLK.S	0.8	0	N	H	0.96	0.93	0	2.6613	839295	659078	1.27	0.97	HN0_1E2_MSA	3042	2	0.98	0	-	-	-	AEGEPQEES(p)PLK
IPI00413672	BCLAF1	K.AEGEPQEES#PLK.S	0.833333	0	N	H	1	1	0	2.8533	6593091	5371170	1.23	0.99	HN0_1E1_LTQ	4095	2	0.98	0	-	-	-	AEGEPQEES(p)PLK
IPI00413672	BCLAF1	K.AEGEPQEES#PLK.S	0.961538	2	N	H	1	0.99	0	2.5721	2530086	2479849	1.02	1	HN2_1E1_MSA	4368	2	0.98	0	-	-	-	AEGEPQEES(p)PLK
IPI00006079	BCLAF1	K.AEGEPQEES#PLK.S	1	2	N	H	1	1	0	2.6088	9770161	9784933	1	0.99	HN2_1E1_LTQ	4657	2	0.98	0	-	-	-	AEGEPQEES(p)PLK
IPI00413672	BCLAF1	K.AEGEPQEES#PLK.S	1	2	N	H	1	1	0	2.8968	9770161	9784933	1	0.99	HN2_1E1_LTQ	4732	2	0.98	0	-	-	-	AEGEPQEES(p)PLK
IPI00413672	BCLAF1	K.AEGEPQEES#PLK^.S	1	2	N	H	1	1	0	3.1414	9770161	9784933	1	0.99	HN2_1E1_LTQ	4695	2	0.98	0	-	-	-	AEGEPQEES(p)PLK()
IPI00413672	BCLAF1	K.AEGEPQEES#PLK.S	1.24	2	N	L	1	0.99	0	2.665	5343943	4345304	1.23	0.97	LN2_1E1_LTQ	4332	2	0.98	0	-	-	-	AEGEPQEES(p)PLK
IPI00006079	BCLAF1	K.AEGEPQEES#PLK.S	1.24	2	N	L	1	0.99	0	2.665	5343943	4345304	1.23	0.97	LN2_1E1_LTQ	4332	2	0.98	0	-	-	-	AEGEPQEES(p)PLK
IPI00413672	BCLAF1	K.AEGEPQEES#PLK.S	1.28	2	N	L	1	0.99	0	2.6172	3229418	2710110	1.19	0.99	LN2_1E1_MSA	4138	2	0.98	0	-	-	-	AEGEPQEES(p)PLK
IPI00413672	BCLAF1	K.AEGEPQEES#PLK^.S	1.28	2	N	L	1	0.99	0	2.5924	3229418	2710110	1.19	0.99	LN2_1E1_MSA	4189	2	0.98	0	-	-	-	AEGEPQEES(p)PLK()
IPI00006079	BCLAF1	K.AEGEPQEES#PLK^.S	1.28	2	N	L	1	0.99	0	2.5924	3229418	2710110	1.19	0.99	LN2_1E1_MSA	4189	2	0.98	0	-	-	-	AEGEPQEES(p)PLK()
IPI00413672	BCLAF1	K.AEGEPQEES#PLK.S	0.543478	3	N	H	0.99	0.99	0	2.844	12240418	6849011	1.79	0.99	HN3_1E1_LTQ	5204	2	0.98	0	-	-	-	AEGEPQEES(p)PLK
IPI00413672	BCLAF1	K.AEGEPQEES#PLK.S	0.552486	3	N	H	0.99	0.99	0	2.8324	5564230	3109099	1.79	0.99	HN3_1E1_MSA	4288	2	0.98	0	-	-	-	AEGEPQEES(p)PLK
IPI00413672	BCLAF1	K.AEGEPQEES#PLK.S	0.68	3	N	L	0.98	0.96	0	2.8117	4384085	6128858	0.72	0.98	LN3_1E1_LTQ	4729	2	0.98	0	-	-	-	AEGEPQEES(p)PLK
IPI00413672	BCLAF1	K.AEGEPQEES#PLK^.S	0.67	3	N	L	0.99	0.99	0	3.3001	2624301	4113993	0.64	0.97	LN3_1E1_MSA	4277	2	0.98	0	-	-	-	AEGEPQEES(p)PLK()
IPI00413672	BCLAF1	K.AEGEPQEES#PLK^.S	0.68	3	N	L	0.98	0.96	0	2.9698	4384085	6128858	0.72	0.98	LN3_1E1_LTQ	4728	2	0.98	0	-	-	-	AEGEPQEES(p)PLK()
IPI00413672	BCLAF1	K.AEGEPQEES#PLK.S	0.355872	4	N	H	0.99	0.98	0	2.7912	6298800	2187222	2.88	0.93	HN4_1E1_MSA	1480	2	0.98	0	-	-	-	AEGEPQEES(p)PLK
IPI00413672	BCLAF1	K.AEGEPQEES#PLK.S	0.377358	4	N	H	0.99	0.99	0	2.9542	12800337	4878382	2.62	0.97	HN4_1E1_LTQ	5182	2	0.98	0	-	-	-	AEGEPQEES(p)PLK
IPI00006079	BCLAF1	K.AEGEPQEES#PLK.S	0.377358	4	N	H	0.99	0.99	0	2.9542	12800337	4878382	2.62	0.97	HN4_1E1_LTQ	5182	2	0.98	0	-	-	-	AEGEPQEES(p)PLK
IPI00413672	BCLAF1	K.AEGEPQEES#PLK^.S	0.47	4	N	L	1	0.99	0	3.0584	1144767	2436834	0.47	0.98	LN4_1E1_MSA	3731	2	0.98	0	-	-	-	AEGEPQEES(p)PLK()
IPI00006079	BCLAF1	K.AEGEPQEES#PLK^.S	0.47	4	N	L	1	0.99	0	3.0584	1144767	2436834	0.47	0.98	LN4_1E1_MSA	3731	2	0.98	0	-	-	-	AEGEPQEES(p)PLK()
IPI00413672	BCLAF1	K.AEGEPQEES#PLK.S	0.342466	5	N	H	0.99	0.98	0	2.7118	10997735	4046137	2.72	0.99	HN5_1E1_LTQ	2674	2	0.98	0	-	-	-	AEGEPQEES(p)PLK
IPI00413672	BCLAF1	K.AEGEPQEES#PLK.S	0.34965	5	N	H	0.99	0.98	0	2.7383	5701734	2069602	2.75	0.98	HN5_1E1_MSA	2511	2	0.98	0	-	-	-	AEGEPQEES(p)PLK
IPI00413671	BCLAF1	K.AEGEPQEES#PLK.S	0.390625	5	N	H	0.87	0.76	3.40838e-14	2.8677	819454	307318	2.67	0.96	HN5_3E1_MSA	1996	2	0.98	0	-	-	-	AEGEPQEES(p)PLK
IPI00413672	BCLAF1	K.AEGEPQEES#PLK.S	0.458716	5	N	H	0.93	0.87	0	2.8885	525317	223285	2.35	0.97	HN5_2E1_MSA	1499	2	0.98	0	-	-	-	AEGEPQEES(p)PLK
IPI00413672	BCLAF1	K.AEGEPQEES#PLK.S	0.45	5	N	L	0.94	0.88	0	2.99	297085	665387	0.45	0.96	LN5_3E1_MSA	1895	2	0.98	0	-	-	-	AEGEPQEES(p)PLK
IPI00413672	BCLAF1	K.AEGEPQEES#PLK^.S	0.42	5	N	L	0.99	0.98	0	2.9967	1132137	2650965	0.43	0.99	LN5_2E1_LTQ	1822	2	0.98	0	-	-	-	AEGEPQEES(p)PLK()
IPI00413671	BCLAF1	K.AEGEPQEES#PLK^.S	0.44	5	N	L	0.95	0.9	0	2.7415	399672	896436	0.45	0.98	LN5_3E1_LTQ	2155	2	0.98	0	-	-	-	AEGEPQEES(p)PLK()
IPI00413672	BCLAF1	K.AEGEPQEES#PLK^.S	0.47	5	N	L	1	1	0	2.8399	5286301	11565267	0.46	0.97	LN5_1E1_LTQ	2739	2	0.98	0	-	-	-	AEGEPQEES(p)PLK()
IPI00413672	BCLAF1	K.AEGEPQEES#PLK^.S	0.51	5	N	L	0.93	0.86	0	2.5236	218393	461534	0.47	0.96	LN5_1E2_MSA	1827	2	0.98	0	-	-	-	AEGEPQEES(p)PLK()
IPI00413672	BCLAF1	K.AEGEPQEES#PLK^SK^.S	8.33333	2	N	H	0.53	0.28	0.00186594	2.5828	188047	967628	0.19	0.77	HN2_1E1_MSA	4255	2	0.98	19.14	-	-	-	AEGEPQEES(p)PLK()SK()
IPI00413672	BCLAF1	K.AEGEPQEES#PLKSK.S	6.66667	2	N	H	0.48	0.23	0.00247536	2.6664	803200	3944364	0.2	0.95	HN2_1E1_LTQ	4465	2	0.98	34.16	-	-	-	AEGEPQEES(p)PLKSK
IPI00413672	BCLAF1	K.AEGEPQEES#PLKSK.S	0.282995	2	N	L	-1	0	1	2.6605	286309	1011709	0.28	0.3	LN2_1E1_MSA	3990	2	0.98	20.68	-	-	-	AEGEPQEES(p)PLKSK
IPI00006079	BCLAF1	K.AEGEPQEES#PLKSK.S	0.282995	2	N	L	-1	0	1	2.6605	286309	1011709	0.28	0.3	LN2_1E1_MSA	3990	2	0.98	20.68	-	-	-	AEGEPQEES(p)PLKSK
IPI00413672	BCLAF1	K.AEGEPQEES#PLK^SK^.S	3.125	3	N	H	0.65	0.42	0.000222894	2.5763	1099480	2236704	0.49	0.98	HN3_1E1_LTQ	4983	2	0.98	19.14	-	-	-	AEGEPQEES(p)PLK()SK()
IPI00413672	BCLAF1	K.AEGEPQEES#PLKSK.S	3.125	3	N	H	0.65	0.42	0.000222894	2.8409	1099480	2236704	0.49	0.98	HN3_1E1_LTQ	4982	2	0.98	19.09	-	-	-	AEGEPQEES(p)PLKSK
IPI00413672	BCLAF1	K.AEGEPQEES#PLK^SK^.S	0.14	3	N	L	0.27	0.07	0.184271	3.125	208243	684519	0.3	0.57	LN3_1E1_MSA	4131	2	0.98	34.85	-	-	-	AEGEPQEES(p)PLK()SK()
IPI00413672	BCLAF1	K.AEGEPQEES#PLK^SK^.S	0.27	3	N	L	0.51	0.26	0.0178945	2.6507	294860	827720	0.36	0.49	LN3_1E1_LTQ	4533	2	0.98	21.61	-	-	-	AEGEPQEES(p)PLK()SK()
IPI00413672	BCLAF1	K.AEGEPQEES#PLKSK.S	4.54545	4	N	H	0.12	0.01	0.304814	3.131	546144	355751	1.54	0.98	HN4_1E1_MSA	1327	2	0.98	47.1	-	-	-	AEGEPQEES(p)PLKSK
IPI00413672	BCLAF1	K.DLFDYS#PPLHK.N	0.909091	2	N	H	0.99	0.97	0	2.8092	16171900	15073948	1.07	0.95	HN2_1E1_LTQ	9779	2	0.98	8.95	-	-	-	DLFDYS(p)PPLHK
IPI00413672	BCLAF1	K.DLFDYS#PPLHK.N	0.909091	2	N	H	0.99	0.98	0	2.8544	17097065	15774583	1.08	0.95	HN2_1E1_MSA	8542	2	0.98	8.95	-	-	-	DLFDYS(p)PPLHK
IPI00413672	BCLAF1	K.DLFDYS#PPLHK.N	1.24	2	N	L	0.99	0.98	0	2.9672	10244071	8592731	1.19	0.98	LN2_1E1_MSA	8324	2	0.98	8.95	-	-	-	DLFDYS(p)PPLHK
IPI00413672	BCLAF1	K.DLFDYS#PPLHK.N	1.27	2	N	L	0.98	0.97	0	3.0636	14258880	11623300	1.23	0.95	LN2_1E1_LTQ	9282	2	0.98	15.4	-	-	-	DLFDYS(p)PPLHK
IPI00413672	BCLAF1	K.DLFDYS#PPLHK^.N	1.24	2	N	L	0.99	0.98	0	2.9659	10244071	8592731	1.19	0.98	LN2_1E1_MSA	8319	2	0.98	8.95	-	-	-	DLFDYS(p)PPLHK()
IPI00413672	BCLAF1	K.DLFDYS#PPLHK.N	0.5	3	N	H	0.99	0.97	0	2.5786	26792548	13714269	1.95	0.95	HN3_1E1_LTQ	10889	2	0.98	9.82	-	-	-	DLFDYS(p)PPLHK
IPI00006079	BCLAF1	K.DLFDYS#PPLHK.N	0.5	3	N	H	0.99	0.97	0	2.5786	26792548	13714269	1.95	0.95	HN3_1E1_LTQ	10889	2	0.98	9.82	-	-	-	DLFDYS(p)PPLHK
IPI00413672	BCLAF1	K.DLFDYS#PPLHK^.N	0.483092	3	N	H	0.99	0.97	0	3.258	22039888	10759684	2.05	0.96	HN3_1E1_MSA	8744	2	0.98	7.53	-	-	-	DLFDYS(p)PPLHK()
IPI00006079	BCLAF1	K.DLFDYS#PPLHK^.N	0.483092	3	N	H	0.99	0.97	0	3.258	22039888	10759684	2.05	0.96	HN3_1E1_MSA	8744	2	0.98	7.53	-	-	-	DLFDYS(p)PPLHK()
IPI00006079	BCLAF1	K.DLFDYS#PPLHK^.N	0.5	3	N	H	0.99	0.97	0	2.7173	26792548	13714269	1.95	0.95	HN3_1E1_LTQ	10722	2	0.98	10.1	-	-	-	DLFDYS(p)PPLHK()
IPI00413672	BCLAF1	K.DLFDYS#PPLHK^.N	0.5	3	N	H	0.99	0.97	0	2.8778	26792548	13714269	1.95	0.95	HN3_1E1_LTQ	10843	2	0.98	13.36	-	-	-	DLFDYS(p)PPLHK()
IPI00413672	BCLAF1	K.DLFDYS#PPLHK^.N	0.63	3	N	L	0.99	0.98	0	2.624	12906292	20531722	0.63	0.97	LN3_1E1_LTQ	9813	2	0.98	18.69	-	-	-	DLFDYS(p)PPLHK()
IPI00413672	BCLAF1	K.DLFDYS#PPLHK.N	0.289017	4	N	H	0.99	0.99	0	2.5289	41383593	12142200	3.41	0.96	HN4_1E1_MSA	7832	2	0.98	8.95	-	-	-	DLFDYS(p)PPLHK
IPI00006079	BCLAF1	K.DLFDYS#PPLHK.N	0.289017	4	N	H	0.99	0.99	0	2.5289	41383593	12142200	3.41	0.96	HN4_1E1_MSA	7832	2	0.98	8.95	-	-	-	DLFDYS(p)PPLHK
IPI00413672	BCLAF1	K.DLFDYS#PPLHK^.N	0.36	4	N	L	0.99	0.97	0	2.7924	3366459	9145545	0.37	0.98	LN4_1E1_LTQ	9080	2	0.98	10.1	-	-	-	DLFDYS(p)PPLHK()
IPI00413672	BCLAF1	K.DTFEHDPSES#IDEFNK.S	1.1236	2	N	H	0.83	0.69	3.71842e-08	2.939	471018	608174	0.77	0.84	HN2_1E1_MSA	6983	2	0.98	31.44	-	-	-	DTFEHDPSES(p)IDEFNK
IPI00413672	BCLAF1	K.DTFEHDPSES#IDEFNK^.S	1.08696	2	N	H	0.77	0.59	3.57138e-09	2.5096	674036	1034905	0.65	0.86	HN2_1E1_LTQ	8015	2	0.98	13.19	-	-	-	DTFEHDPSES(p)IDEFNK()
IPI00413672	BCLAF1	K.DTFEHDPSES#IDEFNK^.S	1.1236	2	N	H	0.83	0.69	3.71842e-08	3.064	471018	608174	0.77	0.84	HN2_1E1_MSA	7003	2	0.98	1.06	-	-	-	DTFEHDPSES(p)IDEFNK()
IPI00413672	BCLAF1	K.DTFEHDPSES#IDEFNK.S	1.09	2	N	L	0.72	0.51	0.000538059	3.7882	282102	318705	0.89	0.82	LN2_1E1_MSA	6794	2	0.98	25.3	-	-	-	DTFEHDPSES(p)IDEFNK
IPI00006079	BCLAF1	K.DTFEHDPSES#IDEFNK.S	1.09	2	N	L	0.72	0.51	0.000538059	3.7882	282102	318705	0.89	0.82	LN2_1E1_MSA	6794	2	0.98	25.3	-	-	-	DTFEHDPSES(p)IDEFNK
IPI00413672	BCLAF1	K.DTFEHDPSES#IDEFNK.S	0.617284	3	N	H	0.87	0.75	1.107e-11	3.0506	1292360	961931	1.34	0.95	HN3_1E1_LTQ	8736	2	0.98	10.82	-	-	-	DTFEHDPSES(p)IDEFNK
IPI00413672	BCLAF1	K.DTFEHDPSES#IDEFNK.S	0.641026	3	N	H	0.95	0.9	0	2.7331	1088128	717571	1.52	0.99	HN3_1E1_MSA	7030	2	0.98	17.29	-	-	-	DTFEHDPSES(p)IDEFNK
IPI00413672	BCLAF1	K.DTFEHDPSES#IDEFNK^.S	0.64	3	N	L	0.86	0.74	2.96057e-09	2.7502	419571	695680	0.6	0.84	LN3_1E1_LTQ	8007	2	0.98	4.36	-	-	-	DTFEHDPSES(p)IDEFNK()
IPI00413672	BCLAF1	K.DTFEHDPSES#IDEFNK.S	0.598802	4	N	H	0.76	0.58	3.5155e-09	3.6119	1274674	960037	1.33	0.98	HN4_1E1_MSA	6296	2	0.98	15.24	-	-	-	DTFEHDPSES(p)IDEFNK
IPI00006079	BCLAF1	K.DTFEHDPSES#IDEFNK.S	0.598802	4	N	H	0.76	0.58	3.5155e-09	3.6119	1274674	960037	1.33	0.98	HN4_1E1_MSA	6296	2	0.98	15.24	-	-	-	DTFEHDPSES(p)IDEFNK
IPI00413672	BCLAF1	K.FNDS#EGDDTEETEDYR.Q	0.746269	0	N	H	0.99	0.99	0	4.6746	2935369	2176811	1.35	0.99	HN0_1E1_MSA	4971	2	0.98	61	-	-	-	FNDS(p)EGDDTEETEDYR
IPI00413672	BCLAF1	K.FNDS#EGDDTEETEDYR.Q	0.813008	0	N	H	0.99	0.98	0	3.408	2671865	2178212	1.23	0.99	HN0_1E1_LTQ	5507	2	0.98	52.35	-	-	-	FNDS(p)EGDDTEETEDYR
IPI00413672	BCLAF1	K.FNDS#EGDDTEETEDYR@.Q	0.746269	0	N	H	0.99	0.99	0	4.3438	2935369	2176811	1.35	0.99	HN0_1E1_MSA	4984	2	0.98	81.51	-	-	-	FNDS(p)EGDDTEETEDYR()
IPI00413672	BCLAF1	K.FNDS#EGDDTEETEDYR@.Q	0.813008	0	N	H	0.99	0.98	0	4.2011	2671865	2178212	1.23	0.99	HN0_1E1_LTQ	5537	2	0.98	59.03	-	-	-	FNDS(p)EGDDTEETEDYR()
IPI00413672	BCLAF1	K.FNDS#EGDDTEETEDYR.Q	0.826446	2	N	H	1	0.99	0	3.9248	2033703	1696636	1.2	0.99	HN2_1E1_MSA	5511	2	0.98	68.37	-	-	-	FNDS(p)EGDDTEETEDYR
IPI00413672	BCLAF1	K.FNDS#EGDDTEETEDYR.Q	0.877193	2	N	H	0.99	0.99	0	3.9053	3272210	2877317	1.14	0.99	HN2_1E1_LTQ	6183	2	0.98	52.09	-	-	-	FNDS(p)EGDDTEETEDYR
IPI00413672	BCLAF1	K.FNDS#EGDDTEETEDYR@.Q	0.826446	2	N	H	1	0.99	0	4.0588	2033703	1696636	1.2	0.99	HN2_1E1_MSA	5527	2	0.98	76.86	-	-	-	FNDS(p)EGDDTEETEDYR()
IPI00413672	BCLAF1	K.FNDS#EGDDTEETEDYR@.Q	0.877193	2	N	H	0.99	0.99	0	4.1525	3272210	2877317	1.14	0.99	HN2_1E1_LTQ	6147	2	0.98	67.15	-	-	-	FNDS(p)EGDDTEETEDYR()
IPI00413672	BCLAF1	K.FNDS#EGDDTEETEDYR.Q	2.48	2	N	L	0.96	0.92	0	3.6223	631519	238673	2.65	0.97	LN2_1E6_LTQ	3095	2	0.98	47.12	-	-	-	FNDS(p)EGDDTEETEDYR
IPI00413672	BCLAF1	K.FNDS#EGDDTEETEDYR.Q	2.82	2	N	L	0.94	0.88	0	3.9237	753275	269633	2.79	0.98	LN2_1E6_MSA	3227	2	0.98	46.58	-	-	-	FNDS(p)EGDDTEETEDYR
IPI00413672	BCLAF1	K.FNDS#EGDDTEETEDYR@.Q	1.13	2	N	L	0.98	0.96	4.21885e-14	3.8977	1918616	1558795	1.23	0.95	LN2_1E1_LTQ	5711	2	0.98	87.35	-	-	-	FNDS(p)EGDDTEETEDYR()
IPI00006079	BCLAF1	K.FNDS#EGDDTEETEDYR@.Q	1.13	2	N	L	0.98	0.96	4.21885e-14	3.8977	1918616	1558795	1.23	0.95	LN2_1E1_LTQ	5711	2	0.98	87.35	-	-	-	FNDS(p)EGDDTEETEDYR()
IPI00413672	BCLAF1	K.FNDS#EGDDTEETEDYR@.Q	1.19	2	N	L	0.99	0.99	4.91829e-13	3.5041	1641421	1360697	1.21	0.97	LN2_1E1_MSA	5276	2	0.98	57.93	-	-	-	FNDS(p)EGDDTEETEDYR()
IPI00006079	BCLAF1	K.FNDS#EGDDTEETEDYR@.Q	1.19	2	N	L	0.99	0.99	4.91829e-13	3.5041	1641421	1360697	1.21	0.97	LN2_1E1_MSA	5276	2	0.98	57.93	-	-	-	FNDS(p)EGDDTEETEDYR()
IPI00413672	BCLAF1	K.FNDS#EGDDTEETEDYR@.Q	2.48	2	N	L	0.96	0.92	0	3.1936	631519	238673	2.65	0.97	LN2_1E6_LTQ	3089	2	0.98	52.18	-	-	-	FNDS(p)EGDDTEETEDYR()
IPI00413672	BCLAF1	K.FNDS#EGDDTEETEDYR.Q	0.617284	3	N	H	1	0.99	0	4.5177	11694466	7338014	1.59	0.99	HN3_1E1_LTQ	6698	2	0.98	67.3	-	-	-	FNDS(p)EGDDTEETEDYR
IPI00006079	BCLAF1	K.FNDS#EGDDTEETEDYR.Q	0.617284	3	N	H	1	0.99	0	4.5177	11694466	7338014	1.59	0.99	HN3_1E1_LTQ	6698	2	0.98	67.3	-	-	-	FNDS(p)EGDDTEETEDYR
IPI00413672	BCLAF1	K.FNDS#EGDDTEETEDYR.Q	0.625	3	N	H	0.99	0.98	0	4.0335	6760534	4195772	1.61	0.99	HN3_1E1_MSA	5450	2	0.98	72.93	-	-	-	FNDS(p)EGDDTEETEDYR
IPI00413672	BCLAF1	K.FNDS#EGDDTEETEDYR@.Q	0.625	3	N	H	0.99	0.98	0	4.2192	6760534	4195772	1.61	0.99	HN3_1E1_MSA	5409	2	0.98	66.83	-	-	-	FNDS(p)EGDDTEETEDYR()
IPI00413672	BCLAF1	K.FNDS#EGDDTEETEDYR@.Q	0.75	3	N	L	0.97	0.95	6.19163e-10	4.0209	2082411	2364821	0.88	0.98	LN3_1E1_MSA	5385	2	0.98	61.87	-	-	-	FNDS(p)EGDDTEETEDYR()
IPI00413672	BCLAF1	K.FNDS#EGDDTEETEDYR.Q	0.326797	4	N	H	0.99	0.98	0	4.4486	22040061	7247583	3.04	1	HN4_1E1_LTQ	6473	2	0.98	71.06	-	-	-	FNDS(p)EGDDTEETEDYR
IPI00006079	BCLAF1	K.FNDS#EGDDTEETEDYR.Q	0.326797	4	N	H	0.99	0.98	0	4.4486	22040061	7247583	3.04	1	HN4_1E1_LTQ	6473	2	0.98	71.06	-	-	-	FNDS(p)EGDDTEETEDYR
IPI00413672	BCLAF1	K.FNDS#EGDDTEETEDYR.Q	0.333333	4	N	H	1	0.99	1.85185e-13	3.5874	11474862	3949925	2.91	0.99	HN4_1E1_MSA	4931	2	0.98	73.23	-	-	-	FNDS(p)EGDDTEETEDYR
IPI00006079	BCLAF1	K.FNDS#EGDDTEETEDYR.Q	0.333333	4	N	H	1	0.99	1.85185e-13	3.5874	11474862	3949925	2.91	0.99	HN4_1E1_MSA	4931	2	0.98	73.23	-	-	-	FNDS(p)EGDDTEETEDYR
IPI00413672	BCLAF1	K.FNDS#EGDDTEETEDYR.Q	0.704225	4	N	H	0.96	0.92	4.73898e-11	3.9817	321348	209419	1.53	0.98	HN4_1E6_MSA	3294	2	0.98	76.9	-	-	-	FNDS(p)EGDDTEETEDYR
IPI00413672	BCLAF1	K.FNDS#EGDDTEETEDYR.Q	0.39	4	N	L	0.99	0.98	0	3.4916	2553734	5965806	0.43	0.97	LN4_1E1_LTQ	5774	2	0.98	73.89	-	-	-	FNDS(p)EGDDTEETEDYR
IPI00413672	BCLAF1	K.FNDS#EGDDTEETEDYR.Q	0.41	4	N	L	0.98	0.97	6.4766e-12	3.5821	1956565	4140829	0.47	0.99	LN4_1E1_MSA	4902	2	0.98	59.57	-	-	-	FNDS(p)EGDDTEETEDYR
IPI00006079	BCLAF1	K.FNDS#EGDDTEETEDYR.Q	0.41	4	N	L	0.98	0.97	6.4766e-12	3.5821	1956565	4140829	0.47	0.99	LN4_1E1_MSA	4902	2	0.98	59.57	-	-	-	FNDS(p)EGDDTEETEDYR
IPI00413672	BCLAF1	K.FNDS#EGDDTEETEDYR@.Q	0.39	4	N	L	0.99	0.98	0	3.7798	2553734	5965806	0.43	0.97	LN4_1E1_LTQ	5782	2	0.98	72.85	-	-	-	FNDS(p)EGDDTEETEDYR()
IPI00413672	BCLAF1	K.FNDS#EGDDTEETEDYR@.Q	0.41	4	N	L	0.98	0.97	6.4766e-12	4.0571	1956565	4140829	0.47	0.99	LN4_1E1_MSA	4901	2	0.98	62.95	-	-	-	FNDS(p)EGDDTEETEDYR()
IPI00006079	BCLAF1	K.FNDS#EGDDTEETEDYR@.Q	0.41	4	N	L	0.98	0.97	6.4766e-12	4.0571	1956565	4140829	0.47	0.99	LN4_1E1_MSA	4901	2	0.98	62.95	-	-	-	FNDS(p)EGDDTEETEDYR()
IPI00413672	BCLAF1	K.FNDS#EGDDTEETEDYR.Q	0.284091	5	N	H	0.99	0.98	0	4.0781	12751000	3659478	3.48	0.97	HN5_1E1_MSA	3635	2	0.98	76.49	-	-	-	FNDS(p)EGDDTEETEDYR
IPI00413672	BCLAF1	K.FNDS#EGDDTEETEDYR.Q	0.315457	5	N	H	0.98	0.95	0	4.3252	11200661	3400360	3.29	0.93	HN5_1E1_LTQ	4003	2	0.98	72.57	-	-	-	FNDS(p)EGDDTEETEDYR
IPI00413671	BCLAF1	K.FNDS#EGDDTEETEDYR.Q	0.367647	5	N	H	0.67	0.45	2.13348e-05	3.6557	449260	108349	4.15	0.96	HN5_1E2_LTQ	2837	2	0.98	46.06	-	-	-	FNDS(p)EGDDTEETEDYR
IPI00413672	BCLAF1	K.FNDS#EGDDTEETEDYR@.Q	0.284091	5	N	H	0.99	0.98	0	4.4369	12751000	3659478	3.48	0.97	HN5_1E1_MSA	3628	2	0.98	67.79	-	-	-	FNDS(p)EGDDTEETEDYR()
IPI00413672	BCLAF1	K.FNDS#EGDDTEETEDYR@.Q	0.315457	5	N	H	0.98	0.95	0	3.6522	11200661	3400360	3.29	0.93	HN5_1E1_LTQ	3990	2	0.98	56.24	-	-	-	FNDS(p)EGDDTEETEDYR()
IPI00413672	BCLAF1	K.FNDS#EGDDTEETEDYR.Q	0.34	5	N	L	0.99	0.99	0	4.0108	5626633	16219006	0.35	0.99	LN5_1E1_LTQ	3947	2	0.98	29.4	-	-	-	FNDS(p)EGDDTEETEDYR
IPI00413672	BCLAF1	K.FNDS#EGDDTEETEDYR.Q	0.34	5	N	L	0.99	0.99	0	4.3531	3913370	10969661	0.36	0.99	LN5_1E1_MSA	3631	2	0.98	72.03	-	-	-	FNDS(p)EGDDTEETEDYR
IPI00413672	BCLAF1	K.FNDS#EGDDTEETEDYR@.Q	0.28	5	N	L	0.81	0.66	1.86111e-09	3.4742	90268	288502	0.31	0.98	LN5_1E2_MSA	2611	2	0.98	32.11	-	-	-	FNDS(p)EGDDTEETEDYR()
IPI00413672	BCLAF1	K.FNDS#EGDDTEETEDYR@.Q	0.29	5	N	L	0.76	0.58	1.11372e-07	3.7123	90782	267892	0.34	0.95	LN5_1E2_LTQ	2730	2	0.98	50.15	-	-	-	FNDS(p)EGDDTEETEDYR()
IPI00413672	BCLAF1	K.FNDS#EGDDTEETEDYR@.Q	0.34	5	N	L	0.99	0.99	0	4.3088	5626633	16219006	0.35	0.99	LN5_1E1_LTQ	3916	2	0.98	73.92	-	-	-	FNDS(p)EGDDTEETEDYR()
IPI00413672	BCLAF1	K.FNDS#EGDDTEETEDYR@.Q	0.34	5	N	L	0.99	0.99	0	4.6724	3913370	10969661	0.36	0.99	LN5_1E1_MSA	3605	2	0.98	57.64	-	-	-	FNDS(p)EGDDTEETEDYR()
IPI00413672	BCLAF1	K.K^AEGEPQEES#PLK^.S	0.75188	0	N	H	0.99	0.98	0	2.8614	1886907	1437455	1.31	0.99	HN0_1E2_MSA	2688	2	0.98	0	-	-	-	K()AEGEPQEES(p)PLK()
IPI00413672	BCLAF1	K.K^AEGEPQEES#PLK^.S	0.793651	0	N	H	1	1	0	3.0712	10232619	8210806	1.25	0.99	HN0_1E1_LTQ	3797	2	0.98	0	-	-	-	K()AEGEPQEES(p)PLK()
IPI00413672	BCLAF1	K.K^AEGEPQEES#PLK^.S	0.8	0	N	H	1	0.99	0	3.3484	9594508	7587870	1.26	0.97	HN0_1E1_MSA	3624	2	0.98	0	-	-	-	K()AEGEPQEES(p)PLK()
IPI00006079	BCLAF1	K.K^AEGEPQEES#PLK^.S	0.8	0	N	H	1	0.99	0	3.2089	9594508	7587870	1.26	0.97	HN0_1E1_MSA	3679	2	0.98	0	-	-	-	K()AEGEPQEES(p)PLK()
IPI00413672	BCLAF1	K.KAEGEPQEES#PLK.S	0.75188	0	N	H	0.99	0.99	0	2.665	2327549	1734664	1.34	0.99	HN0_1E2_LTQ	2585	2	0.98	0	-	-	-	KAEGEPQEES(p)PLK
IPI00413672	BCLAF1	K.KAEGEPQEES#PLK.S	0.75188	0	N	H	0.99	0.98	0	3.1991	1886907	1437455	1.31	0.99	HN0_1E2_MSA	2696	2	0.98	0	-	-	-	KAEGEPQEES(p)PLK
IPI00413672	BCLAF1	K.KAEGEPQEES#PLK.S	0.78125	0	N	H	0.99	0.99	0	3.0208	4875142	4165948	1.17	0.97	HN0_1E1_MSA	3626	3	0.98	0	-	-	-	KAEGEPQEES(p)PLK
IPI00413672	BCLAF1	K.KAEGEPQEES#PLK.S	0.793651	0	N	H	1	1	0	3.4172	10232619	8210806	1.25	0.99	HN0_1E1_LTQ	3777	2	0.98	0	-	-	-	KAEGEPQEES(p)PLK
IPI00413672	BCLAF1	K.KAEGEPQEES#PLK.S	0.8	0	N	H	1	0.99	0	3.4665	9594508	7587870	1.26	0.97	HN0_1E1_MSA	3678	2	0.98	0	-	-	-	KAEGEPQEES(p)PLK
IPI00006079	BCLAF1	K.KAEGEPQEES#PLK.S	0.8	0	N	H	1	0.99	0	3.4665	9594508	7587870	1.26	0.97	HN0_1E1_MSA	3678	2	0.98	0	-	-	-	KAEGEPQEES(p)PLK
IPI00413672	BCLAF1	K.K^AEGEPQEES#PLK^.S	0.806452	2	N	H	0.96	0.92	0	2.5757	290478	239505	1.21	0.98	HN2_1E6_MSA	1917	2	0.98	0	-	-	-	K()AEGEPQEES(p)PLK()
IPI00413672	BCLAF1	K.K^AEGEPQEES#PLK^.S	0.934579	2	N	H	1	1	0	3.2	7267921	6868850	1.06	0.99	HN2_1E1_MSA	4204	2	0.98	0	-	-	-	K()AEGEPQEES(p)PLK()
IPI00413672	BCLAF1	K.K^AEGEPQEES#PLK^.S	0.943396	2	N	H	1	1	0	2.7792	23965206	22538354	1.06	1	HN2_1E1_LTQ	4417	2	0.98	0	-	-	-	K()AEGEPQEES(p)PLK()
IPI00413672	BCLAF1	K.KAEGEPQEES#PLK.S	0.806452	2	N	H	0.96	0.92	0	3.0648	290478	239505	1.21	0.98	HN2_1E6_MSA	1920	2	0.98	0	-	-	-	KAEGEPQEES(p)PLK
IPI00413672	BCLAF1	K.KAEGEPQEES#PLK.S	0.892857	2	N	H	0.99	0.99	0	3.1997	7135156	7070850	1.01	1	HN2_1E1_LTQ	4439	3	0.98	0	-	-	-	KAEGEPQEES(p)PLK
IPI00413672	BCLAF1	K.KAEGEPQEES#PLK.S	0.934579	2	N	H	1	1	0	3.613	7267921	6868850	1.06	0.99	HN2_1E1_MSA	4193	2	0.98	0	-	-	-	KAEGEPQEES(p)PLK
IPI00413672	BCLAF1	K.KAEGEPQEES#PLK.S	0.943396	2	N	H	1	1	0	3.2422	23965206	22538354	1.06	1	HN2_1E1_LTQ	4429	2	0.98	0	-	-	-	KAEGEPQEES(p)PLK
IPI00413672	BCLAF1	K.K^AEGEPQEES#PLK^.S	1.21	2	N	L	1	0.99	0	2.7507	16801162	13710603	1.23	0.99	LN2_1E1_LTQ	4238	2	0.98	0	-	-	-	K()AEGEPQEES(p)PLK()
IPI00413672	BCLAF1	K.K^AEGEPQEES#PLK^.S	1.29	2	N	L	1	1	0	3.1891	11254808	8923864	1.26	1	LN2_1E1_MSA	4036	2	0.98	0	-	-	-	K()AEGEPQEES(p)PLK()
IPI00006079	BCLAF1	K.K^AEGEPQEES#PLK^.S	1.29	2	N	L	1	1	0	3.1891	11254808	8923864	1.26	1	LN2_1E1_MSA	4036	2	0.98	0	-	-	-	K()AEGEPQEES(p)PLK()
IPI00413672	BCLAF1	K.K^AEGEPQEES#PLK^.S	3.25	2	N	L	0.98	0.96	0	3.2014	1679033	527165	3.19	0.99	LN2_1E6_MSA	1945	2	0.98	0	-	-	-	K()AEGEPQEES(p)PLK()
IPI00413672	BCLAF1	K.KAEGEPQEES#PLK.S	1.21	2	N	L	1	0.99	0	3.1383	16801162	13710603	1.23	0.99	LN2_1E1_LTQ	4152	2	0.98	0	-	-	-	KAEGEPQEES(p)PLK
IPI00006079	BCLAF1	K.KAEGEPQEES#PLK.S	1.21	2	N	L	1	0.99	0	2.8885	16801162	13710603	1.23	0.99	LN2_1E1_LTQ	4228	2	0.98	0	-	-	-	KAEGEPQEES(p)PLK
IPI00413672	BCLAF1	K.KAEGEPQEES#PLK.S	1.22	2	N	L	0.95	0.9	1.77636e-15	2.7427	194338	156372	1.24	0.94	LN2_1E2_MSA	1867	2	0.98	0	-	-	-	KAEGEPQEES(p)PLK
IPI00413672	BCLAF1	K.KAEGEPQEES#PLK.S	1.29	2	N	L	1	1	0	3.3159	11254808	8923864	1.26	1	LN2_1E1_MSA	3982	2	0.98	0	-	-	-	KAEGEPQEES(p)PLK
IPI00006079	BCLAF1	K.KAEGEPQEES#PLK.S	1.29	2	N	L	1	1	0	3.3159	11254808	8923864	1.26	1	LN2_1E1_MSA	3982	2	0.98	0	-	-	-	KAEGEPQEES(p)PLK
IPI00413672	BCLAF1	K.KAEGEPQEES#PLK.S	3.25	2	N	L	0.98	0.96	0	2.9337	1679033	527165	3.19	0.99	LN2_1E6_MSA	1911	2	0.98	0	-	-	-	KAEGEPQEES(p)PLK
IPI00413672	BCLAF1	K.KAEGEPQEES#PLK.S	3.36	2	N	L	0.98	0.96	0	2.821	1724502	506866	3.4	0.98	LN2_1E6_LTQ	1794	2	0.98	0	-	-	-	KAEGEPQEES(p)PLK
IPI00413672	BCLAF1	K.K^AEGEPQEES#PLK^.S	0.485437	3	N	H	0.99	0.98	0	2.6155	3010689	1533461	1.96	1	HN3_1E2_LTQ	2954	2	0.98	0	-	-	-	K()AEGEPQEES(p)PLK()
IPI00413672	BCLAF1	K.K^AEGEPQEES#PLK^.S	0.510204	3	N	H	1	1	0	2.821	27718096	14413038	1.92	0.99	HN3_1E1_LTQ	4957	2	0.98	0	-	-	-	K()AEGEPQEES(p)PLK()
IPI00413672	BCLAF1	K.K^AEGEPQEES#PLK^.S	0.531915	3	N	H	1	1	0	3.2503	14690993	7902222	1.86	1	HN3_1E1_MSA	4176	2	0.98	0	-	-	-	K()AEGEPQEES(p)PLK()
IPI00413672	BCLAF1	K.KAEGEPQEES#PLK.S	0.485437	3	N	H	0.99	0.98	0	3.017	3010689	1533461	1.96	1	HN3_1E2_LTQ	2932	2	0.98	0	-	-	-	KAEGEPQEES(p)PLK
IPI00006079	BCLAF1	K.KAEGEPQEES#PLK.S	0.531915	3	N	H	1	1	0	3.3555	14690993	7902222	1.86	1	HN3_1E1_MSA	4165	2	0.98	0	-	-	-	KAEGEPQEES(p)PLK
IPI00413672	BCLAF1	K.KAEGEPQEES#PLK.S	0.531915	3	N	H	1	1	0	3.3728	14690993	7902222	1.86	1	HN3_1E1_MSA	4234	2	0.98	0	-	-	-	KAEGEPQEES(p)PLK
IPI00413672	BCLAF1	K.KAEGEPQEES#PLK.S	1.02041	3	N	H	0.98	0.95	0	3.0916	583472	591409	0.99	0.99	HN3_1E6_LTQ	1799	2	0.98	0	-	-	-	KAEGEPQEES(p)PLK
IPI00413672	BCLAF1	K.KAEGEPQEES#PLK.S	11.1111	3	N	H	0.14	0.02	0.147125	2.6866	327123	508422	0.64	0.39	HN3_1E6_MSA	1340	2	0.98	0	-	-	-	KAEGEPQEES(p)PLK
IPI00413672	BCLAF1	K.K^AEGEPQEES#PLK^.S	0.7	3	N	L	1	1	0	2.6424	8935878	12798767	0.7	0.99	LN3_1E1_LTQ	4604	2	0.98	0	-	-	-	K()AEGEPQEES(p)PLK()
IPI00413672	BCLAF1	K.K^AEGEPQEES#PLK^.S	0.7	3	N	L	1	0.99	0	3.2554	5990371	8629529	0.69	1	LN3_1E1_MSA	4189	2	0.98	0	-	-	-	K()AEGEPQEES(p)PLK()
IPI00413672	BCLAF1	K.K^AEGEPQEES#PLK^.S	1.22	3	N	L	0.98	0.96	0	2.6393	965168	731067	1.32	0.98	LN3_1E6_LTQ	1823	2	0.98	0	-	-	-	K()AEGEPQEES(p)PLK()
IPI00413672	BCLAF1	K.K^AEGEPQEES#PLK^.S	1.24	3	N	L	0.99	0.98	0	2.8673	717662	578972	1.24	0.98	LN3_1E6_MSA	1748	2	0.98	0	-	-	-	K()AEGEPQEES(p)PLK()
IPI00413672	BCLAF1	K.KAEGEPQEES#PLK.S	0.7	3	N	L	1	1	0	3.1285	8935878	12798767	0.7	0.99	LN3_1E1_LTQ	4551	2	0.98	0	-	-	-	KAEGEPQEES(p)PLK
IPI00413672	BCLAF1	K.KAEGEPQEES#PLK.S	0.7	3	N	L	1	0.99	0	3.5087	5990371	8629529	0.69	1	LN3_1E1_MSA	4126	2	0.98	0	-	-	-	KAEGEPQEES(p)PLK
IPI00413672	BCLAF1	K.KAEGEPQEES#PLK.S	1.24	3	N	L	0.99	0.98	0	2.5784	717662	578972	1.24	0.98	LN3_1E6_MSA	1728	2	0.98	0	-	-	-	KAEGEPQEES(p)PLK
IPI00413672	BCLAF1	K.KAEGEPQEES#PLK.S	0.330033	4	N	H	0.95	0.91	0	2.846	2969694	934009	3.18	0.98	HN4_1E2_LTQ	1138	2	0.98	0	-	-	-	KAEGEPQEES(p)PLK
IPI00413672	BCLAF1	K.KAEGEPQEES#PLK.S	0.338983	4	N	H	0.97	0.94	0	3.3897	1729984	571985	3.02	0.97	HN4_1E2_MSA	565	2	0.98	0	-	-	-	KAEGEPQEES(p)PLK
IPI00006079	BCLAF1	K.KAEGEPQEES#PLK.S	0.347222	4	N	H	1	0.99	0	2.7714	36285432	12514365	2.9	0.94	HN4_1E1_LTQ	4865	2	0.98	0	-	-	-	KAEGEPQEES(p)PLK
IPI00413672	BCLAF1	K.KAEGEPQEES#PLK.S	0.347222	4	N	H	1	0.99	0	3.1386	36285432	12514365	2.9	0.94	HN4_1E1_LTQ	4930	2	0.98	0	-	-	-	KAEGEPQEES(p)PLK
IPI00413672	BCLAF1	K.KAEGEPQEES#PLK.S	0.355872	4	N	H	1	0.99	0	3.4911	14522551	5061282	2.87	1	HN4_1E1_MSA	1233	2	0.98	0	-	-	-	KAEGEPQEES(p)PLK
IPI00413672	BCLAF1	K.K^AEGEPQEES#PLK^.S	0.43	4	N	L	0.99	0.98	0	2.7615	1282728	3001079	0.43	0.98	LN4_1E2_LTQ	2576	2	0.98	0	-	-	-	K()AEGEPQEES(p)PLK()
IPI00006079	BCLAF1	K.K^AEGEPQEES#PLK^.S	0.45	4	N	L	1	1	0	3.1922	2231230	5015964	0.44	0.99	LN4_1E1_MSA	3602	2	0.98	0	-	-	-	K()AEGEPQEES(p)PLK()
IPI00413672	BCLAF1	K.K^AEGEPQEES#PLK^.S	0.45	4	N	L	1	1	0	3.238	2231230	5015964	0.44	0.99	LN4_1E1_MSA	3656	2	0.98	0	-	-	-	K()AEGEPQEES(p)PLK()
IPI00413672	BCLAF1	K.K^AEGEPQEES#PLK^.S	0.48	4	N	L	1	1	0	2.6014	3429698	7493479	0.46	0.99	LN4_1E1_LTQ	4229	2	0.98	0	-	-	-	K()AEGEPQEES(p)PLK()
IPI00413672	BCLAF1	K.KAEGEPQEES#PLK.S	0.43	4	N	L	0.99	0.98	0	2.9219	1282728	3001079	0.43	0.98	LN4_1E2_LTQ	2553	2	0.98	0	-	-	-	KAEGEPQEES(p)PLK
IPI00413672	BCLAF1	K.KAEGEPQEES#PLK.S	0.45	4	N	L	0.99	0.98	0	2.6302	823393	1854870	0.44	0.98	LN4_1E2_MSA	2431	2	0.98	0	-	-	-	KAEGEPQEES(p)PLK
IPI00413671	BCLAF1	K.K^AEGEPQEES#PLK^.S	0.452489	5	N	H	0.82	0.67	1.04057e-10	2.6643	546219	233869	2.34	0.95	HN5_8E1_MSA	1937	2	0.98	0	-	-	-	K()AEGEPQEES(p)PLK()
IPI00413672	BCLAF1	K.KAEGEPQEES#PLK.S	0.421941	5	N	H	0.8	0.64	3.48199e-07	2.8751	581202	186651	3.11	0.95	HN5_8E1_LTQ	2207	2	0.98	0	-	-	-	KAEGEPQEES(p)PLK
IPI00413671	BCLAF1	K.KAEGEPQEES#PLK.S	0.452489	5	N	H	0.82	0.67	1.04057e-10	2.567	546219	233869	2.34	0.95	HN5_8E1_MSA	1923	2	0.98	0	-	-	-	KAEGEPQEES(p)PLK
IPI00413672	BCLAF1	K.K^AEGEPQEES#PLK^.S	0.42	5	N	L	0.99	0.98	0	2.7275	431352	1011302	0.43	0.97	LN5_7E1_MSA	1735	2	0.98	0	-	-	-	K()AEGEPQEES(p)PLK()
IPI00413672	BCLAF1	K.K^AEGEPQEES#PLK^.S	0.43	5	N	L	0.98	0.96	0	2.6264	439403	1076471	0.41	0.95	LN5_7E1_LTQ	1830	2	0.98	0	-	-	-	K()AEGEPQEES(p)PLK()
IPI00413672	BCLAF1	K.KAEGEPQEES#PLK.S	0.42	5	N	L	0.99	0.98	0	3.2594	431352	1011302	0.43	0.97	LN5_7E1_MSA	1738	2	0.98	0	-	-	-	KAEGEPQEES(p)PLK
IPI00413672	BCLAF1	K.KAEGEPQEES#PLK.S	0.43	5	N	L	0.98	0.96	0	2.5844	439403	1076471	0.41	0.95	LN5_7E1_LTQ	1832	2	0.98	0	-	-	-	KAEGEPQEES(p)PLK
IPI00413672	BCLAF1	K.KAEGEPQEES#PLKSK.S	1.28	2	N	L	0.97	0.95	4.34007e-11	2.8674	396432	326777	1.21	0.96	LN2_1E1_LTQ	4138	2	0.98	14.48	-	-	-	KAEGEPQEES(p)PLKSK
IPI00006079	BCLAF1	K.KAEGEPQEES#PLKSK.S	1.28	2	N	L	0.97	0.95	4.34007e-11	2.8674	396432	326777	1.21	0.96	LN2_1E1_LTQ	4138	2	0.98	14.48	-	-	-	KAEGEPQEES(p)PLKSK
IPI00413672	BCLAF1	K.KAEGEPQEES#PLKSK.S	1.29	2	N	L	0.99	0.99	3.33067e-16	3.1082	3283181	2625219	1.25	0.99	LN2_1E1_LTQ	4111	3	0.98	15.01	-	-	-	KAEGEPQEES(p)PLKSK
IPI00413672	BCLAF1	K.K^AEGEPQEES#PLK^SK^.S	0.69	3	N	L	1	0.99	1.11022e-16	3.3285	2013639	3138109	0.64	0.98	LN3_1E1_LTQ	4583	3	0.98	13.12	-	-	-	K()AEGEPQEES(p)PLK()SK()
IPI00413672	BCLAF1	K.KAEGEPQEES#PLKSK.S	0.326797	4	N	H	0.98	0.96	0	4.4276	2907623	1038912	2.8	1	HN4_1E1_MSA	1334	3	0.98	20.45	-	-	-	KAEGEPQEES(p)PLKSK
IPI00006079	BCLAF1	K.KAEGEPQEES#PLKSK.S	0.326797	4	N	H	0.98	0.96	0	4.4276	2907623	1038912	2.8	1	HN4_1E1_MSA	1334	3	0.98	20.45	-	-	-	KAEGEPQEES(p)PLKSK
IPI00413672	BCLAF1	K.K^AEGEPQEES#PLK^SK^.S	0.381679	5	N	H	0.99	0.98	1.53211e-13	3.3959	4384937	1800695	2.44	0.98	HN5_9E1_MSA	2113	3	0.98	28.25	-	-	-	K()AEGEPQEES(p)PLK()SK()
IPI00413672	BCLAF1	K.KAEGEPQEES#PLKSK.S	0.381679	5	N	H	0.99	0.98	1.53211e-13	3.7365	4384937	1800695	2.44	0.98	HN5_9E1_MSA	2143	3	0.98	28.38	-	-	-	KAEGEPQEES(p)PLKSK
IPI00413671	BCLAF1	K.KAEGEPQEES#PLKSK.S	0.398406	5	N	H	0.99	0.98	0	3.1411	9735499	4120927	2.36	0.96	HN5_9E1_LTQ	2426	3	0.98	11.5	-	-	-	KAEGEPQEES(p)PLKSK
IPI00413672	BCLAF1	K.KAEGEPQEESPLKS#K.S	0.307692	4	N	H	0.97	0.95	1.42442e-13	3.1977	1611815	470311	3.43	0.96	HN4_1E1_LTQ	5127	2	0.98	3.91	-	-	-	KAEGEPQEESPLKS(p)K
IPI00413672	BCLAF1	K.K^ETQS#PEQVK^.S	0.990099	2	N	H	0.86	0.74	0	2.5706	5051824	4576329	1.1	0.5	HN2_1E1_LTQ	1266	2	0.98	9.34	-	-	-	K()ETQS(p)PEQVK()
IPI00413672	BCLAF1	K.K^ETQS#PEQVK^.S	1.25	2	N	H	0.76	0.57	1.17964e-09	2.5826	2761489	2607195	1.06	0.72	HN2_1E1_MSA	1050	2	0.98	24.63	-	-	-	K()ETQS(p)PEQVK()
IPI00413672	BCLAF1	K.KETQS#PEQVK.S	1.25	2	N	H	0.76	0.57	1.17964e-09	2.9123	2761489	2607195	1.06	0.72	HN2_1E1_MSA	1008	2	0.98	5.96	-	-	-	KETQS(p)PEQVK
IPI00413672	BCLAF1	K.KETQS#PEQVK.S	0.69	2	N	L	0.58	0.34	6.58085e-12	2.6288	3713201	2845834	1.3	0.45	LN2_1E1_MSA	1238	2	0.98	4.31	-	-	-	KETQS(p)PEQVK
IPI00413672	BCLAF1	K.KETQS#PEQVK.S	1.2	2	N	L	0.92	0.84	0	2.5023	3498218	2682453	1.3	0.95	LN2_1E1_LTQ	793	2	0.98	15.13	-	-	-	KETQS(p)PEQVK
IPI00413672	BCLAF1	K.K^ETQS#PEQVK^.S	0.606061	3	N	H	0.89	0.79	1.11022e-16	2.6093	7569144	3470629	2.18	0.85	HN3_1E1_MSA	1131	2	0.98	26.17	-	-	-	K()ETQS(p)PEQVK()
IPI00413672	BCLAF1	K.KETQS#PEQVK.S	0.543478	3	N	H	0.96	0.92	0	2.6626	11775923	5777545	2.04	0.66	HN3_1E1_LTQ	1408	2	0.98	16.87	-	-	-	KETQS(p)PEQVK
IPI00413672	BCLAF1	K.KETQS#PEQVK.S	0.606061	3	N	H	0.89	0.79	1.11022e-16	2.7761	7569144	3470629	2.18	0.85	HN3_1E1_MSA	1126	2	0.98	23.54	-	-	-	KETQS(p)PEQVK
IPI00413672	BCLAF1	K.K^ETQS#PEQVK^.S	0.36	3	N	L	0.5	0.25	8.04643e-09	2.5834	2099556	2911079	0.72	0.55	LN3_1E1_LTQ	2195	2	0.98	13.7	-	-	-	K()ETQS(p)PEQVK()
IPI00413672	BCLAF1	K.KETQS#PEQVK.S	0.47	3	N	L	0.63	0.4	3.77476e-15	2.5263	3331632	4803743	0.69	0.67	LN3_1E1_LTQ	1832	2	0.98	25.61	-	-	-	KETQS(p)PEQVK
IPI00413672	BCLAF1	K.KETQS#PEQVK.S	0.47	3	N	L	0.63	0.4	0	2.6641	3998784	5980858	0.67	0.44	LN3_1E1_MSA	1684	2	0.98	6.36	-	-	-	KETQS(p)PEQVK
IPI00413672	BCLAF1	K.KETQS#PEQVK.S	0.291545	4	N	H	0.99	0.99	0	2.5033	2535682	738101	3.44	0.99	HN4_1E1_MSA	328	2	0.98	25.98	-	-	-	KETQS(p)PEQVK
IPI00413672	BCLAF1	K.K^ETQS#PEQVK^.S	0.33	4	N	L	0.79	0.63	3.2141e-13	2.764	210915	574697	0.37	0.89	LN4_1E1_MSA	400	2	0.98	17.63	-	-	-	K()ETQS(p)PEQVK()
IPI00413672	BCLAF1	K.LK^DLFDYS#PPLHK^.N	0.925926	0	N	H	0.92	0.85	0	3.1602	2797704	2436509	1.15	0.96	HN0_1E1_LTQ	8319	2	0.98	13.33	-	-	-	LK()DLFDYS(p)PPLHK()
IPI00413672	BCLAF1	K.LKDLFDYS#PPLHK.N	0.925926	0	N	H	0.92	0.85	0	2.8972	2797704	2436509	1.15	0.96	HN0_1E1_LTQ	8370	2	0.98	19.85	-	-	-	LKDLFDYS(p)PPLHK
IPI00413672	BCLAF1	K.LKDLFDYS#PPLHK.N	0.925926	0	N	H	0.94	0.89	0	3.1862	2186291	1726688	1.27	0.96	HN0_1E1_MSA	6958	2	0.98	14.24	-	-	-	LKDLFDYS(p)PPLHK
IPI00413672	BCLAF1	K.LKDLFDYS#PPLHK.N	1.20482	0	N	H	0.92	0.85	0	3.4621	1905399	2282905	0.83	0.94	HN0_1E2_MSA	6200	2	0.98	10.03	-	-	-	LKDLFDYS(p)PPLHK
IPI00413672	BCLAF1	K.LK^DLFDYS#PPLHK^.N	0.934579	2	N	H	0.99	0.98	0	2.915	21550573	20575765	1.05	0.94	HN2_1E1_LTQ	9774	2	0.98	8.41	-	-	-	LK()DLFDYS(p)PPLHK()
IPI00413672	BCLAF1	K.LK^DLFDYS#PPLHK^.N	0.961538	2	N	H	0.99	0.99	0	3.5997	19471972	18987087	1.03	0.95	HN2_1E1_MSA	8432	2	0.98	11.9	-	-	-	LK()DLFDYS(p)PPLHK()
IPI00006079	BCLAF1	K.LKDLFDYS#PPLHK.N	0.934579	2	N	H	0.99	0.98	0	2.8181	21550573	20575765	1.05	0.94	HN2_1E1_LTQ	9583	2	0.98	10.97	-	-	-	LKDLFDYS(p)PPLHK
IPI00413672	BCLAF1	K.LKDLFDYS#PPLHK.N	0.934579	2	N	H	0.99	0.98	0	3.0953	21550573	20575765	1.05	0.94	HN2_1E1_LTQ	9702	2	0.98	12.32	-	-	-	LKDLFDYS(p)PPLHK
IPI00413672	BCLAF1	K.LKDLFDYS#PPLHK.N	0.961538	2	N	H	0.99	0.99	0	3.2004	19471972	18987087	1.03	0.95	HN2_1E1_MSA	8394	2	0.98	8.35	-	-	-	LKDLFDYS(p)PPLHK
IPI00413672	BCLAF1	K.LK^DLFDYS#PPLHK^.N	1.22	2	N	L	0.99	0.99	0	3.5252	17722117	15062513	1.18	0.98	LN2_1E1_LTQ	9181	2	0.98	13.97	-	-	-	LK()DLFDYS(p)PPLHK()
IPI00413672	BCLAF1	K.LK^DLFDYS#PPLHK^.N	1.22	2	N	L	0.99	0.98	0	3.4074	13250685	10886615	1.22	0.97	LN2_1E1_MSA	8209	2	0.98	11.07	-	-	-	LK()DLFDYS(p)PPLHK()
IPI00006079	BCLAF1	K.LK^DLFDYS#PPLHK^.N	1.22	2	N	L	0.99	0.98	0	3.3849	13250685	10886615	1.22	0.97	LN2_1E1_MSA	8260	2	0.98	16.76	-	-	-	LK()DLFDYS(p)PPLHK()
IPI00413672	BCLAF1	K.LKDLFDYS#PPLHK.N	1.22	2	N	L	0.99	0.99	0	3.0591	17722117	15062513	1.18	0.98	LN2_1E1_LTQ	9200	2	0.98	16.77	-	-	-	LKDLFDYS(p)PPLHK
IPI00006079	BCLAF1	K.LKDLFDYS#PPLHK.N	1.22	2	N	L	0.99	0.99	0	3.0591	17722117	15062513	1.18	0.98	LN2_1E1_LTQ	9200	2	0.98	16.77	-	-	-	LKDLFDYS(p)PPLHK
IPI00413672	BCLAF1	K.LKDLFDYS#PPLHK.N	1.22	2	N	L	0.99	0.98	0	3.2686	13250685	10886615	1.22	0.97	LN2_1E1_MSA	8189	2	0.98	14.81	-	-	-	LKDLFDYS(p)PPLHK
IPI00006079	BCLAF1	K.LKDLFDYS#PPLHK.N	1.22	2	N	L	0.99	0.98	0	2.8101	13250685	10886615	1.22	0.97	LN2_1E1_MSA	8243	2	0.98	16.77	-	-	-	LKDLFDYS(p)PPLHK
IPI00413672	BCLAF1	K.LK^DLFDYS#PPLHK^.N	0.444444	3	N	H	0.99	0.97	0	3.8152	13887636	6538827	2.12	0.95	HN3_1E1_MSA	8641	2	0.98	13.87	-	-	-	LK()DLFDYS(p)PPLHK()
IPI00006079	BCLAF1	K.LK^DLFDYS#PPLHK^.N	0.444444	3	N	H	0.99	0.97	0	3.8152	13887636	6538827	2.12	0.95	HN3_1E1_MSA	8641	2	0.98	13.87	-	-	-	LK()DLFDYS(p)PPLHK()
IPI00413672	BCLAF1	K.LK^DLFDYS#PPLHK^.N	0.471698	3	N	H	0.98	0.96	0	3.3157	16253487	8115202	2	0.94	HN3_1E1_LTQ	10604	2	0.98	7.17	-	-	-	LK()DLFDYS(p)PPLHK()
IPI00413672	BCLAF1	K.LK^DLFDYS#PPLHK^.N	0.537634	3	N	H	0.96	0.91	0	3.7149	3934525	1905902	2.06	0.97	HN3_1E2_MSA	5855	2	0.98	21.17	-	-	-	LK()DLFDYS(p)PPLHK()
IPI00006079	BCLAF1	K.LKDLFDYS#PPLHK.N	0.444444	3	N	H	0.99	0.97	0	3.3242	13887636	6538827	2.12	0.95	HN3_1E1_MSA	8558	2	0.98	18.69	-	-	-	LKDLFDYS(p)PPLHK
IPI00413672	BCLAF1	K.LKDLFDYS#PPLHK.N	0.444444	3	N	H	0.99	0.97	0	3.6286	13887636	6538827	2.12	0.95	HN3_1E1_MSA	8665	2	0.98	12.81	-	-	-	LKDLFDYS(p)PPLHK
IPI00413672	BCLAF1	K.LKDLFDYS#PPLHK.N	0.471698	3	N	H	0.98	0.96	0	3.1265	16253487	8115202	2	0.94	HN3_1E1_LTQ	10583	2	0.98	14.39	-	-	-	LKDLFDYS(p)PPLHK
IPI00413672	BCLAF1	K.LK^DLFDYS#PPLHK^.N	0.59	3	N	L	0.99	0.98	0	3.6158	7159735	11818798	0.61	0.97	LN3_1E1_MSA	8298	2	0.98	12.23	-	-	-	LK()DLFDYS(p)PPLHK()
IPI00413672	BCLAF1	K.LK^DLFDYS#PPLHK^.N	0.62	3	N	L	0.99	0.99	0	3.3585	9620433	16257856	0.59	0.93	LN3_1E1_LTQ	9694	2	0.98	11.9	-	-	-	LK()DLFDYS(p)PPLHK()
IPI00413672	BCLAF1	K.LKDLFDYS#PPLHK.N	0.59	3	N	L	0.99	0.98	0	3.18	7159735	11818798	0.61	0.97	LN3_1E1_MSA	8380	2	0.98	12.33	-	-	-	LKDLFDYS(p)PPLHK
IPI00413672	BCLAF1	K.LKDLFDYS#PPLHK.N	0.25641	4	N	H	0.93	0.86	0	3.6274	15493437	4549629	3.41	0.96	HN4_1E2_MSA	5694	2	0.98	6.45	-	-	-	LKDLFDYS(p)PPLHK
IPI00413672	BCLAF1	K.LKDLFDYS#PPLHK.N	0.26455	4	N	H	0.98	0.97	0	3.4162	29462523	8225388	3.58	0.97	HN4_1E1_MSA	7834	2	0.98	12.23	-	-	-	LKDLFDYS(p)PPLHK
IPI00006079	BCLAF1	K.LKDLFDYS#PPLHK.N	0.26455	4	N	H	0.98	0.97	0	3.4162	29462523	8225388	3.58	0.97	HN4_1E1_MSA	7834	2	0.98	12.23	-	-	-	LKDLFDYS(p)PPLHK
IPI00413672	BCLAF1	K.LK^DLFDYS#PPLHK^.N	0.32	4	N	L	0.96	0.92	0	2.5983	1066441	3102368	0.34	0.94	LN4_1E1_LTQ	8857	2	0.98	10.78	-	-	-	LK()DLFDYS(p)PPLHK()
IPI00413672	BCLAF1	K.LK^DLFDYS#PPLHK^.N	0.33	4	N	L	0.95	0.9	0	2.7995	959020	2600393	0.37	0.94	LN4_1E1_MSA	7630	2	0.98	9.75	-	-	-	LK()DLFDYS(p)PPLHK()
IPI00006079	BCLAF1	K.LK^DLFDYS#PPLHK^.N	0.33	4	N	L	0.95	0.9	0	2.7995	959020	2600393	0.37	0.94	LN4_1E1_MSA	7630	2	0.98	9.75	-	-	-	LK()DLFDYS(p)PPLHK()
IPI00413672	BCLAF1	K.LK^DLFDYS#PPLHK^.N	0.34	4	N	L	0.94	0.89	0	3.6225	619721	1891375	0.33	0.96	LN4_1E2_MSA	6018	2	0.98	18.09	-	-	-	LK()DLFDYS(p)PPLHK()
IPI00413672	BCLAF1	K.LKDLFDYS#PPLHK.N	0.38	4	N	L	0.99	0.98	0	3.1271	3916364	10399492	0.38	0.98	LN4_1E2_MSA	5973	3	0.98	12.99	-	-	-	LKDLFDYS(p)PPLHK
IPI00413672	BCLAF1	K.LK^DLFDYS#PPLHK^.N	0.248756	5	N	H	0.99	0.98	0	3.6408	5433995	1369924	3.97	0.96	HN5_9E1_MSA	3972	2	0.98	16.45	-	-	-	LK()DLFDYS(p)PPLHK()
IPI00413671	BCLAF1	K.LK^DLFDYS#PPLHK^.N	0.31	5	N	L	0.79	0.63	8.70287e-09	2.6659	93244	282645	0.33	0.87	LN5_9E1_LTQ	3727	2	0.98	15.4	-	-	-	LK()DLFDYS(p)PPLHK()
IPI00413672	BCLAF1	K.S#QEEPK^DTFEHDPSESIDEFNK^.S	1.19048	3	N	H	0.89	0.79	5.74563e-12	3.0906	1540849	1635679	0.94	0.9	HN3_1E1_MSA	7466	3	0.98	9.2	-	-	-	S(p)QEEPK()DTFEHDPSESIDEFNK()
IPI00413672	BCLAF1	R.AEGEWEDQEALDYFS#DKESGK.Q	0.378788	4	N	H	0.89	0.79	2.88658e-14	3.2709	2705322	956171	2.83	0.95	HN4_1E1_MSA	8238	3	0.98	1.73	-	-	-	AEGEWEDQEALDYFS(p)DKESGK
IPI00413672	BCLAF1	R.R@IDIS#PSTLR@.K	0.854701	0	N	H	0.99	0.98	0	2.7042	8277117	6920375	1.2	0.99	HN0_1E2_MSA	4896	2	0.98	11.06	-	-	-	R()IDIS(p)PSTLR()
IPI00413672	BCLAF1	R.R@IDIS#PSTLR@.K	0.980392	2	N	H	1	1	0	2.6806	17045970	16285178	1.05	0.99	HN2_1E1_MSA	6687	2	0.98	7.04	-	-	-	R()IDIS(p)PSTLR()
IPI00413672	BCLAF1	R.RIDIS#PSTLR.K	0.980392	2	N	H	1	1	0	2.6104	17045970	16285178	1.05	0.99	HN2_1E1_MSA	6625	2	0.98	12.99	-	-	-	RIDIS(p)PSTLR
IPI00413672	BCLAF1	R.RIDIS#PSTLR.K	0.571429	3	N	H	0.99	0.99	0	2.7118	13519438	7638607	1.77	0.99	HN3_1E2_MSA	4570	2	0.98	7.54	-	-	-	RIDIS(p)PSTLR
IPI00413672	BCLAF1	R.RIDIS#PSTLR.K	0.429185	4	N	H	1	0.99	0	2.6356	22790159	9731521	2.34	0.99	HN4_1E2_MSA	4143	2	0.98	6.4	-	-	-	RIDIS(p)PSTLR
IPI00413672	BCLAF1	R.RIDIS#PSTLR.K	0.442478	4	N	H	0.99	0.99	0	2.7802	18046202	7704716	2.34	0.98	HN4_1E1_MSA	5971	2	0.98	6.94	-	-	-	RIDIS(p)PSTLR
IPI00413672	BCLAF1	R.R@IDIS#PSTLR@.K	0.49	5	N	L	0.99	0.99	0	2.5947	2093807	4269378	0.49	0.99	LN5_7E1_MSA	2623	2	0.98	8.5	-	-	-	R()IDIS(p)PSTLR()
IPI00413672	BCLAF1	R.RIDIS#PSTLR.K	0.49	5	N	L	0.99	0.99	0	2.6563	2093807	4269378	0.49	0.99	LN5_7E1_MSA	2617	2	0.98	15.57	-	-	-	RIDIS(p)PSTLR
IPI00006099	BMS1	K.LGPQNFIDETS#DIENLLK^.E	0.48	4	N	L	0.95	0.89	0	3.3808	721661	1437743	0.5	0.98	LN4_1E1_LTQ	11756	2	0.98	8.95	-	-	-	LGPQNFIDETS(p)DIENLLK()
IPI00020899	BMX	C.VKVS#DFGM*T#RY#VLDDQYVSS#VGTKFPVK.W	4.34783	4	N	H	0.15	0.02	0.0482362	3.1592	10994494	2408759	4.56	0.17	HN4_1E1_MSA	10471	3	0.98	3.42	9.51	9.43	0.17	VKVS(p)DFGM()T(p)RY(p)VLDDQYVSS(p)VGTKFPVK
IPI00797574	BOD1L	K.DK^DVTLS#PVK^.A	1.17647	2	N	H	0.99	0.99	0	2.7113	3702544	4296466	0.86	1	HN2_1E1_LTQ	5151	2	0.98	18.88	-	-	-	DK()DVTLS(p)PVK()
IPI00797574	BOD1L	K.DKDVTLS#PVK.A	1.45	2	N	L	0.99	0.98	0	2.6407	1952022	1361506	1.43	1	LN2_1E1_MSA	4450	2	0.98	14.5	-	-	-	DKDVTLS(p)PVK
IPI00797574	BOD1L	K.DKDVTLS#PVK.A	0.252525	4	N	H	0.84	0.71	7.34968e-14	2.7885	1963156	417194	4.71	0.92	HN4_1E1_MSA	3000	2	0.98	25.22	-	-	-	DKDVTLS(p)PVK
IPI00797574	BOD1L	K.DK^DVTLS#PVK^.A	0.24	4	N	L	0.98	0.96	2.32947e-12	2.818	80130	338749	0.24	1	LN4_1E1_MSA	4091	2	0.98	17.48	-	-	-	DK()DVTLS(p)PVK()
IPI00797574	BOD1L	K.DK^DVTLS#PVK^.A	0.25	4	N	L	0.95	0.9	2.22045e-16	2.6172	159554	612413	0.26	0.97	LN4_1E2_MSA	2883	2	0.98	20.76	-	-	-	DK()DVTLS(p)PVK()
IPI00797574	BOD1L	K.DK^DVTLS#PVK^.A	0.46	5	N	L	0.95	0.9	1.11022e-16	2.5087	129681	264823	0.49	0.99	LN5_7E1_MSA	2019	2	0.98	22.37	-	-	-	DK()DVTLS(p)PVK()
IPI00797574	BOD1L	R.RLS#ESLHVVDENKNESK.L	0.740741	0	N	H	0.9	0.8	1.11022e-14	3.3428	563443	424887	1.33	0.97	HN0_1E2_MSA	3829	3	0.98	0.33	-	-	-	RLS(p)ESLHVVDENKNESK
IPI00028955	BOP1	R.IGDEYAEDS#S#DEEDIR.N	1.53	3	N	L	0.97	0.95	0	3.4181	1087528	733417	1.48	0.97	LN3_1E1_MSA	6015	2	0.98	61.11	49.82	-	-	IGDEYAEDS(p)S(p)DEEDIR
IPI00028955	BOP1	R.IGDEYAEDS#S#DEEDIR@.N	1.53	3	N	L	0.97	0.95	0	3.353	1087528	733417	1.48	0.97	LN3_1E1_MSA	6016	2	0.98	71.66	58.1	-	-	IGDEYAEDS(p)S(p)DEEDIR()
IPI00376404	BPTF	K.KGDIDNVKS#PEETEK.D	1.1236	5	N	H	0.45	0.21	0.00230217	2.8023	411522	274947	1.5	0.98	HN5_9E1_MSA	2217	2	0.98	25.09	-	-	-	KGDIDNVKS(p)PEETEK
IPI00785110	BPTF	R.ESHT#PVSIQEEIVGDFK^.S	0.85	2	N	L	0.85	0.72	5.7887e-13	2.8447	1053812	1197332	0.88	0.9	LN2_1E1_MSA	9589	2	0.98	11.82	-	-	-	ESHT(p)PVSIQEEIVGDFK()
IPI00785110	BPTF	R.ESHT#PVSIQEEIVGDFK.S	0.483092	4	N	H	0.7	0.48	8.2548e-07	2.9185	1685553	609620	2.76	0.97	HN4_1E2_MSA	6901	2	0.98	15.74	-	-	-	ESHT(p)PVSIQEEIVGDFK
IPI00410716	BRD3	R.SES#PPPLSDPK^.Q	0.51	3	N	L	0.88	0.77	0	2.5783	5397959	11555646	0.47	0.98	LN3_1E1_LTQ	5074	2	0.98	18.27	-	-	-	SES(p)PPPLSDPK()
IPI00410716	BRD3	R.SES#PPPLSDPK^.Q	0.35	5	N	L	0.91	0.83	0	2.8404	2288232	6348660	0.36	0.96	LN5_1E1_MSA	2900	2	0.98	12.65	-	-	-	SES(p)PPPLSDPK()
IPI00828194	BRD8	K.AT#PPPS#PLLSELLK.K	0.729927	2	N	H	0.97	0.94	0	2.5283	3403096	2553691	1.33	0.98	HN2_1E1_MSA	10679	2	0.98	43.75	16.65	-	-	AT(p)PPPS(p)PLLSELLK
IPI00828194	BRD8	K.AT#PPPS#PLLSELLK.K	0.60241	3	N	H	0.97	0.94	0	2.5743	4340674	2557461	1.7	0.99	HN3_1E1_MSA	11461	2	0.98	56.85	28.75	-	-	AT(p)PPPS(p)PLLSELLK
IPI00828194	BRD8	K.AT#PPPS#PLLSELLK^.K	0.60241	3	N	H	0.97	0.94	0	2.5778	4340674	2557461	1.7	0.99	HN3_1E1_MSA	11473	2	0.98	62.59	26.6	-	-	AT(p)PPPS(p)PLLSELLK()
IPI00828194	BRD8	K.AT#PPPS#PLLSELLK.K	0.21692	4	N	H	0.96	0.91	0	2.6165	8929668	2062917	4.33	0.99	HN4_1E1_LTQ	12880	2	0.98	50.9	23.41	-	-	AT(p)PPPS(p)PLLSELLK
IPI00148057	BRD8	K.AT#PPPS#PLLSELLK^.K	0.29	4	N	L	0.98	0.95	0	2.686	690704	2433306	0.28	0.99	LN4_1E1_MSA	9894	2	0.98	62.76	42.24	-	-	AT(p)PPPS(p)PLLSELLK()
IPI00759680	BRD9	R.LSVGEQPDVTHDPYEFLQS#PEPAASAK.T	1.17647	2	N	H	0.88	0.77	3.9968e-15	4.009	2612555	3198530	0.82	0.92	HN2_1E1_LTQ	10261	3	0.98	17.7	-	-	-	LSVGEQPDVTHDPYEFLQS(p)PEPAASAK
IPI00759680	BRD9	R.LSVGEQPDVTHDPYEFLQS#PEPAASAK.T	1.21951	2	N	H	0.92	0.84	0	4.1093	2174406	2663871	0.82	0.94	HN2_1E1_MSA	8965	3	0.98	30.68	-	-	-	LSVGEQPDVTHDPYEFLQS(p)PEPAASAK
IPI00759680	BRD9	R.LSVGEQPDVTHDPYEFLQS#PEPAASAK.T	0.862069	3	N	H	0.87	0.75	5.10703e-14	4.147	3050820	2612089	1.17	0.95	HN3_1E1_LTQ	11266	3	0.98	17.66	-	-	-	LSVGEQPDVTHDPYEFLQS(p)PEPAASAK
IPI00759680	BRD9	R.LSVGEQPDVTHDPYEFLQS#PEPAASAK^.T	0.793651	3	N	H	0.89	0.79	1.92517e-11	4.6931	2055096	1646448	1.25	0.97	HN3_1E1_MSA	9224	3	0.98	23.72	-	-	-	LSVGEQPDVTHDPYEFLQS(p)PEPAASAK()
IPI00759680	BRD9	R.LSVGEQPDVTHDPYEFLQS#PEPAASAK.T	0.401606	4	N	H	0.93	0.87	0	5.2344	5934038	2426659	2.45	0.98	HN4_1E1_LTQ	10569	3	0.98	10.72	-	-	-	LSVGEQPDVTHDPYEFLQS(p)PEPAASAK
IPI00549384	BRD9	R.LSVGEQPDVTHDPYEFLQS#PEPAASAK.T	0.4329	4	N	H	0.91	0.83	0	5.2412	5219528	2193779	2.38	0.96	HN4_1E1_MSA	8386	3	0.98	28.88	-	-	-	LSVGEQPDVTHDPYEFLQS(p)PEPAASAK
IPI00514526	BRWD1	K.IIPELVGS#PTQSTSSR@.T	0.08	4	N	L	0.14	0.02	0.206801	2.7271	61571	257625	0.24	0.74	LN4_1E1_MSA	6534	2	0.98	4.06	-	-	-	IIPELVGS(p)PTQSTSSR()
IPI00929107	BSCL2	R.EEDEPEER@S#GDETPGSEVPGDK^.A	1	2	N	L	0.89	0.79	1.26177e-08	3.3652	529864	834060	0.64	0.85	LN2_1E1_MSA	4533	3	0.98	7.15	-	-	-	EEDEPEER()S(p)GDETPGSEVPGDK()
IPI00929107	BSCL2	R.S#GDETPGSEVPGDK^.A	0.70922	0	N	H	1	0.99	0	2.8473	7312642	5948115	1.23	1	HN0_1E1_MSA	3815	2	0.98	20.12	-	-	-	S(p)GDETPGSEVPGDK()
IPI00929107	BSCL2	R.S#GDETPGSEVPGDK^.A	0.735294	0	N	H	1	0.99	0	3.2169	6852187	5436551	1.26	0.99	HN0_1E1_LTQ	4030	2	0.98	32.43	-	-	-	S(p)GDETPGSEVPGDK()
IPI00929107	BSCL2	R.S#GDETPGSEVPGDK.A	1.0101	2	N	H	1	1	0	2.9169	27071119	27188195	1	0.99	HN2_1E1_LTQ	4599	2	0.98	32.35	-	-	-	S(p)GDETPGSEVPGDK
IPI00929107	BSCL2	R.S#GDETPGSEVPGDK.A	1.02041	2	N	H	1	1	0	3.015	7688684	7758870	0.99	0.98	HN2_1E1_MSA	4345	2	0.98	31.61	-	-	-	S(p)GDETPGSEVPGDK
IPI00929107	BSCL2	R.S#GDETPGSEVPGDK^.A	1.0101	2	N	H	1	1	0	3.3215	27071119	27188195	1	0.99	HN2_1E1_LTQ	4600	2	0.98	28.17	-	-	-	S(p)GDETPGSEVPGDK()
IPI00929107	BSCL2	R.S#GDETPGSEVPGDK^.A	1.02041	2	N	H	1	1	0	3.0298	7688684	7758870	0.99	0.98	HN2_1E1_MSA	4346	2	0.98	38.75	-	-	-	S(p)GDETPGSEVPGDK()
IPI00929107	BSCL2	R.S#GDETPGSEVPGDK.A	1.07	2	N	L	1	1	0	3.0298	18187268	17418068	1.04	0.99	LN2_1E1_LTQ	4258	2	0.98	29.91	-	-	-	S(p)GDETPGSEVPGDK
IPI00929107	BSCL2	R.S#GDETPGSEVPGDK.A	1.08	2	N	L	1	1	0	2.8135	13139394	12603280	1.04	1	LN2_1E1_MSA	4069	2	0.98	26.32	-	-	-	S(p)GDETPGSEVPGDK
IPI00929107	BSCL2	R.S#GDETPGSEVPGDK.A	3.22	2	N	L	0.93	0.87	3.04645e-13	2.5284	1250245	398165	3.14	1	LN2_1E6_MSA	2201	2	0.98	15.39	-	-	-	S(p)GDETPGSEVPGDK
IPI00929107	BSCL2	R.S#GDETPGSEVPGDK.A	3.42	2	N	L	0.93	0.86	1.11022e-16	2.5508	1142989	368836	3.1	0.98	LN2_1E6_LTQ	2105	2	0.98	22.72	-	-	-	S(p)GDETPGSEVPGDK
IPI00929107	BSCL2	R.S#GDETPGSEVPGDK^.A	1.07	2	N	L	1	1	0	3.1916	18187268	17418068	1.04	0.99	LN2_1E1_LTQ	4196	2	0.98	25.54	-	-	-	S(p)GDETPGSEVPGDK()
IPI00929107	BSCL2	R.S#GDETPGSEVPGDK^.A	1.08	2	N	L	1	1	0	3.0908	13139394	12603280	1.04	1	LN2_1E1_MSA	4071	2	0.98	22.59	-	-	-	S(p)GDETPGSEVPGDK()
IPI00929107	BSCL2	R.S#GDETPGSEVPGDK^.A	3.22	2	N	L	0.93	0.87	3.04645e-13	2.8927	1250245	398165	3.14	1	LN2_1E6_MSA	2174	2	0.98	20.85	-	-	-	S(p)GDETPGSEVPGDK()
IPI00929107	BSCL2	R.S#GDETPGSEVPGDK.A	0.714286	3	N	H	0.92	0.85	4.39226e-12	2.7294	15392937	11091983	1.39	1	HN3_1E1_MSA	4253	2	0.98	32.25	-	-	-	S(p)GDETPGSEVPGDK
IPI00929107	BSCL2	R.S#GDETPGSEVPGDK.A	0.75188	3	N	H	0.93	0.87	0	3.1414	31057014	21770852	1.43	1	HN3_1E1_LTQ	5071	2	0.98	19.53	-	-	-	S(p)GDETPGSEVPGDK
IPI00929107	BSCL2	R.S#GDETPGSEVPGDK^.A	0.714286	3	N	H	0.92	0.85	4.39226e-12	2.8247	15392937	11091983	1.39	1	HN3_1E1_MSA	4208	2	0.98	26.88	-	-	-	S(p)GDETPGSEVPGDK()
IPI00929107	BSCL2	R.S#GDETPGSEVPGDK^.A	0.75188	3	N	H	0.93	0.87	0	2.553	31057014	21770852	1.43	1	HN3_1E1_LTQ	5015	2	0.98	7.43	-	-	-	S(p)GDETPGSEVPGDK()
IPI00929107	BSCL2	R.S#GDETPGSEVPGDK^.A	1.1236	3	N	H	0.84	0.7	3.20297e-09	2.728	195764	196260	1	0.91	HN3_1E6_MSA	1829	2	0.98	14.64	-	-	-	S(p)GDETPGSEVPGDK()
IPI00929107	BSCL2	R.S#GDETPGSEVPGDK.A	0.63	3	N	L	0.99	0.99	0	2.6603	8974056	16207929	0.55	0.93	LN3_1E1_LTQ	4627	2	0.98	20.29	-	-	-	S(p)GDETPGSEVPGDK
IPI00929107	BSCL2	R.S#GDETPGSEVPGDK.A	1.24	3	N	L	0.96	0.92	0	2.575	321772	264641	1.22	0.99	LN3_1E6_MSA	1951	2	0.98	20.77	-	-	-	S(p)GDETPGSEVPGDK
IPI00929107	BSCL2	R.S#GDETPGSEVPGDK^.A	0.62	3	N	L	1	0.99	0	2.8895	6354449	11328429	0.56	0.95	LN3_1E1_MSA	4200	2	0.98	15.99	-	-	-	S(p)GDETPGSEVPGDK()
IPI00929107	BSCL2	R.S#GDETPGSEVPGDK^.A	0.63	3	N	L	0.99	0.99	0	3.0089	8974056	16207929	0.55	0.93	LN3_1E1_LTQ	4615	2	0.98	26.95	-	-	-	S(p)GDETPGSEVPGDK()
IPI00929107	BSCL2	R.S#GDETPGSEVPGDK.A	0.320513	4	N	H	1	0.99	0	2.9625	15466067	5052274	3.06	0.99	HN4_1E1_MSA	1424	2	0.98	31.18	-	-	-	S(p)GDETPGSEVPGDK
IPI00929107	BSCL2	R.S#GDETPGSEVPGDK.A	0.33557	4	N	H	1	1	0	2.9802	49772255	16032203	3.1	0.91	HN4_1E1_LTQ	4899	2	0.98	28.24	-	-	-	S(p)GDETPGSEVPGDK
IPI00929107	BSCL2	R.S#GDETPGSEVPGDK.A	0.39	4	N	L	1	0.99	0	2.5082	3252723	8267872	0.39	0.99	LN4_1E1_MSA	3696	2	0.98	24.26	-	-	-	S(p)GDETPGSEVPGDK
IPI00929107	BSCL2	R.S#GDETPGSEVPGDK^.A	0.39	4	N	L	0.99	0.99	0	3.2226	4497007	11808687	0.38	0.99	LN4_1E1_LTQ	4248	2	0.98	33.9	-	-	-	S(p)GDETPGSEVPGDK()
IPI00929107	BSCL2	R.S#GDETPGSEVPGDK^.A	0.39	4	N	L	1	0.99	0	2.9886	3252723	8267872	0.39	0.99	LN4_1E1_MSA	3634	2	0.98	24.21	-	-	-	S(p)GDETPGSEVPGDK()
IPI00929107	BSCL2	R.S#GDETPGSEVPGDK.A	0.296736	5	N	H	1	1	0	3.1308	48226151	14301199	3.37	0.99	HN5_1E1_LTQ	2566	2	0.98	22.11	-	-	-	S(p)GDETPGSEVPGDK
IPI00929107	BSCL2	R.S#GDETPGSEVPGDK.A	0.301205	5	N	H	1	1	0	2.722	35120567	10426679	3.37	0.99	HN5_1E1_MSA	2415	2	0.98	25.93	-	-	-	S(p)GDETPGSEVPGDK
IPI00929107	BSCL2	R.S#GDETPGSEVPGDK^.A	0.293255	5	N	H	0.94	0.89	1.00919e-13	2.8991	852608	254791	3.35	0.98	HN5_2E1_MSA	1487	2	0.98	16.25	-	-	-	S(p)GDETPGSEVPGDK()
IPI00929107	BSCL2	R.S#GDETPGSEVPGDK^.A	0.296736	5	N	H	1	1	0	3.0129	48226151	14301199	3.37	0.99	HN5_1E1_LTQ	2607	2	0.98	18.03	-	-	-	S(p)GDETPGSEVPGDK()
IPI00929107	BSCL2	R.S#GDETPGSEVPGDK^.A	0.301205	5	N	H	1	1	0	2.9651	35120567	10426679	3.37	0.99	HN5_1E1_MSA	2409	2	0.98	29.59	-	-	-	S(p)GDETPGSEVPGDK()
IPI00929107	BSCL2	R.S#GDETPGSEVPGDK^.A	0.32	5	N	L	0.97	0.93	0	3.0655	351830	1155608	0.3	0.97	LN5_1E2_MSA	1803	2	0.98	23.04	-	-	-	S(p)GDETPGSEVPGDK()
IPI00929107	BSCL2	R.S#GDETPGSEVPGDK^.A	0.35	5	N	L	0.96	0.93	0	2.8785	410477	1211344	0.34	0.97	LN5_1E2_LTQ	1820	2	0.98	35.66	-	-	-	S(p)GDETPGSEVPGDK()
IPI00929107	BSCL2	R.S#GDETPGSEVPGDK^.A	0.36	5	N	L	1	1	0	2.9821	8994281	25186228	0.36	0.97	LN5_1E1_MSA	2486	2	0.98	20.57	-	-	-	S(p)GDETPGSEVPGDK()
IPI00929107	BSCL2	R.S#GDETPGSEVPGDK^.A	0.36	5	N	L	0.98	0.96	0	3.2189	573091	1669955	0.34	0.97	LN5_2E1_MSA	1632	2	0.98	22.99	-	-	-	S(p)GDETPGSEVPGDK()
IPI00929107	BSCL2	R.S#GDETPGSEVPGDK^.A	0.37	5	N	L	1	1	0	2.9653	16251325	44419927	0.37	0.99	LN5_1E1_LTQ	2674	2	0.98	24.5	-	-	-	S(p)GDETPGSEVPGDK()
IPI00013743	BUD13	K.YEYDPDIS#PPR.K	1.33333	4	N	H	0.65	0.42	1.42189e-07	2.9298	2797540	2459951	1.14	0.82	HN4_1E1_MSA	6366	2	0.98	37.86	-	-	-	YEYDPDIS(p)PPR
IPI00893291	BUD13	K.YEYDPDIS#PPR.K	1.44928	4	N	H	0.64	0.41	3.37089e-08	2.5415	3927275	3146816	1.25	0.93	HN4_1E1_LTQ	8217	2	0.98	22.24	-	-	-	YEYDPDIS(p)PPR
IPI00893291	BUD13	R.ARHDS#PDLAPNVTYSLPR.T	0.456621	5	N	H	0.71	0.5	0.000685504	3.6026	71077	16061	4.43	0.96	HN5_9E1_MSA	3789	3	0.98	53.71	-	-	-	ARHDS(p)PDLAPNVTYSLPR
IPI00387050	BUD13	R.HDS#PDPS#PPR@.R	0.26	4	N	L	0.75	0.56	1.96625e-06	2.5189	151481	479753	0.32	0.92	LN4_1E1_MSA	2914	2	0.98	0	-	-	-	HDS(p)PDPS(p)PPR()
IPI00013743	BUD13	R.HDT#PDPS#PLR.G	0.254453	4	N	H	0.9	0.8	1.0103e-13	2.5373	608363	181600	3.35	0.92	HN4_1E1_MSA	1458	2	0.98	0	-	-	-	HDT(p)PDPS(p)PLR
IPI00013743	BUD13	R.VHNNS#PDTSR.R	1.02041	2	N	H	0.93	0.87	1.14795e-08	2.5478	98004	92958	1.05	0.99	HN2_1E1_MSA	196	2	0.98	24.1	-	-	-	VHNNS(p)PDTSR
IPI00166933	C10orf12	-.MQS#S#ALVES#LITVKMAAENS#EEGNTCIIP.Q	20	3	N	H	0.06	0	0.298327	3.2813	1805342	10092460	0.18	0.03	HN3_1E1_MSA	11901	3	0.98	17.71	19.67	23.32	-1.46	MQS(p)S(p)ALVES(p)LITVKMAAENS(p)EEGNTC()IIP
IPI00166933	C10orf12	R.EDNPEEPSKEITSHEEGGGDVS#PR.K	0.9	3	N	L	0.98	0.96	1.26837e-11	3.4187	466981	466060	1	0.93	LN3_1E1_MSA	5289	3	0.98	21.96	-	-	-	EDNPEEPSKEITSHEEGGGDVS(p)PR
IPI00166933	C10orf12	R.EDNPEEPSKEITSHEEGGGDVS#PR.K	0.434783	4	N	H	0.96	0.91	7.36041e-08	3.4641	1298502	481269	2.7	0.97	HN4_1E1_MSA	4879	3	0.98	28.83	-	-	-	EDNPEEPSKEITSHEEGGGDVS(p)PR
IPI00106955	C11orf84	R.AES#PSPAPPPGLR.G	0.625	5	N	H	0.8	0.64	9.14475e-08	2.682	208168	79922	2.6	0.95	HN5_3E1_MSA	2522	2	0.98	26.17	-	-	-	AES(p)PSPAPPPGLR
IPI00550986	C12orf11	R.GKEELAEAEIIKDSPDS#PEPPNK.K	1.35135	3	N	H	0.76	0.58	6.76858e-07	3.7477	998995	1444448	0.69	0.83	HN3_1E1_LTQ	8461	3	0.98	-0.22	-	-	-	GKEELAEAEIIKDSPDS(p)PEPPNK
IPI00550986	C12orf11	R.GKEELAEAEIIKDSPDS#PEPPNK.K	0.510204	4	N	H	0.77	0.59	6.54311e-08	3.9789	1744454	1043505	1.67	0.97	HN4_1E1_LTQ	8017	3	0.98	18.57	-	-	-	GKEELAEAEIIKDSPDS(p)PEPPNK
IPI00885072	C12orf56	R.PLPS#PS#R@R@SSQSAPTTGK^AVS#EP.S	0.00870286	2	N	L	0.1	0.01	0.250127	3.5357	10371	1191677	0.01	0.97	LN2_1E5_LTQ	3062	4	0.98	1.4	1.74	5.95	-	PLPS(p)PS(p)R()R()SSQSAPTTGK()AVS(p)EP
IPI00009922	C14orf156	K.LPQTS#DDEKKDF.-	0.8	3	N	H	0.99	0.97	0	2.5184	3890352	3132081	1.24	0.92	HN3_1E1_LTQ	6019	2	0.98	3.08	-	-	-	LPQTS(p)DDEKKDF
IPI00878852	C14orf43	R.R@AS#QEANLLTLAQK^.A	0.943396	2	N	H	0.94	0.89	0	2.6295	1612158	1356334	1.19	0.98	HN2_1E1_LTQ	8780	2	0.98	20.25	-	-	-	R()AS(p)QEANLLTLAQK()
IPI00878852	C14orf43	R.RAS#QEANLLTLAQK.A	0.900901	2	N	H	0.94	0.89	0	3.1525	1251058	1068807	1.17	0.96	HN2_1E1_MSA	7686	2	0.98	37.83	-	-	-	RAS(p)QEANLLTLAQK
IPI00878852	C14orf43	R.RAS#QEANLLTLAQK.A	0.943396	2	N	H	0.94	0.89	0	2.6795	1612158	1356334	1.19	0.98	HN2_1E1_LTQ	8799	2	0.98	56.15	-	-	-	RAS(p)QEANLLTLAQK
IPI00878852	C14orf43	R.RAS#QEANLLTLAQK.A	0.833333	3	N	H	0.9	0.81	0	3.4179	1232339	855573	1.44	0.94	HN3_1E1_MSA	7762	2	0.98	34.47	-	-	-	RAS(p)QEANLLTLAQK
IPI00878852	C14orf43	R.RAS#QEANLLTLAQK.A	0.380228	4	N	H	0.92	0.84	9.99201e-16	2.8658	1673653	569674	2.94	0.97	HN4_1E1_MSA	6965	2	0.98	48.75	-	-	-	RAS(p)QEANLLTLAQK
IPI00878852	C14orf43	R.RAS#QEANLLTLAQK.A	0.404858	4	N	H	0.86	0.74	0	3.0272	3047185	993598	3.07	0.96	HN4_1E1_LTQ	9064	2	0.98	53.3	-	-	-	RAS(p)QEANLLTLAQK
IPI00878852	C14orf43	R.RAS#QEANLLTLAQK.A	0.425532	4	N	H	0.81	0.66	2.96344e-10	3.6836	674390	230679	2.92	0.94	HN4_1E2_MSA	4973	2	0.98	32.05	-	-	-	RAS(p)QEANLLTLAQK
IPI00878852	C14orf43	R.RAS#QEANLLTLAQK.A	0.3663	5	N	H	0.95	0.9	0	3.536	896192	277589	3.23	0.96	HN5_6E1_LTQ_2	3245	2	0.98	30.77	-	-	-	RAS(p)QEANLLTLAQK
IPI00878852	C14orf43	R.RAS#QEANLLTLAQK.A	0.3861	5	N	H	0.9	0.81	5.9508e-14	2.6759	202853	60249	3.37	0.96	HN5_6E1_MSA	2356	2	0.98	57.65	-	-	-	RAS(p)QEANLLTLAQK
IPI00854844	C15orf52	E.QGRLGSAPAAS#PALASPEGPK.G	49.3751	5	N	L	-1	0	1	2.7176	424428	8596	49.38	0.97	LN5_2E1_MSA	2079	2	0.98	5.18	-	-	-	QGRLGSAPAAS(p)PALASPEGPK
IPI00001600	C16orf53	R.DLFSLDSEDPSPAS#PPLR.S	0.869565	0	N	H	0.95	0.9	0	3.4587	2624432	2395791	1.1	0.98	HN0_1E1_LTQ	9268	2	0.98	49.48	-	-	-	DLFSLDSEDPSPAS(p)PPLR
IPI00001600	C16orf53	R.DLFSLDSEDPSPAS#PPLR.S	0.877193	0	N	H	0.96	0.92	0	3.4047	2461048	1963616	1.25	0.96	HN0_1E1_MSA	7578	2	0.98	33.41	-	-	-	DLFSLDSEDPSPAS(p)PPLR
IPI00001600	C16orf53	R.DLFSLDSEDPSPAS#PPLR.S	0.877193	2	N	H	0.96	0.93	0	3.9888	6608168	6335872	1.04	0.98	HN2_1E1_MSA	9638	2	0.98	55.84	-	-	-	DLFSLDSEDPSPAS(p)PPLR
IPI00001600	C16orf53	R.DLFSLDSEDPSPAS#PPLR.S	0.892857	2	N	H	0.97	0.93	0	4.4358	7088681	6774596	1.05	0.98	HN2_1E1_LTQ	11038	2	0.98	52.38	-	-	-	DLFSLDSEDPSPAS(p)PPLR
IPI00001600	C16orf53	R.DLFSLDSEDPSPAS#PPLR@.S	0.877193	2	N	H	0.96	0.93	0	3.63	6608168	6335872	1.04	0.98	HN2_1E1_MSA	9636	2	0.98	38.69	-	-	-	DLFSLDSEDPSPAS(p)PPLR()
IPI00001600	C16orf53	R.DLFSLDSEDPSPAS#PPLR@.S	0.892857	2	N	H	0.97	0.93	0	3.4717	7088681	6774596	1.05	0.98	HN2_1E1_LTQ	11030	2	0.98	46.23	-	-	-	DLFSLDSEDPSPAS(p)PPLR()
IPI00001600	C16orf53	R.DLFSLDSEDPSPAS#PPLR.S	1.02	2	N	L	0.98	0.96	0	4.1271	6558125	6738176	0.97	0.97	LN2_1E1_LTQ	10502	2	0.98	54.25	-	-	-	DLFSLDSEDPSPAS(p)PPLR
IPI00001600	C16orf53	R.DLFSLDSEDPSPAS#PPLR.S	1.06	2	N	L	0.98	0.95	0	4.7567	6227495	6425032	0.97	0.97	LN2_1E1_MSA	9561	2	0.98	53.85	-	-	-	DLFSLDSEDPSPAS(p)PPLR
IPI00001600	C16orf53	R.DLFSLDSEDPSPAS#PPLR@.S	1.02	2	N	L	0.98	0.96	0	3.8863	6558125	6738176	0.97	0.97	LN2_1E1_LTQ	10528	2	0.98	36.33	-	-	-	DLFSLDSEDPSPAS(p)PPLR()
IPI00001600	C16orf53	R.DLFSLDSEDPSPAS#PPLR@.S	1.06	2	N	L	0.98	0.95	0	3.9124	6227495	6425032	0.97	0.97	LN2_1E1_MSA	9540	2	0.98	54.25	-	-	-	DLFSLDSEDPSPAS(p)PPLR()
IPI00001600	C16orf53	R.DLFSLDSEDPSPAS#PPLR.S	0.537634	3	N	H	0.95	0.91	0	3.4829	5327387	3104135	1.72	0.98	HN3_1E1_MSA	10057	2	0.98	49.48	-	-	-	DLFSLDSEDPSPAS(p)PPLR
IPI00001600	C16orf53	R.DLFSLDSEDPSPAS#PPLR.S	0.546448	3	N	H	0.92	0.84	0	4.5155	6222583	3372556	1.85	0.98	HN3_1E1_LTQ	12232	2	0.98	49.39	-	-	-	DLFSLDSEDPSPAS(p)PPLR
IPI00001600	C16orf53	R.DLFSLDSEDPSPAS#PPLR@.S	0.537634	3	N	H	0.95	0.91	0	4.4776	5327387	3104135	1.72	0.98	HN3_1E1_MSA	10041	2	0.98	49.39	-	-	-	DLFSLDSEDPSPAS(p)PPLR()
IPI00001600	C16orf53	R.DLFSLDSEDPSPAS#PPLR@.S	0.546448	3	N	H	0.92	0.84	0	3.3029	6222583	3372556	1.85	0.98	HN3_1E1_LTQ	12180	2	0.98	20.39	-	-	-	DLFSLDSEDPSPAS(p)PPLR()
IPI00001600	C16orf53	R.DLFSLDSEDPSPAS#PPLR.S	0.53	3	N	L	0.96	0.92	0	4.186	2909174	5305790	0.55	0.98	LN3_1E1_MSA	9579	2	0.98	68.62	-	-	-	DLFSLDSEDPSPAS(p)PPLR
IPI00001600	C16orf53	R.DLFSLDSEDPSPAS#PPLR.S	0.55	3	N	L	0.95	0.91	0	3.8776	3099198	5566479	0.56	0.97	LN3_1E1_LTQ	11098	2	0.98	49.44	-	-	-	DLFSLDSEDPSPAS(p)PPLR
IPI00001600	C16orf53	R.DLFSLDSEDPSPAS#PPLR@.S	0.53	3	N	L	0.96	0.92	0	4.1619	2909174	5305790	0.55	0.98	LN3_1E1_MSA	9619	2	0.98	50.17	-	-	-	DLFSLDSEDPSPAS(p)PPLR()
IPI00001600	C16orf53	R.DLFSLDSEDPSPAS#PPLR@.S	0.55	3	N	L	0.95	0.91	0	2.9703	3099198	5566479	0.56	0.97	LN3_1E1_LTQ	11091	2	0.98	40.6	-	-	-	DLFSLDSEDPSPAS(p)PPLR()
IPI00001600	C16orf53	R.DLFSLDSEDPSPAS#PPLR.S	0.261097	4	N	H	0.89	0.8	0	4.3953	13335748	4079706	3.27	0.98	HN4_1E1_LTQ	11419	2	0.98	52.1	-	-	-	DLFSLDSEDPSPAS(p)PPLR
IPI00001600	C16orf53	R.DLFSLDSEDPSPAS#PPLR.S	0.27027	4	N	H	0.91	0.82	0	4.7052	10046330	3341494	3.01	0.98	HN4_1E1_MSA	9246	2	0.98	54.15	-	-	-	DLFSLDSEDPSPAS(p)PPLR
IPI00001600	C16orf53	R.DLFSLDSEDPSPAS#PPLR.S	0.27	4	N	L	0.96	0.92	0	3.6072	781425	3100869	0.25	0.98	LN4_1E1_LTQ	10171	2	0.98	48.2	-	-	-	DLFSLDSEDPSPAS(p)PPLR
IPI00001600	C16orf53	R.DLFSLDSEDPSPAS#PPLR.S	0.27	4	N	L	0.95	0.9	0	3.8773	704231	2641113	0.27	0.94	LN4_1E1_MSA	8795	2	0.98	40.07	-	-	-	DLFSLDSEDPSPAS(p)PPLR
IPI00001600	C16orf53	R.DLFSLDSEDPSPAS#PPLR.S	0.353357	5	N	H	0.94	0.88	0	4.5098	3403236	1082101	3.15	0.97	HN5_1E1_MSA	7178	2	0.98	52.03	-	-	-	DLFSLDSEDPSPAS(p)PPLR
IPI00001600	C16orf53	R.DLFSLDSEDPSPAS#PPLR.S	0.387597	5	N	H	0.98	0.96	0	3.0381	2403391	818301	2.94	0.59	HN5_1E1_LTQ	7655	2	0.98	36.78	-	-	-	DLFSLDSEDPSPAS(p)PPLR
IPI00001600	C16orf53	R.DLFSLDSEDPSPAS#PPLR@.S	0.35	5	N	L	0.91	0.84	0	3.0542	414564	1233292	0.34	0.97	LN5_1E1_LTQ	7845	2	0.98	46.16	-	-	-	DLFSLDSEDPSPAS(p)PPLR()
IPI00790228	C17orf49	K.VYEDSGIPLPAES#PK.K	0.591716	4	N	H	0.93	0.87	0	3.1129	4008096	3046190	1.32	0.98	HN4_1E1_LTQ	8848	2	0.98	56.87	-	-	-	VYEDSGIPLPAES(p)PK
IPI00791641	C17orf49	K.VYEDSGIPLPAES#PK.K	0.884956	5	N	H	0.91	0.82	0	2.5577	1801632	1609265	1.12	0.93	HN5_1E1_LTQ	5944	2	0.98	80.79	-	-	-	VYEDSGIPLPAES(p)PK
IPI00791641	C17orf49	K.VYEDSGIPLPAES#PK^.K	0.884956	5	N	H	0.91	0.82	0	2.7512	1801632	1609265	1.12	0.93	HN5_1E1_LTQ	5973	2	0.98	57.63	-	-	-	VYEDSGIPLPAES(p)PK()
IPI00791641	C17orf49	K.VYEDSGIPLPAES#PK^.K	0.909091	5	N	H	0.95	0.91	0	2.5876	1711520	1521969	1.12	0.97	HN5_1E1_MSA	5475	2	0.98	75.55	-	-	-	VYEDSGIPLPAES(p)PK()
IPI00790228	C17orf49	K.VYEDSGIPLPAES#PK.K	1.04	5	N	L	0.97	0.95	0	3.4366	2237073	2221272	1.01	0.97	LN5_1E1_LTQ	5993	2	0.98	73.57	-	-	-	VYEDSGIPLPAES(p)PK
IPI00782974	C17orf85	K.AEAPAGPALGLPS#PEAESGVDR.G	0.775194	0	N	H	0.77	0.6	5.6366e-13	3.26	2247219	2923214	0.77	0.86	HN0_1E1_LTQ	7978	2	0.98	50.22	-	-	-	AEAPAGPALGLPS(p)PEAESGVDR
IPI00782974	C17orf85	K.AEAPAGPALGLPS#PEAESGVDR@.G	0.775194	0	N	H	0.77	0.6	5.6366e-13	3.3003	2247219	2923214	0.77	0.86	HN0_1E1_LTQ	7997	2	0.98	48.23	-	-	-	AEAPAGPALGLPS(p)PEAESGVDR()
IPI00782974	C17orf85	K.AEAPAGPALGLPS#PEAESGVDR.G	0.546448	2	N	H	0.85	0.72	8.7963e-13	3.6721	5344704	6448280	0.83	0.87	HN2_1E1_LTQ	9202	2	0.98	40.81	-	-	-	AEAPAGPALGLPS(p)PEAESGVDR
IPI00782974	C17orf85	K.AEAPAGPALGLPS#PEAESGVDR.G	0.925926	2	N	H	0.83	0.69	3.33067e-16	3.618	4415506	7273789	0.61	0.93	HN2_1E1_MSA	8022	2	0.98	31.59	-	-	-	AEAPAGPALGLPS(p)PEAESGVDR
IPI00782974	C17orf85	K.AEAPAGPALGLPS#PEAESGVDR@.G	0.546448	2	N	H	0.85	0.72	8.7963e-13	3.4101	5344704	6448280	0.83	0.87	HN2_1E1_LTQ	9205	2	0.98	32.27	-	-	-	AEAPAGPALGLPS(p)PEAESGVDR()
IPI00782974	C17orf85	K.AEAPAGPALGLPS#PEAESGVDR@.G	0.925926	2	N	H	0.83	0.69	3.33067e-16	4.8468	4415506	7273789	0.61	0.93	HN2_1E1_MSA	8014	2	0.98	44.72	-	-	-	AEAPAGPALGLPS(p)PEAESGVDR()
IPI00782974	C17orf85	K.AEAPAGPALGLPS#PEAESGVDR.G	0.99	2	N	L	0.84	0.7	1.19629e-11	3.1874	3673102	6769310	0.54	0.85	LN2_1E1_LTQ	8707	2	0.98	19.25	-	-	-	AEAPAGPALGLPS(p)PEAESGVDR
IPI00782974	C17orf85	K.AEAPAGPALGLPS#PEAESGVDR@.G	0.94	2	N	L	0.86	0.73	1.99262e-11	3.9317	3273986	6398576	0.51	0.88	LN2_1E1_MSA	7770	2	0.98	36.48	-	-	-	AEAPAGPALGLPS(p)PEAESGVDR()
IPI00782974	C17orf85	K.AEAPAGPALGLPS#PEAESGVDR@.G	0.99	2	N	L	0.84	0.7	1.19629e-11	3.9163	3673102	6769310	0.54	0.85	LN2_1E1_LTQ	8637	2	0.98	26.89	-	-	-	AEAPAGPALGLPS(p)PEAESGVDR()
IPI00782974	C17orf85	K.AEAPAGPALGLPS#PEAESGVDR.G	0.456621	3	N	H	0.77	0.59	2.72651e-07	3.7584	5187977	5020150	1.03	0.98	HN3_1E1_MSA	8182	2	0.98	59.75	-	-	-	AEAPAGPALGLPS(p)PEAESGVDR
IPI00782974	C17orf85	K.AEAPAGPALGLPS#PEAESGVDR.G	0.806452	3	N	H	0.52	0.27	0.000865109	3.5182	5409766	5533233	0.98	0.59	HN3_1E1_LTQ	10051	2	0.98	19.17	-	-	-	AEAPAGPALGLPS(p)PEAESGVDR
IPI00782974	C17orf85	K.AEAPAGPALGLPS#PEAESGVDR@.G	0.456621	3	N	H	0.77	0.59	2.72651e-07	4.4574	5187977	5020150	1.03	0.98	HN3_1E1_MSA	8193	2	0.98	38.28	-	-	-	AEAPAGPALGLPS(p)PEAESGVDR()
IPI00782974	C17orf85	K.AEAPAGPALGLPS#PEAESGVDR@.G	0.806452	3	N	H	0.52	0.27	0.000865109	4.6428	5409766	5533233	0.98	0.59	HN3_1E1_LTQ	10037	2	0.98	23.16	-	-	-	AEAPAGPALGLPS(p)PEAESGVDR()
IPI00782974	C17orf85	K.AEAPAGPALGLPS#PEAESGVDR@.G	0.59	3	N	L	0.91	0.83	1.07692e-14	4.6445	2756556	5907209	0.47	0.96	LN3_1E1_LTQ	9145	2	0.98	44.1	-	-	-	AEAPAGPALGLPS(p)PEAESGVDR()
IPI00782974	C17orf85	K.AEAPAGPALGLPS#PEAESGVDR@.G	0.63	3	N	L	0.94	0.88	0	5.0832	2235891	5173066	0.43	0.87	LN3_1E1_MSA	7859	2	0.98	38.54	-	-	-	AEAPAGPALGLPS(p)PEAESGVDR()
IPI00782974	C17orf85	K.AEAPAGPALGLPS#PEAESGVDR.G	0.462963	4	N	H	0.47	0.22	0.00187168	4.9018	8640953	5435338	1.59	0.99	HN4_1E1_MSA	7386	2	0.98	42.8	-	-	-	AEAPAGPALGLPS(p)PEAESGVDR
IPI00782974	C17orf85	K.AEAPAGPALGLPS#PEAESGVDR.G	1.81818	4	N	H	0.08	0.01	0.316911	4.6221	11143625	7002896	1.59	0.99	HN4_1E1_LTQ	9549	2	0.98	52.79	-	-	-	AEAPAGPALGLPS(p)PEAESGVDR
IPI00782974	C17orf85	K.AEAPAGPALGLPS#PEAESGVDR@.G	0.33	4	N	L	0.95	0.91	0	2.7515	714323	2743667	0.26	0.98	LN4_1E1_LTQ	8462	2	0.98	15.06	-	-	-	AEAPAGPALGLPS(p)PEAESGVDR()
IPI00782974	C17orf85	K.AEAPAGPALGLPS#PEAESGVDR@.G	0.33	4	N	L	0.92	0.84	0	2.6454	580181	2477827	0.23	0.95	LN4_1E1_MSA	7190	2	0.98	10.85	-	-	-	AEAPAGPALGLPS(p)PEAESGVDR()
IPI00782974	C17orf85	K.AEAPAGPALGLPS#PEAESGVDR.G	0.273973	5	N	H	0.94	0.89	0	4.4506	6551299	2809468	2.33	0.99	HN5_1E1_MSA	5908	2	0.98	52.28	-	-	-	AEAPAGPALGLPS(p)PEAESGVDR
IPI00782974	C17orf85	K.AEAPAGPALGLPS#PEAESGVDR.G	0.337838	5	N	H	0.88	0.78	8.88178e-16	4.2039	6922852	2856399	2.42	0.94	HN5_1E1_LTQ	6390	2	0.98	21.76	-	-	-	AEAPAGPALGLPS(p)PEAESGVDR
IPI00782974	C17orf85	K.AEAPAGPALGLPS#PEAESGVDR.G	0.502513	5	N	H	0.66	0.43	3.45848e-05	4.0876	325567	105003	3.1	0.94	HN5_2E1_MSA	2708	2	0.98	27.42	-	-	-	AEAPAGPALGLPS(p)PEAESGVDR
IPI00782974	C17orf85	K.AEAPAGPALGLPS#PEAESGVDR@.G	0.273973	5	N	H	0.94	0.89	0	2.9746	6551299	2809468	2.33	0.99	HN5_1E1_MSA	5923	2	0.98	54.77	-	-	-	AEAPAGPALGLPS(p)PEAESGVDR()
IPI00782974	C17orf85	K.AEAPAGPALGLPS#PEAESGVDR@.G	0.337838	5	N	H	0.88	0.78	8.88178e-16	2.9024	6922852	2856399	2.42	0.94	HN5_1E1_LTQ	6384	2	0.98	27.05	-	-	-	AEAPAGPALGLPS(p)PEAESGVDR()
IPI00782974	C17orf85	K.AEAPAGPALGLPS#PEAESGVDR.G	0.34	5	N	L	0.97	0.93	0	3.7255	1750095	5303093	0.33	0.99	LN5_1E1_MSA	5860	2	0.98	29.92	-	-	-	AEAPAGPALGLPS(p)PEAESGVDR
IPI00782974	C17orf85	K.AEAPAGPALGLPS#PEAESGVDR.G	0.35	5	N	L	0.97	0.94	0	2.6328	2308000	6731349	0.34	0.97	LN5_1E1_LTQ	6460	2	0.98	26.12	-	-	-	AEAPAGPALGLPS(p)PEAESGVDR
IPI00782974	C17orf85	K.AEAPAGPALGLPS#PEAESGVDR@.G	0.34	5	N	L	0.97	0.93	0	3.1006	1750095	5303093	0.33	0.99	LN5_1E1_MSA	5858	2	0.98	34.85	-	-	-	AEAPAGPALGLPS(p)PEAESGVDR()
IPI00782974	C17orf85	K.AEAPAGPALGLPS#PEAESGVDR@.G	0.35	5	N	L	0.97	0.94	0	4.0014	2308000	6731349	0.34	0.97	LN5_1E1_LTQ	6466	2	0.98	53.84	-	-	-	AEAPAGPALGLPS(p)PEAESGVDR()
IPI00844507	C1orf174	F.LDDDS#NQPM*PVSR.F	14.2857	4	N	H	0.04	0	0.354478	2.8784	694800	150821	4.61	0.54	HN4_1E1_LTQ	3984	2	0.98	55.63	-	-	-	LDDDS(p)NQPM()PVSR
IPI00844507	C1orf174	F.LDDDS#NQPM*PVSR@.F	0.13	4	N	L	0.56	0.31	0.00489268	2.5572	30760	212015	0.15	0.96	LN4_1E1_LTQ	4039	2	0.98	54.9	-	-	-	LDDDS(p)NQPM()PVSR()
IPI00844507	C1orf174	F.LDDDS#NQPMPVSR.F	0.806452	2	N	H	0.97	0.94	0	3.1322	512102	469608	1.09	0.98	HN2_1E1_LTQ	5476	2	0.98	74.73	-	-	-	LDDDS(p)NQPMPVSR
IPI00844507	C1orf174	F.LDDDS#NQPMPVSR.F	0.89	2	N	L	0.92	0.85	5.85693e-09	2.6152	269693	289614	0.93	0.9	LN2_1E1_LTQ	5017	2	0.98	83.62	-	-	-	LDDDS(p)NQPMPVSR
IPI00844507	C1orf174	F.LDDDS#NQPMPVSR@.F	0.5	3	N	L	0.72	0.53	0.000132776	2.5653	170954	291522	0.59	0.89	LN3_1E1_LTQ	5422	2	0.98	57.29	-	-	-	LDDDS(p)NQPMPVSR()
IPI00844507	C1orf174	F.LDDDS#NQPMPVSR.F	0.2849	4	N	H	0.9	0.82	7.19373e-06	2.8929	858101	287833	2.98	0.98	HN4_1E1_LTQ	5919	2	0.98	79.88	-	-	-	LDDDS(p)NQPMPVSR
IPI00019451	C20orf20	K.VLTANSNPSS#PSAAK.R	0.505051	5	N	H	0.77	0.6	1.11097e-05	3.0952	169446	70769	2.39	0.97	HN5_3E1_MSA	1810	2	0.98	7.35	-	-	-	VLTANSNPSS(p)PSAAK
IPI00921245	C2orf7	S.T#WLHLS#PDAISK^FQVAK^.F	0.09	2	N	L	0.38	0.14	0.0557827	2.729	50009	516491	0.1	0.86	LN2_1E1_MSA	9032	2	0.98	8.76	5.31	-	-	T(p)WLHLS(p)PDAISK()FQVAK()
IPI00790098	C3orf63	K.GGNLPPVS#PNDSGAK^.I	1.02041	2	N	H	0.75	0.57	1.85536e-07	2.513	926100	927038	1	0.74	HN2_1E1_LTQ	5275	2	0.98	9.87	-	-	-	GGNLPPVS(p)PNDSGAK()
IPI00385928	C4orf14	A.DS#LAFDM*ENDPVMGTHKST#KQVELT#AQDVK.D	0.715189	4	N	H	-1	0	1	3.4892	5333114	3814183	1.4	0	HN4_1E1_MSA	7970	3	0.98	19.59	8.47	13.88	-	DS(p)LAFDM()ENDPVMGTHKST(p)KQVELT(p)AQDVK
IPI00043294	C7orf26	R.LPHNNLLQLVISGPVQQS#PH.A	1.03093	2	N	H	0.99	0.99	0	3.7177	1185391	1248181	0.95	0.91	HN2_1E1_LTQ	11786	3	0.98	50.57	-	-	-	LPHNNLLQLVISGPVQQS(p)PH
IPI00043294	C7orf26	R.LPHNNLLQLVISGPVQQS#PH.A	1.0101	4	N	H	1	1	0	3.4452	1968613	1997413	0.99	0.95	HN4_1E1_MSA	10079	3	0.98	47.79	-	-	-	LPHNNLLQLVISGPVQQS(p)PH
IPI00043294	C7orf26	R.LPHNNLLQLVISGPVQQS#PH.A	1.02041	4	N	H	1	0.99	0	3.8479	1360059	1388243	0.98	0.87	HN4_1E1_LTQ	12333	3	0.98	49.37	-	-	-	LPHNNLLQLVISGPVQQS(p)PH
IPI00456599	C7orf70	G.PLGT#CLAQVQQAGGGDSDK^LSCSLK^.K	0.00732077	3	N	L	0.79	0.63	1.09435e-12	3.1162	530198	72423786	0.01	0.96	LN3_1E3_LTQ	5146	3	0.98	50.46	-	-	-	PLGT(p)C()LAQVQQAGGGDSDK()LSC()SLK()
IPI00030968	C9orf142	R.LAAAEETAVS#PR@.K	1.04167	2	N	H	0.97	0.94	1.97398e-13	3.0997	2896425	2946175	0.98	0.91	HN2_1E1_LTQ	5063	2	0.98	69.03	-	-	-	LAAAEETAVS(p)PR()
IPI00030968	C9orf142	R.LAAAEETAVS#PR@.K	1.5625	3	N	H	0.73	0.54	0.00023935	2.5758	1126109	1438928	0.78	0.75	HN3_1E1_MSA	4585	2	0.98	22.78	-	-	-	LAAAEETAVS(p)PR()
IPI00030968	C9orf142	R.LAAAEETAVS#PR@.K	0.63	3	N	L	0.83	0.69	1.00015e-07	2.791	2671377	4889999	0.55	0.98	LN3_1E1_LTQ	4989	2	0.98	20.44	-	-	-	LAAAEETAVS(p)PR()
IPI00030968	C9orf142	R.LAAAEETAVS#PR@.K	0.63	3	N	L	0.85	0.72	1.47242e-06	3.0096	1544803	2948753	0.52	0.98	LN3_1E1_MSA	4474	2	0.98	31.92	-	-	-	LAAAEETAVS(p)PR()
IPI00030968	C9orf142	R.LAAAEETAVS#PR.K	0.625	4	N	H	0.78	0.61	8.51563e-12	2.6698	348106	160390	2.17	0.87	HN4_1E2_MSA	1484	2	0.98	31.73	-	-	-	LAAAEETAVS(p)PR
IPI00030968	C9orf142	R.LAAAEETAVS#PR@.K	0.45	4	N	L	0.86	0.74	1.07816e-11	3.0469	185490	466570	0.4	0.95	LN4_1E2_LTQ	3220	2	0.98	33.77	-	-	-	LAAAEETAVS(p)PR()
IPI00030968	C9orf142	R.LAAAEETAVS#PR@.K	0.53	4	N	L	0.98	0.96	0	2.8099	531925	949650	0.56	0.96	LN4_1E1_LTQ	4631	2	0.98	48.2	-	-	-	LAAAEETAVS(p)PR()
IPI00030968	C9orf142	R.LAAAEETAVS#PR@.K	0.54	4	N	L	0.93	0.87	5.55112e-16	2.7409	147170	359402	0.41	0.96	LN4_1E2_MSA	2977	2	0.98	35.99	-	-	-	LAAAEETAVS(p)PR()
IPI00030968	C9orf142	R.LAAAEETAVS#PR.K	3.7382	5	N	H	0.01	0	0.478468	3.0463	651254	2434520	0.27	0.73	HN5_3E1_LTQ	2374	2	0.98	52.69	-	-	-	LAAAEETAVS(p)PR
IPI00030968	C9orf142	R.LAAAEETAVS#PR@.K	0.8	5	N	H	0.92	0.85	6.01181e-11	3.2248	973500	881968	1.1	0.98	HN5_1E1_MSA	2757	2	0.98	24.9	-	-	-	LAAAEETAVS(p)PR()
IPI00030968	C9orf142	R.LAAAEETAVS#PR.K	0.4	5	N	L	0.59	0.34	0.000101635	3.3392	986511	2151136	0.46	0.94	LN5_3E1_LTQ	2323	2	0.98	54.25	-	-	-	LAAAEETAVS(p)PR
IPI00030968	C9orf142	R.LAAAEETAVS#PR.K	0.65	5	N	L	0.84	0.7	2.97056e-10	2.5603	299921	470259	0.64	0.91	LN5_1E2_LTQ	2043	2	0.98	49.48	-	-	-	LAAAEETAVS(p)PR
IPI00030968	C9orf142	R.LAAAEETAVS#PR.K	0.93	5	N	L	0.91	0.84	0	2.883	418016	538984	0.78	0.93	LN5_2E1_LTQ	1950	2	0.98	50.57	-	-	-	LAAAEETAVS(p)PR
IPI00030968	C9orf142	R.LAAAEETAVS#PR@.K	0.4	5	N	L	0.59	0.34	0.000101635	3.243	986511	2151136	0.46	0.94	LN5_3E1_LTQ	2302	2	0.98	52.59	-	-	-	LAAAEETAVS(p)PR()
IPI00030968	C9orf142	R.LAAAEETAVS#PR@.K	0.65	5	N	L	0.84	0.7	2.97056e-10	2.6609	299921	470259	0.64	0.91	LN5_1E2_LTQ	2033	2	0.98	43.91	-	-	-	LAAAEETAVS(p)PR()
IPI00030968	C9orf142	R.LAAAEETAVS#PR@.K	0.76	5	N	L	0.92	0.84	0	3.1451	2434951	3683519	0.66	0.97	LN5_1E1_LTQ	2996	2	0.98	50.07	-	-	-	LAAAEETAVS(p)PR()
IPI00030968	C9orf142	R.LAAAEETAVS#PR@.K	0.9	5	N	L	0.99	0.99	0	2.7976	1547458	1856714	0.83	0.96	LN5_1E1_MSA	2790	2	0.98	28.04	-	-	-	LAAAEETAVS(p)PR()
IPI00030968	C9orf142	R.LAAAEETAVS#PR@.K	0.93	5	N	L	0.91	0.84	0	3.0627	418016	538984	0.78	0.93	LN5_2E1_LTQ	1956	2	0.98	68.94	-	-	-	LAAAEETAVS(p)PR()
IPI00030968	C9orf142	R.LAAAEETAVS#PR@.K	0.101626	5	N	L	0.01	0	0.479361	2.8987	736327	7245440	0.1	0.97	LN5_3E1_MSA	2048	2	0.98	28.96	-	-	-	LAAAEETAVS(p)PR()
IPI00550191	C9orf78	R.VGDT#EKPEPERSPPNR.K	0.338983	4	N	H	0.95	0.9	0	3.18	2991268	996434	3	0.94	HN4_1E1_MSA	936	3	0.98	14.1	-	-	-	VGDTEKPEPERS(p)PPNR
IPI00550191	C9orf78	R.VGDT#EKPEPERSPPNR.K	0.398406	4	N	H	0.97	0.94	0	3.0133	11520920	4245738	2.71	0.9	HN4_1E1_LTQ	4797	3	0.98	0.09	-	-	-	VGDTEKPEPERS(p)PPNR
IPI00550191	C9orf78	R.VGDT#EKPEPERSPPNR.K	0.53	4	N	L	0.99	0.98	0	3.1147	239440	481635	0.5	0.89	LN4_1E2_MSA	2313	3	0.98	-6.41	-	-	-	VGDTEKPEPERS(p)PPNR
IPI00550191	C9orf78	R.VGDTEKPEPERS#PPNR.K	0.81	3	N	L	0.93	0.86	9.01601e-12	3.6342	2169381	1842352	1.18	0.79	LN3_1E1_MSA	3974	3	0.98	15.72	-	-	-	VGDTEKPEPERS(p)PPNR
IPI00550191	C9orf78	R.VGDTEKPEPERS#PPNR.K	0.462963	5	N	H	0.98	0.96	0	2.9531	1100317	505662	2.18	0.95	HN5_8E1_MSA	1744	2	0.98	38.82	-	-	-	VGDTEKPEPERS(p)PPNR
IPI00954120	C9orf82	K.SVNEILGLAESS#PNEPK^.A	0.26	2	N	L	0.33	0.11	0.0670485	2.5456	315079	454276	0.69	0.77	LN2_1E1_MSA	8718	2	0.98	17.27	-	-	-	SVNEILGLAESS(p)PNEPK()
IPI00954120	C9orf82	K.SVNEILGLAESS#PNEPK^.A	0.29	4	N	L	0.41	0.17	0.0139265	3.436	122308	323146	0.38	0.77	LN4_1E1_MSA	8080	2	0.98	12.82	-	-	-	SVNEILGLAESS(p)PNEPK()
IPI00945776	CACNA1D	K.DHASM*PT#S#ETES#VNT#ENVSGEGEN.R	0.88	4	N	L	0.99	0.98	0	3.1953	338086	385241	0.88	0.85	LN4_1E1_MSA	6133	3	0.98	0.7	0.77	0.38	0.6	DHASM()PT(p)S(p)ETES(p)VNT(p)ENVSGEGEN
IPI00876923	CAMK2D	K.KPDGVKES#TESSNTTIEDEDVK.A	0.621118	5	N	H	0.75	0.56	2.08518e-07	3.3485	553839	218893	2.53	0.92	HN5_9E1_LTQ	3170	3	0.98	4.06	-	-	-	KPDGVKES(p)TESSNTTIEDEDVK
IPI00941747	CANX	K.QKS#DAEEDGGTVSQEEEDRKPK.A	0.323625	4	N	H	0.96	0.92	3.08504e-11	3.1673	2688107	720277	3.73	0.98	HN4_1E1_LTQ	5498	3	0.98	15.05	-	-	-	QKS(p)DAEEDGGTVSQEEEDRKPK
IPI00020984	CANX	K.QKS#DAEEDGGTVSQEEEDRKPK.A	0.408163	5	N	H	0.96	0.92	0	3.2522	1905875	806315	2.36	0.88	HN5_9E1_MSA	2291	3	0.98	15.1	-	-	-	QKS(p)DAEEDGGTVSQEEEDRKPK
IPI00941747	CANX	K.QKS#DAEEDGGTVSQEEEDRKPK.A	0.409836	5	N	H	0.95	0.9	1.40863e-08	3.2751	1406875	568233	2.48	0.95	HN5_9E1_MSA	2317	3	0.98	9.52	-	-	-	QKS(p)DAEEDGGTVSQEEEDRKPK
IPI00941747	CANX	K.QKS#DAEEDGGTVSQEEEDRKPK.A	0.434783	5	N	H	0.95	0.89	9.65894e-15	3.0426	1386808	578850	2.4	0.97	HN5_9E1_LTQ	2676	3	0.98	11.96	-	-	-	QKS(p)DAEEDGGTVSQEEEDRKPK
IPI00941747	CANX	K.S#DAEEDGGTVSQEEEDR.K	0.746269	0	N	H	0.94	0.88	2.24282e-08	3.2739	229831	164388	1.4	0.95	HN0_1E1_LTQ	4280	2	0.98	35.09	-	-	-	S(p)DAEEDGGTVSQEEEDR
IPI00941747	CANX	K.S#DAEEDGGTVSQEEEDR.K	0.909091	0	N	H	0.93	0.86	5.13094e-07	4.3035	172747	140941	1.23	0.97	HN0_1E1_MSA	4056	2	0.98	31.76	-	-	-	S(p)DAEEDGGTVSQEEEDR
IPI00941747	CANX	K.S#DAEEDGGTVSQEEEDR@.K	0.746269	0	N	H	0.94	0.88	2.24282e-08	3.1464	229831	164388	1.4	0.95	HN0_1E1_LTQ	4268	2	0.98	36.01	-	-	-	S(p)DAEEDGGTVSQEEEDR()
IPI00941747	CANX	K.S#DAEEDGGTVSQEEEDR@.K	0.909091	0	N	H	0.93	0.86	5.13094e-07	4.6381	172747	140941	1.23	0.97	HN0_1E1_MSA	4058	2	0.98	34.56	-	-	-	S(p)DAEEDGGTVSQEEEDR()
IPI00941747	CANX	K.S#DAEEDGGTVSQEEEDR.K	0.952381	3	N	H	0.91	0.83	6.66134e-16	4.1239	1249365	1158337	1.08	0.53	HN3_1E1_LTQ	5343	2	0.98	41.77	-	-	-	S(p)DAEEDGGTVSQEEEDR
IPI00941747	CANX	K.S#DAEEDGGTVSQEEEDR@.K	1.07	3	N	L	0.79	0.62	0.000193169	3.7252	224385	209179	1.07	0.9	LN3_1E1_LTQ	4886	2	0.98	31.73	-	-	-	S(p)DAEEDGGTVSQEEEDR()
IPI00941747	CANX	K.S#DAEEDGGTVSQEEEDR@.K	0.58	4	N	L	0.9	0.81	1.22125e-15	3.3632	263182	456943	0.58	0.82	LN4_1E1_LTQ	4517	2	0.98	24.29	-	-	-	S(p)DAEEDGGTVSQEEEDR()
IPI00941747	CANX	K.S#DAEEDGGTVSQEEEDR.K	0.555556	5	N	H	0.85	0.73	2.83373e-09	3.5685	692714	298641	2.32	0.93	HN5_1E1_LTQ	2802	2	0.98	45.4	-	-	-	S(p)DAEEDGGTVSQEEEDR
IPI00941747	CANX	K.S#DAEEDGGTVSQEEEDR@.K	0.46	5	N	L	0.92	0.85	1.262e-11	4.6705	361464	808484	0.45	0.93	LN5_1E1_LTQ	2827	2	0.98	62.06	-	-	-	S(p)DAEEDGGTVSQEEEDR()
IPI00941747	CANX	K.S#DAEEDGGTVSQEEEDR@.K	0.47	5	N	L	0.92	0.85	2.3701e-10	4.5787	192649	462664	0.42	0.93	LN5_1E1_MSA	2642	2	0.98	75.47	-	-	-	S(p)DAEEDGGTVSQEEEDR()
IPI00941747	CANX	K.SDAEEDGGTVS#QEEEDR.K	0.952381	3	N	H	0.91	0.83	6.66134e-16	3.483	1249365	1158337	1.08	0.53	HN3_1E1_LTQ	5228	2	0.98	9.15	-	-	-	SDAEEDGGTVS(p)QEEEDR
IPI00941747	CANX	K.SDAEEDGGTVS#QEEEDR@.K	1.08	3	N	L	0.9	0.8	7.2653e-12	3.8116	450024	419529	1.07	0.75	LN3_1E1_LTQ	4789	2	0.98	15.74	-	-	-	SDAEEDGGTVS(p)QEEEDR()
IPI00941747	CANX	K.SDAEEDGGTVS#QEEEDR.K	0.5	4	N	H	0.98	0.95	1.13358e-10	2.8962	931718	458635	2.03	0.94	HN4_1E1_LTQ	5344	2	0.98	11.36	-	-	-	SDAEEDGGTVS(p)QEEEDR
IPI00941747	CANX	K.SDAEEDGGTVS#QEEEDR.K	0.505051	4	N	H	0.94	0.88	0	2.861	815738	355484	2.29	0.96	HN4_1E1_MSA	2080	2	0.98	8.49	-	-	-	SDAEEDGGTVS(p)QEEEDR
IPI00941747	CANX	K.SDAEEDGGTVS#QEEEDR@.K	0.58	4	N	L	0.9	0.81	1.22125e-15	3.6899	263182	456943	0.58	0.82	LN4_1E1_LTQ	4414	2	0.98	16.34	-	-	-	SDAEEDGGTVS(p)QEEEDR()
IPI00941747	CANX	K.SDAEEDGGTVS#QEEEDR@.K	0.59	4	N	L	0.94	0.89	3.33067e-16	3.3164	193206	336510	0.57	0.75	LN4_1E1_MSA	3873	2	0.98	15.24	-	-	-	SDAEEDGGTVS(p)QEEEDR()
IPI00941747	CANX	K.SDAEEDGGTVS#QEEEDR.K	0.367647	5	N	H	0.85	0.73	9.14605e-10	3.725	783182	239466	3.27	0.96	HN5_1E1_LTQ	2700	2	0.98	8.5	-	-	-	SDAEEDGGTVS(p)QEEEDR
IPI00941747	CANX	K.SDAEEDGGTVS#QEEEDR@.K	0.5	5	N	L	0.96	0.92	2.2946e-11	3.5624	152848	327441	0.47	0.95	LN5_1E1_MSA	2559	2	0.98	16.72	-	-	-	SDAEEDGGTVS(p)QEEEDR()
IPI00895873	CAPN14	K.VEWKGDWSDSSSKWELLS#PKE.K	0.13	4	N	L	0.06	0	0.373733	3.2568	236709	83323	2.84	0.89	LN4_1E5_MSA	4231	3	0.98	43.09	-	-	-	VEWKGDWSDSSSKWELLS(p)PKE
IPI00170766	CASC5	R.ILAMTPESIYSNPSIQGCK^TVFY#S#S#.C	8.96412	2	N	H	0.02	0	0.422612	3.4814	3082213	27629332	0.11	0.91	HN2_1E1_LTQ	7687	3	0.98	0	0	1.63	-	ILAMTPESIYS(p)NPSIQGC()K()TVFYS(p)S(p)
IPI00010320	CBX1	H.KADS#DSEDKGEESKPK.G	0.862069	3	N	H	0.93	0.87	0	2.7532	612121	473711	1.29	0.96	HN3_1E1_MSA	3251	2	0.98	25.48	-	-	-	KADS(p)DSEDKGEESKPK
IPI00878669	CBX1	R.KADS#DSEDKGEESKPK.K	0.346021	5	N	H	0.95	0.9	0	2.6274	1194568	371930	3.21	0.97	HN5_9E1_MSA	478	2	0.98	11.05	-	-	-	KADS(p)DSEDKGEESKPK
IPI00297579	CBX3	K.RKS#LSDSESDDSK.S	5.29	3	N	L	0.84	0.71	6.72418e-07	3.1242	614279	102293	6.01	0.98	LN3_1E1_LTQ	4124	3	0.98	7.76	-	-	-	RKS(p)LSDSESDDSK
IPI00297579	CBX3	K.SLS#DSESDDSK.S	1.03093	0	N	H	0.78	0.6	0	2.6996	3224816	2561381	1.26	0.82	HN0_1E1_MSA	1694	2	0.98	20	-	-	-	SLS(p)DSESDDSK
IPI00297579	CBX3	K.SLS#DSESDDSK^.S	0.980392	0	N	H	0.81	0.65	0	3.0177	3393676	2703978	1.26	0.88	HN0_1E1_MSA	1678	2	0.98	20	-	-	-	SLS(p)DSESDDSK()
IPI00297579	CBX3	K.SLS#DSESDDSK.S	1.1236	2	N	H	0.73	0.54	1.53943e-07	2.6265	1503083	1034567	1.45	0.62	HN2_1E1_MSA	1212	2	0.98	10.83	-	-	-	SLS(p)DSESDDSK
IPI00297579	CBX3	K.SLS#DSESDDSK^.S	1.1236	2	N	H	0.73	0.54	1.53943e-07	2.8388	1503083	1034567	1.45	0.62	HN2_1E1_MSA	1197	2	0.98	15.17	-	-	-	SLS(p)DSESDDSK()
IPI00297579	CBX3	K.SLS#DSESDDSK.S	0.970874	3	N	H	0.92	0.84	0	2.5406	9317853	10322298	0.9	0.76	HN3_1E1_LTQ	1276	2	0.98	12.3	-	-	-	SLS(p)DSESDDSK
IPI00297579	CBX3	K.SLS#DSESDDSK.S	1.17647	3	N	H	0.94	0.89	0	2.718	4100237	4445554	0.92	0.92	HN3_1E1_MSA	1022	2	0.98	20	-	-	-	SLS(p)DSESDDSK
IPI00297579	CBX3	K.SLS#DSESDDSK^.S	1.11111	3	N	H	0.94	0.89	0	2.6833	4485083	5045021	0.89	0.98	HN3_1E1_MSA	989	2	0.98	5.88	-	-	-	SLS(p)DSESDDSK()
IPI00297579	CBX3	K.SLS#DSESDDSK.S	0.74	3	N	L	0.64	0.41	2.94209e-14	2.6095	4817149	3321340	1.45	0.7	LN3_1E1_MSA	1183	2	0.98	15.17	-	-	-	SLS(p)DSESDDSK
IPI00297579	CBX3	K.SLS#DSESDDSK^.S	0.73	3	N	L	0.62	0.39	2.00617e-13	2.9923	4792282	3308991	1.45	0.7	LN3_1E1_MSA	1187	2	0.98	20	-	-	-	SLS(p)DSESDDSK()
IPI00297579	CBX3	K.SLS#DSESDDSK^.S	1.21	3	N	L	0.8	0.64	0	2.5405	4466333	3358400	1.33	0.7	LN3_1E1_LTQ	1387	2	0.98	17.54	-	-	-	SLS(p)DSESDDSK()
IPI00297579	CBX3	K.SLS#DSESDDSK.S	0.57	4	N	L	0.92	0.84	0	2.6379	2426204	4151142	0.58	0.91	LN4_1E1_MSA	968	2	0.98	7.93	-	-	-	SLS(p)DSESDDSK
IPI00297579	CBX3	K.SLS#DSESDDSK^.S	0.58	4	N	L	0.94	0.88	0	2.6708	2628427	4527183	0.58	0.92	LN4_1E1_MSA	902	2	0.98	16.21	-	-	-	SLS(p)DSESDDSK()
IPI00297579	CBX3	K.SLS#DSESDDSK.S	0.591716	5	N	H	0.99	0.98	0	3.1718	5681475	3379349	1.68	0.99	HN5_1E1_MSA	1302	2	0.98	7.46	-	-	-	SLS(p)DSESDDSK
IPI00297579	CBX3	K.SLS#DSESDDSK^.S	0.584795	5	N	H	0.99	0.98	0	2.8038	4957538	2878717	1.72	0.99	HN5_1E1_LTQ	1322	2	0.98	7.93	-	-	-	SLS(p)DSESDDSK()
IPI00297579	CBX3	K.SLS#DSESDDSK^.S	0.591716	5	N	H	0.99	0.98	0	3.1447	5681475	3379349	1.68	0.99	HN5_1E1_MSA	1311	2	0.98	15.77	-	-	-	SLS(p)DSESDDSK()
IPI00297579	CBX3	K.SLS#DSESDDSK.S	0.84	5	N	L	0.99	0.99	0	2.5901	4171043	4857775	0.86	0.98	LN5_1E1_MSA	1309	2	0.98	13.8	-	-	-	SLS(p)DSESDDSK
IPI00297579	CBX3	K.SLS#DSESDDSK^.S	0.84	5	N	L	0.99	0.99	0	2.9603	4171043	4857775	0.86	0.98	LN5_1E1_MSA	1313	2	0.98	13.4	-	-	-	SLS(p)DSESDDSK()
IPI00297579	CBX3	R.KSLS#DSESDDSK.S	0.680272	3	N	H	0.96	0.91	0	2.5674	2332829	1598156	1.46	0.97	HN3_1E1_LTQ	1576	2	0.98	4.59	-	-	-	KSLS(p)DSESDDSK
IPI00297579	CBX3	R.KSLS#DSESDDSK.S	0.322581	4	N	H	0.99	0.97	0	2.6963	1387850	484510	2.86	0.97	HN4_1E1_LTQ	727	2	0.98	12.67	-	-	-	KSLS(p)DSESDDSK
IPI00218135	CBX4	I.LLDS#DLDEPIDLR.C	1.03093	0	N	H	0.73	0.54	5.64629e-10	3.486	565368	576954	0.98	0.8	HN0_1E1_LTQ	9127	2	0.98	0	-	-	-	LLDS(p)DLDEPIDLR
IPI00218135	CBX4	I.LLDS#DLDEPIDLR.C	1.35135	2	N	H	0.93	0.87	0	3.3887	1597624	2631801	0.61	0.94	HN2_1E1_MSA	9504	2	0.98	0	-	-	-	LLDS(p)DLDEPIDLR
IPI00010872	CBX4	I.LLDS#DLDEPIDLR.C	1.36986	2	N	H	0.94	0.89	0	3.2949	2130538	3498068	0.61	0.93	HN2_1E1_LTQ	10820	2	0.98	0	-	-	-	LLDS(p)DLDEPIDLR
IPI00218135	CBX4	I.LLDS#DLDEPIDLR.C	1.36986	2	N	H	0.94	0.89	0	3.4395	2130538	3498068	0.61	0.93	HN2_1E1_LTQ	10870	2	0.98	0	-	-	-	LLDS(p)DLDEPIDLR
IPI00218135	CBX4	I.LLDS#DLDEPIDLR@.C	1.35135	2	N	H	0.93	0.87	0	3.51	1597624	2631801	0.61	0.94	HN2_1E1_MSA	9493	2	0.98	0	-	-	-	LLDS(p)DLDEPIDLR()
IPI00218135	CBX4	I.LLDS#DLDEPIDLR@.C	1.36986	2	N	H	0.94	0.89	0	3.4957	2130538	3498068	0.61	0.93	HN2_1E1_LTQ	10808	2	0.98	0	-	-	-	LLDS(p)DLDEPIDLR()
IPI00010872	CBX4	I.LLDS#DLDEPIDLR@.C	1.36986	2	N	H	0.94	0.89	0	3.4957	2130538	3498068	0.61	0.93	HN2_1E1_LTQ	10808	2	0.98	0	-	-	-	LLDS(p)DLDEPIDLR()
IPI00218135	CBX4	I.LLDS#DLDEPIDLR.C	1.74	2	N	L	0.96	0.92	0	3.4401	4163304	2952676	1.41	0.98	LN2_1E1_LTQ	10362	2	0.98	0	-	-	-	LLDS(p)DLDEPIDLR
IPI00218135	CBX4	I.LLDS#DLDEPIDLR.C	1.76	2	N	L	0.98	0.95	0	3.3273	4234953	2864330	1.48	0.98	LN2_1E1_MSA	9349	2	0.98	0	-	-	-	LLDS(p)DLDEPIDLR
IPI00010872	CBX4	I.LLDS#DLDEPIDLR.C	1.76	2	N	L	0.98	0.95	0	3.207	4234953	2864330	1.48	0.98	LN2_1E1_MSA	9398	2	0.98	0	-	-	-	LLDS(p)DLDEPIDLR
IPI00218135	CBX4	I.LLDS#DLDEPIDLR@.C	1.74	2	N	L	0.96	0.92	0	3.59	4163304	2952676	1.41	0.98	LN2_1E1_LTQ	10367	2	0.98	0	-	-	-	LLDS(p)DLDEPIDLR()
IPI00218135	CBX4	I.LLDS#DLDEPIDLR@.C	1.76	2	N	L	0.98	0.95	0	3.2186	4234953	2864330	1.48	0.98	LN2_1E1_MSA	9404	2	0.98	0	-	-	-	LLDS(p)DLDEPIDLR()
IPI00010872	CBX4	I.LLDS#DLDEPIDLR@.C	1.76	2	N	L	0.98	0.95	0	3.2186	4234953	2864330	1.48	0.98	LN2_1E1_MSA	9404	2	0.98	0	-	-	-	LLDS(p)DLDEPIDLR()
IPI00218135	CBX4	I.LLDS#DLDEPIDLR.C	0.724638	3	N	H	0.98	0.95	0	2.9412	2319250	2038655	1.14	0.96	HN3_1E1_MSA	9822	2	0.98	0	-	-	-	LLDS(p)DLDEPIDLR
IPI00218135	CBX4	I.LLDS#DLDEPIDLR.C	0.8	3	N	H	0.96	0.93	0	2.9548	3365695	2903479	1.16	0.98	HN3_1E1_LTQ	12035	2	0.98	0	-	-	-	LLDS(p)DLDEPIDLR
IPI00218135	CBX4	I.LLDS#DLDEPIDLR@.C	0.724638	3	N	H	0.98	0.95	0	3.2802	2319250	2038655	1.14	0.96	HN3_1E1_MSA	9831	2	0.98	0	-	-	-	LLDS(p)DLDEPIDLR()
IPI00218135	CBX4	I.LLDS#DLDEPIDLR@.C	0.8	3	N	H	0.96	0.93	0	3.063	3365695	2903479	1.16	0.98	HN3_1E1_LTQ	11997	2	0.98	0	-	-	-	LLDS(p)DLDEPIDLR()
IPI00218135	CBX4	I.LLDS#DLDEPIDLR.C	0.89	3	N	L	0.97	0.95	0	4.0505	4080470	4568667	0.89	0.98	LN3_1E1_LTQ	10875	2	0.98	0	-	-	-	LLDS(p)DLDEPIDLR
IPI00010872	CBX4	I.LLDS#DLDEPIDLR.C	0.89	3	N	L	0.97	0.95	0	3.7828	4080470	4568667	0.89	0.98	LN3_1E1_LTQ	10929	2	0.98	0	-	-	-	LLDS(p)DLDEPIDLR
IPI00218135	CBX4	I.LLDS#DLDEPIDLR.C	0.93	3	N	L	0.99	0.97	0	3.195	3161263	3954653	0.8	0.92	LN3_1E1_MSA	9390	2	0.98	0	-	-	-	LLDS(p)DLDEPIDLR
IPI00010872	CBX4	I.LLDS#DLDEPIDLR.C	0.93	3	N	L	0.99	0.97	0	3.1853	3161263	3954653	0.8	0.92	LN3_1E1_MSA	9438	2	0.98	0	-	-	-	LLDS(p)DLDEPIDLR
IPI00218135	CBX4	I.LLDS#DLDEPIDLR@.C	0.89	3	N	L	0.97	0.95	0	4.1333	4080470	4568667	0.89	0.98	LN3_1E1_LTQ	10881	2	0.98	0	-	-	-	LLDS(p)DLDEPIDLR()
IPI00010872	CBX4	I.LLDS#DLDEPIDLR@.C	0.89	3	N	L	0.97	0.95	0	4.1333	4080470	4568667	0.89	0.98	LN3_1E1_LTQ	10881	2	0.98	0	-	-	-	LLDS(p)DLDEPIDLR()
IPI00218135	CBX4	I.LLDS#DLDEPIDLR@.C	0.93	3	N	L	0.99	0.97	0	3.696	3161263	3954653	0.8	0.92	LN3_1E1_MSA	9434	2	0.98	0	-	-	-	LLDS(p)DLDEPIDLR()
IPI00010872	CBX4	I.LLDS#DLDEPIDLR@.C	0.93	3	N	L	0.99	0.97	0	3.696	3161263	3954653	0.8	0.92	LN3_1E1_MSA	9434	2	0.98	0	-	-	-	LLDS(p)DLDEPIDLR()
IPI00218135	CBX4	I.LLDS#DLDEPIDLR.C	0.628931	4	N	H	0.92	0.84	0	2.5762	3379627	2629155	1.29	0.97	HN4_1E1_LTQ	11223	2	0.98	0	-	-	-	LLDS(p)DLDEPIDLR
IPI00218135	CBX4	I.LLDS#DLDEPIDLR.C	0.684932	4	N	H	0.89	0.79	1.11022e-16	3.1851	2846745	2052943	1.39	0.96	HN4_1E1_MSA	9075	2	0.98	0	-	-	-	LLDS(p)DLDEPIDLR
IPI00218135	CBX4	I.LLDS#DLDEPIDLR.C	0.57	4	N	L	0.97	0.95	0	3.5804	1271980	2350967	0.54	0.97	LN4_1E1_MSA	8689	2	0.98	0	-	-	-	LLDS(p)DLDEPIDLR
IPI00218135	CBX4	I.LLDS#DLDEPIDLR.C	0.59	4	N	L	0.97	0.94	0	3.4849	1436382	2354829	0.61	0.97	LN4_1E1_LTQ	10019	2	0.98	0	-	-	-	LLDS(p)DLDEPIDLR
IPI00218135	CBX4	I.LLDS#DLDEPIDLR@.C	0.57	4	N	L	0.97	0.95	0	4.0002	1271980	2350967	0.54	0.97	LN4_1E1_MSA	8686	2	0.98	0	-	-	-	LLDS(p)DLDEPIDLR()
IPI00218135	CBX4	I.LLDS#DLDEPIDLR@.C	0.59	4	N	L	0.97	0.94	0	3.9673	1436382	2354829	0.61	0.97	LN4_1E1_LTQ	10052	2	0.98	0	-	-	-	LLDS(p)DLDEPIDLR()
IPI00218135	CBX4	I.LLDS#DLDEPIDLR.C	0.5	5	N	H	0.86	0.74	8.75567e-10	3.5435	1668971	776348	2.15	0.98	HN5_1E1_MSA	7030	2	0.98	0	-	-	-	LLDS(p)DLDEPIDLR
IPI00218135	CBX4	I.LLDS#DLDEPIDLR@.C	0.534759	5	N	H	0.79	0.62	4.9653e-09	3.4865	1809430	930070	1.95	0.96	HN5_1E1_MSA	7040	2	0.98	0	-	-	-	LLDS(p)DLDEPIDLR()
IPI00218135	CBX4	I.LLDS#DLDEPIDLR@.C	0.546448	5	N	H	0.93	0.86	1.24212e-12	3.0261	954677	514800	1.85	0.83	HN5_1E1_LTQ	7507	2	0.98	0	-	-	-	LLDS(p)DLDEPIDLR()
IPI00218135	CBX4	I.LLDS#DLDEPIDLR.C	0.34	5	N	L	0.66	0.43	0.000117845	3.0418	243521	512420	0.48	0.86	LN5_1E1_LTQ	7705	2	0.98	0	-	-	-	LLDS(p)DLDEPIDLR
IPI00218135	CBX4	I.LLDS#DLDEPIDLR@.C	0.34	5	N	L	0.66	0.43	0.000117845	3.8266	243521	512420	0.48	0.86	LN5_1E1_LTQ	7704	2	0.98	0	-	-	-	LLDS(p)DLDEPIDLR()
IPI00412260	CCDC86	R.ALVEFESNPEETR@EPGS#PPSVQR@.A	0.952381	0	N	H	0.97	0.93	0	4.0676	10967629	10456619	1.05	0.97	HN0_1E1_MSA	6402	3	0.98	15.06	-	-	-	ALVEFESNPEETR()EPGS(p)PPSVQR()
IPI00412260	CCDC86	R.ALVEFESNPEETR@EPGS#PPSVQR@.A	0.990099	0	N	H	0.98	0.96	0	4.4342	8162882	8602522	0.95	0.97	HN0_1E1_LTQ	7495	3	0.98	25.99	-	-	-	ALVEFESNPEETR()EPGS(p)PPSVQR()
IPI00012199	CCDC86	R.ALVEFESNPEETREPGS#PPSVQR.A	0.952381	0	N	H	0.97	0.93	0	4.2951	10967629	10456619	1.05	0.97	HN0_1E1_MSA	6336	3	0.98	14.44	-	-	-	ALVEFESNPEETREPGS(p)PPSVQR
IPI00412260	CCDC86	R.ALVEFESNPEETREPGS#PPSVQR.A	0.952381	0	N	H	0.97	0.93	0	4.6858	10967629	10456619	1.05	0.97	HN0_1E1_MSA	6379	3	0.98	38.14	-	-	-	ALVEFESNPEETREPGS(p)PPSVQR
IPI00412260	CCDC86	R.ALVEFESNPEETREPGS#PPSVQR.A	0.990099	0	N	H	0.98	0.96	0	3.9381	8162882	8602522	0.95	0.97	HN0_1E1_LTQ	7468	3	0.98	14.34	-	-	-	ALVEFESNPEETREPGS(p)PPSVQR
IPI00012199	CCDC86	R.ALVEFESNPEETREPGS#PPSVQR.A	0.990099	0	N	H	0.98	0.96	0	3.9301	8162882	8602522	0.95	0.97	HN0_1E1_LTQ	7523	3	0.98	13.54	-	-	-	ALVEFESNPEETREPGS(p)PPSVQR
IPI00412260	CCDC86	R.ALVEFESNPEETREPGS#PPSVQR.A	1.0989	0	N	H	0.81	0.66	6.83442e-12	3.2817	715232	755730	0.95	0.87	HN0_1E2_LTQ	5170	3	0.98	6.74	-	-	-	ALVEFESNPEETREPGS(p)PPSVQR
IPI00412260	CCDC86	R.ALVEFESNPEETREPGS#PPSVQR.A	1.16279	0	N	H	0.8	0.64	1.17982e-10	3.234	948663	972939	0.98	0.89	HN0_1E2_MSA	5474	3	0.98	5	-	-	-	ALVEFESNPEETREPGS(p)PPSVQR
IPI00412260	CCDC86	R.ALVEFESNPEETR@EPGS#PPSVQR@.A	1.02041	2	N	H	0.99	0.99	0	3.6209	21625606	22907463	0.94	0.9	HN2_1E1_LTQ	8546	3	0.98	21.8	-	-	-	ALVEFESNPEETR()EPGS(p)PPSVQR()
IPI00012199	CCDC86	R.ALVEFESNPEETR@EPGS#PPSVQR@.A	1.07527	2	N	H	0.99	0.99	0	4.1739	14719177	16340802	0.9	0.9	HN2_1E1_MSA	7370	3	0.98	17.96	-	-	-	ALVEFESNPEETR()EPGS(p)PPSVQR()
IPI00412260	CCDC86	R.ALVEFESNPEETR@EPGS#PPSVQR@.A	1.07527	2	N	H	0.99	0.99	0	4.1931	14719177	16340802	0.9	0.9	HN2_1E1_MSA	7437	3	0.98	14.71	-	-	-	ALVEFESNPEETR()EPGS(p)PPSVQR()
IPI00412260	CCDC86	R.ALVEFESNPEETREPGS#PPSVQR.A	1.02041	2	N	H	0.99	0.99	0	4.628	21625606	22907463	0.94	0.9	HN2_1E1_LTQ	8444	3	0.98	17.8	-	-	-	ALVEFESNPEETREPGS(p)PPSVQR
IPI00012199	CCDC86	R.ALVEFESNPEETREPGS#PPSVQR.A	1.02041	2	N	H	0.99	0.99	0	4.628	21625606	22907463	0.94	0.9	HN2_1E1_LTQ	8444	3	0.98	17.8	-	-	-	ALVEFESNPEETREPGS(p)PPSVQR
IPI00412260	CCDC86	R.ALVEFESNPEETREPGS#PPSVQR.A	1.07527	2	N	H	0.99	0.99	0	4.0605	14719177	16340802	0.9	0.9	HN2_1E1_MSA	7406	3	0.98	35.13	-	-	-	ALVEFESNPEETREPGS(p)PPSVQR
IPI00012199	CCDC86	R.ALVEFESNPEETREPGS#PPSVQR.A	1.07527	2	N	H	0.99	0.99	0	4.0605	14719177	16340802	0.9	0.9	HN2_1E1_MSA	7406	3	0.98	35.13	-	-	-	ALVEFESNPEETREPGS(p)PPSVQR
IPI00412260	CCDC86	R.ALVEFESNPEETR@EPGS#PPSVQR@.A	1.17	2	N	L	1	0.99	0	4.5397	14600364	13035134	1.12	0.96	LN2_1E1_LTQ	7983	3	0.98	10.93	-	-	-	ALVEFESNPEETR()EPGS(p)PPSVQR()
IPI00412260	CCDC86	R.ALVEFESNPEETR@EPGS#PPSVQR@.A	1.18	2	N	L	0.99	0.99	0	4.2182	12403229	10852211	1.14	0.96	LN2_1E1_MSA	7189	3	0.98	14.25	-	-	-	ALVEFESNPEETR()EPGS(p)PPSVQR()
IPI00012199	CCDC86	R.ALVEFESNPEETR@EPGS#PPSVQR@.A	1.18	2	N	L	0.99	0.99	0	4.2182	12403229	10852211	1.14	0.96	LN2_1E1_MSA	7189	3	0.98	14.25	-	-	-	ALVEFESNPEETR()EPGS(p)PPSVQR()
IPI00412260	CCDC86	R.ALVEFESNPEETREPGS#PPSVQR.A	1.14	2	N	L	0.81	0.65	4.59791e-11	3.7515	516895	384388	1.34	0.93	LN2_1E6_MSA	4514	3	0.98	8.16	-	-	-	ALVEFESNPEETREPGS(p)PPSVQR
IPI00412260	CCDC86	R.ALVEFESNPEETREPGS#PPSVQR.A	1.17	2	N	L	1	0.99	0	4.0838	14600364	13035134	1.12	0.96	LN2_1E1_LTQ	7948	3	0.98	27.3	-	-	-	ALVEFESNPEETREPGS(p)PPSVQR
IPI00012199	CCDC86	R.ALVEFESNPEETREPGS#PPSVQR.A	1.17	2	N	L	1	0.99	0	3.3612	14600364	13035134	1.12	0.96	LN2_1E1_LTQ	8013	3	0.98	12.19	-	-	-	ALVEFESNPEETREPGS(p)PPSVQR
IPI00012199	CCDC86	R.ALVEFESNPEETREPGS#PPSVQR.A	1.18	2	N	L	0.99	0.99	0	4.0611	12403229	10852211	1.14	0.96	LN2_1E1_MSA	7110	3	0.98	18.57	-	-	-	ALVEFESNPEETREPGS(p)PPSVQR
IPI00412260	CCDC86	R.ALVEFESNPEETREPGS#PPSVQR.A	1.18	2	N	L	0.99	0.99	0	4.814	12403229	10852211	1.14	0.96	LN2_1E1_MSA	7223	3	0.98	27.88	-	-	-	ALVEFESNPEETREPGS(p)PPSVQR
IPI00412260	CCDC86	R.ALVEFESNPEETR@EPGS#PPSVQR@.A	1.78571	3	N	H	0.99	0.99	0	3.8975	27804458	52392963	0.53	0.91	HN3_1E1_LTQ	9321	3	0.98	14.37	-	-	-	ALVEFESNPEETR()EPGS(p)PPSVQR()
IPI00012199	CCDC86	R.ALVEFESNPEETR@EPGS#PPSVQR@.A	1.78571	3	N	H	0.99	0.99	0	3.8975	27804458	52392963	0.53	0.91	HN3_1E1_LTQ	9321	3	0.98	14.37	-	-	-	ALVEFESNPEETR()EPGS(p)PPSVQR()
IPI00412260	CCDC86	R.ALVEFESNPEETR@EPGS#PPSVQR@.A	1.81818	3	N	H	1	0.99	0	4.2191	14229058	26319865	0.54	0.9	HN3_1E1_MSA	7541	3	0.98	21.81	-	-	-	ALVEFESNPEETR()EPGS(p)PPSVQR()
IPI00412260	CCDC86	R.ALVEFESNPEETR@EPGS#PPSVQR@.A	1.92308	3	N	H	0.88	0.78	1.10467e-13	3.6243	1046631	1887209	0.55	0.95	HN3_1E2_LTQ	6352	3	0.98	6.24	-	-	-	ALVEFESNPEETR()EPGS(p)PPSVQR()
IPI00412260	CCDC86	R.ALVEFESNPEETREPGS#PPSVQR.A	1.69492	3	N	H	0.91	0.83	9.99201e-16	3.0926	743583	1405338	0.53	0.91	HN3_1E2_MSA	5161	3	0.98	8.73	-	-	-	ALVEFESNPEETREPGS(p)PPSVQR
IPI00012199	CCDC86	R.ALVEFESNPEETREPGS#PPSVQR.A	1.78571	3	N	H	0.99	0.99	0	3.5807	27804458	52392963	0.53	0.91	HN3_1E1_LTQ	9149	3	0.98	18.68	-	-	-	ALVEFESNPEETREPGS(p)PPSVQR
IPI00412260	CCDC86	R.ALVEFESNPEETREPGS#PPSVQR.A	1.78571	3	N	H	0.99	0.99	0	4.5991	27804458	52392963	0.53	0.91	HN3_1E1_LTQ	9294	3	0.98	11.3	-	-	-	ALVEFESNPEETREPGS(p)PPSVQR
IPI00412260	CCDC86	R.ALVEFESNPEETREPGS#PPSVQR.A	1.81818	3	N	H	1	0.99	0	3.9081	14229058	26319865	0.54	0.9	HN3_1E1_MSA	7476	3	0.98	10.16	-	-	-	ALVEFESNPEETREPGS(p)PPSVQR
IPI00412260	CCDC86	R.ALVEFESNPEETR@EPGS#PPSVQR@.A	1.81	3	N	L	0.99	0.99	0	3.9603	38516874	21771657	1.77	0.95	LN3_1E1_LTQ	8433	3	0.98	7.76	-	-	-	ALVEFESNPEETR()EPGS(p)PPSVQR()
IPI00012199	CCDC86	R.ALVEFESNPEETR@EPGS#PPSVQR@.A	1.81	3	N	L	0.99	0.99	0	3.7623	38516874	21771657	1.77	0.95	LN3_1E1_LTQ	8497	3	0.98	17.41	-	-	-	ALVEFESNPEETR()EPGS(p)PPSVQR()
IPI00412260	CCDC86	R.ALVEFESNPEETR@EPGS#PPSVQR@.A	1.83	3	N	L	0.99	0.99	0	3.7213	22654173	12529564	1.81	0.95	LN3_1E1_MSA	7277	3	0.98	5.89	-	-	-	ALVEFESNPEETR()EPGS(p)PPSVQR()
IPI00412260	CCDC86	R.ALVEFESNPEETREPGS#PPSVQR.A	1.81	3	N	L	0.99	0.99	0	4.088	38516874	21771657	1.77	0.95	LN3_1E1_LTQ	8328	3	0.98	23.82	-	-	-	ALVEFESNPEETREPGS(p)PPSVQR
IPI00012199	CCDC86	R.ALVEFESNPEETREPGS#PPSVQR.A	1.81	3	N	L	0.99	0.99	0	4.088	38516874	21771657	1.77	0.95	LN3_1E1_LTQ	8328	3	0.98	23.82	-	-	-	ALVEFESNPEETREPGS(p)PPSVQR
IPI00412260	CCDC86	R.ALVEFESNPEETREPGS#PPSVQR.A	1.83	3	N	L	0.99	0.99	0	4.1879	22654173	12529564	1.81	0.95	LN3_1E1_MSA	7270	3	0.98	20.18	-	-	-	ALVEFESNPEETREPGS(p)PPSVQR
IPI00012199	CCDC86	R.ALVEFESNPEETREPGS#PPSVQR.A	1.83	3	N	L	0.99	0.99	0	4.1016	22654173	12529564	1.81	0.95	LN3_1E1_MSA	7325	3	0.98	11.82	-	-	-	ALVEFESNPEETREPGS(p)PPSVQR
IPI00412260	CCDC86	R.ALVEFESNPEETREPGS#PPSVQR.A	0.584795	4	N	H	0.99	0.98	0	4.0695	36262002	22425615	1.62	0.92	HN4_1E1_LTQ	8655	3	0.98	13.76	-	-	-	ALVEFESNPEETREPGS(p)PPSVQR
IPI00412260	CCDC86	R.ALVEFESNPEETREPGS#PPSVQR.A	0.609756	4	N	H	0.99	0.99	0	4.3149	30231639	20939705	1.44	0.96	HN4_1E1_MSA	6621	3	0.98	22.34	-	-	-	ALVEFESNPEETREPGS(p)PPSVQR
IPI00412260	CCDC86	R.ALVEFESNPEETREPGS#PPSVQR.A	0.854701	4	N	H	0.89	0.8	3.85247e-14	4.165	1512772	1055090	1.43	0.96	HN4_1E2_MSA	4790	3	0.98	9.13	-	-	-	ALVEFESNPEETREPGS(p)PPSVQR
IPI00412260	CCDC86	R.ALVEFESNPEETR@EPGS#PPSVQR@.A	0.57	4	N	L	0.99	0.98	0	3.9053	6789646	12324539	0.55	0.96	LN4_1E1_LTQ	7779	3	0.98	17.37	-	-	-	ALVEFESNPEETR()EPGS(p)PPSVQR()
IPI00412260	CCDC86	R.ALVEFESNPEETR@EPGS#PPSVQR@.A	0.58	4	N	L	0.99	0.98	0	4.023	4873220	8832725	0.55	0.96	LN4_1E1_MSA	6610	3	0.98	17.13	-	-	-	ALVEFESNPEETR()EPGS(p)PPSVQR()
IPI00012199	CCDC86	R.ALVEFESNPEETR@EPGS#PPSVQR@.A	0.58	4	N	L	0.99	0.98	0	3.4136	4873220	8832725	0.55	0.96	LN4_1E1_MSA	6700	3	0.98	19.21	-	-	-	ALVEFESNPEETR()EPGS(p)PPSVQR()
IPI00412260	CCDC86	R.ALVEFESNPEETREPGS#PPSVQR.A	0.57	4	N	L	0.99	0.98	0	4.1444	6789646	12324539	0.55	0.96	LN4_1E1_LTQ	7843	3	0.98	23.76	-	-	-	ALVEFESNPEETREPGS(p)PPSVQR
IPI00412260	CCDC86	R.ALVEFESNPEETREPGS#PPSVQR.A	0.58	4	N	L	0.99	0.98	0	3.7184	4873220	8832725	0.55	0.96	LN4_1E1_MSA	6639	3	0.98	18.27	-	-	-	ALVEFESNPEETREPGS(p)PPSVQR
IPI00012199	CCDC86	R.ALVEFESNPEETREPGS#PPSVQR.A	0.58	4	N	L	0.99	0.98	0	3.503	4873220	8832725	0.55	0.96	LN4_1E1_MSA	6687	3	0.98	11.95	-	-	-	ALVEFESNPEETREPGS(p)PPSVQR
IPI00412260	CCDC86	R.ALVEFESNPEETR@EPGS#PPSVQR@.A	0.943396	5	N	H	0.91	0.82	3.28556e-10	3.4295	3019279	2897817	1.04	0.94	HN5_1E1_MSA	5423	3	0.98	8.64	-	-	-	ALVEFESNPEETR()EPGS(p)PPSVQR()
IPI00012199	CCDC86	R.ALVEFESNPEETR@EPGS#PPSVQR@.A	0.943396	5	N	H	0.91	0.82	3.28556e-10	3.4295	3019279	2897817	1.04	0.94	HN5_1E1_MSA	5423	3	0.98	8.64	-	-	-	ALVEFESNPEETR()EPGS(p)PPSVQR()
IPI00412260	CCDC86	R.ALVEFESNPEETREPGS#PPSVQR.A	0.943396	5	N	H	0.91	0.82	3.28556e-10	4.1672	3019279	2897817	1.04	0.94	HN5_1E1_MSA	5396	3	0.98	45.7	-	-	-	ALVEFESNPEETREPGS(p)PPSVQR
IPI00012199	CCDC86	R.ALVEFESNPEETREPGS#PPSVQR.A	0.952381	5	N	H	0.93	0.87	2.22045e-16	3.2338	3341136	3248031	1.03	0.9	HN5_1E1_MSA	5343	3	0.98	17.32	-	-	-	ALVEFESNPEETREPGS(p)PPSVQR
IPI00412260	CCDC86	R.ALVEFESNPEETREPGS#PPSVQR.A	1.06383	5	N	H	0.94	0.88	0	4.5136	3808627	3739782	1.02	0.9	HN5_1E1_LTQ	5826	3	0.98	18.57	-	-	-	ALVEFESNPEETREPGS(p)PPSVQR
IPI00412260	CCDC86	R.ALVEFESNPEETREPGS#PPSVQR.A	1.16279	5	N	H	0.87	0.76	1.69889e-10	3.5381	641183	652349	0.98	0.9	HN5_3E1_LTQ	3960	3	0.98	12.49	-	-	-	ALVEFESNPEETREPGS(p)PPSVQR
IPI00412260	CCDC86	R.ALVEFESNPEETR@EPGS#PPSVQR@.A	0.74	5	N	L	0.9	0.82	3.96572e-13	3.3743	410825	476604	0.86	0.93	LN5_3E1_MSA	3221	3	0.98	7.03	-	-	-	ALVEFESNPEETR()EPGS(p)PPSVQR()
IPI00412260	CCDC86	R.ALVEFESNPEETREPGS#PPSVQR.A	0.74	5	N	L	0.8	0.65	1.5503e-06	3.9723	1001313	1445045	0.69	0.78	LN5_1E1_MSA	5375	3	0.98	12.44	-	-	-	ALVEFESNPEETREPGS(p)PPSVQR
IPI00012199	CCDC86	R.ALVEFESNPEETREPGS#PPSVQR.A	0.74	5	N	L	0.8	0.65	1.5503e-06	3.9723	1001313	1445045	0.69	0.78	LN5_1E1_MSA	5375	3	0.98	12.44	-	-	-	ALVEFESNPEETREPGS(p)PPSVQR
IPI00412260	CCDC86	R.ALVEFESNPEETREPGS#PPSVQR.A	0.76	5	N	L	0.87	0.75	1.85005e-09	3.0556	1467765	2025028	0.72	0.83	LN5_1E1_LTQ	5881	3	0.98	7.86	-	-	-	ALVEFESNPEETREPGS(p)PPSVQR
IPI00012199	CCDC86	R.ALVEFESNPEETREPGS#PPSVQR.A	0.76	5	N	L	0.87	0.75	1.85005e-09	3.0556	1467765	2025028	0.72	0.83	LN5_1E1_LTQ	5881	3	0.98	7.86	-	-	-	ALVEFESNPEETREPGS(p)PPSVQR
IPI00412260	CCDC86	R.ALVEFESNPEETREPGS#PPSVQR.A	0.86	5	N	L	0.84	0.71	4.28401e-08	3.6147	381827	392694	0.97	0.9	LN5_3E1_LTQ	3909	3	0.98	11.37	-	-	-	ALVEFESNPEETREPGS(p)PPSVQR
IPI00412260	CCDC86	R.LGGLR@PES#PESLTSVSR@.T	0.869565	0	N	H	0.97	0.94	0	3.3534	1672433	1557014	1.07	0.98	HN0_1E2_LTQ	5020	3	0.98	6.49	-	-	-	LGGLR()PES(p)PESLTSVSR()
IPI00412260	CCDC86	R.LGGLR@PES#PESLTSVSR@.T	0.892857	0	N	H	0.99	0.98	0	3.4591	7398808	6597472	1.12	0.98	HN0_1E1_MSA	6229	2	0.98	21.06	-	-	-	LGGLR()PES(p)PESLTSVSR()
IPI00012199	CCDC86	R.LGGLR@PES#PESLTSVSR@.T	0.892857	0	N	H	0.99	0.98	0	3.4591	7398808	6597472	1.12	0.98	HN0_1E1_MSA	6229	2	0.98	21.06	-	-	-	LGGLR()PES(p)PESLTSVSR()
IPI00412260	CCDC86	R.LGGLR@PES#PESLTSVSR@.T	0.892857	0	N	H	0.96	0.92	0	3.3257	1318036	1148425	1.15	0.98	HN0_1E2_MSA	5330	2	0.98	24.56	-	-	-	LGGLR()PES(p)PESLTSVSR()
IPI00412260	CCDC86	R.LGGLR@PES#PESLTSVSR@.T	0.925926	0	N	H	0.99	0.99	0	4.515	10970952	10101511	1.09	0.98	HN0_1E1_LTQ	7265	3	0.98	21.94	-	-	-	LGGLR()PES(p)PESLTSVSR()
IPI00412260	CCDC86	R.LGGLR@PES#PESLTSVSR@.T	0.990099	0	N	H	0.98	0.96	0	4.0625	2003840	1909386	1.05	0.99	HN0_1E2_MSA	5328	3	0.98	27.4	-	-	-	LGGLR()PES(p)PESLTSVSR()
IPI00412260	CCDC86	R.LGGLRPES#PESLTSVSR.T	0.892857	0	N	H	0.99	0.98	0	4.1805	7398808	6597472	1.12	0.98	HN0_1E1_MSA	6191	2	0.98	18.31	-	-	-	LGGLRPES(p)PESLTSVSR
IPI00012199	CCDC86	R.LGGLRPES#PESLTSVSR.T	0.892857	0	N	H	0.99	0.98	0	4.1805	7398808	6597472	1.12	0.98	HN0_1E1_MSA	6191	2	0.98	18.31	-	-	-	LGGLRPES(p)PESLTSVSR
IPI00412260	CCDC86	R.LGGLRPES#PESLTSVSR.T	0.892857	0	N	H	0.96	0.92	0	3.3485	1318036	1148425	1.15	0.98	HN0_1E2_MSA	5345	2	0.98	17.59	-	-	-	LGGLRPES(p)PESLTSVSR
IPI00412260	CCDC86	R.LGGLRPES#PESLTSVSR.T	0.900901	0	N	H	0.99	0.98	0	2.7114	8252610	7491847	1.1	0.98	HN0_1E1_LTQ	7267	2	0.98	18.54	-	-	-	LGGLRPES(p)PESLTSVSR
IPI00012199	CCDC86	R.LGGLRPES#PESLTSVSR.T	0.900901	0	N	H	0.99	0.98	0	2.7114	8252610	7491847	1.1	0.98	HN0_1E1_LTQ	7267	2	0.98	18.54	-	-	-	LGGLRPES(p)PESLTSVSR
IPI00412260	CCDC86	R.LGGLRPES#PESLTSVSR.T	0.909091	0	N	H	0.99	0.98	0	4.0307	13447178	11934853	1.13	0.98	HN0_1E1_MSA	6210	3	0.98	38.04	-	-	-	LGGLRPES(p)PESLTSVSR
IPI00412260	CCDC86	R.LGGLRPES#PESLTSVSR.T	0.909091	0	N	H	0.98	0.96	0	2.8628	1453916	1350516	1.08	0.98	HN0_1E2_LTQ	5029	2	0.98	21.33	-	-	-	LGGLRPES(p)PESLTSVSR
IPI00412260	CCDC86	R.LGGLRPES#PESLTSVSR.T	0.925926	0	N	H	0.99	0.99	0	4.1888	10970952	10101511	1.09	0.98	HN0_1E1_LTQ	7254	3	0.98	23.84	-	-	-	LGGLRPES(p)PESLTSVSR
IPI00412260	CCDC86	R.LGGLRPES#PESLTSVSR.T	0.990099	0	N	H	0.98	0.96	0	3.7243	2003840	1909386	1.05	0.99	HN0_1E2_MSA	5355	3	0.98	21.21	-	-	-	LGGLRPES(p)PESLTSVSR
IPI00412260	CCDC86	R.LGGLR@PES#PESLTSVSR@.T	1.0989	2	N	H	0.99	0.99	0	3.6751	26513788	28790494	0.92	0.99	HN2_1E1_LTQ	8208	3	0.98	14.84	-	-	-	LGGLR()PES(p)PESLTSVSR()
IPI00412260	CCDC86	R.LGGLRPES#PESLTSVSR.T	1.07527	2	N	H	1	0.99	0	3.4498	22246250	23672951	0.94	0.98	HN2_1E1_MSA	7226	2	0.98	18.84	-	-	-	LGGLRPES(p)PESLTSVSR
IPI00012199	CCDC86	R.LGGLRPES#PESLTSVSR.T	1.07527	2	N	H	1	0.99	0	3.4498	22246250	23672951	0.94	0.98	HN2_1E1_MSA	7226	2	0.98	18.84	-	-	-	LGGLRPES(p)PESLTSVSR
IPI00412260	CCDC86	R.LGGLRPES#PESLTSVSR.T	1.08696	2	N	H	1	0.99	0	4.2751	13177846	14234544	0.93	0.98	HN2_1E1_MSA	7212	3	0.98	30.71	-	-	-	LGGLRPES(p)PESLTSVSR
IPI00012199	CCDC86	R.LGGLRPES#PESLTSVSR.T	1.08696	2	N	H	1	0.99	0	4.2751	13177846	14234544	0.93	0.98	HN2_1E1_MSA	7212	3	0.98	30.71	-	-	-	LGGLRPES(p)PESLTSVSR
IPI00412260	CCDC86	R.LGGLRPES#PESLTSVSR.T	1.0989	2	N	H	0.99	0.99	0	3.4555	26513788	28790494	0.92	0.99	HN2_1E1_LTQ	8250	3	0.98	19.53	-	-	-	LGGLRPES(p)PESLTSVSR
IPI00012199	CCDC86	R.LGGLRPES#PESLTSVSR.T	1.0989	2	N	H	0.99	0.99	0	3.4555	26513788	28790494	0.92	0.99	HN2_1E1_LTQ	8250	3	0.98	19.53	-	-	-	LGGLRPES(p)PESLTSVSR
IPI00412260	CCDC86	R.LGGLR@PES#PESLTSVSR@.T	1.2	2	N	L	1	0.99	0	2.6495	23031445	18824166	1.22	0.99	LN2_1E1_LTQ	7678	2	0.98	19.57	-	-	-	LGGLR()PES(p)PESLTSVSR()
IPI00412260	CCDC86	R.LGGLR@PES#PESLTSVSR@.T	1.22	2	N	L	1	0.99	0	3.9197	15842899	12969329	1.22	0.99	LN2_1E1_MSA	6932	3	0.98	38.29	-	-	-	LGGLR()PES(p)PESLTSVSR()
IPI00012199	CCDC86	R.LGGLR@PES#PESLTSVSR@.T	1.22	2	N	L	1	0.99	0	3.9197	15842899	12969329	1.22	0.99	LN2_1E1_MSA	6932	3	0.98	38.29	-	-	-	LGGLR()PES(p)PESLTSVSR()
IPI00412260	CCDC86	R.LGGLR@PES#PESLTSVSR@.T	1.23	2	N	L	1	0.99	0	3.3279	16773299	13461086	1.25	0.98	LN2_1E1_MSA	6995	2	0.98	23.75	-	-	-	LGGLR()PES(p)PESLTSVSR()
IPI00012199	CCDC86	R.LGGLR@PES#PESLTSVSR@.T	1.23	2	N	L	1	0.99	0	3.3279	16773299	13461086	1.25	0.98	LN2_1E1_MSA	6995	2	0.98	23.75	-	-	-	LGGLR()PES(p)PESLTSVSR()
IPI00412260	CCDC86	R.LGGLRPES#PESLTSVSR.T	1.17	2	N	L	1	0.99	0	3.7794	16815188	14327759	1.17	0.98	LN2_1E1_LTQ	7744	3	0.98	25	-	-	-	LGGLRPES(p)PESLTSVSR
IPI00012199	CCDC86	R.LGGLRPES#PESLTSVSR.T	1.17	2	N	L	1	0.99	0	3.7794	16815188	14327759	1.17	0.98	LN2_1E1_LTQ	7744	3	0.98	25	-	-	-	LGGLRPES(p)PESLTSVSR
IPI00412260	CCDC86	R.LGGLRPES#PESLTSVSR.T	1.22	2	N	L	1	0.99	0	4.2551	15842899	12969329	1.22	0.99	LN2_1E1_MSA	6954	3	0.98	26.4	-	-	-	LGGLRPES(p)PESLTSVSR
IPI00412260	CCDC86	R.LGGLR@PES#PESLTSVSR@.T	0.729927	3	N	H	0.97	0.93	0	2.6426	1735454	1324843	1.31	0.99	HN3_1E2_MSA	4998	2	0.98	12.4	-	-	-	LGGLR()PES(p)PESLTSVSR()
IPI00412260	CCDC86	R.LGGLR@PES#PESLTSVSR@.T	0.793651	3	N	H	1	0.99	0	3.6428	24066851	18509657	1.3	1	HN3_1E1_MSA	7267	2	0.98	25.16	-	-	-	LGGLR()PES(p)PESLTSVSR()
IPI00412260	CCDC86	R.LGGLR@PES#PESLTSVSR@.T	0.909091	3	N	H	0.93	0.86	0	3.0979	659763	528157	1.25	0.95	HN3_1E2_MSA	5027	3	0.98	24.52	-	-	-	LGGLR()PES(p)PESLTSVSR()
IPI00412260	CCDC86	R.LGGLRPES#PESLTSVSR.T	0.729927	3	N	H	0.97	0.93	0	3.1532	1735454	1324843	1.31	0.99	HN3_1E2_MSA	5046	2	0.98	21.03	-	-	-	LGGLRPES(p)PESLTSVSR
IPI00412260	CCDC86	R.LGGLRPES#PESLTSVSR.T	0.775194	3	N	H	1	1	0	2.5804	33059673	25368780	1.3	1	HN3_1E1_LTQ	8953	2	0.98	8.26	-	-	-	LGGLRPES(p)PESLTSVSR
IPI00412260	CCDC86	R.LGGLRPES#PESLTSVSR.T	0.793651	3	N	H	1	0.99	0	4.1866	24066851	18509657	1.3	1	HN3_1E1_MSA	7324	2	0.98	16.33	-	-	-	LGGLRPES(p)PESLTSVSR
IPI00412260	CCDC86	R.LGGLRPES#PESLTSVSR.T	0.8	3	N	H	0.99	0.99	0	3.7127	19409817	15826864	1.23	1	HN3_1E1_LTQ	9001	3	0.98	19.02	-	-	-	LGGLRPES(p)PESLTSVSR
IPI00012199	CCDC86	R.LGGLRPES#PESLTSVSR.T	0.8	3	N	H	0.99	0.99	0	3.7127	19409817	15826864	1.23	1	HN3_1E1_LTQ	9001	3	0.98	19.02	-	-	-	LGGLRPES(p)PESLTSVSR
IPI00412260	CCDC86	R.LGGLRPES#PESLTSVSR.T	0.862069	3	N	H	0.97	0.94	0	2.9308	1946332	1603399	1.21	0.98	HN3_1E2_LTQ	6113	2	0.98	17.88	-	-	-	LGGLRPES(p)PESLTSVSR
IPI00412260	CCDC86	R.LGGLR@PES#PESLTSVSR@.T	0.85	3	N	L	1	0.99	0	2.8328	23605758	27622622	0.85	0.98	LN3_1E1_LTQ	8245	2	0.98	25.4	-	-	-	LGGLR()PES(p)PESLTSVSR()
IPI00012199	CCDC86	R.LGGLR@PES#PESLTSVSR@.T	0.85	3	N	L	1	0.99	0	2.8328	23605758	27622622	0.85	0.98	LN3_1E1_LTQ	8245	2	0.98	25.4	-	-	-	LGGLR()PES(p)PESLTSVSR()
IPI00412260	CCDC86	R.LGGLRPES#PESLTSVSR.T	0.84	3	N	L	1	0.99	0	3.3741	13482980	15712763	0.86	0.98	LN3_1E1_MSA	7012	2	0.98	19.57	-	-	-	LGGLRPES(p)PESLTSVSR
IPI00012199	CCDC86	R.LGGLRPES#PESLTSVSR.T	0.84	3	N	L	1	0.99	0	3.1622	13482980	15712763	0.86	0.98	LN3_1E1_MSA	7068	2	0.98	18.18	-	-	-	LGGLRPES(p)PESLTSVSR
IPI00412260	CCDC86	R.LGGLRPES#PESLTSVSR.T	0.85	3	N	L	1	0.99	0	2.8511	23605758	27622622	0.85	0.98	LN3_1E1_LTQ	8207	2	0.98	14.34	-	-	-	LGGLRPES(p)PESLTSVSR
IPI00012199	CCDC86	R.LGGLRPES#PESLTSVSR.T	0.85	3	N	L	1	0.99	0	2.8511	23605758	27622622	0.85	0.98	LN3_1E1_LTQ	8207	2	0.98	14.34	-	-	-	LGGLRPES(p)PESLTSVSR
IPI00412260	CCDC86	R.LGGLRPES#PESLTSVSR.T	0.86	3	N	L	1	0.99	0	4.3307	14454767	17105894	0.85	0.99	LN3_1E1_MSA	7052	3	0.98	31.13	-	-	-	LGGLRPES(p)PESLTSVSR
IPI00012199	CCDC86	R.LGGLRPES#PESLTSVSR.T	0.86	3	N	L	1	0.99	0	4.3307	14454767	17105894	0.85	0.99	LN3_1E1_MSA	7052	3	0.98	31.13	-	-	-	LGGLRPES(p)PESLTSVSR
IPI00412260	CCDC86	R.LGGLRPES#PESLTSVSR.T	0.87	3	N	L	1	1	0	3.6593	23545486	27259063	0.86	0.98	LN3_1E1_LTQ	8196	3	0.98	23.64	-	-	-	LGGLRPES(p)PESLTSVSR
IPI00012199	CCDC86	R.LGGLRPES#PESLTSVSR.T	0.87	3	N	L	1	1	0	3.6593	23545486	27259063	0.86	0.98	LN3_1E1_LTQ	8196	3	0.98	23.64	-	-	-	LGGLRPES(p)PESLTSVSR
IPI00412260	CCDC86	R.LGGLRPES#PESLTSVSR.T	0.414938	4	N	H	0.98	0.97	0	3.6851	2801505	1217899	2.3	0.99	HN4_1E2_MSA	4651	2	0.98	17.64	-	-	-	LGGLRPES(p)PESLTSVSR
IPI00412260	CCDC86	R.LGGLRPES#PESLTSVSR.T	0.423729	4	N	H	1	0.99	0	3.7419	29378323	12317646	2.39	0.98	HN4_1E1_MSA	6527	2	0.98	14.42	-	-	-	LGGLRPES(p)PESLTSVSR
IPI00412260	CCDC86	R.LGGLRPES#PESLTSVSR.T	0.434783	4	N	H	1	0.99	0	2.905	40096243	17271310	2.32	0.98	HN4_1E1_LTQ	8567	2	0.98	14.72	-	-	-	LGGLRPES(p)PESLTSVSR
IPI00412260	CCDC86	R.LGGLRPES#PESLTSVSR.T	0.456621	4	N	H	0.99	0.99	0	3.3524	20218032	9259342	2.18	0.98	HN4_1E1_MSA	6521	3	0.98	29.05	-	-	-	LGGLRPES(p)PESLTSVSR
IPI00446362	CCDC86	R.LGGLR@PES#PESLTSVSR@.T	0.42	4	N	L	0.98	0.95	0	2.7857	1182072	2595843	0.46	0.98	LN4_1E2_LTQ	5630	2	0.98	25.15	-	-	-	LGGLR()PES(p)PESLTSVSR()
IPI00446362	CCDC86	R.LGGLR@PES#PESLTSVSR@.T	0.42	4	N	L	0.98	0.96	0	2.9099	775956	1725624	0.45	0.99	LN4_1E2_MSA	5029	2	0.98	18.27	-	-	-	LGGLR()PES(p)PESLTSVSR()
IPI00446362	CCDC86	R.LGGLR@PES#PESLTSVSR@.T	0.44	4	N	L	0.98	0.96	0	4.0231	1463935	3335248	0.44	0.98	LN4_1E2_LTQ	5643	3	0.98	24.49	-	-	-	LGGLR()PES(p)PESLTSVSR()
IPI00412260	CCDC86	R.LGGLR@PES#PESLTSVSR@.T	0.45	4	N	L	0.99	0.98	0	3.0487	4303283	9593818	0.45	0.98	LN4_1E1_LTQ	7656	2	0.98	24.82	-	-	-	LGGLR()PES(p)PESLTSVSR()
IPI00446362	CCDC86	R.LGGLR@PES#PESLTSVSR@.T	0.45	4	N	L	0.98	0.96	0	3.8974	761429	1680227	0.45	0.98	LN4_1E2_MSA	5046	3	0.98	43.22	-	-	-	LGGLR()PES(p)PESLTSVSR()
IPI00446362	CCDC86	R.LGGLRPES#PESLTSVSR.T	0.42	4	N	L	0.98	0.95	0	2.5931	1182072	2595843	0.46	0.98	LN4_1E2_LTQ	5620	2	0.98	9.59	-	-	-	LGGLRPES(p)PESLTSVSR
IPI00446362	CCDC86	R.LGGLRPES#PESLTSVSR.T	0.42	4	N	L	0.98	0.96	0	3.331	775956	1725624	0.45	0.99	LN4_1E2_MSA	5089	2	0.98	23.65	-	-	-	LGGLRPES(p)PESLTSVSR
IPI00412260	CCDC86	R.LGGLRPES#PESLTSVSR.T	0.43	4	N	L	0.99	0.99	0	3.5319	3124710	7142230	0.44	0.99	LN4_1E1_MSA	6459	2	0.98	19.35	-	-	-	LGGLRPES(p)PESLTSVSR
IPI00012199	CCDC86	R.LGGLRPES#PESLTSVSR.T	0.43	4	N	L	0.99	0.99	0	3.5319	3124710	7142230	0.44	0.99	LN4_1E1_MSA	6459	2	0.98	19.35	-	-	-	LGGLRPES(p)PESLTSVSR
IPI00446362	CCDC86	R.LGGLRPES#PESLTSVSR.T	0.44	4	N	L	0.98	0.96	0	3.601	1463935	3335248	0.44	0.98	LN4_1E2_LTQ	5648	3	0.98	26.26	-	-	-	LGGLRPES(p)PESLTSVSR
IPI00412260	CCDC86	R.LGGLRPES#PESLTSVSR.T	0.45	4	N	L	0.99	0.98	0	2.9219	4303283	9593818	0.45	0.98	LN4_1E1_LTQ	7594	2	0.98	13.67	-	-	-	LGGLRPES(p)PESLTSVSR
IPI00412260	CCDC86	R.LGGLRPES#PESLTSVSR.T	0.49	4	N	L	1	0.99	0	3.38	4730201	9759475	0.48	0.98	LN4_1E1_LTQ	7629	3	0.98	13.2	-	-	-	LGGLRPES(p)PESLTSVSR
IPI00412260	CCDC86	R.LGGLRPES#PESLTSVSR.T	0.5	4	N	L	1	0.99	0	3.7052	3878948	8066476	0.48	1	LN4_1E1_MSA	6492	3	0.98	23.4	-	-	-	LGGLRPES(p)PESLTSVSR
IPI00012199	CCDC86	R.LGGLRPES#PESLTSVSR.T	0.5	4	N	L	1	0.99	0	3.7052	3878948	8066476	0.48	1	LN4_1E1_MSA	6492	3	0.98	23.4	-	-	-	LGGLRPES(p)PESLTSVSR
IPI00446362	CCDC86	R.LGGLRPES#PESLTSVSR.T	0.518135	5	N	H	0.98	0.96	0	2.572	1741120	845652	2.06	0.99	HN5_5E1_LTQ	3777	2	0.98	21.2	-	-	-	LGGLRPES(p)PESLTSVSR
IPI00446362	CCDC86	R.LGGLRPES#PESLTSVSR.T	0.518135	5	N	H	0.98	0.95	0	2.6832	1186157	578637	2.05	0.99	HN5_5E1_MSA	3266	2	0.98	24.06	-	-	-	LGGLRPES(p)PESLTSVSR
IPI00412260	CCDC86	R.LQQGAGLESPQGQPEPGAAS#PQR.Q	0.934579	0	N	H	0.99	0.98	0	4.3973	5101222	4642749	1.1	0.98	HN0_1E1_MSA	4969	3	0.98	93.53	-	-	-	LQQGAGLESPQGQPEPGAAS(p)PQR
IPI00012199	CCDC86	R.LQQGAGLESPQGQPEPGAAS#PQR.Q	0.934579	0	N	H	0.99	0.98	0	4.3973	5101222	4642749	1.1	0.98	HN0_1E1_MSA	4969	3	0.98	93.53	-	-	-	LQQGAGLESPQGQPEPGAAS(p)PQR
IPI00412260	CCDC86	R.LQQGAGLESPQGQPEPGAAS#PQR.Q	0.980392	0	N	H	0.99	0.99	0	4.4362	4901748	4866221	1.01	0.99	HN0_1E1_LTQ	5598	3	0.98	103.29	-	-	-	LQQGAGLESPQGQPEPGAAS(p)PQR
IPI00012199	CCDC86	R.LQQGAGLESPQGQPEPGAAS#PQR.Q	0.980392	0	N	H	0.99	0.99	0	4.4362	4901748	4866221	1.01	0.99	HN0_1E1_LTQ	5598	3	0.98	103.29	-	-	-	LQQGAGLESPQGQPEPGAAS(p)PQR
IPI00412260	CCDC86	R.LQQGAGLESPQGQPEPGAAS#PQR@.Q	0.934579	0	N	H	0.99	0.98	0	4.5165	5101222	4642749	1.1	0.98	HN0_1E1_MSA	4976	3	0.98	101.86	-	-	-	LQQGAGLESPQGQPEPGAAS(p)PQR()
IPI00012199	CCDC86	R.LQQGAGLESPQGQPEPGAAS#PQR@.Q	0.934579	0	N	H	0.99	0.98	0	4.5165	5101222	4642749	1.1	0.98	HN0_1E1_MSA	4976	3	0.98	101.86	-	-	-	LQQGAGLESPQGQPEPGAAS(p)PQR()
IPI00012199	CCDC86	R.LQQGAGLESPQGQPEPGAAS#PQR@.Q	0.980392	0	N	H	0.99	0.99	0	4.2385	4901748	4866221	1.01	0.99	HN0_1E1_LTQ	5571	3	0.98	127.94	-	-	-	LQQGAGLESPQGQPEPGAAS(p)PQR()
IPI00412260	CCDC86	R.LQQGAGLESPQGQPEPGAAS#PQR@.Q	0.980392	0	N	H	0.99	0.99	0	5.1234	4901748	4866221	1.01	0.99	HN0_1E1_LTQ	5638	3	0.98	87.34	-	-	-	LQQGAGLESPQGQPEPGAAS(p)PQR()
IPI00412260	CCDC86	R.LQQGAGLESPQGQPEPGAAS#PQR.Q	1.14943	2	N	H	0.99	0.99	0	4.224	4863108	5234810	0.93	0.99	HN2_1E1_LTQ	6239	3	0.98	117.47	-	-	-	LQQGAGLESPQGQPEPGAAS(p)PQR
IPI00012199	CCDC86	R.LQQGAGLESPQGQPEPGAAS#PQR.Q	1.17647	2	N	H	0.97	0.94	0	3.7116	4921145	5779477	0.85	0.91	HN2_1E1_LTQ	6360	3	0.98	39	-	-	-	LQQGAGLESPQGQPEPGAAS(p)PQR
IPI00412260	CCDC86	R.LQQGAGLESPQGQPEPGAAS#PQR.Q	1.25	2	N	H	0.96	0.91	1.27249e-11	4.5155	1848843	1998953	0.92	0.95	HN2_1E1_MSA	5517	3	0.98	93.82	-	-	-	LQQGAGLESPQGQPEPGAAS(p)PQR
IPI00412260	CCDC86	R.LQQGAGLESPQGQPEPGAAS#PQR@.Q	1.14943	2	N	H	0.99	0.99	0	4.7038	4863108	5234810	0.93	0.99	HN2_1E1_LTQ	6240	3	0.98	119.71	-	-	-	LQQGAGLESPQGQPEPGAAS(p)PQR()
IPI00012199	CCDC86	R.LQQGAGLESPQGQPEPGAAS#PQR@.Q	1.14943	2	N	H	0.99	0.99	0	4.7038	4863108	5234810	0.93	0.99	HN2_1E1_LTQ	6240	3	0.98	119.71	-	-	-	LQQGAGLESPQGQPEPGAAS(p)PQR()
IPI00412260	CCDC86	R.LQQGAGLESPQGQPEPGAAS#PQR@.Q	1.33333	2	N	H	0.95	0.9	1.11022e-16	5.0257	1974805	2352026	0.84	0.95	HN2_1E1_MSA	5626	3	0.98	110.08	-	-	-	LQQGAGLESPQGQPEPGAAS(p)PQR()
IPI00012199	CCDC86	R.LQQGAGLESPQGQPEPGAAS#PQR@.Q	1.33333	2	N	H	0.95	0.9	1.11022e-16	5.0257	1974805	2352026	0.84	0.95	HN2_1E1_MSA	5626	3	0.98	110.08	-	-	-	LQQGAGLESPQGQPEPGAAS(p)PQR()
IPI00412260	CCDC86	R.LQQGAGLESPQGQPEPGAAS#PQR.Q	1.25	2	N	L	0.98	0.97	9.21485e-15	4.1521	2438359	1931854	1.26	0.98	LN2_1E1_LTQ	5758	3	0.98	97.6	-	-	-	LQQGAGLESPQGQPEPGAAS(p)PQR
IPI00412260	CCDC86	R.LQQGAGLESPQGQPEPGAAS#PQR.Q	1.28	2	N	L	0.99	0.98	8.06022e-14	3.8065	2196058	1814545	1.21	0.99	LN2_1E1_MSA	5225	3	0.98	72.09	-	-	-	LQQGAGLESPQGQPEPGAAS(p)PQR
IPI00012199	CCDC86	R.LQQGAGLESPQGQPEPGAAS#PQR.Q	1.28	2	N	L	0.99	0.98	8.06022e-14	3.8065	2196058	1814545	1.21	0.99	LN2_1E1_MSA	5225	3	0.98	72.09	-	-	-	LQQGAGLESPQGQPEPGAAS(p)PQR
IPI00412260	CCDC86	R.LQQGAGLESPQGQPEPGAAS#PQR.Q	1.5	2	N	L	0.91	0.82	6.55032e-15	3.0337	865880	629406	1.38	0.98	LN2_1E6_MSA	3231	3	0.98	36.2	-	-	-	LQQGAGLESPQGQPEPGAAS(p)PQR
IPI00446362	CCDC86	R.LQQGAGLESPQGQPEPGAAS#PQR.Q	1.57	2	N	L	0.91	0.82	0	3.7662	702116	462894	1.52	0.99	LN2_1E6_LTQ	3079	3	0.98	84.06	-	-	-	LQQGAGLESPQGQPEPGAAS(p)PQR
IPI00412260	CCDC86	R.LQQGAGLESPQGQPEPGAAS#PQR@.Q	1.07	2	N	L	0.96	0.92	0	4.2044	3022908	2740274	1.1	0.92	LN2_1E1_LTQ	5837	3	0.98	58.31	-	-	-	LQQGAGLESPQGQPEPGAAS(p)PQR()
IPI00012199	CCDC86	R.LQQGAGLESPQGQPEPGAAS#PQR@.Q	1.07	2	N	L	0.96	0.92	0	4.2044	3022908	2740274	1.1	0.92	LN2_1E1_LTQ	5837	3	0.98	58.31	-	-	-	LQQGAGLESPQGQPEPGAAS(p)PQR()
IPI00412260	CCDC86	R.LQQGAGLESPQGQPEPGAAS#PQR@.Q	1.28	2	N	L	0.99	0.98	8.06022e-14	3.8164	2196058	1814545	1.21	0.99	LN2_1E1_MSA	5241	3	0.98	125.91	-	-	-	LQQGAGLESPQGQPEPGAAS(p)PQR()
IPI00012199	CCDC86	R.LQQGAGLESPQGQPEPGAAS#PQR@.Q	1.28	2	N	L	0.99	0.98	8.06022e-14	3.8164	2196058	1814545	1.21	0.99	LN2_1E1_MSA	5241	3	0.98	125.91	-	-	-	LQQGAGLESPQGQPEPGAAS(p)PQR()
IPI00412260	CCDC86	R.LQQGAGLESPQGQPEPGAAS#PQR.Q	1.05263	3	N	H	0.99	0.98	0	4.5776	3572138	3771558	0.95	0.97	HN3_1E1_MSA	5543	3	0.98	93.69	-	-	-	LQQGAGLESPQGQPEPGAAS(p)PQR
IPI00412260	CCDC86	R.LQQGAGLESPQGQPEPGAAS#PQR.Q	1.20482	3	N	H	0.98	0.95	0	4.3799	7949160	8813679	0.9	0.98	HN3_1E1_LTQ	6764	3	0.98	89.1	-	-	-	LQQGAGLESPQGQPEPGAAS(p)PQR
IPI00012199	CCDC86	R.LQQGAGLESPQGQPEPGAAS#PQR.Q	1.21951	3	N	H	0.96	0.92	0	3.3547	4298692	4659114	0.92	0.93	HN3_1E1_LTQ	6903	3	0.98	54.8	-	-	-	LQQGAGLESPQGQPEPGAAS(p)PQR
IPI00412260	CCDC86	R.LQQGAGLESPQGQPEPGAAS#PQR@.Q	1.05263	3	N	H	0.99	0.98	0	4.5822	3572138	3771558	0.95	0.97	HN3_1E1_MSA	5491	3	0.98	141.37	-	-	-	LQQGAGLESPQGQPEPGAAS(p)PQR()
IPI00412260	CCDC86	R.LQQGAGLESPQGQPEPGAAS#PQR@.Q	1.19048	3	N	H	0.98	0.96	0	3.8662	12187886	13400295	0.91	0.59	HN3_1E1_LTQ	6831	3	0.98	74.37	-	-	-	LQQGAGLESPQGQPEPGAAS(p)PQR()
IPI00412260	CCDC86	R.LQQGAGLESPQGQPEPGAAS#PQR.Q	0.96	3	N	L	0.89	0.79	4.90395e-09	3.1799	2340239	2465160	0.95	0.83	LN3_1E1_MSA	5434	3	0.98	55.53	-	-	-	LQQGAGLESPQGQPEPGAAS(p)PQR
IPI00012199	CCDC86	R.LQQGAGLESPQGQPEPGAAS#PQR.Q	0.96	3	N	L	0.89	0.79	4.90395e-09	3.1799	2340239	2465160	0.95	0.83	LN3_1E1_MSA	5434	3	0.98	55.53	-	-	-	LQQGAGLESPQGQPEPGAAS(p)PQR
IPI00412260	CCDC86	R.LQQGAGLESPQGQPEPGAAS#PQR.Q	1.11	3	N	L	1	0.99	0	4.5204	5521131	5113140	1.08	1	LN3_1E1_LTQ	6125	3	0.98	98.93	-	-	-	LQQGAGLESPQGQPEPGAAS(p)PQR
IPI00012199	CCDC86	R.LQQGAGLESPQGQPEPGAAS#PQR.Q	1.11	3	N	L	1	0.99	0	4.5204	5521131	5113140	1.08	1	LN3_1E1_LTQ	6125	3	0.98	98.93	-	-	-	LQQGAGLESPQGQPEPGAAS(p)PQR
IPI00012199	CCDC86	R.LQQGAGLESPQGQPEPGAAS#PQR@.Q	0.96	3	N	L	0.89	0.79	4.90395e-09	4.0146	2340239	2465160	0.95	0.83	LN3_1E1_MSA	5440	3	0.98	102.49	-	-	-	LQQGAGLESPQGQPEPGAAS(p)PQR()
IPI00012199	CCDC86	R.LQQGAGLESPQGQPEPGAAS#PQR@.Q	0.99	3	N	L	0.97	0.94	0	4.094	5131900	5051695	1.02	0.9	LN3_1E1_LTQ	6229	3	0.98	111.54	-	-	-	LQQGAGLESPQGQPEPGAAS(p)PQR()
IPI00412260	CCDC86	R.LQQGAGLESPQGQPEPGAAS#PQR@.Q	1.03	3	N	L	0.97	0.94	0	4.0469	5540871	5476722	1.01	0.62	LN3_1E1_MSA	5393	3	0.98	119.46	-	-	-	LQQGAGLESPQGQPEPGAAS(p)PQR()
IPI00412260	CCDC86	R.LQQGAGLESPQGQPEPGAAS#PQR@.Q	1.11	3	N	L	1	0.99	0	4.1276	5521131	5113140	1.08	1	LN3_1E1_LTQ	6077	3	0.98	81.03	-	-	-	LQQGAGLESPQGQPEPGAAS(p)PQR()
IPI00412260	CCDC86	R.LQQGAGLESPQGQPEPGAAS#PQR.Q	0.531915	4	N	H	0.93	0.86	1.11022e-16	4.0087	1610364	811353	1.98	0.63	HN4_1E1_MSA	4986	2	0.98	83.1	-	-	-	LQQGAGLESPQGQPEPGAAS(p)PQR
IPI00412260	CCDC86	R.LQQGAGLESPQGQPEPGAAS#PQR.Q	0.591716	4	N	H	0.99	0.99	0	4.1768	10800504	6643680	1.63	0.63	HN4_1E1_MSA	4992	3	0.98	79.09	-	-	-	LQQGAGLESPQGQPEPGAAS(p)PQR
IPI00412260	CCDC86	R.LQQGAGLESPQGQPEPGAAS#PQR.Q	0.606061	4	N	H	0.99	0.97	0	4.2608	11847505	7079735	1.67	0.99	HN4_1E1_LTQ	6545	3	0.98	84.44	-	-	-	LQQGAGLESPQGQPEPGAAS(p)PQR
IPI00412260	CCDC86	R.LQQGAGLESPQGQPEPGAAS#PQR.Q	0.689655	4	N	H	0.93	0.86	9.10383e-15	3.1827	1733045	1014544	1.71	0.97	HN4_1E1_LTQ	6527	2	0.98	57.43	-	-	-	LQQGAGLESPQGQPEPGAAS(p)PQR
IPI00412260	CCDC86	R.LQQGAGLESPQGQPEPGAAS#PQR.Q	0.49	4	N	L	0.99	0.99	0	4.1054	1947017	3809803	0.51	0.99	LN4_1E1_MSA	4837	3	0.98	72.31	-	-	-	LQQGAGLESPQGQPEPGAAS(p)PQR
IPI00012199	CCDC86	R.LQQGAGLESPQGQPEPGAAS#PQR.Q	0.49	4	N	L	0.99	0.99	0	3.775	1947017	3809803	0.51	0.99	LN4_1E1_MSA	4891	3	0.98	96.3	-	-	-	LQQGAGLESPQGQPEPGAAS(p)PQR
IPI00412260	CCDC86	R.LQQGAGLESPQGQPEPGAAS#PQR.Q	0.51	4	N	L	0.99	0.98	0	3.8347	2464593	4681808	0.53	0.98	LN4_1E1_LTQ	5753	3	0.98	95.09	-	-	-	LQQGAGLESPQGQPEPGAAS(p)PQR
IPI00412260	CCDC86	R.LQQGAGLESPQGQPEPGAAS#PQR@.Q	0.49	4	N	L	0.99	0.99	0	4.669	1947017	3809803	0.51	0.99	LN4_1E1_MSA	4879	3	0.98	129.1	-	-	-	LQQGAGLESPQGQPEPGAAS(p)PQR()
IPI00012199	CCDC86	R.LQQGAGLESPQGQPEPGAAS#PQR@.Q	0.49	4	N	L	0.99	0.99	0	4.669	1947017	3809803	0.51	0.99	LN4_1E1_MSA	4879	3	0.98	129.1	-	-	-	LQQGAGLESPQGQPEPGAAS(p)PQR()
IPI00412260	CCDC86	R.LQQGAGLESPQGQPEPGAAS#PQR@.Q	0.51	4	N	L	0.99	0.98	0	4.8136	2464593	4681808	0.53	0.98	LN4_1E1_LTQ	5762	3	0.98	140.43	-	-	-	LQQGAGLESPQGQPEPGAAS(p)PQR()
IPI00412260	CCDC86	R.LQQGAGLESPQGQPEPGAAS#PQR.Q	0.588235	5	N	H	0.91	0.84	1.11022e-16	3.1654	2059450	1073581	1.92	0.97	HN5_1E1_MSA	3620	2	0.98	45.12	-	-	-	LQQGAGLESPQGQPEPGAAS(p)PQR
IPI00012199	CCDC86	R.LQQGAGLESPQGQPEPGAAS#PQR.Q	0.588235	5	N	H	0.91	0.84	1.11022e-16	3.1654	2059450	1073581	1.92	0.97	HN5_1E1_MSA	3620	2	0.98	45.12	-	-	-	LQQGAGLESPQGQPEPGAAS(p)PQR
IPI00412260	CCDC86	R.LQQGAGLESPQGQPEPGAAS#PQR.Q	0.595238	5	N	H	0.96	0.91	0	3.0565	2346658	1216860	1.93	0.97	HN5_1E1_LTQ	3937	2	0.98	57.63	-	-	-	LQQGAGLESPQGQPEPGAAS(p)PQR
IPI00412260	CCDC86	R.LQQGAGLESPQGQPEPGAAS#PQR.Q	0.595238	5	N	H	0.96	0.93	0	4.3389	6912919	4134981	1.67	0.97	HN5_1E1_LTQ	3974	3	0.98	103.33	-	-	-	LQQGAGLESPQGQPEPGAAS(p)PQR
IPI00412260	CCDC86	R.LQQGAGLESPQGQPEPGAAS#PQR.Q	0.657895	5	N	H	0.95	0.9	0	4.7618	4623539	2978675	1.55	0.97	HN5_1E1_MSA	3632	3	0.98	71.5	-	-	-	LQQGAGLESPQGQPEPGAAS(p)PQR
IPI00412260	CCDC86	R.LQQGAGLESPQGQPEPGAAS#PQR@.Q	0.909091	5	N	H	0.78	0.6	1.2344e-07	3.8223	3789771	2435183	1.56	0.93	HN5_1E1_LTQ	4090	3	0.98	99.99	-	-	-	LQQGAGLESPQGQPEPGAAS(p)PQR()
IPI00412260	CCDC86	R.LQQGAGLESPQGQPEPGAAS#PQR.Q	0.56	5	N	L	0.98	0.96	0	3.8885	3559166	6395578	0.56	0.97	LN5_1E1_LTQ	3900	3	0.98	46.02	-	-	-	LQQGAGLESPQGQPEPGAAS(p)PQR
IPI00012199	CCDC86	R.LQQGAGLESPQGQPEPGAAS#PQR.Q	0.56	5	N	L	0.98	0.96	0	3.8885	3559166	6395578	0.56	0.97	LN5_1E1_LTQ	3900	3	0.98	46.02	-	-	-	LQQGAGLESPQGQPEPGAAS(p)PQR
IPI00412260	CCDC86	R.LQQGAGLESPQGQPEPGAAS#PQR.Q	0.63	5	N	L	0.98	0.95	0	2.7268	2017939	3130974	0.64	0.98	LN5_1E1_LTQ	3893	2	0.98	42.13	-	-	-	LQQGAGLESPQGQPEPGAAS(p)PQR
IPI00412260	CCDC86	R.LQQGAGLESPQGQPEPGAAS#PQR.Q	0.63	5	N	L	0.97	0.95	0	3.7929	2244002	3718775	0.6	0.96	LN5_1E1_MSA	3604	3	0.98	59.76	-	-	-	LQQGAGLESPQGQPEPGAAS(p)PQR
IPI00012199	CCDC86	R.LQQGAGLESPQGQPEPGAAS#PQR.Q	0.63	5	N	L	0.97	0.95	0	3.7929	2244002	3718775	0.6	0.96	LN5_1E1_MSA	3604	3	0.98	59.76	-	-	-	LQQGAGLESPQGQPEPGAAS(p)PQR
IPI00012199	CCDC86	R.LQQGAGLESPQGQPEPGAAS#PQR@.Q	0.47	5	N	L	0.88	0.77	0	3.2668	4410255	7878435	0.56	0.7	LN5_1E1_LTQ	4163	3	0.98	50.81	-	-	-	LQQGAGLESPQGQPEPGAAS(p)PQR()
IPI00412260	CCDC86	R.LQQGAGLESPQGQPEPGAAS#PQR@.Q	0.5	5	N	L	0.9	0.81	0	3.7012	3029993	5586500	0.54	0.74	LN5_1E1_MSA	3801	3	0.98	45.29	-	-	-	LQQGAGLESPQGQPEPGAAS(p)PQR()
IPI00412260	CCDC86	R.LQQGAGLESPQGQPEPGAAS#PQR@.Q	0.56	5	N	L	0.98	0.96	0	4.1778	3559166	6395578	0.56	0.97	LN5_1E1_LTQ	3881	3	0.98	82.6	-	-	-	LQQGAGLESPQGQPEPGAAS(p)PQR()
IPI00412260	CCDC86	R.LQQGAGLESPQGQPEPGAAS#PQR@.Q	0.63	5	N	L	0.98	0.95	0	2.6357	2017939	3130974	0.64	0.98	LN5_1E1_LTQ	3884	2	0.98	59.65	-	-	-	LQQGAGLESPQGQPEPGAAS(p)PQR()
IPI00012199	CCDC86	R.LQQGAGLESPQGQPEPGAAS#PQR@.Q	0.63	5	N	L	0.98	0.95	0	2.6357	2017939	3130974	0.64	0.98	LN5_1E1_LTQ	3884	2	0.98	59.65	-	-	-	LQQGAGLESPQGQPEPGAAS(p)PQR()
IPI00012199	CCDC86	R.LQQGAGLESPQGQPEPGAAS#PQR@.Q	0.63	5	N	L	0.97	0.95	0	3.4056	2244002	3718775	0.6	0.96	LN5_1E1_MSA	3640	3	0.98	94.69	-	-	-	LQQGAGLESPQGQPEPGAAS(p)PQR()
IPI00787908	CCNL2	K.AKADS#PVNGLPK.G	0.793651	5	N	H	0.44	0.19	0.0227873	2.5686	80935	29749	2.72	0.88	HN5_7E1_MSA	1762	2	0.98	0	-	-	-	AKADS(p)PVNGLPK
IPI00909844	CCNL2	R.GLLPGGTQVLDGTSGFS#PAPK.L	0.826446	2	N	H	0.95	0.9	0	3.4076	2110807	1694298	1.25	0.98	HN2_1E1_LTQ	10650	2	0.98	25.03	-	-	-	GLLPGGTQVLDGTSGFS(p)PAPK
IPI00909844	CCNL2	R.GLLPGGTQVLDGTSGFS#PAPK.L	0.884956	2	N	H	0.94	0.89	2.22045e-16	3.3782	1649143	1372641	1.2	0.96	HN2_1E1_MSA	9326	2	0.98	32.17	-	-	-	GLLPGGTQVLDGTSGFS(p)PAPK
IPI00909844	CCNL2	R.GLLPGGTQVLDGTSGFS#PAPK^.L	0.884956	2	N	H	0.94	0.89	2.22045e-16	3.515	1649143	1372641	1.2	0.96	HN2_1E1_MSA	9343	2	0.98	0	-	-	-	GLLPGGTQVLDGTSGFS(p)PAPK()
IPI00909844	CCNL2	R.GLLPGGTQVLDGTSGFS#PAPK.L	1.14	2	N	L	0.95	0.9	0	3.2731	1853895	1697167	1.09	0.98	LN2_1E1_LTQ	10138	2	0.98	28.23	-	-	-	GLLPGGTQVLDGTSGFS(p)PAPK
IPI00909844	CCNL2	R.GLLPGGTQVLDGTSGFS#PAPK.L	1.18	2	N	L	0.97	0.94	0	3.4988	1383901	1135325	1.22	0.96	LN2_1E1_MSA	9178	2	0.98	39	-	-	-	GLLPGGTQVLDGTSGFS(p)PAPK
IPI00909844	CCNL2	R.GLLPGGTQVLDGTSGFS#PAPK^.L	1.18	2	N	L	0.97	0.94	0	3.1737	1383901	1135325	1.22	0.96	LN2_1E1_MSA	9180	2	0.98	22.5	-	-	-	GLLPGGTQVLDGTSGFS(p)PAPK()
IPI00909844	CCNL2	R.GLLPGGTQVLDGTSGFS#PAPK.L	0.330033	3	N	H	0.87	0.76	1.31295e-10	3.78	1602062	540023	2.97	0.97	HN3_1E1_MSA	9667	2	0.98	41.36	-	-	-	GLLPGGTQVLDGTSGFS(p)PAPK
IPI00909844	CCNL2	R.GLLPGGTQVLDGTSGFS#PAPK.L	0.383142	3	N	H	0.93	0.86	7.19146e-11	3.3873	1938994	597337	3.25	0.98	HN3_1E1_LTQ	11777	2	0.98	25.25	-	-	-	GLLPGGTQVLDGTSGFS(p)PAPK
IPI00787908	CCNL2	R.GLLPGGTQVLDGTSGFS#PAPK.L	0.46	3	N	L	0.91	0.83	1.06506e-10	2.765	382631	895789	0.43	0.92	LN3_1E1_MSA	9242	2	0.98	31.68	-	-	-	GLLPGGTQVLDGTSGFS(p)PAPK
IPI00787908	CCNL2	R.GLLPGGTQVLDGTSGFS#PAPK^.L	0.46	3	N	L	0.91	0.83	1.06506e-10	2.8739	382631	895789	0.43	0.92	LN3_1E1_MSA	9227	2	0.98	26.34	-	-	-	GLLPGGTQVLDGTSGFS(p)PAPK()
IPI00787908	CCNL2	R.GLLPGGTQVLDGTSGFS#PAPK.L	0.232019	4	N	H	0.92	0.84	0	4.0017	4366047	1062339	4.11	0.99	HN4_1E1_MSA	8855	2	0.98	49.49	-	-	-	GLLPGGTQVLDGTSGFS(p)PAPK
IPI00787908	CCNL2	R.GLLPGGTQVLDGTSGFS#PAPK.L	0.277008	4	N	H	0.88	0.78	1.68754e-14	3.3851	4971386	1288142	3.86	0.99	HN4_1E1_LTQ	11048	2	0.98	29.83	-	-	-	GLLPGGTQVLDGTSGFS(p)PAPK
IPI00871180	CCNYL1	R.SFS#ADNFIGIQR.S	2.5641	4	N	H	0.29	0.08	0.115692	2.7052	381190	339192	1.12	0.7	HN4_1E1_LTQ	10545	2	0.98	2.46	-	-	-	SFS(p)ADNFIGIQR
IPI00006103	CD2BP2	K.HSLDS#DEEEDDDDGGSSK.Y	0.724638	0	N	H	0.98	0.96	6.4504e-14	4.5391	465189	340917	1.36	0.99	HN0_1E1_LTQ	3682	2	0.98	35.53	-	-	-	HSLDS(p)DEEEDDDDGGSSK
IPI00006103	CD2BP2	K.HSLDS#DEEEDDDDGGSSK^.Y	1.63	2	N	L	0.8	0.65	9.05937e-07	3.3578	136836	62191	2.2	0.96	LN2_1E6_MSA	1953	2	0.98	13.81	-	-	-	HSLDS(p)DEEEDDDDGGSSK()
IPI00006103	CD2BP2	K.HSLDS#DEEEDDDDGGSSK.Y	0.84	3	N	L	0.97	0.95	3.25295e-14	4.2278	336215	368417	0.91	0.97	LN3_1E1_LTQ	4472	2	0.98	12.95	-	-	-	HSLDS(p)DEEEDDDDGGSSK
IPI00006103	CD2BP2	K.HSLDS#DEEEDDDDGGSSK.Y	0.520833	4	N	H	0.97	0.95	0	4.0181	945898	513356	1.84	0.99	HN4_1E1_MSA	1002	2	0.98	40.2	-	-	-	HSLDS(p)DEEEDDDDGGSSK
IPI00006103	CD2BP2	K.HSLDS#DEEEDDDDGGSSK.Y	0.724638	4	N	H	0.74	0.54	1.11022e-16	4.5964	4226508	2234205	1.89	0.82	HN4_1E1_LTQ	4353	2	0.98	37.1	-	-	-	HSLDS(p)DEEEDDDDGGSSK
IPI00909174	CDC73	T.EQIR@SLSEAM*S#VEK^.I	8.33333	2	N	H	0.57	0.32	0.0682273	2.6433	4392	23925	0.18	0.49	HN2_1E6_MSA	4352	2	0.98	20.41	-	-	-	EQIR()SLSEAM()S(p)VEK()
IPI00879287	CDCA5	R.IVAHAVEVPAVQS#PR.R	0.595238	4	N	H	0.54	0.29	0.000314749	2.6798	825650	137956	5.98	0.87	HN4_1E1_LTQ	7288	2	0.98	0	-	-	-	IVAHAVEVPAVQS(p)PR
IPI00785043	CDCA7	R.SR@SR@ILGS#LDALPMEE.E	24.0906	2	N	H	-1	0	1	2.9901	9220	222115	0.04	0.89	HN2_1E6_MSA	5687	2	0.98	16.26	-	-	-	SR()SR()ILGS(p)LDALPMEE
IPI00784657	CDCA7L	K.EVADIFNAPS#DDEEFVGFR.D	0.8	2	N	H	0.99	0.97	0	3.0561	3954208	3504798	1.13	0.99	HN2_1E1_LTQ	11790	2	0.98	0	-	-	-	EVADIFNAPS(p)DDEEFVGFR
IPI00784657	CDCA7L	K.EVADIFNAPS#DDEEFVGFR.D	0.833333	2	N	H	0.98	0.96	0	4.217	3715567	3066413	1.21	0.99	HN2_1E1_MSA	10398	2	0.98	0	-	-	-	EVADIFNAPS(p)DDEEFVGFR
IPI00784657	CDCA7L	K.EVADIFNAPS#DDEEFVGFR@.D	0.8	2	N	H	0.99	0.97	0	3.8276	3954208	3504798	1.13	0.99	HN2_1E1_LTQ	11800	2	0.98	0	-	-	-	EVADIFNAPS(p)DDEEFVGFR()
IPI00784657	CDCA7L	K.EVADIFNAPS#DDEEFVGFR@.D	0.833333	2	N	H	0.98	0.96	0	3.5178	3715567	3066413	1.21	0.99	HN2_1E1_MSA	10403	2	0.98	0	-	-	-	EVADIFNAPS(p)DDEEFVGFR()
IPI00150554	CDCA7L	K.EVADIFNAPS#DDEEFVGFR.D	0.96	2	N	L	0.99	0.98	0	2.729	3162538	3374243	0.94	0.99	LN2_1E1_LTQ	11300	2	0.98	0	-	-	-	EVADIFNAPS(p)DDEEFVGFR
IPI00784657	CDCA7L	K.EVADIFNAPS#DDEEFVGFR.D	0.96	2	N	L	0.99	0.98	0	2.7332	3162538	3374243	0.94	0.99	LN2_1E1_LTQ	11332	2	0.98	0	-	-	-	EVADIFNAPS(p)DDEEFVGFR
IPI00784657	CDCA7L	K.EVADIFNAPS#DDEEFVGFR.D	1	2	N	L	0.98	0.96	0	3.1868	3349924	3619761	0.93	0.98	LN2_1E1_MSA	10353	2	0.98	0	-	-	-	EVADIFNAPS(p)DDEEFVGFR
IPI00784657	CDCA7L	K.EVADIFNAPS#DDEEFVGFR@.D	0.96	2	N	L	0.99	0.98	0	3.4205	3162538	3374243	0.94	0.99	LN2_1E1_LTQ	11334	2	0.98	0	-	-	-	EVADIFNAPS(p)DDEEFVGFR()
IPI00784657	CDCA7L	K.EVADIFNAPS#DDEEFVGFR@.D	1	2	N	L	0.98	0.96	0	3.5299	3349924	3619761	0.93	0.98	LN2_1E1_MSA	10359	2	0.98	0	-	-	-	EVADIFNAPS(p)DDEEFVGFR()
IPI00657791	CDCA7L	K.EVADIFNAPS#DDEEFVGFR.D	1.17647	3	N	H	0.98	0.97	0	4.1485	4295577	5346894	0.8	0.99	HN3_1E1_LTQ	13379	2	0.98	0	-	-	-	EVADIFNAPS(p)DDEEFVGFR
IPI00784657	CDCA7L	K.EVADIFNAPS#DDEEFVGFR.D	1.20482	3	N	H	0.99	0.98	0	4.5325	4342371	5468410	0.79	0.99	HN3_1E1_MSA	11010	2	0.98	0	-	-	-	EVADIFNAPS(p)DDEEFVGFR
IPI00657791	CDCA7L	K.EVADIFNAPS#DDEEFVGFR@.D	1.17647	3	N	H	0.98	0.97	0	3.8936	4295577	5346894	0.8	0.99	HN3_1E1_LTQ	13369	2	0.98	0	-	-	-	EVADIFNAPS(p)DDEEFVGFR()
IPI00784657	CDCA7L	K.EVADIFNAPS#DDEEFVGFR@.D	1.20482	3	N	H	0.99	0.98	0	4.8998	4342371	5468410	0.79	0.99	HN3_1E1_MSA	11009	2	0.98	0	-	-	-	EVADIFNAPS(p)DDEEFVGFR()
IPI00150554	CDCA7L	K.EVADIFNAPS#DDEEFVGFR@.D	1.20482	3	N	H	0.99	0.98	0	4.2558	4342371	5468410	0.79	0.99	HN3_1E1_MSA	11050	2	0.98	0	-	-	-	EVADIFNAPS(p)DDEEFVGFR()
IPI00784657	CDCA7L	K.EVADIFNAPS#DDEEFVGFR.D	1.51	3	N	L	0.99	0.97	0	4.6123	5807391	4174421	1.39	0.99	LN3_1E1_LTQ	11983	2	0.98	0	-	-	-	EVADIFNAPS(p)DDEEFVGFR
IPI00657791	CDCA7L	K.EVADIFNAPS#DDEEFVGFR.D	1.51	3	N	L	0.99	0.98	0	4.2208	5918231	4250082	1.39	0.99	LN3_1E1_MSA	10452	2	0.98	0	-	-	-	EVADIFNAPS(p)DDEEFVGFR
IPI00150554	CDCA7L	K.EVADIFNAPS#DDEEFVGFR@.D	1.51	3	N	L	0.99	0.97	0	2.9936	5807391	4174421	1.39	0.99	LN3_1E1_LTQ	11950	2	0.98	0	-	-	-	EVADIFNAPS(p)DDEEFVGFR()
IPI00784657	CDCA7L	K.EVADIFNAPS#DDEEFVGFR@.D	1.51	3	N	L	0.99	0.97	0	3.5832	5807391	4174421	1.39	0.99	LN3_1E1_LTQ	11990	2	0.98	0	-	-	-	EVADIFNAPS(p)DDEEFVGFR()
IPI00657791	CDCA7L	K.EVADIFNAPS#DDEEFVGFR@.D	1.51	3	N	L	0.99	0.98	0	4.1502	5918231	4250082	1.39	0.99	LN3_1E1_MSA	10427	2	0.98	0	-	-	-	EVADIFNAPS(p)DDEEFVGFR()
IPI00784657	CDCA7L	K.EVADIFNAPS#DDEEFVGFR.D	0.413223	4	N	H	0.98	0.95	0	4.4182	8402299	4091285	2.05	0.99	HN4_1E1_MSA	10120	2	0.98	0	-	-	-	EVADIFNAPS(p)DDEEFVGFR
IPI00784657	CDCA7L	K.EVADIFNAPS#DDEEFVGFR.D	0.44843	4	N	H	0.96	0.92	0	3.6363	6717655	3495444	1.92	0.99	HN4_1E1_LTQ	12387	2	0.98	0	-	-	-	EVADIFNAPS(p)DDEEFVGFR
IPI00784657	CDCA7L	K.EVADIFNAPS#DDEEFVGFR@.D	0.39	4	N	L	0.97	0.95	0	2.5227	983956	2449651	0.4	0.98	LN4_1E1_MSA	9614	2	0.98	0	-	-	-	EVADIFNAPS(p)DDEEFVGFR()
IPI00303099	CDCA8	R.IYNISGNGS#PLADSK.E	1.23457	4	N	H	0.34	0.12	0.0432456	2.9723	649093	347429	1.87	0.94	HN4_1E1_LTQ	7797	2	0.98	12.19	-	-	-	IYNISGNGS(p)PLADSK
IPI00303099	CDCA8	R.IYNISGNGS#PLADSK.E	0.959518	4	N	H	-1	0	1	2.6111	413423	396687	1.04	0.93	HN4_1E1_MSA	5890	2	0.98	6.21	-	-	-	IYNISGNGS(p)PLADSK
IPI00026689	CDK1	K.IGEGTY#GVVYK.A	0.41	4	N	L	0.97	0.94	0	2.6606	551795	1487462	0.37	0.97	LN4_1E1_LTQ	5945	2	0.98	5.88	-	-	-	IGEGTY(p)GVVYK
IPI00556426	CDK11A	R.DLLSDLQDIS#DSER.K	0.884956	0	N	H	0.91	0.84	0	3.0104	1429896	1052906	1.36	0.95	HN0_1E1_LTQ	9396	2	0.98	18.9	-	-	-	DLLSDLQDIS(p)DSER
IPI00942449	CDK11A	R.DLLSDLQDIS#DSER.K	0.952381	2	N	H	0.98	0.97	0	3.3197	8663335	8155699	1.06	0.99	HN2_1E1_LTQ	11207	2	0.98	41.57	-	-	-	DLLSDLQDIS(p)DSER
IPI00556426	CDK11A	R.DLLSDLQDIS#DSER.K	0.961538	2	N	H	0.99	0.98	0	3.0638	6503823	6154713	1.06	0.99	HN2_1E1_MSA	9816	2	0.98	10.82	-	-	-	DLLSDLQDIS(p)DSER
IPI00942449	CDK11A	R.DLLSDLQDIS#DSER@.K	0.952381	2	N	H	0.98	0.97	0	3.9714	8663335	8155699	1.06	0.99	HN2_1E1_LTQ	11179	2	0.98	24.33	-	-	-	DLLSDLQDIS(p)DSER()
IPI00556426	CDK11A	R.DLLSDLQDIS#DSER@.K	0.961538	2	N	H	0.99	0.98	0	3.6303	6503823	6154713	1.06	0.99	HN2_1E1_MSA	9821	2	0.98	29.61	-	-	-	DLLSDLQDIS(p)DSER()
IPI00070809	CDK11A	R.DLLSDLQDIS#DSER@.K	6.66667	2	N	H	0.26	0.07	0.135281	2.7143	194834	255683	0.76	0.06	HN2_1E1_MSA	10290	2	0.98	18.9	-	-	-	DLLSDLQDIS(p)DSER()
IPI00816795	CDK11A	R.DLLSDLQDIS#DSER.K	1.14	2	N	L	0.99	0.97	0	3.6022	8250372	7036412	1.17	0.99	LN2_1E1_LTQ	10713	2	0.98	29	-	-	-	DLLSDLQDIS(p)DSER
IPI00556426	CDK11A	R.DLLSDLQDIS#DSER.K	1.16	2	N	L	0.98	0.96	0	3.7007	7253342	5726184	1.27	0.98	LN2_1E1_MSA	9765	2	0.98	26.93	-	-	-	DLLSDLQDIS(p)DSER
IPI00942449	CDK11A	R.DLLSDLQDIS#DSER.K	1.16	2	N	L	0.98	0.96	0	3.7596	7253342	5726184	1.27	0.98	LN2_1E1_MSA	9820	2	0.98	17.29	-	-	-	DLLSDLQDIS(p)DSER
IPI00816795	CDK11A	R.DLLSDLQDIS#DSER@.K	1.14	2	N	L	0.99	0.97	0	3.8019	8250372	7036412	1.17	0.99	LN2_1E1_LTQ	10677	2	0.98	20.69	-	-	-	DLLSDLQDIS(p)DSER()
IPI00937307	CDK11A	R.DLLSDLQDIS#DSER@.K	1.14	2	N	L	0.99	0.97	0	3.3268	8250372	7036412	1.17	0.99	LN2_1E1_LTQ	10722	2	0.98	29.14	-	-	-	DLLSDLQDIS(p)DSER()
IPI00556426	CDK11A	R.DLLSDLQDIS#DSER@.K	1.16	2	N	L	0.98	0.96	0	3.8058	7253342	5726184	1.27	0.98	LN2_1E1_MSA	9762	2	0.98	28.47	-	-	-	DLLSDLQDIS(p)DSER()
IPI00937307	CDK11A	R.DLLSDLQDIS#DSER@.K	1.16	2	N	L	0.98	0.96	0	3.5608	7253342	5726184	1.27	0.98	LN2_1E1_MSA	9822	2	0.98	14.32	-	-	-	DLLSDLQDIS(p)DSER()
IPI00070809	CDK11A	R.DLLSDLQDIS#DSER.K	0.598802	3	N	H	0.99	0.98	0	3.1249	9656353	5561522	1.74	0.99	HN3_1E1_LTQ	12595	2	0.98	30.39	-	-	-	DLLSDLQDIS(p)DSER
IPI00816795	CDK11A	R.DLLSDLQDIS#DSER.K	0.613497	3	N	H	0.98	0.96	0	4.0444	7154123	4302972	1.66	0.99	HN3_1E1_MSA	10223	2	0.98	37.48	-	-	-	DLLSDLQDIS(p)DSER
IPI00816795	CDK11A	R.DLLSDLQDIS#DSER@.K	0.613497	3	N	H	0.98	0.96	0	3.7514	7154123	4302972	1.66	0.99	HN3_1E1_MSA	10204	2	0.98	26.17	-	-	-	DLLSDLQDIS(p)DSER()
IPI00816795	CDK11A	R.DLLSDLQDIS#DSER.K	0.75	3	N	L	0.97	0.94	0	3.1874	3806543	4864676	0.78	0.99	LN3_1E1_MSA	9792	2	0.98	29.72	-	-	-	DLLSDLQDIS(p)DSER
IPI00937307	CDK11A	R.DLLSDLQDIS#DSER@.K	0.75	3	N	L	0.97	0.94	0	4.0269	3806543	4864676	0.78	0.99	LN3_1E1_MSA	9791	2	0.98	14.71	-	-	-	DLLSDLQDIS(p)DSER()
IPI00070809	CDK11A	R.DLLSDLQDIS#DSER.K	0.378788	4	N	H	0.99	0.98	0	3.7962	20118532	7606335	2.64	0.99	HN4_1E1_MSA	9379	2	0.98	24.63	-	-	-	DLLSDLQDIS(p)DSER
IPI00556426	CDK11A	R.DLLSDLQDIS#DSER.K	0.387597	4	N	H	0.99	0.97	0	3.8014	24610433	9250115	2.66	0.98	HN4_1E1_LTQ	11575	2	0.98	26.93	-	-	-	DLLSDLQDIS(p)DSER
IPI00942449	CDK11A	R.DLLSDLQDIS#DSER.K	0.387597	4	N	H	0.99	0.97	0	3.2429	24610433	9250115	2.66	0.98	HN4_1E1_LTQ	11664	2	0.98	24.42	-	-	-	DLLSDLQDIS(p)DSER
IPI00816795	CDK11A	R.DLLSDLQDIS#DSER@.K	0.42	4	N	L	0.98	0.96	0	3.4138	2320136	4763422	0.49	0.99	LN4_1E1_LTQ	10394	2	0.98	36.83	-	-	-	DLLSDLQDIS(p)DSER()
IPI00937307	CDK11A	R.DLLSDLQDIS#DSER@.K	0.43	4	N	L	0.97	0.95	0	3.7302	2326843	4387865	0.53	0.99	LN4_1E1_MSA	9067	2	0.98	21.61	-	-	-	DLLSDLQDIS(p)DSER()
IPI00556426	CDK11A	R.DLLSDLQDIS#DSER@.K	0.535785	4	N	L	-1	0	1	3.1327	62427	116515	0.54	0.21	LN4_1E1_MSA	9477	2	0.98	17.1	-	-	-	DLLSDLQDIS(p)DSER()
IPI00942449	CDK11A	R.DLLSDLQDIS#DSER.K	0.30303	5	N	H	0.59	0.35	0.0209582	3.0109	243940	52712	4.63	0.61	HN5_1E1_LTQ	7814	2	0.98	31.63	-	-	-	DLLSDLQDIS(p)DSER
IPI00942449	CDK11A	R.DLLSDLQDIS#DSER@.K	0.684932	5	N	H	0.98	0.96	0	2.5795	979168	544286	1.8	0.65	HN5_1E1_LTQ	7773	2	0.98	7.53	-	-	-	DLLSDLQDIS(p)DSER()
IPI00071188	CDK11B	R.DLLSDLQDIS#DSER.K	0.884956	0	N	H	0.91	0.84	0	3.1493	1429896	1052906	1.36	0.95	HN0_1E1_LTQ	9428	2	0.98	7.14	-	-	-	DLLSDLQDIS(p)DSER
IPI00071188	CDK11B	R.DLLSDLQDIS#DSER.K	0.917431	0	N	H	0.84	0.71	4.92717e-13	3.8422	1598047	903759	1.77	0.94	HN0_1E1_MSA	7699	2	0.98	22.12	-	-	-	DLLSDLQDIS(p)DSER
IPI00071188	CDK11B	R.DLLSDLQDIS#DSER.K	0.952381	2	N	H	0.98	0.97	0	3.4647	8663335	8155699	1.06	0.99	HN2_1E1_LTQ	11165	2	0.98	18.9	-	-	-	DLLSDLQDIS(p)DSER
IPI00071188	CDK11B	R.DLLSDLQDIS#DSER.K	0.961538	2	N	H	0.99	0.98	0	3.8493	6503823	6154713	1.06	0.99	HN2_1E1_MSA	9859	2	0.98	37.48	-	-	-	DLLSDLQDIS(p)DSER
IPI00071188	CDK11B	R.DLLSDLQDIS#DSER@.K	0.952381	2	N	H	0.98	0.97	0	4.0097	8663335	8155699	1.06	0.99	HN2_1E1_LTQ	11222	2	0.98	24.63	-	-	-	DLLSDLQDIS(p)DSER()
IPI00071188	CDK11B	R.DLLSDLQDIS#DSER@.K	0.961538	2	N	H	0.99	0.98	0	4.3699	6503823	6154713	1.06	0.99	HN2_1E1_MSA	9866	2	0.98	36.84	-	-	-	DLLSDLQDIS(p)DSER()
IPI00071188	CDK11B	R.DLLSDLQDIS#DSER.K	1.14	2	N	L	0.99	0.97	0	4.0551	8250372	7036412	1.17	0.99	LN2_1E1_LTQ	10668	2	0.98	32.46	-	-	-	DLLSDLQDIS(p)DSER
IPI00071188	CDK11B	R.DLLSDLQDIS#DSER.K	1.16	2	N	L	0.98	0.96	0	3.7991	7253342	5726184	1.27	0.98	LN2_1E1_MSA	9719	2	0.98	18.07	-	-	-	DLLSDLQDIS(p)DSER
IPI00071188	CDK11B	R.DLLSDLQDIS#DSER@.K	1.14	2	N	L	0.99	0.97	0	3.8019	8250372	7036412	1.17	0.99	LN2_1E1_LTQ	10677	2	0.98	20.69	-	-	-	DLLSDLQDIS(p)DSER()
IPI00071188	CDK11B	R.DLLSDLQDIS#DSER@.K	1.16	2	N	L	0.98	0.96	0	3.8058	7253342	5726184	1.27	0.98	LN2_1E1_MSA	9762	2	0.98	28.47	-	-	-	DLLSDLQDIS(p)DSER()
IPI00071188	CDK11B	R.DLLSDLQDIS#DSER.K	0.598802	3	N	H	0.99	0.98	0	3.9244	9656353	5561522	1.74	0.99	HN3_1E1_LTQ	12530	2	0.98	25.13	-	-	-	DLLSDLQDIS(p)DSER
IPI00071188	CDK11B	R.DLLSDLQDIS#DSER.K	0.613497	3	N	H	0.98	0.96	0	4.0444	7154123	4302972	1.66	0.99	HN3_1E1_MSA	10223	2	0.98	37.48	-	-	-	DLLSDLQDIS(p)DSER
IPI00071188	CDK11B	R.DLLSDLQDIS#DSER@.K	0.598802	3	N	H	0.99	0.98	0	3.7035	9656353	5561522	1.74	0.99	HN3_1E1_LTQ	12549	2	0.98	25.22	-	-	-	DLLSDLQDIS(p)DSER()
IPI00071188	CDK11B	R.DLLSDLQDIS#DSER@.K	0.613497	3	N	H	0.98	0.96	0	3.7972	7154123	4302972	1.66	0.99	HN3_1E1_MSA	10249	2	0.98	18.73	-	-	-	DLLSDLQDIS(p)DSER()
IPI00071188	CDK11B	R.DLLSDLQDIS#DSER.K	0.71	3	N	L	0.98	0.96	0	3.2355	5325359	6545302	0.81	0.99	LN3_1E1_LTQ	11332	2	0.98	28.47	-	-	-	DLLSDLQDIS(p)DSER
IPI00071188	CDK11B	R.DLLSDLQDIS#DSER.K	0.75	3	N	L	0.97	0.94	0	3.5556	3806543	4864676	0.78	0.99	LN3_1E1_MSA	9838	2	0.98	30.39	-	-	-	DLLSDLQDIS(p)DSER
IPI00071188	CDK11B	R.DLLSDLQDIS#DSER@.K	0.71	3	N	L	0.98	0.96	0	3.6954	5325359	6545302	0.81	0.99	LN3_1E1_LTQ	11323	2	0.98	32.45	-	-	-	DLLSDLQDIS(p)DSER()
IPI00071188	CDK11B	R.DLLSDLQDIS#DSER@.K	0.75	3	N	L	0.97	0.94	0	4.4738	3806543	4864676	0.78	0.99	LN3_1E1_MSA	9837	2	0.98	26.17	-	-	-	DLLSDLQDIS(p)DSER()
IPI00071188	CDK11B	R.DLLSDLQDIS#DSER.K	0.378788	4	N	H	0.99	0.98	0	3.9782	20118532	7606335	2.64	0.99	HN4_1E1_MSA	9468	2	0.98	28.47	-	-	-	DLLSDLQDIS(p)DSER
IPI00071188	CDK11B	R.DLLSDLQDIS#DSER.K	0.387597	4	N	H	0.99	0.97	0	3.8422	24610433	9250115	2.66	0.98	HN4_1E1_LTQ	11616	2	0.98	28.47	-	-	-	DLLSDLQDIS(p)DSER
IPI00071188	CDK11B	R.DLLSDLQDIS#DSER.K	0.42	4	N	L	0.98	0.96	0	3.3909	2320136	4763422	0.49	0.99	LN4_1E1_LTQ	10434	2	0.98	29.55	-	-	-	DLLSDLQDIS(p)DSER
IPI00071188	CDK11B	R.DLLSDLQDIS#DSER.K	0.43	4	N	L	0.97	0.95	0	3.2457	2326843	4387865	0.53	0.99	LN4_1E1_MSA	9039	2	0.98	26.93	-	-	-	DLLSDLQDIS(p)DSER
IPI00071188	CDK11B	R.DLLSDLQDIS#DSER@.K	0.42	4	N	L	0.98	0.96	0	3.6258	2320136	4763422	0.49	0.99	LN4_1E1_LTQ	10438	2	0.98	34.91	-	-	-	DLLSDLQDIS(p)DSER()
IPI00071188	CDK11B	R.DLLSDLQDIS#DSER@.K	0.43	4	N	L	0.97	0.95	0	3.8095	2326843	4387865	0.53	0.99	LN4_1E1_MSA	9026	2	0.98	32.45	-	-	-	DLLSDLQDIS(p)DSER()
IPI00071188	CDK11B	R.DLLSDLQDIS#DSER.K	0.684932	5	N	H	0.98	0.96	0	4.079	979168	544286	1.8	0.65	HN5_1E1_LTQ	7764	2	0.98	10.22	-	-	-	DLLSDLQDIS(p)DSER
IPI00071188	CDK11B	R.DLLSDLQDIS#DSER.K	0.719424	5	N	H	0.85	0.72	1.55809e-12	4.1836	1441513	738005	1.95	0.92	HN5_1E1_MSA	7295	2	0.98	10.82	-	-	-	DLLSDLQDIS(p)DSER
IPI00071188	CDK11B	R.DLLSDLQDIS#DSER@.K	0.684932	5	N	H	0.98	0.96	0	2.5795	979168	544286	1.8	0.65	HN5_1E1_LTQ	7773	2	0.98	7.53	-	-	-	DLLSDLQDIS(p)DSER()
IPI00071188	CDK11B	R.DLLSDLQDIS#DSER@.K	0.719424	5	N	H	0.85	0.72	1.55809e-12	3.5368	1441513	738005	1.95	0.92	HN5_1E1_MSA	7313	2	0.98	29.44	-	-	-	DLLSDLQDIS(p)DSER()
IPI00071188	CDK11B	R.DLLSDLQDIS#DSER@.K	0.55	5	N	L	0.83	0.69	5.24725e-12	2.7352	186585	350025	0.53	0.94	LN5_1E1_LTQ	7944	2	0.98	9	-	-	-	DLLSDLQDIS(p)DSER()
IPI00071188	CDK11B	R.DLLSDLQDIS#DSER@.K	0.65	5	N	L	0.82	0.67	1.65225e-10	2.7442	183375	293570	0.62	0.91	LN5_1E1_MSA	7197	2	0.98	26.17	-	-	-	DLLSDLQDIS(p)DSER()
IPI00868781	CDK12	K.NSS#PAPPQPAPGK.V	0.4329	5	N	H	0.83	0.69	4.96868e-08	2.5432	139190	58325	2.39	0.92	HN5_3E1_MSA	1585	2	0.98	8.95	-	-	-	NSS(p)PAPPQPAPGK
IPI00910891	CDK12	K.NSS#PAPPQPAPGK.V	0.645161	5	N	H	0.69	0.48	9.38602e-06	2.7818	190702	81378	2.34	0.93	HN5_3E1_LTQ	1708	2	0.98	8.4	-	-	-	NSS(p)PAPPQPAPGK
IPI00910891	CDK12	R.HLLTDLPLPPELPGGDLS#PPDS#PEPK.A	0.92	2	N	L	0.81	0.65	3.33067e-15	4.1068	2453745	2560070	0.96	0.84	LN2_1E1_MSA	10557	3	0.98	99.97	110.9	-	-	HLLTDLPLPPELPGGDLS(p)PPDS(p)PEPK
IPI00910891	CDK12	R.HLLTDLPLPPELPGGDLS#PPDS#PEPK.A	0.847458	3	N	H	0.64	0.41	4.28434e-08	4.4042	3312247	1690214	1.96	0.84	HN3_1E1_MSA	11371	3	0.98	131.41	144.46	-	-	HLLTDLPLPPELPGGDLS(p)PPDS(p)PEPK
IPI00910891	CDK12	R.HLLTDLPLPPELPGGDLS#PPDS#PEPK.A	0.374532	4	N	H	0.83	0.7	0	4.2868	9760349	2914675	3.35	0.95	HN4_1E1_LTQ	12757	3	0.98	156.21	167.18	-	-	HLLTDLPLPPELPGGDLS(p)PPDS(p)PEPK
IPI00868781	CDK12	R.HLLTDLPLPPELPGGDLS#PPDS#PEPK.A	0.404858	4	N	H	0.76	0.58	9.54792e-15	4.7401	9983070	2823247	3.54	0.92	HN4_1E1_MSA	10512	3	0.98	131.84	137.15	-	-	HLLTDLPLPPELPGGDLS(p)PPDS(p)PEPK
IPI00910891	CDK12	R.HLLTDLPLPPELPGGDLS#PPDS#PEPK^.A	0.33	4	N	L	0.56	0.32	2.11622e-05	5.5508	602481	1673469	0.36	0.8	LN4_1E1_MSA	9794	3	0.98	106.48	101.44	-	-	HLLTDLPLPPELPGGDLS(p)PPDS(p)PEPK()
IPI00021175	CDK12	R.HLLTDLPLPPELPGGDLS#PPDS#PEPK^.A	0.33	4	N	L	0.56	0.32	2.11622e-05	4.1433	602481	1673469	0.36	0.8	LN4_1E1_MSA	9822	3	0.98	93.16	89.39	-	-	HLLTDLPLPPELPGGDLS(p)PPDS(p)PEPK()
IPI00456970	CDK13	R.ILELT#PEPDRPR.I	0.280899	4	N	H	0.94	0.88	0	2.5539	1543351	391768	3.94	0.99	HN4_1E2_MSA	3865	2	0.98	0	-	-	-	ILELT(p)PEPDRPR
IPI00968130	CDKN2AIP	R.GIS#SSNEGVEEPSK.K	0.43	3	N	L	0.86	0.75	2.40266e-05	3.1076	208956	561047	0.37	0.93	LN3_1E1_LTQ	4830	2	0.98	23.23	-	-	-	GIS(p)SSNEGVEEPSK
IPI00968130	CDKN2AIP	R.GIS#SSNEGVEEPSK.K	0.584795	4	N	H	0.79	0.62	5.04652e-09	2.6522	281158	136534	2.06	0.88	HN4_1E1_MSA	1993	2	0.98	7.53	-	-	-	GIS(p)SSNEGVEEPSK
IPI00217782	CEBPE	K.APLATAAPPCS#PLLK.A	0.649351	2	N	H	0.78	0.61	8.85452e-09	3.3183	558405	298871	1.87	0.93	HN2_1E1_MSA	7327	2	0.98	49.07	-	-	-	APLATAAPPC()S(p)PLLK
IPI00217782	CEBPE	K.APLATAAPPCS#PLLK^.A	0.57	3	N	L	0.88	0.77	3.72269e-12	2.5886	289583	472394	0.61	0.96	LN3_1E1_MSA	7138	2	0.98	49.11	-	-	-	APLATAAPPC()S(p)PLLK()
IPI00217782	CEBPE	K.APLATAAPPCS#PLLK^.A	0.58	3	N	L	0.91	0.82	0	3.0017	401598	682365	0.59	0.94	LN3_1E1_LTQ	8275	2	0.98	36.76	-	-	-	APLATAAPPC()S(p)PLLK()
IPI00217782	CEBPE	K.APLATAAPPCS#PLLK.A	0.248139	4	N	H	0.77	0.59	7.73806e-09	3.0316	1150861	174490	6.6	0.98	HN4_1E1_MSA	6631	2	0.98	63.19	-	-	-	APLATAAPPC()S(p)PLLK
IPI00217782	CEBPE	K.APLATAAPPCS#PLLK.A	0.497512	5	N	H	0.58	0.34	9.24636e-05	2.6253	742868	175875	4.22	0.86	HN5_1E1_LTQ	5789	2	0.98	47.89	-	-	-	APLATAAPPC()S(p)PLLK
IPI00217782	CEBPE	K.APLATAAPPCS#PLLK.A	0.568182	5	N	H	0.49	0.24	0.00239107	2.6703	129400	37771	3.43	0.88	HN5_2E1_MSA	2527	2	0.98	55.74	-	-	-	APLATAAPPC()S(p)PLLK
IPI00217782	CEBPE	K.APS#PAGPLHK.G	0.469484	0	N	H	0.87	0.75	1.55542e-13	3.4174	1733184	809692	2.14	0.9	HN0_1E2_MSA	2659	3	0.98	0	-	-	-	APS(p)PAGPLHK
IPI00217782	CEBPE	K.APS#PAGPLHK.G	0.555556	0	N	H	0.74	0.55	5.48903e-11	3.4076	2781993	1257185	2.21	0.9	HN0_1E2_LTQ	2550	3	0.98	0	-	-	-	APS(p)PAGPLHK
IPI00217782	CEBPE	K.APS#PAGPLHK.G	1.16	2	N	L	0.88	0.77	1.60268e-10	3.0253	1867984	1443517	1.29	0.93	LN2_1E1_LTQ	4033	3	0.98	0	-	-	-	APS(p)PAGPLHK
IPI00217782	CEBPE	K.APS#PAGPLHK.G	1.16	2	N	L	0.9	0.81	1.51508e-10	3.0807	1433908	1086990	1.32	0.92	LN2_1E1_MSA	3888	3	0.98	0	-	-	-	APS(p)PAGPLHK
IPI00217782	CEBPE	K.APS#PAGPLHK.G	0.76	3	N	L	0.9	0.81	7.73825e-13	3.0329	912183	1092090	0.84	0.97	LN3_1E1_MSA	4078	3	0.98	0	-	-	-	APS(p)PAGPLHK
IPI00217782	CEBPE	K.APS#PAGPLHK.G	0.684932	4	N	H	0.5	0.25	4.22987e-05	3.0729	1183207	258295	4.58	0.75	HN4_1E1_LTQ	3446	3	0.98	0	-	-	-	APS(p)PAGPLHK
IPI00306723	CEBPZ	R.SQLDDHPES#DDEENF.I	1	3	N	H	1	1	0	3.9846	3167001	3189630	0.99	0.97	HN3_1E1_MSA	6218	2	0.98	78.53	-	-	-	SQLDDHPES(p)DDEENF
IPI00306723	CEBPZ	R.SQLDDHPES#DDEENF.I	1	3	N	L	1	1	0	2.9975	2534544	2546584	1	0.98	LN3_1E1_LTQ	7143	2	0.98	65.19	-	-	-	SQLDDHPES(p)DDEENF
IPI00306723	CEBPZ	R.SQLDDHPES#DDEENF.I	1	3	N	L	1	1	0	3.1938	1469686	1478852	0.99	0.99	LN3_1E1_MSA	6136	2	0.98	37.31	-	-	-	SQLDDHPES(p)DDEENF
IPI00306723	CEBPZ	R.SQLDDHPES#DDEENF.I	1.02041	4	N	H	1	1	0	3.0449	1929000	1988386	0.97	0.95	HN4_1E1_MSA	5632	2	0.98	49.42	-	-	-	SQLDDHPES(p)DDEENF
IPI00306723	CEBPZ	R.SQLDDHPES#DDEENF.I	1	4	N	L	1	1	0	2.9617	2769152	2780044	1	0.97	LN4_1E1_LTQ	6667	2	0.98	56.91	-	-	-	SQLDDHPES(p)DDEENF
IPI00306723	CEBPZ	R.SQLDDHPES#DDEENF.I	1	4	N	L	1	1	0	3.2712	1946923	1963022	0.99	0.99	LN4_1E1_MSA	5647	2	0.98	52.01	-	-	-	SQLDDHPES(p)DDEENF
IPI00966949	CENPC1	K.KIEIDNKVS#DEEDKTSEGQER.K	0.299401	5	N	H	0.96	0.92	1.28675e-13	4.174	1745980	474906	3.68	0.98	HN5_9E1_MSA	2798	3	0.98	31.84	-	-	-	KIEIDNKVS(p)DEEDKTSEGQER
IPI00550987	CEP135	A.LRKESTQTTAPHNIVS#LMEKEK.E	0.73	3	N	L	0.07	0.01	0.328123	3.0062	2162460	51341	42.12	0.84	LN3_1E1_LTQ	9542	3	0.98	24.09	-	-	-	LRKESTQTTAPHNIVS(p)LMEKEK
IPI00292871	CEP250	R.LQK^LTGER@DTLAGQTVDLQGEVDS#.L	100	3	N	H	0.3	0.09	0.0362217	2.591	13119	948871	0.01	0.98	HN3_1E2_MSA	7589	2	0.98	3.19	-	-	-	LQK()LTGER()DTLAGQTVDLQGEVDSLQK()LTGER()DT(p)LAGQTVDLQGEVDS(p)
IPI00219363	CHAF1A	K.S#PDLEASLDTLENNCHVGSDIDFRPK.L	1.19	3	N	L	0.79	0.63	8.0797e-10	3.0049	1068305	1300956	0.82	0.8	LN3_1E1_MSA	9752	3	0.98	27.12	-	-	-	S(p)PDLEASLDTLENNC()HVGSDIDFRPK
IPI00219364	CHAF1A	K.S#PDLEASLDTLENNCHVGSDIDFRPK.L	0.653595	4	N	H	0.82	0.66	1.70956e-09	3.0138	2198420	1841939	1.19	0.95	HN4_1E1_MSA	9386	3	0.98	47.89	-	-	-	S(p)PDLEASLDTLENNC()HVGSDIDFRPK
IPI00219364	CHAF1A	K.S#PDLEASLDTLENNCHVGSDIDFRPK.L	0.909091	4	N	H	0.61	0.37	0.000141838	3.0912	2348591	1882105	1.25	0.92	HN4_1E1_LTQ	11596	3	0.98	17.62	-	-	-	S(p)PDLEASLDTLENNC()HVGSDIDFRPK
IPI00219364	CHAF1A	R.IETSIGQSTVIIDLTEDS#NEQPDSLVDHNK.L	0.558659	4	N	H	0.71	0.51	3.36498e-08	3.1209	8237136	2870180	2.87	0.87	HN4_1E1_LTQ	11663	3	0.98	13.5	-	-	-	IETSIGQSTVIIDLTEDS(p)NEQPDSLVDHNK
IPI00465222	CHD3;LOC732272	K.ELQGDGPPSS#PTNDPTVK^.Y	3.0303	3	N	H	0.37	0.14	0.0174871	4.012	1081417	1987201	0.54	0.86	HN3_1E1_LTQ	5893	2	0.98	10.1	-	-	-	ELQGDGPPSS(p)PTNDPTVK()
IPI00465222	CHD3;LOC732272	K.ELQGDGPPSS#PTNDPTVK.Y	0.72	3	N	L	0.9	0.8	7.81746e-11	3.719	572069	781146	0.73	0.96	LN3_1E1_LTQ	5346	2	0.98	8.95	-	-	-	ELQGDGPPSS(p)PTNDPTVK
IPI00465222	CHD3;LOC732272	K.ELQGDGPPSS#PTNDPTVK.Y	8.33333	4	N	H	0.21	0.05	0.152627	3.097	1097720	2535094	0.43	0.94	HN4_1E1_LTQ	5928	2	0.98	10.1	-	-	-	ELQGDGPPSS(p)PTNDPTVK
IPI00465222	CHD3;LOC732272	K.ELQGDGPPSS#PTNDPTVK.Y	0.83	4	N	L	0.94	0.88	7.77156e-16	3.2956	339001	484614	0.7	0.91	LN4_1E1_LTQ	4963	2	0.98	10.1	-	-	-	ELQGDGPPSS(p)PTNDPTVK
IPI00465222	CHD3;LOC732272	K.ELQGDGPPSS#PTNDPTVK.Y	0.917431	5	N	H	0.95	0.9	0	3.0019	1003989	810278	1.24	0.98	HN5_1E1_MSA	3078	2	0.98	5.76	-	-	-	ELQGDGPPSS(p)PTNDPTVK
IPI00465222	CHD3;LOC732272	K.ELQGDGPPSS#PTNDPTVK.Y	0.99	5	N	L	0.95	0.9	0	3.8593	944746	898468	1.05	0.97	LN5_1E1_MSA	3112	2	0.98	10.53	-	-	-	ELQGDGPPSS(p)PTNDPTVK
IPI00465222	CHD3;LOC732272	K.M*ETEADAPS#PAPS#LGER.L	0.3003	5	N	H	0.79	0.63	5.86153e-12	4.0697	1445998	355141	4.07	0.96	HN5_1E1_MSA	3508	2	0.98	71.03	91.75	-	-	M()ETEADAPS(p)PAPS(p)LGER
IPI00465222	CHD3;LOC732272	K.M*ETEADAPS#PAPS#LGER.L	0.490196	5	N	H	0.62	0.39	5.42248e-06	3.3427	1570117	387732	4.05	0.92	HN5_1E1_LTQ	3821	2	0.98	81.51	90.62	-	-	M()ETEADAPS(p)PAPS(p)LGER
IPI00465222	CHD3;LOC732272	K.M*ETEADAPS#PAPS#LGER@.L	0.21	5	N	L	0.83	0.69	5.52262e-10	2.9874	229037	1131099	0.2	0.95	LN5_1E1_MSA	3535	2	0.98	89	86.19	-	-	M()ETEADAPS(p)PAPS(p)LGER()
IPI00465222	CHD3;LOC732272	K.M*ETEADAPS#PAPS#LGER@.L	0.3	5	N	L	0.88	0.77	9.54792e-15	3.1921	472960	1728331	0.27	0.97	LN5_1E1_LTQ	3832	2	0.98	51.84	64.24	-	-	M()ETEADAPS(p)PAPS(p)LGER()
IPI00465222	CHD3;LOC732272	K.M*ETEADAPS#PAPSLGER.L	0.970874	0	N	H	0.9	0.8	1.659e-11	3.7166	436773	410795	1.06	0.95	HN0_1E1_LTQ	5410	2	0.98	21.15	-	-	-	M()ETEADAPS(p)PAPSLGER
IPI00465222	CHD3;LOC732272	K.M*ETEADAPS#PAPSLGER@.L	0.970874	0	N	H	0.9	0.8	1.659e-11	4.2066	436773	410795	1.06	0.95	HN0_1E1_LTQ	5420	2	0.98	17.26	-	-	-	M()ETEADAPS(p)PAPSLGER()
IPI00465222	CHD3;LOC732272	K.M*ETEADAPS#PAPSLGER.L	1.26582	2	N	H	0.87	0.75	7.3587e-09	3.2988	580556	737523	0.79	0.94	HN2_1E1_LTQ	6057	2	0.98	25.96	-	-	-	M()ETEADAPS(p)PAPSLGER
IPI00411592	CHD3;LOC732272	K.M*ETEADAPS#PAPSLGER@.L	1	2	N	H	0.91	0.83	3.33067e-16	4.114	369350	421401	0.88	0.88	HN2_1E1_MSA	5407	2	0.98	7.95	-	-	-	M()ETEADAPS(p)PAPSLGER()
IPI00465222	CHD3;LOC732272	K.M*ETEADAPS#PAPSLGER.L	1.4	2	N	L	0.93	0.87	8.61465e-11	4.0861	666670	546057	1.22	0.98	LN2_1E1_MSA	5151	2	0.98	15.16	-	-	-	M()ETEADAPS(p)PAPSLGER
IPI00465222	CHD3;LOC732272	K.M*ETEADAPS#PAPSLGER.L	1.53	2	N	L	0.95	0.9	0	3.4054	1035932	840861	1.23	0.97	LN2_1E1_LTQ	5569	2	0.98	15.55	-	-	-	M()ETEADAPS(p)PAPSLGER
IPI00465222	CHD3;LOC732272	K.M*ETEADAPS#PAPSLGER@.L	1.53	2	N	L	0.95	0.9	0	4.0728	1035932	840861	1.23	0.97	LN2_1E1_LTQ	5596	2	0.98	16.1	-	-	-	M()ETEADAPS(p)PAPSLGER()
IPI00373870	CHD3;LOC732272	K.M*ETEADAPS#PAPSLGER.L	0.662252	3	N	H	0.88	0.77	3.65319e-12	3.2816	1096806	713956	1.54	0.95	HN3_1E1_LTQ	6509	2	0.98	14.51	-	-	-	M()ETEADAPS(p)PAPSLGER
IPI00465222	CHD3;LOC732272	K.M*ETEADAPS#PAPSLGER.L	0.662252	3	N	H	0.88	0.77	3.65319e-12	3.3586	1096806	713956	1.54	0.95	HN3_1E1_LTQ	6562	2	0.98	17.26	-	-	-	M()ETEADAPS(p)PAPSLGER
IPI00465222	CHD3;LOC732272	K.M*ETEADAPS#PAPSLGER.L	0.869565	3	N	H	0.72	0.52	1.36138e-05	3.34	466842	359469	1.3	0.97	HN3_1E1_MSA	5371	2	0.98	17.26	-	-	-	M()ETEADAPS(p)PAPSLGER
IPI00465222	CHD3;LOC732272	K.M*ETEADAPS#PAPSLGER.L	0.54	3	N	L	0.95	0.91	9.27755e-11	3.3979	321938	618773	0.52	0.98	LN3_1E1_MSA	5224	2	0.98	13.37	-	-	-	M()ETEADAPS(p)PAPSLGER
IPI00465222	CHD3;LOC732272	K.M*ETEADAPS#PAPSLGER.L	0.61	3	N	L	0.97	0.94	0	3.9053	588348	1029737	0.57	0.97	LN3_1E1_LTQ	5974	2	0.98	11.38	-	-	-	M()ETEADAPS(p)PAPSLGER
IPI00465222	CHD3;LOC732272	K.M*ETEADAPS#PAPSLGER@.L	0.54	3	N	L	0.95	0.91	9.27755e-11	3.899	321938	618773	0.52	0.98	LN3_1E1_MSA	5217	2	0.98	6.81	-	-	-	M()ETEADAPS(p)PAPSLGER()
IPI00465222	CHD3;LOC732272	K.M*ETEADAPS#PAPSLGER@.L	0.61	3	N	L	0.97	0.94	0	3.5675	588348	1029737	0.57	0.97	LN3_1E1_LTQ	5948	2	0.98	35.66	-	-	-	M()ETEADAPS(p)PAPSLGER()
IPI00411592	CHD3;LOC732272	K.M*ETEADAPS#PAPSLGER.L	1.02041	4	N	H	0.51	0.26	0.0102493	4.4773	580071	451171	1.29	0.97	HN4_1E1_MSA	4882	2	0.98	10.38	-	-	-	M()ETEADAPS(p)PAPSLGER
IPI00465222	CHD3;LOC732272	K.M*ETEADAPS#PAPSLGER.L	1.11111	4	N	H	0.63	0.4	0.000195347	4.0663	947831	738673	1.28	0.96	HN4_1E1_LTQ	6356	2	0.98	24.82	-	-	-	M()ETEADAPS(p)PAPSLGER
IPI00465222	CHD3;LOC732272	K.M*ETEADAPS#PAPSLGER@.L	0.31	4	N	L	0.86	0.73	4.99989e-09	2.9689	122631	445886	0.28	0.94	LN4_1E1_MSA	4742	2	0.98	9.17	-	-	-	M()ETEADAPS(p)PAPSLGER()
IPI00465222	CHD3;LOC732272	K.M*ETEADAPS#PAPSLGER@.L	0.4	4	N	L	0.88	0.78	1.97422e-10	2.7073	165452	489512	0.34	0.97	LN4_1E1_LTQ	5614	2	0.98	13.35	-	-	-	M()ETEADAPS(p)PAPSLGER()
IPI00465222	CHD3;LOC732272	K.M*ETEADAPS#PAPSLGER.L	0.574713	5	N	H	0.65	0.42	1.35192e-08	3.7073	1986600	1026268	1.94	0.97	HN5_1E1_LTQ	3810	2	0.98	16.1	-	-	-	M()ETEADAPS(p)PAPSLGER
IPI00465222	CHD3;LOC732272	K.M*ETEADAPS#PAPSLGER.L	0.591716	5	N	H	0.67	0.45	4.01438e-08	3.9148	1561954	830933	1.88	0.98	HN5_1E1_MSA	3491	2	0.98	13.92	-	-	-	M()ETEADAPS(p)PAPSLGER
IPI00411592	CHD3;LOC732272	K.M*ETEADAPS#PAPSLGER.L	0.847458	5	N	H	0.68	0.46	5.70056e-07	3.6271	273378	132823	2.06	0.92	HN5_2E1_MSA	1902	2	0.98	17.73	-	-	-	M()ETEADAPS(p)PAPSLGER
IPI00465222	CHD3;LOC732272	K.M*ETEADAPS#PAPSLGER@.L	0.574713	5	N	H	0.65	0.42	1.35192e-08	3.7503	1986600	1026268	1.94	0.97	HN5_1E1_LTQ	3828	2	0.98	29.64	-	-	-	M()ETEADAPS(p)PAPSLGER()
IPI00411592	CHD3;LOC732272	K.M*ETEADAPS#PAPSLGER.L	0.33	5	N	L	0.9	0.82	0	3.5437	245472	720235	0.34	0.97	LN5_2E1_LTQ	2441	2	0.98	36.28	-	-	-	M()ETEADAPS(p)PAPSLGER
IPI00411592	CHD3;LOC732272	K.M*ETEADAPS#PAPSLGER@.L	0.33	5	N	L	0.9	0.82	0	3.1122	245472	720235	0.34	0.97	LN5_2E1_LTQ	2457	2	0.98	19.88	-	-	-	M()ETEADAPS(p)PAPSLGER()
IPI00465222	CHD3;LOC732272	K.M*ETEADAPS#PAPSLGER@.L	0.38	5	N	L	0.81	0.65	1.31025e-10	3.1685	247880	614618	0.4	0.95	LN5_2E1_MSA	2138	2	0.98	4.26	-	-	-	M()ETEADAPS(p)PAPSLGER()
IPI00465222	CHD3;LOC732272	K.M*ETEADAPS#PAPSLGER@.L	0.41	5	N	L	0.91	0.83	2.33147e-15	4.4264	629006	1325839	0.47	0.98	LN5_1E1_MSA	3501	2	0.98	19.17	-	-	-	M()ETEADAPS(p)PAPSLGER()
IPI00465222	CHD3;LOC732272	K.M*ETEADAPS#PAPSLGER@.L	0.46	5	N	L	0.95	0.9	0	4.648	1057402	2169891	0.49	0.98	LN5_1E1_LTQ	3781	2	0.98	15.82	-	-	-	M()ETEADAPS(p)PAPSLGER()
IPI00465222	CHD3;LOC732272	K.METEADAPS#PAPS#LGER.L	1.40845	2	N	H	0.73	0.53	1.68807e-06	2.9872	517104	682556	0.76	0.88	HN2_1E1_LTQ	6604	2	0.98	60.14	77.21	-	-	METEADAPS(p)PAPS(p)LGER
IPI00411592	CHD3;LOC732272	K.METEADAPS#PAPS#LGER.L	1.53846	2	N	H	0.86	0.73	4.40083e-09	2.9905	236677	390025	0.61	0.94	HN2_1E1_MSA	5827	2	0.98	48.74	62.35	-	-	METEADAPS(p)PAPS(p)LGER
IPI00465222	CHD3;LOC732272	K.METEADAPS#PAPS#LGER@.L	1.40845	2	N	H	0.73	0.53	1.68807e-06	2.6516	517104	682556	0.76	0.88	HN2_1E1_LTQ	6613	2	0.98	37.81	76.44	-	-	METEADAPS(p)PAPS(p)LGER()
IPI00465222	CHD3;LOC732272	K.METEADAPS#PAPS#LGER.L	0.86	2	N	L	0.78	0.61	2.06229e-09	3.0601	353783	452975	0.78	0.78	LN2_1E1_LTQ	6069	2	0.98	47.56	70.09	-	-	METEADAPS(p)PAPS(p)LGER
IPI00465222	CHD3;LOC732272	K.METEADAPS#PAPS#LGER@.L	0.71	2	N	L	0.73	0.53	8.02551e-05	2.8436	206470	285095	0.72	0.9	LN2_1E1_MSA	5558	2	0.98	48.77	82.9	-	-	METEADAPS(p)PAPS(p)LGER()
IPI00465222	CHD3;LOC732272	K.METEADAPS#PAPS#LGER.L	0.934579	3	N	H	0.85	0.73	9.98436e-09	3.3742	693587	594352	1.17	0.96	HN3_1E1_LTQ	7133	2	0.98	67.4	90.15	-	-	METEADAPS(p)PAPS(p)LGER
IPI00411592	CHD3;LOC732272	K.METEADAPS#PAPS#LGER.L	0.793651	4	N	H	0.58	0.34	0.00168103	3.0607	846739	590249	1.43	0.98	HN4_1E1_MSA	5206	2	0.98	79.19	88.81	-	-	METEADAPS(p)PAPS(p)LGER
IPI00465222	CHD3;LOC732272	K.METEADAPS#PAPS#LGER.L	0.847458	5	N	H	0.68	0.46	2.42613e-05	3.0113	469150	243203	1.93	0.94	HN5_1E1_MSA	3961	2	0.98	46.07	62.9	-	-	METEADAPS(p)PAPS(p)LGER
IPI00411592	CHD3;LOC732272	K.METEADAPS#PAPSLGER.L	2.22222	0	N	H	0.51	0.26	0.000224367	3.6184	766264	793235	0.97	0.88	HN0_1E1_MSA	5231	2	0.98	15.32	-	-	-	METEADAPS(p)PAPSLGER
IPI00465222	CHD3;LOC732272	K.METEADAPS#PAPSLGER@.L	1.88679	2	N	H	0.72	0.52	1.68117e-06	2.9589	861250	1038869	0.83	0.96	HN2_1E1_LTQ	6589	2	0.98	14.21	-	-	-	METEADAPS(p)PAPSLGER()
IPI00465222	CHD3;LOC732272	K.METEADAPS#PAPSLGER@.L	0.9	2	N	L	0.85	0.72	1.72357e-08	3.1555	653451	634060	1.03	0.93	LN2_1E1_MSA	5533	2	0.98	18.25	-	-	-	METEADAPS(p)PAPSLGER()
IPI00465222	CHD3;LOC732272	K.METEADAPS#PAPSLGER@.L	1.03	2	N	L	0.93	0.87	1.11022e-16	3.1173	1006694	1041817	0.97	0.89	LN2_1E1_LTQ	6043	2	0.98	14.66	-	-	-	METEADAPS(p)PAPSLGER()
IPI00465222	CHD3;LOC732272	K.METEADAPS#PAPSLGER@.L	0.52	3	N	L	0.74	0.55	3.37906e-07	3.7303	813085	1265891	0.64	0.96	LN3_1E1_LTQ	6470	2	0.98	18.49	-	-	-	METEADAPS(p)PAPSLGER()
IPI00465222	CHD3;LOC732272	K.METEADAPS#PAPSLGER@.L	0.56	3	N	L	0.82	0.67	3.73052e-07	3.8338	473747	742476	0.64	0.97	LN3_1E1_MSA	5607	2	0.98	19.88	-	-	-	METEADAPS(p)PAPSLGER()
IPI00465222	CHD3;LOC732272	K.METEADAPS#PAPSLGER@.L	0.5	4	N	L	0.78	0.61	1.17351e-06	3.0523	305022	578329	0.53	0.97	LN4_1E1_MSA	5126	2	0.98	17.85	-	-	-	METEADAPS(p)PAPSLGER()
IPI00465222	CHD3;LOC732272	K.METEADAPS#PAPSLGER.L	1.0989	5	N	H	0.29	0.08	0.0440344	3.7626	1156699	466449	2.48	0.83	HN5_1E1_MSA	3897	2	0.98	41.38	-	-	-	METEADAPS(p)PAPSLGER
IPI00792329	CHD4	D.PEEDLS#ETETPK^.L	1.08696	2	N	H	0.95	0.9	6.41709e-14	2.5405	377981	536553	0.7	0.76	HN2_1E1_MSA	4763	2	0.98	12.85	-	-	-	PEEDLS(p)ETETPK()
IPI00792329	CHD4	D.PEEDLS#ETETPK^.L	1.05	3	N	L	0.99	0.97	6.66134e-16	3.0569	759735	881736	0.86	0.94	LN3_1E1_MSA	4596	2	0.98	16.12	-	-	-	PEEDLS(p)ETETPK()
IPI00455210	CHD4	K.EDNS#EGEEILEEVGGDLEEEDDHHM*EF.C	1	3	N	H	1	1	0	3.7204	7815637	7815637	1	0.98	HN3_1E1_LTQ	13979	3	0.98	0	-	-	-	EDNS(p)EGEEILEEVGGDLEEEDDHHM()EF
IPI00455210	CHD4	K.EDNS#EGEEILEEVGGDLEEEDDHHM*EF.C	1	3	N	H	1	1	0	3.442	5089134	5089134	1	0.99	HN3_1E1_MSA	11569	3	0.98	0	-	-	-	EDNS(p)EGEEILEEVGGDLEEEDDHHM()EF
IPI00455210	CHD4	K.EDNS#EGEEILEEVGGDLEEEDDHHM*EF.C	1	4	N	H	1	1	0	3.9797	9430386	9430386	1	0.98	HN4_1E1_LTQ	12969	3	0.98	0	-	-	-	EDNS(p)EGEEILEEVGGDLEEEDDHHM()EF
IPI00455210	CHD4	K.EDNS#EGEEILEEVGGDLEEEDDHHMEF.C	1	4	N	H	1	1	0	3.0558	5233491	5233491	1	0.96	HN4_1E1_LTQ	13257	3	0.98	0	-	-	-	EDNS(p)EGEEILEEVGGDLEEEDDHHMEF
IPI00455210	CHD4	K.IEENS#LKEEESIEGEK.E	1.59	2	N	L	0.94	0.89	1.0914e-11	2.8597	349156	222163	1.57	0.97	LN2_1E1_MSA	5541	2	0.98	41.21	-	-	-	IEENS(p)LKEEESIEGEK
IPI00455210	CHD4	K.IEENS#LKEEESIEGEK.E	1.64	2	N	L	0.96	0.92	0	3.0014	633254	401080	1.58	0.93	LN2_1E1_LTQ	6035	2	0.98	41.43	-	-	-	IEENS(p)LKEEESIEGEK
IPI00455210	CHD4	K.IEENS#LK^EEESIEGEK^.E	0.833333	3	N	H	0.89	0.79	7.63368e-06	3.0211	494559	331158	1.49	0.96	HN3_1E1_MSA	5802	2	0.98	40.43	-	-	-	IEENS(p)LK()EEESIEGEK()
IPI00455210	CHD4	K.IEENS#LKEEESIEGEK.E	1.06	3	N	L	0.95	0.9	0	2.8602	495901	459462	1.08	0.95	LN3_1E1_LTQ	6515	2	0.98	24.96	-	-	-	IEENS(p)LKEEESIEGEK
IPI00792329	CHD4	L.NNSLPPPHPENEEDPEEDLS#ETETPK^.L	1.03093	2	N	H	0.98	0.96	0	4.0023	3126114	3279425	0.95	0.97	HN2_1E1_MSA	6544	3	0.98	4.93	-	-	-	NNSLPPPHPENEEDPEEDLS(p)ETETPK()
IPI00455210	CHD4	L.NNSLPPPHPENEEDPEEDLS#ETETPK^.L	0.657895	3	N	H	0.98	0.96	0	4.1263	16138355	10491275	1.54	0.95	HN3_1E1_LTQ	8209	3	0.98	6.23	-	-	-	NNSLPPPHPENEEDPEEDLS(p)ETETPK()
IPI00455210	CHD4	L.NNSLPPPHPENEEDPEEDLS#ETETPK^.L	0.684932	3	N	H	0.97	0.95	0	3.2668	8040125	5678166	1.42	0.93	HN3_1E1_MSA	6655	3	0.98	7.42	-	-	-	NNSLPPPHPENEEDPEEDLS(p)ETETPK()
IPI00455210	CHD4	L.NNSLPPPHPENEEDPEEDLS#ETETPK^.L	0.86	3	N	L	0.99	0.97	0	3.2589	10392153	11859795	0.88	0.95	LN3_1E1_LTQ	7418	3	0.98	9.42	-	-	-	NNSLPPPHPENEEDPEEDLS(p)ETETPK()
IPI00792329	CHD4	L.NNSLPPPHPENEEDPEEDLS#ETETPK^.L	0.95	3	N	L	0.99	0.99	0	3.6682	5185787	5704566	0.91	0.91	LN3_1E1_MSA	6468	3	0.98	13.2	-	-	-	NNSLPPPHPENEEDPEEDLS(p)ETETPK()
IPI00644723	CHD9	R.VM*S#PENFPTASVEGK.E	1.5601	4	N	H	-1	0	1	2.6327	220353	343772	0.64	0.4	HN4_1E1_MSA	5659	2	0.98	17.65	-	-	-	VM()S(p)PENFPTASVEGK
IPI00010158	CHRAC1	K.R@EEDEENDNDNES#DHDEADS.-	1.19048	2	N	H	0.97	0.94	3.33067e-16	3.0573	587991	633985	0.93	0.99	HN2_1E1_LTQ	3509	3	0.98	36.07	-	-	-	R()EEDEENDNDNES(p)DHDEADS
IPI00010158	CHRAC1	K.R@EEDEENDNDNES#DHDEADS.-	0.826446	3	N	H	0.98	0.96	0	3.1154	512823	399197	1.28	0.99	HN3_1E1_LTQ	4174	2	0.98	29.3	-	-	-	R()EEDEENDNDNES(p)DHDEADS
IPI00010158	CHRAC1	R.EEDEENDNDNES#DHDEADS.-	1	3	N	H	1	1	0	3.0029	765307	765307	1	0.98	HN3_1E1_LTQ	3774	2	0.98	55.46	-	-	-	EEDEENDNDNES(p)DHDEADS
IPI00010158	CHRAC1	R.EEDEENDNDNES#DHDEADS.-	1	5	N	L	1	1	0	2.6113	730189	730189	1	0.96	LN5_1E1_MSA	1532	2	0.98	58.97	-	-	-	EEDEENDNDNES(p)DHDEADS
IPI00921422	CKAP5	R.AVS#PHFDDMHSNTASTI.N	1	3	N	H	1	1	0	2.734	1445231	1489851	0.97	0.96	HN3_1E2_LTQ	5910	2	0.98	29.56	-	-	-	AVS(p)PHFDDMHSNTASTI
IPI00921422	CKAP5	R.AVS#PHFDDMHSNTASTI.N	1.0101	3	N	H	1	1	0	2.5432	1209023	1241870	0.97	0.98	HN3_1E2_MSA	4800	2	0.98	32.52	-	-	-	AVS(p)PHFDDMHSNTASTI
IPI00014625	CLCA1	S.AAHVQS#ELIQINSGSDRDT#LAK.R	0.497512	2	N	H	0.34	0.11	0.0261572	3.3911	566973	51911	10.92	0.93	HN2_1E2_MSA	5677	3	0.98	34.05	4.79	-	-	AAHVQS(p)ELIQINSGSDRDT(p)LAK
IPI00798061	CLN6	R.HGS#VSADEAAR.T	0.671141	0	N	H	0.95	0.9	0	2.6412	538703	410059	1.31	0.97	HN0_1E2_LTQ	1047	2	0.98	17.29	-	-	-	HGS(p)VSADEAAR
IPI00798061	CLN6	R.HGS#VSADEAAR.T	10	0	N	H	0.13	0.02	0.213717	2.7872	521861	1036538	0.5	0.84	HN0_1E1_MSA	2911	2	0.98	24.05	-	-	-	HGS(p)VSADEAAR
IPI00798061	CLN6	R.HGS#VSADEAAR.T	3.125	2	N	H	0.22	0.05	0.0105041	2.8736	1357221	861818	1.57	0.66	HN2_1E1_MSA	2769	2	0.98	17.29	-	-	-	HGS(p)VSADEAAR
IPI00016597	CLN6	R.HGS#VSADEAAR.T	4.7619	2	N	H	0.16	0.02	0.09077	2.6977	1019741	614704	1.66	0.44	HN2_1E1_MSA	2862	2	0.98	26.17	-	-	-	HGS(p)VSADEAAR
IPI00798061	CLN6	R.HGS#VSADEAAR.T	0.58	2	N	L	0.54	0.3	1.63186e-09	2.5403	968906	1000873	0.97	0.58	LN2_1E1_LTQ	2304	2	0.98	33.94	-	-	-	HGS(p)VSADEAAR
IPI00798061	CLN6	R.HGS#VSADEAAR@.T	7.69231	3	N	H	0.2	0.04	0.079832	2.5943	1237335	2726934	0.45	0.43	HN3_1E1_MSA	3223	2	0.98	17.53	-	-	-	HGS(p)VSADEAAR()
IPI00797404	CLN6	R.HGS#VSADEAAR.T	0.57	5	N	L	0.95	0.9	2.55351e-15	2.7477	127839	230530	0.55	0.97	LN5_7E1_MSA	1312	2	0.98	30.39	-	-	-	HGS(p)VSADEAAR
IPI00004795	CLNS1A	K.FEEESK^EPVADEEEEDS#DDDVEPITEFR@.F	1.44928	3	N	H	0.85	0.72	5.84419e-11	3.977	2742658	5311162	0.52	0.89	HN3_1E1_LTQ	10559	3	0.98	23.6	-	-	-	FEEESK()EPVADEEEEDS(p)DDDVEPITEFR()
IPI00004795	CLNS1A	K.FEEESKEPVADEEEEDS#DDDVEPITEFR.F	0.84	3	N	L	0.91	0.83	5.64826e-12	3.8029	1887913	3245928	0.58	0.92	LN3_1E1_LTQ	9642	3	0.98	34.62	-	-	-	FEEESKEPVADEEEEDS(p)DDDVEPITEFR
IPI00004795	CLNS1A	K.FEEESKEPVADEEEEDS#DDDVEPITEFR.F	1.11111	4	N	H	0.95	0.9	0	5.3461	5633266	10929498	0.52	0.92	HN4_1E1_MSA	7736	3	0.98	38.2	-	-	-	FEEESKEPVADEEEEDS(p)DDDVEPITEFR
IPI00004795	CLNS1A	K.FEEESKEPVADEEEEDS#DDDVEPITEFR.F	1.13636	4	N	H	0.91	0.83	0	5.132	7353690	14535870	0.51	0.92	HN4_1E1_LTQ	9799	3	0.98	42.75	-	-	-	FEEESKEPVADEEEEDS(p)DDDVEPITEFR
IPI00748041	CLSPN	R.NFVFHTLS#PVK^.A	0.892857	5	N	H	0.98	0.96	0	2.5155	253551	246781	1.03	0.97	HN5_6E1_LTQ_2	3433	2	0.98	17.12	-	-	-	NFVFHTLS(p)PVK()
IPI00103483	COBRA1	R.K^PS#PAQAAETPALELPLPSVPAPAPL.-	1.44928	0	N	H	0.84	0.71	3.37508e-13	3.204	609542	739774	0.82	0.93	HN0_1E1_LTQ	10049	3	0.98	4.54	-	-	-	K()PS(p)PAQAAETPALELPLPSVPAPAPL
IPI00103483	COBRA1	R.KPS#PAQAAETPALELPLPSVPAPAPL.-	1.16279	0	N	H	0.92	0.85	0	3.1601	1537986	1589667	0.97	0.96	HN0_1E2_MSA	7892	3	0.98	4.47	-	-	-	KPS(p)PAQAAETPALELPLPSVPAPAPL
IPI00103483	COBRA1	R.K^PS#PAQAAETPALELPLPSVPAPAPL.-	1.47059	2	N	H	0.94	0.89	0	3.5213	2297182	3188879	0.72	0.94	HN2_1E1_MSA	10732	3	0.98	2.48	-	-	-	K()PS(p)PAQAAETPALELPLPSVPAPAPL
IPI00103483	COBRA1	R.K^PS#PAQAAETPALELPLPSVPAPAPL.-	1.5625	2	N	H	0.95	0.9	0	3.3986	3602639	5429424	0.66	0.95	HN2_1E1_LTQ	12186	3	0.98	2.7	-	-	-	K()PS(p)PAQAAETPALELPLPSVPAPAPL
IPI00103483	COBRA1	R.KPS#PAQAAETPALELPLPSVPAPAPL.-	1.5625	2	N	H	0.95	0.9	0	3.1771	3602639	5429424	0.66	0.95	HN2_1E1_LTQ	12185	3	0.98	6.52	-	-	-	KPS(p)PAQAAETPALELPLPSVPAPAPL
IPI00103483	COBRA1	R.K^PS#PAQAAETPALELPLPSVPAPAPL.-	0.88	2	N	L	0.95	0.91	0	3.1575	3925061	4085089	0.96	0.97	LN2_1E1_LTQ	11671	3	0.98	5.99	-	-	-	K()PS(p)PAQAAETPALELPLPSVPAPAPL
IPI00103483	COBRA1	R.KPS#PAQAAETPALELPLPSVPAPAPL.-	0.88	2	N	L	0.95	0.91	0	3.4582	3925061	4085089	0.96	0.97	LN2_1E1_LTQ	11659	3	0.98	3.8	-	-	-	KPS(p)PAQAAETPALELPLPSVPAPAPL
IPI00103483	COBRA1	R.KPS#PAQAAETPALELPLPSVPAPAPL.-	0.78125	3	N	H	0.73	0.54	1.61646e-08	2.5148	905982	456502	1.98	0.91	HN3_1E2_MSA	7566	2	0.98	17.29	-	-	-	KPS(p)PAQAAETPALELPLPSVPAPAPL
IPI00103483	COBRA1	R.K^PS#PAQAAETPALELPLPSVPAPAPL.-	0.57	3	N	L	0.95	0.91	0	3.8201	2522497	4304650	0.59	0.94	LN3_1E1_LTQ	12345	3	0.98	3.26	-	-	-	K()PS(p)PAQAAETPALELPLPSVPAPAPL
IPI00103483	COBRA1	R.KPS#PAQAAETPALELPLPSVPAPAPL.-	0.609756	4	N	H	0.8	0.65	1.71196e-13	2.8243	1524467	677545	2.25	0.89	HN4_1E2_MSA	7933	2	0.98	11.6	-	-	-	KPS(p)PAQAAETPALELPLPSVPAPAPL
IPI00006442	COIL	R.LIIES#PSNTSSTEPA.-	1	0	N	H	1	1	0	2.9704	7347944	7398918	0.99	0.99	HN0_1E1_MSA	5802	2	0.98	0	-	-	-	LIIES(p)PSNTSSTEPA
IPI00844306	COL5A2	H.KGLEGPKGEVGAPGS#K.G	0.0181469	2	N	H	-1	0	1	3.0826	2396607	43491	55.11	0.99	HN2_1E5_LTQ	2871	3	0.98	0	-	-	-	KGLEGPKGEVGAPGS(p)K
IPI00966209	COPB2	R.STAQQELDGK^PAS#PTPV.I	0.04	5	N	L	0.07	0	0.369097	2.9557	106678	301217	0.35	0.56	LN5_1E1_MSA	3740	2	0.98	17.29	-	-	-	STAQQELDGK()PAS(p)PTPV
IPI00328317	CPLX4	R.EEY#EEY#QKQMIE.E	16.5248	0	N	H	-1	0	1	2.6765	31471	520051	0.06	0.74	HN0_1E2_MSA	2596	2	0.98	0	-	-	-	EEY(p)EEY(p)QKQMIE
IPI00030654	CPSF6;MIR1279	Y.DDVIS#PSANNGDAPEDR@.D	1.21951	3	N	H	0.87	0.75	1.05714e-10	3.6247	649264	747771	0.87	0.93	HN3_1E1_LTQ	6139	2	0.98	2.49	-	-	-	DDVIS(p)PSANNGDAPEDR()
IPI00647126	CPSF6;MIR1279	Y.DDVIS#PSANNGDAPEDR.D	1.21	3	N	L	0.98	0.95	2.62901e-13	2.5435	286852	256294	1.12	0.97	LN3_1E1_MSA	4955	2	0.98	9.32	-	-	-	DDVIS(p)PSANNGDAPEDR
IPI00647126	CPSF6;MIR1279	Y.DDVIS#PSANNGDAPEDR@.D	0.43	4	N	L	0.96	0.92	0	3.8791	420747	987245	0.43	0.96	LN4_1E1_LTQ	5238	2	0.98	23.41	-	-	-	DDVIS(p)PSANNGDAPEDR()
IPI00647126	CPSF6;MIR1279	Y.DDVIS#PSANNGDAPEDR@.D	0.46	4	N	L	0.98	0.95	2.33147e-15	3.7891	229920	506593	0.45	0.99	LN4_1E1_MSA	4402	2	0.98	16.08	-	-	-	DDVIS(p)PSANNGDAPEDR()
IPI00012998	CPSF6;MIR1279	Y.DDVIS#PSANNGDAPEDR@.D	0.46	4	N	L	0.98	0.95	2.33147e-15	3.6617	229920	506593	0.45	0.99	LN4_1E1_MSA	4457	2	0.98	17.63	-	-	-	DDVIS(p)PSANNGDAPEDR()
IPI00647126	CPSF6;MIR1279	Y.DDVIS#PSANNGDAPEDR.D	0.471698	5	N	H	0.92	0.84	5.55112e-16	3.7005	1297247	463530	2.8	0.95	HN5_1E1_LTQ	3559	2	0.98	17.89	-	-	-	DDVIS(p)PSANNGDAPEDR
IPI00433048	CREB1	K.ILNDLS#SDAPGVPR.I	0.662252	0	N	H	0.97	0.94	0	3.0441	2272460	1578130	1.44	0.97	HN0_1E1_LTQ	7439	2	0.98	5.88	-	-	-	ILNDLS(p)SDAPGVPR
IPI00433048	CREB1	K.ILNDLS#SDAPGVPR.I	1.11111	0	N	H	0.59	0.34	4.33628e-05	2.6751	298777	323944	0.92	0.65	HN0_1E2_LTQ	5161	2	0.98	7.68	-	-	-	ILNDLS(p)SDAPGVPR
IPI00433048	CREB1	K.ILNDLS#SDAPGVPR@.I	0.662252	0	N	H	0.97	0.94	0	2.6629	2272460	1578130	1.44	0.97	HN0_1E1_LTQ	7469	2	0.98	8.4	-	-	-	ILNDLS(p)SDAPGVPR()
IPI00433048	CREB1	K.ILNDLS#SDAPGVPR.I	0.52356	2	N	H	0.99	0.99	0	2.543	8526516	5453138	1.56	0.99	HN2_1E1_LTQ	8408	2	0.98	1.85	-	-	-	ILNDLS(p)SDAPGVPR
IPI00433048	CREB1	K.ILNDLS#SDAPGVPR.I	0.81	2	N	L	0.98	0.97	0	2.8641	2647551	3643589	0.73	0.96	LN2_1E1_LTQ	7960	2	0.98	0.48	-	-	-	ILNDLS(p)SDAPGVPR
IPI00433048	CREB1	K.ILNDLS#SDAPGVPR.I	0.75188	3	N	H	0.66	0.44	4.90522e-06	2.6383	472392	460370	1.03	0.97	HN3_1E2_LTQ	6311	2	0.98	6.75	-	-	-	ILNDLS(p)SDAPGVPR
IPI00218334	CREB1	K.ILNDLS#SDAPGVPR.I	0.228311	4	N	H	0.93	0.87	0	3.3856	8826029	2585775	3.41	0.93	HN4_1E1_LTQ	8739	2	0.98	7.53	-	-	-	ILNDLS(p)SDAPGVPR
IPI00433048	CREB1	K.ILNDLS#SDAPGVPR.I	0.248756	4	N	H	0.94	0.89	0	3.2803	7685917	2211421	3.48	0.99	HN4_1E1_MSA	6696	2	0.98	7.3	-	-	-	ILNDLS(p)SDAPGVPR
IPI00433048	CREB1	K.ILNDLS#SDAPGVPR.I	0.154799	5	N	H	0.7	0.49	6.60129e-08	3.0009	5662027	900583	6.29	0.94	HN5_1E1_LTQ	5876	2	0.98	5.88	-	-	-	ILNDLS(p)SDAPGVPR
IPI00433048	CREB1	K.ILNDLS#SDAPGVPR@.I	0.17	5	N	L	0.96	0.92	0	2.6395	703837	4368608	0.16	0.96	LN5_1E1_LTQ	5843	2	0.98	1	-	-	-	ILNDLS(p)SDAPGVPR()
IPI00218334	CREB1	K.ILNDLS#SDAPGVPR@.I	0.19	5	N	L	0.94	0.88	0	2.5849	140451	823647	0.17	0.97	LN5_2E1_LTQ	3353	2	0.98	5.88	-	-	-	ILNDLS(p)SDAPGVPR()
IPI00218334	CREB1	R.IEEEKS#EEETSAPAITTV.T	1.55	3	N	L	0.93	0.86	2.36589e-13	2.7378	1218307	890121	1.37	0.98	LN3_1E1_LTQ	7483	2	0.98	43.82	-	-	-	IEEEKS(p)EEETSAPAITTV
IPI00924733	CREB1	R.TAPTSTIAPGVVM*ASS#PALPTQPAEEAAR.K	0.952381	0	N	H	0.86	0.74	1.23568e-12	3.0452	1437355	1058831	1.36	0.95	HN0_1E1_MSA	6644	3	0.98	5.29	-	-	-	TAPTSTIAPGVVM()ASS(p)PALPTQPAEEAAR
IPI00847524	CREB3L3	I.SPFGPNK^T#ESPGDFAPVR@.V	100	0	N	H	0.15	0.02	0.242179	2.6047	3728	213596	0.02	0.89	HN0_1E4_LTQ	3195	2	0.98	11.36	-	-	-	SPFGPNK()T(p)ESPGDFAPVR()
IPI00032164	CSRP3	R.CAICGKS#LESTNVTDKDGELYCKVCY#AK.N	2.63158	4	N	H	0.13	0.02	0.0605364	3.6786	14211431	1054080	13.48	0.1	HN4_1E1_MSA	9111	3	0.98	11.14	1.13	-	-	C()AIC()GKS(p)LESTNVTDKDGELYC()KVC()Y(p)AK
IPI00015195	CSTF3	K.R@PNEDS#DEDEEK^.G	1.11111	0	N	H	0.77	0.6	1.11655e-12	3.1821	1578957	1162546	1.36	0.68	HN0_1E1_MSA	1252	2	0.98	0	-	-	-	R()PNEDS(p)DEDEEK()
IPI00015195	CSTF3	K.RPNEDS#DEDEEK.G	0.892857	0	N	H	0.87	0.76	1.55431e-15	2.6147	895208	654027	1.37	0.71	HN0_1E1_LTQ	1144	2	0.98	0	-	-	-	RPNEDS(p)DEDEEK
IPI00015195	CSTF3	K.RPNEDS#DEDEEK.G	1.11111	0	N	H	0.77	0.6	1.11655e-12	2.9024	1578957	1162546	1.36	0.68	HN0_1E1_MSA	1174	2	0.98	0	-	-	-	RPNEDS(p)DEDEEK
IPI00015195	CSTF3	K.R@PNEDS#DEDEEK^.G	2	2	N	H	0.53	0.29	8.96424e-06	2.627	624169	611874	1.02	0.64	HN2_1E1_MSA	1120	2	0.98	0	-	-	-	R()PNEDS(p)DEDEEK()
IPI00015195	CSTF3	K.R@PNEDS#DEDEEK^.G	0.561798	3	N	H	0.94	0.88	3.64708e-13	2.8852	1804659	1030721	1.75	0.89	HN3_1E1_LTQ	1510	2	0.98	0	-	-	-	R()PNEDS(p)DEDEEK()
IPI00015195	CSTF3	K.R@PNEDS#DEDEEK^.G	0.657895	3	N	H	0.84	0.7	0	2.9244	2415399	1314405	1.84	0.91	HN3_1E1_MSA	985	2	0.98	0	-	-	-	R()PNEDS(p)DEDEEK()
IPI00015195	CSTF3	K.RPNEDS#DEDEEK.G	0.578035	3	N	H	0.92	0.85	0	2.9991	3506836	1994819	1.76	0.59	HN3_1E1_LTQ	1466	2	0.98	0	-	-	-	RPNEDS(p)DEDEEK
IPI00015195	CSTF3	K.RPNEDS#DEDEEK.G	0.653595	3	N	H	0.85	0.71	0	3.26	2208318	1194210	1.85	0.87	HN3_1E1_MSA	1095	2	0.98	0	-	-	-	RPNEDS(p)DEDEEK
IPI00015195	CSTF3	K.RPNEDS#DEDEEK.G	0.369004	4	N	H	0.9	0.82	6.22282e-09	3.2894	569521	258990	2.2	0.96	HN4_1E1_MSA	279	2	0.98	0	-	-	-	RPNEDS(p)DEDEEK
IPI00015195	CSTF3	K.RPNEDS#DEDEEK.G	0.4	4	N	H	0.79	0.63	6.46623e-09	3.2017	1938313	826239	2.35	0.94	HN4_1E1_LTQ	602	2	0.98	0	-	-	-	RPNEDS(p)DEDEEK
IPI00015195	CSTF3	K.R@PNEDS#DEDEEK^.G	0.22	4	N	L	0.31	0.1	0.00281567	2.5867	294655	746578	0.39	0.53	LN4_1E1_LTQ	1030	2	0.98	0	-	-	-	R()PNEDS(p)DEDEEK()
IPI00015195	CSTF3	K.R@PNEDS#DEDEEK^.G	0.26	4	N	L	0.49	0.24	3.25774e-06	2.6094	317381	835058	0.38	0.63	LN4_1E1_MSA	919	2	0.98	0	-	-	-	R()PNEDS(p)DEDEEK()
IPI00015195	CSTF3	K.RPNEDS#DEDEEKGAVVPPVHDIYR.A	0.416667	5	N	H	0.93	0.87	0	3.5066	967819	360743	2.68	0.97	HN5_9E1_LTQ	4341	3	0.98	51.46	-	-	-	RPNEDS(p)DEDEEKGAVVPPVHDIYR
IPI00477468	CTR9	K.GEEGS#DDDETENGPKPK.K	0.787402	0	N	H	0.99	0.99	0	3.0503	1007271	800900	1.26	0.97	HN0_1E1_LTQ	2990	2	0.98	48.18	-	-	-	GEEGS(p)DDDETENGPKPK
IPI00477468	CTR9	K.GEEGS#DDDETENGPKPK.K	0.787402	0	N	H	0.99	0.99	0	2.8855	495745	393074	1.26	0.96	HN0_1E1_MSA	3106	2	0.98	33.11	-	-	-	GEEGS(p)DDDETENGPKPK
IPI00477468	CTR9	K.GEEGS#DDDETENGPKPK.K	0.833333	2	N	H	0.98	0.96	0	3.5665	735971	648329	1.14	0.99	HN2_1E1_MSA	3498	2	0.98	53.18	-	-	-	GEEGS(p)DDDETENGPKPK
IPI00477468	CTR9	K.GEEGS#DDDETENGPKPK.K	0.961538	2	N	H	0.98	0.97	0	2.7893	958308	920241	1.04	0.98	HN2_1E1_LTQ	3445	2	0.98	48	-	-	-	GEEGS(p)DDDETENGPKPK
IPI00477468	CTR9	K.GEEGS#DDDETENGPK^PK^.K	0.487805	3	N	H	0.99	0.98	0	2.8396	1759607	848836	2.07	0.99	HN3_1E1_MSA	3391	2	0.98	45.38	-	-	-	GEEGS(p)DDDETENGPK()PK()
IPI00477468	CTR9	K.GEEGS#DDDETENGPKPK.K	0.487805	3	N	H	0.99	0.98	0	2.7328	1759607	848836	2.07	0.99	HN3_1E1_MSA	3400	2	0.98	40.15	-	-	-	GEEGS(p)DDDETENGPKPK
IPI00477468	CTR9	K.GEEGS#DDDETENGPKPK.K	0.64	3	N	L	0.99	0.97	0	2.6876	474052	737103	0.64	0.95	LN3_1E1_LTQ	3743	2	0.98	22.85	-	-	-	GEEGS(p)DDDETENGPKPK
IPI00477468	CTR9	K.GEEGS#DDDETENGPK^PK^.K	0.33	4	N	L	0.99	0.98	0	3.1372	319640	921965	0.35	0.99	LN4_1E1_MSA	2980	2	0.98	58.16	-	-	-	GEEGS(p)DDDETENGPK()PK()
IPI00477468	CTR9	K.GEEGS#DDDETENGPKPK.K	0.3	4	N	L	0.98	0.96	0	2.677	511421	1567939	0.33	0.99	LN4_1E1_LTQ	3243	2	0.98	32.76	-	-	-	GEEGS(p)DDDETENGPKPK
IPI00477468	CTR9	K.GEEGS#DDDETENGPKPK.K	0.33	4	N	L	0.99	0.98	0	2.6044	319640	921965	0.35	0.99	LN4_1E1_MSA	2951	2	0.98	20.59	-	-	-	GEEGS(p)DDDETENGPKPK
IPI00477468	CTR9	K.GGEFDEFVNDDT#DDDLPISK^.K	1.1	2	N	L	0.93	0.87	0	4.5206	3337505	3823204	0.87	0.91	LN2_1E1_LTQ	10213	2	0.98	46.44	-	-	-	GGEFDEFVNDDT(p)DDDLPISK()
IPI00477468	CTR9	K.GGEFDEFVNDDT#DDDLPISK^.K	1.2	2	N	L	0.97	0.94	0	4.2929	3417823	3426999	1	0.96	LN2_1E1_MSA	9269	2	0.98	66.53	-	-	-	GGEFDEFVNDDT(p)DDDLPISK()
IPI00477468	CTR9	K.K^GGEFDEFVNDDT#DDDLPISK^.K	0.990099	2	N	H	0.95	0.9	0	3.9104	2651290	2695751	0.98	0.98	HN2_1E1_LTQ	10164	3	0.98	23.12	-	-	-	K()GGEFDEFVNDDT(p)DDDLPISK()
IPI00477468	CTR9	K.KGGEFDEFVNDDT#DDDLPISK.K	0.990099	2	N	H	0.95	0.9	0	3.2211	2651290	2695751	0.98	0.98	HN2_1E1_LTQ	10152	3	0.98	32.66	-	-	-	KGGEFDEFVNDDT(p)DDDLPISK
IPI00477468	CTR9	K.KGGEFDEFVNDDT#DDDLPISK.K	1.04167	2	N	H	0.94	0.89	0	3.0496	1583887	1749973	0.91	0.97	HN2_1E1_MSA	8885	3	0.98	45.23	-	-	-	KGGEFDEFVNDDT(p)DDDLPISK
IPI00477468	CTR9	K.K^GGEFDEFVNDDT#DDDLPISK^.K	0.85	2	N	L	0.88	0.77	1.43282e-09	2.5985	1025911	1072856	0.96	0.93	LN2_1E1_MSA	8758	2	0.98	59.71	-	-	-	K()GGEFDEFVNDDT(p)DDDLPISK()
IPI00477468	CTR9	K.K^GGEFDEFVNDDT#DDDLPISK^.K	0.96	2	N	L	0.87	0.75	1.4847e-12	2.5648	1391331	1354046	1.03	0.95	LN2_1E1_LTQ	9647	2	0.98	15.86	-	-	-	K()GGEFDEFVNDDT(p)DDDLPISK()
IPI00477468	CTR9	K.K^GGEFDEFVNDDT#DDDLPISK^.K	1.13	2	N	L	0.94	0.88	0	4.0922	2036151	1705828	1.19	0.97	LN2_1E1_MSA	8725	3	0.98	77.76	-	-	-	K()GGEFDEFVNDDT(p)DDDLPISK()
IPI00477468	CTR9	K.K^GGEFDEFVNDDT#DDDLPISK^.K	0.534759	3	N	H	0.95	0.91	0	3.4689	4409215	2454148	1.8	0.97	HN3_1E1_LTQ	11178	3	0.98	44.43	-	-	-	K()GGEFDEFVNDDT(p)DDDLPISK()
IPI00477468	CTR9	K.KGGEFDEFVNDDT#DDDLPISK.K	0.534759	3	N	H	0.95	0.91	0	3.3958	4409215	2454148	1.8	0.97	HN3_1E1_LTQ	11186	3	0.98	59.91	-	-	-	KGGEFDEFVNDDT(p)DDDLPISK
IPI00477468	CTR9	K.K^GGEFDEFVNDDT#DDDLPISK^.K	0.54	3	N	L	0.95	0.91	0	3.7802	1803336	3070493	0.59	0.97	LN3_1E1_MSA	8789	3	0.98	60.73	-	-	-	K()GGEFDEFVNDDT(p)DDDLPISK()
IPI00477468	CTR9	K.K^GGEFDEFVNDDT#DDDLPISK^.K	0.64	3	N	L	0.9	0.81	5.44009e-15	2.9098	865121	1567581	0.55	0.94	LN3_1E1_MSA	8822	2	0.98	29.94	-	-	-	K()GGEFDEFVNDDT(p)DDDLPISK()
IPI00477468	CTR9	K.KGGEFDEFVNDDT#DDDLPISK.K	0.31348	4	N	H	0.92	0.84	0	3.406	5679020	1832288	3.1	0.97	HN4_1E1_MSA	8271	3	0.98	50.2	-	-	-	KGGEFDEFVNDDT(p)DDDLPISK
IPI00477468	CTR9	K.KGGEFDEFVNDDT#DDDLPISK.K	0.35461	4	N	H	0.92	0.84	0	4.6551	4451959	1761681	2.53	0.98	HN4_1E1_MSA	8311	2	0.98	60.6	-	-	-	KGGEFDEFVNDDT(p)DDDLPISK
IPI00477468	CTR9	K.KGGEFDEFVNDDT#DDDLPISK.K	0.362319	4	N	H	0.93	0.86	0	3.4237	5740701	1936965	2.96	0.97	HN4_1E1_LTQ	10501	3	0.98	39.8	-	-	-	KGGEFDEFVNDDT(p)DDDLPISK
IPI00477468	CTR9	K.KGGEFDEFVNDDT#DDDLPISK.K	0.393701	4	N	H	0.92	0.84	2.65676e-13	3.8254	6992109	2561941	2.73	0.76	HN4_1E1_LTQ	10452	2	0.98	87.62	-	-	-	KGGEFDEFVNDDT(p)DDDLPISK
IPI00477468	CTR9	K.K^GGEFDEFVNDDT#DDDLPISK^.K	0.32	4	N	L	0.91	0.82	0	3.3811	845614	2464780	0.34	0.96	LN4_1E1_LTQ	9362	3	0.98	40.84	-	-	-	K()GGEFDEFVNDDT(p)DDDLPISK()
IPI00477468	CTR9	K.K^GGEFDEFVNDDT#DDDLPISK^.K	0.34	4	N	L	0.95	0.9	0	3.5254	771884	2287050	0.34	0.97	LN4_1E1_MSA	8051	3	0.98	50.86	-	-	-	K()GGEFDEFVNDDT(p)DDDLPISK()
IPI00477468	CTR9	K.KGGEFDEFVNDDT#DDDLPISK.K	0.32	4	N	L	0.91	0.82	0	3.0322	845614	2464780	0.34	0.96	LN4_1E1_LTQ	9384	3	0.98	27.92	-	-	-	KGGEFDEFVNDDT(p)DDDLPISK
IPI00382459	CUL3	R.QLTLQHHM*GS#ADLNAT#FY#GPVKKEDGSEV.G	0.0434216	4	N	H	0.62	0.38	1.28304e-07	3.399	43450931	1764508	24.62	0.56	HN4_1E1_MSA	6888	3	0.98	2.16	3.62	0.16	-	QLTLQHHM()GS(p)ADLNAT(p)FY(p)GPVKKEDGSEV
IPI00419894	CUX1	R.EEVPRPAEQTEPPPSGT#PGPDDAR.D	3.18522	2	N	H	-1	0	1	4.2084	937998	2987732	0.31	0.58	HN2_1E1_LTQ	5952	3	0.98	0.19	-	-	-	EEVPRPAEQTEPPPSGT(p)PGPDDAR
IPI00419894	CUX1	R.EEVPRPAEQTEPPPSGT#PGPDDAR.D	2.36	4	N	H	-1	0	1	3.6692	1996117	4710828	0.42	0.56	HN4_1E1_LTQ	6216	3	0.98	7.54	-	-	-	EEVPRPAEQTEPPPSGT(p)PGPDDAR
IPI00419894	CUX1	R.RPS#SLQSLFGLPEAAGAR.D	0.558659	2	N	H	0.76	0.58	4.49529e-07	2.9183	895534	294983	3.04	0.9	HN2_1E1_MSA	9900	2	0.98	8.95	-	-	-	RPS(p)SLQSLFGLPEAAGAR
IPI00946212	DCP1A	R.VAAS#ASLSNMVLAPLQSM*QQNQ.D	1.08696	5	N	H	0.98	0.96	0	3.1734	2860213	3186740	0.9	0.9	HN5_1E1_MSA	3846	3	0.98	-0.29	-	-	-	VAASAS(p)LSNMVLAPLQSM()QQNQ
IPI00549348	DDB2	R.SRS#PLELEPEAK.K	0.315457	4	N	H	0.99	0.97	0	2.7398	1610608	562200	2.86	0.99	HN4_1E1_MSA	4935	2	0.98	10.34	-	-	-	SRS(p)PLELEPEAK
IPI00446284	DDB2	R.SR@S#PLELEPEAK^.K	0.45	4	N	L	0.97	0.94	1.02141e-14	2.6094	266966	562132	0.47	0.97	LN4_1E1_MSA	4867	2	0.98	0.18	-	-	-	SR()S(p)PLELEPEAK()
IPI00549348	DDB2	R.SR@S#PLELEPEAK^.K	0.47	4	N	L	0.98	0.97	0	2.7276	383601	781720	0.49	0.98	LN4_1E1_LTQ	5683	2	0.98	9.85	-	-	-	SR()S(p)PLELEPEAK()
IPI00549348	DDB2	R.SRS#PLELEPEAK.K	0.45	4	N	L	0.92	0.85	2.35756e-12	3.2477	219978	462558	0.48	0.96	LN4_1E1_LTQ	5694	3	0.98	0	-	-	-	S(p)RSPLELEPEAK
IPI00015953	DDX21	K.K^AEPSEVDM*NS#PK^.S	1.88679	2	N	H	0.84	0.7	1.47375e-07	2.7742	100379	200640	0.5	0.77	HN2_1E1_MSA	3606	2	0.98	25.81	-	-	-	K()AEPSEVDM()NS(p)PK()
IPI00015953	DDX21	K.KAEPSEVDM*NS#PK.S	1.38	2	N	L	0.87	0.75	2.70878e-08	2.6964	214563	181057	1.19	0.99	LN2_1E1_LTQ	3507	2	0.98	22.73	-	-	-	KAEPSEVDM()NS(p)PK
IPI00015953	DDX21	K.K^AEPSEVDMNS#PK^.S	20	3	N	H	0.23	0.05	0.200719	2.8133	169462	1105069	0.15	0.87	HN3_1E1_MSA	4327	2	0.98	39.87	-	-	-	K()AEPSEVDMNS(p)PK()
IPI00477179	DDX21	K.K^EEPSQNDIS#PK^.T	1.42857	2	N	H	0.98	0.96	0	2.9021	563957	852984	0.66	0.95	HN2_1E1_LTQ	4039	2	0.98	35.11	-	-	-	K()EEPSQNDIS(p)PK()
IPI00477179	DDX21	K.KEEPSQNDIS#PK.T	1.38889	2	N	H	0.9	0.81	4.78712e-08	2.6445	220679	298403	0.74	0.8	HN2_1E1_MSA	4005	2	0.98	29	-	-	-	KEEPSQNDIS(p)PK
IPI00477179	DDX21	K.K^EEPSQNDIS#PK^.T	1.20482	3	N	H	0.95	0.9	5.98736e-11	2.613	367788	485342	0.76	0.71	HN3_1E1_MSA	3966	2	0.98	48.82	-	-	-	K()EEPSQNDIS(p)PK()
IPI00477179	DDX21	K.KEEPSQNDIS#PK.T	0.404858	4	N	H	0.9	0.8	0	2.6948	2431121	1027151	2.37	0.96	HN4_1E1_LTQ	2834	2	0.98	38.21	-	-	-	KEEPSQNDIS(p)PK
IPI00477179	DDX21	K.KEEPSQNDIS#PK.T	0.625	4	N	H	0.39	0.15	0.0320124	2.8424	698712	283370	2.47	0.74	HN4_1E1_MSA	748	2	0.98	32.18	-	-	-	KEEPSQNDIS(p)PK
IPI00477179	DDX21	K.KEEPSQNDIS#PK.T	0.680272	5	N	H	0.74	0.54	1.14448e-05	3.007	160765	105266	1.53	0.79	HN5_8E1_MSA	1737	2	0.98	46.43	-	-	-	KEEPSQNDIS(p)PK
IPI00015953	DDX21	K.K^K^AEPSEVDM*NS#PK^.S	1.72414	5	N	H	0.91	0.82	3.90059e-10	3.5819	141491	265769	0.53	0.95	HN5_9E1_MSA	1695	3	0.98	79.45	-	-	-	K()K()AEPSEVDM()NS(p)PK()
IPI00015953	DDX21	K.K^K^AEPSEVDM*NS#PK^.S	2.22222	5	N	H	0.9	0.81	1.76525e-14	3.0045	267001	556139	0.48	0.96	HN5_9E1_LTQ	1832	3	0.98	61.4	-	-	-	K()K()AEPSEVDM()NS(p)PK()
IPI00477179	DDX21	K.KKEEPSQNDIS#PK.T	0.714286	0	N	H	0.99	0.98	0	2.5287	811139	618076	1.31	0.97	HN0_1E1_LTQ	3524	2	0.98	21.62	-	-	-	KKEEPSQNDIS(p)PK
IPI00477179	DDX21	K.KKEEPSQNDIS#PK.T	0.746269	0	N	H	0.98	0.96	4.17111e-13	3.0548	561187	416746	1.35	0.97	HN0_1E1_MSA	3466	2	0.98	39	-	-	-	KKEEPSQNDIS(p)PK
IPI00477179	DDX21	K.KKEEPSQNDIS#PK.T	0.833333	2	N	H	0.96	0.93	1.84519e-13	2.8012	1025030	890650	1.15	0.94	HN2_1E1_LTQ	4238	2	0.98	35.34	-	-	-	KKEEPSQNDIS(p)PK
IPI00477179	DDX21	K.KKEEPSQNDIS#PK.T	1.51	2	N	L	0.98	0.96	0	2.7325	466758	309167	1.51	0.99	LN2_1E1_MSA	3996	2	0.98	30.49	-	-	-	KKEEPSQNDIS(p)PK
IPI00477179	DDX21	K.KKEEPSQNDIS#PK.T	1.88	2	N	L	0.97	0.94	8.61533e-14	2.9234	753844	406811	1.85	0.97	LN2_1E1_LTQ	4158	2	0.98	41.98	-	-	-	KKEEPSQNDIS(p)PK
IPI00477179	DDX21	K.KKEEPSQNDIS#PK.T	0.746269	3	N	H	0.97	0.94	0	2.9267	2772553	2146515	1.29	0.98	HN3_1E1_LTQ	4852	2	0.98	37.12	-	-	-	KKEEPSQNDIS(p)PK
IPI00477179	DDX21	K.KKEEPSQNDIS#PK.T	0.787402	3	N	H	1	0.99	0	2.8057	1780905	1456536	1.22	0.99	HN3_1E1_MSA	4148	2	0.98	31.84	-	-	-	KKEEPSQNDIS(p)PK
IPI00477179	DDX21	K.KKEEPSQNDIS#PK.T	1.33	3	N	L	0.99	0.98	2.22045e-16	2.7641	793715	574945	1.38	0.98	LN3_1E1_MSA	4175	2	0.98	28.27	-	-	-	KKEEPSQNDIS(p)PK
IPI00015953	DDX21	K.KKEEPSQNDIS#PK.T	1.33	3	N	L	0.99	0.98	2.22045e-16	2.7641	793715	574945	1.38	0.98	LN3_1E1_MSA	4175	2	0.98	28.27	-	-	-	KKEEPSQNDIS(p)PK
IPI00477179	DDX21	K.KKEEPSQNDIS#PK.T	1.35	3	N	L	0.98	0.96	0	3.3298	1224227	896582	1.37	0.97	LN3_1E1_LTQ	4609	2	0.98	30.6	-	-	-	KKEEPSQNDIS(p)PK
IPI00015953	DDX21	K.KKEEPSQNDIS#PK.T	0.273973	4	N	H	0.98	0.96	1.11022e-16	2.8465	5815111	1898357	3.06	0.98	HN4_1E1_LTQ	5091	2	0.98	36.95	-	-	-	KKEEPSQNDIS(p)PK
IPI00477179	DDX21	K.KKEEPSQNDIS#PK.T	0.273973	4	N	H	0.98	0.96	1.11022e-16	3.1505	5815111	1898357	3.06	0.98	HN4_1E1_LTQ	5157	2	0.98	41.73	-	-	-	KKEEPSQNDIS(p)PK
IPI00015953	DDX21	K.KKEEPSQNDIS#PK.T	0.275482	4	N	H	0.99	0.98	0	3.1143	2606354	730911	3.57	1	HN4_1E1_MSA	1241	2	0.98	45.13	-	-	-	KKEEPSQNDIS(p)PK
IPI00477179	DDX21	K.KKEEPSQNDIS#PK.T	0.275482	4	N	H	0.99	0.98	0	3.1564	2606354	730911	3.57	1	HN4_1E1_MSA	1302	2	0.98	34.84	-	-	-	KKEEPSQNDIS(p)PK
IPI00477179	DDX21	K.K^K^EEPSQNDIS#PK^.T	0.42	4	N	L	0.98	0.95	3.33067e-16	2.6533	242057	571532	0.42	0.97	LN4_1E1_LTQ	4069	2	0.98	41.87	-	-	-	K()K()EEPSQNDIS(p)PK()
IPI00477179	DDX21	K.K^K^EEPSQNDIS#PK^.T	0.534759	5	N	H	1	1	0	3.0129	7437058	3969981	1.87	0.93	HN5_9E1_MSA	1933	2	0.98	37.35	-	-	-	K()K()EEPSQNDIS(p)PK()
IPI00477179	DDX21	K.K^K^EEPSQNDIS#PK^.T	0.552486	5	N	H	1	0.99	0	3.2515	9820094	5259830	1.87	0.97	HN5_9E1_LTQ	2175	2	0.98	33.75	-	-	-	K()K()EEPSQNDIS(p)PK()
IPI00015953	DDX21	K.KKEEPSQNDIS#PK.T	0.534759	5	N	H	1	1	0	3.0782	7437058	3969981	1.87	0.93	HN5_9E1_MSA	1873	2	0.98	35.32	-	-	-	KKEEPSQNDIS(p)PK
IPI00477179	DDX21	K.KKEEPSQNDIS#PK.T	0.534759	5	N	H	1	1	0	3.3221	7437058	3969981	1.87	0.93	HN5_9E1_MSA	1931	2	0.98	39.29	-	-	-	KKEEPSQNDIS(p)PK
IPI00477179	DDX21	K.KKEEPSQNDIS#PK.T	0.552486	5	N	H	1	0.99	0	2.8513	9820094	5259830	1.87	0.97	HN5_9E1_LTQ	2161	2	0.98	28.41	-	-	-	KKEEPSQNDIS(p)PK
IPI00477179	DDX21	K.NEEPS#EEEIDAPK^PK^.K	0.78125	0	N	H	1	1	0	3.4582	12776081	9818271	1.3	0.96	HN0_1E1_LTQ	4695	2	0.98	0	-	-	-	NEEPS(p)EEEIDAPK()PK()
IPI00015953	DDX21	K.NEEPS#EEEIDAPK^PK^.K	0.787402	0	N	H	1	0.99	0	3.8417	13670653	10680333	1.28	0.96	HN0_1E1_MSA	4286	2	0.98	0	-	-	-	NEEPS(p)EEEIDAPK()PK()
IPI00477179	DDX21	K.NEEPS#EEEIDAPK^PK^.K	0.787402	0	N	H	1	0.99	0	4.0816	13670653	10680333	1.28	0.96	HN0_1E1_MSA	4403	2	0.98	0	-	-	-	NEEPS(p)EEEIDAPK()PK()
IPI00477179	DDX21	K.NEEPS#EEEIDAPKPK.K	0.78125	0	N	H	1	1	0	3.6402	12776081	9818271	1.3	0.96	HN0_1E1_LTQ	4774	2	0.98	0	-	-	-	NEEPS(p)EEEIDAPKPK
IPI00477179	DDX21	K.NEEPS#EEEIDAPKPK.K	0.787402	0	N	H	1	0.99	0	3.9711	13670653	10680333	1.28	0.96	HN0_1E1_MSA	4282	2	0.98	0	-	-	-	NEEPS(p)EEEIDAPKPK
IPI00015953	DDX21	K.NEEPS#EEEIDAPKPK.K	0.787402	0	N	H	1	0.99	0	3.9711	13670653	10680333	1.28	0.96	HN0_1E1_MSA	4282	2	0.98	0	-	-	-	NEEPS(p)EEEIDAPKPK
IPI00477179	DDX21	K.NEEPS#EEEIDAPK^PK^.K	1.11111	2	N	H	1	1	0	3.5049	20399467	23177383	0.88	0.99	HN2_1E1_LTQ	5256	2	0.98	0	-	-	-	NEEPS(p)EEEIDAPK()PK()
IPI00015953	DDX21	K.NEEPS#EEEIDAPK^PK^.K	1.11111	2	N	H	1	1	0	3.2531	20399467	23177383	0.88	0.99	HN2_1E1_LTQ	5357	2	0.98	0	-	-	-	NEEPS(p)EEEIDAPK()PK()
IPI00477179	DDX21	K.NEEPS#EEEIDAPK^PK^.K	1.17647	2	N	H	1	0.99	0	3.3568	6601801	7665204	0.86	0.99	HN2_1E1_MSA	4867	2	0.98	0	-	-	-	NEEPS(p)EEEIDAPK()PK()
IPI00015953	DDX21	K.NEEPS#EEEIDAPKPK.K	1.11111	2	N	H	1	1	0	3.1374	20399467	23177383	0.88	0.99	HN2_1E1_LTQ	5257	2	0.98	0	-	-	-	NEEPS(p)EEEIDAPKPK
IPI00477179	DDX21	K.NEEPS#EEEIDAPKPK.K	1.11111	2	N	H	1	1	0	3.6637	20399467	23177383	0.88	0.99	HN2_1E1_LTQ	5334	2	0.98	0	-	-	-	NEEPS(p)EEEIDAPKPK
IPI00477179	DDX21	K.NEEPS#EEEIDAPKPK.K	1.17647	2	N	H	1	0.99	0	3.8216	6601801	7665204	0.86	0.99	HN2_1E1_MSA	4868	2	0.98	0	-	-	-	NEEPS(p)EEEIDAPKPK
IPI00015953	DDX21	K.NEEPS#EEEIDAPKPK.K	1.17647	2	N	H	1	0.99	0	3.8216	6601801	7665204	0.86	0.99	HN2_1E1_MSA	4868	2	0.98	0	-	-	-	NEEPS(p)EEEIDAPKPK
IPI00477179	DDX21	K.NEEPS#EEEIDAPK^PK^.K	1.6	2	N	L	1	0.99	0	3.7429	14493186	9026237	1.61	0.99	LN2_1E1_LTQ	4864	2	0.98	0	-	-	-	NEEPS(p)EEEIDAPK()PK()
IPI00015953	DDX21	K.NEEPS#EEEIDAPK^PK^.K	1.6	2	N	L	1	0.99	0	3.4044	14493186	9026237	1.61	0.99	LN2_1E1_LTQ	4945	2	0.98	0	-	-	-	NEEPS(p)EEEIDAPK()PK()
IPI00477179	DDX21	K.NEEPS#EEEIDAPK^PK^.K	1.6	2	N	L	1	1	0	3.5777	9041048	5438889	1.66	0.96	LN2_1E1_MSA	4607	2	0.98	0	-	-	-	NEEPS(p)EEEIDAPK()PK()
IPI00015953	DDX21	K.NEEPS#EEEIDAPK^PK^.K	1.6	2	N	L	1	1	0	3.5777	9041048	5438889	1.66	0.96	LN2_1E1_MSA	4607	2	0.98	0	-	-	-	NEEPS(p)EEEIDAPK()PK()
IPI00477179	DDX21	K.NEEPS#EEEIDAPKPK.K	1.51	2	N	L	1	0.99	0	3.5279	6041013	4005680	1.51	0.97	LN2_1E1_MSA	4599	3	0.98	0	-	-	-	NEEPS(p)EEEIDAPKPK
IPI00477179	DDX21	K.NEEPS#EEEIDAPKPK.K	1.6	2	N	L	1	0.99	0	3.2044	14493186	9026237	1.61	0.99	LN2_1E1_LTQ	4923	2	0.98	0	-	-	-	NEEPS(p)EEEIDAPKPK
IPI00015953	DDX21	K.NEEPS#EEEIDAPKPK.K	1.6	2	N	L	1	0.99	0	3.2044	14493186	9026237	1.61	0.99	LN2_1E1_LTQ	4923	2	0.98	0	-	-	-	NEEPS(p)EEEIDAPKPK
IPI00015953	DDX21	K.NEEPS#EEEIDAPKPK.K	1.6	2	N	L	1	1	0	3.6117	9041048	5438889	1.66	0.96	LN2_1E1_MSA	4543	2	0.98	0	-	-	-	NEEPS(p)EEEIDAPKPK
IPI00477179	DDX21	K.NEEPS#EEEIDAPKPK.K	1.6	2	N	L	1	1	0	4.2563	9041048	5438889	1.66	0.96	LN2_1E1_MSA	4651	2	0.98	0	-	-	-	NEEPS(p)EEEIDAPKPK
IPI00477179	DDX21	K.NEEPS#EEEIDAPKPK.K	1.62	2	N	L	0.89	0.8	6.66134e-15	3.6264	730079	345911	2.11	0.96	LN2_1E6_MSA	2659	2	0.98	0	-	-	-	NEEPS(p)EEEIDAPKPK
IPI00477179	DDX21	K.NEEPS#EEEIDAPKPK.K	2.09	2	N	L	0.94	0.88	0	3.331	719017	307355	2.34	0.98	LN2_1E6_LTQ	2560	2	0.98	0	-	-	-	NEEPS(p)EEEIDAPKPK
IPI00477179	DDX21	K.NEEPS#EEEIDAPK^PK^.K	0.980392	3	N	H	1	1	0	3.5579	17670903	17203118	1.03	0.99	HN3_1E1_MSA	4753	2	0.98	0	-	-	-	NEEPS(p)EEEIDAPK()PK()
IPI00015953	DDX21	K.NEEPS#EEEIDAPK^PK^.K	0.980392	3	N	H	1	1	0	3.5579	17670903	17203118	1.03	0.99	HN3_1E1_MSA	4753	2	0.98	0	-	-	-	NEEPS(p)EEEIDAPK()PK()
IPI00477179	DDX21	K.NEEPS#EEEIDAPK^PK^.K	1	3	N	H	1	1	0	3.1544	34328332	34220657	1	0.99	HN3_1E1_LTQ	5754	2	0.98	0	-	-	-	NEEPS(p)EEEIDAPK()PK()
IPI00015953	DDX21	K.NEEPS#EEEIDAPK^PK^.K	1	3	N	H	1	1	0	3.0104	34328332	34220657	1	0.99	HN3_1E1_LTQ	5838	2	0.98	0	-	-	-	NEEPS(p)EEEIDAPK()PK()
IPI00477179	DDX21	K.NEEPS#EEEIDAPKPK.K	0.980392	3	N	H	1	1	0	3.9979	17670903	17203118	1.03	0.99	HN3_1E1_MSA	4808	2	0.98	0	-	-	-	NEEPS(p)EEEIDAPKPK
IPI00477179	DDX21	K.NEEPS#EEEIDAPKPK.K	1	3	N	H	1	1	0	3.5079	34328332	34220657	1	0.99	HN3_1E1_LTQ	5755	2	0.98	0	-	-	-	NEEPS(p)EEEIDAPKPK
IPI00015953	DDX21	K.NEEPS#EEEIDAPKPK.K	1	3	N	H	1	1	0	3.5079	34328332	34220657	1	0.99	HN3_1E1_LTQ	5755	2	0.98	0	-	-	-	NEEPS(p)EEEIDAPKPK
IPI00477179	DDX21	K.NEEPS#EEEIDAPKPK.K	1.03093	3	N	H	0.99	0.98	0	3.0282	4594422	4613669	1	0.97	HN3_1E1_MSA	4821	3	0.98	0	-	-	-	NEEPS(p)EEEIDAPKPK
IPI00477179	DDX21	K.NEEPS#EEEIDAPKPK.K	1.06383	3	N	H	1	0.99	0	3.2494	13379902	14357252	0.93	0.98	HN3_1E1_LTQ	5831	3	0.98	0	-	-	-	NEEPS(p)EEEIDAPKPK
IPI00477179	DDX21	K.NEEPS#EEEIDAPKPK.K	1.14943	3	N	H	0.96	0.92	2.22045e-16	2.8732	315579	351245	0.9	0.97	HN3_1E2_LTQ	3830	2	0.98	0	-	-	-	NEEPS(p)EEEIDAPKPK
IPI00477179	DDX21	K.NEEPS#EEEIDAPKPK.K	1.14943	3	N	H	0.93	0.86	5.55112e-16	3.8013	345197	378044	0.91	0.95	HN3_1E2_MSA	3214	2	0.98	0	-	-	-	NEEPS(p)EEEIDAPKPK
IPI00477179	DDX21	K.NEEPS#EEEIDAPK^PK^.K	1.44	3	N	L	1	0.99	0	3.0134	16833758	11738782	1.43	0.99	LN3_1E1_LTQ	5445	3	0.98	0	-	-	-	NEEPS(p)EEEIDAPK()PK()
IPI00015953	DDX21	K.NEEPS#EEEIDAPK^PK^.K	1.52	3	N	L	1	1	0	3.4846	11975816	7882899	1.52	0.99	LN3_1E1_MSA	4704	2	0.98	0	-	-	-	NEEPS(p)EEEIDAPK()PK()
IPI00477179	DDX21	K.NEEPS#EEEIDAPK^PK^.K	1.52	3	N	L	1	1	0	3.6688	11975816	7882899	1.52	0.99	LN3_1E1_MSA	4766	2	0.98	0	-	-	-	NEEPS(p)EEEIDAPK()PK()
IPI00477179	DDX21	K.NEEPS#EEEIDAPK^PK^.K	1.53	3	N	L	1	0.99	0	3.5077	22263930	14203322	1.57	0.98	LN3_1E1_LTQ	5305	2	0.98	0	-	-	-	NEEPS(p)EEEIDAPK()PK()
IPI00477179	DDX21	K.NEEPS#EEEIDAPKPK.K	0.83	3	N	L	0.86	0.73	3.60232e-11	3.102	256159	202738	1.26	0.91	LN3_1E6_LTQ	2530	2	0.98	0	-	-	-	NEEPS(p)EEEIDAPKPK
IPI00477179	DDX21	K.NEEPS#EEEIDAPKPK.K	1.44	3	N	L	1	0.99	0	3.2129	16833758	11738782	1.43	0.99	LN3_1E1_LTQ	5427	3	0.98	0	-	-	-	NEEPS(p)EEEIDAPKPK
IPI00477179	DDX21	K.NEEPS#EEEIDAPKPK.K	1.52	3	N	L	1	1	0	4.0286	11975816	7882899	1.52	0.99	LN3_1E1_MSA	4844	2	0.98	0	-	-	-	NEEPS(p)EEEIDAPKPK
IPI00015953	DDX21	K.NEEPS#EEEIDAPKPK.K	1.52	3	N	L	1	1	0	4.0286	11975816	7882899	1.52	0.99	LN3_1E1_MSA	4844	2	0.98	0	-	-	-	NEEPS(p)EEEIDAPKPK
IPI00477179	DDX21	K.NEEPS#EEEIDAPKPK.K	1.53	3	N	L	1	0.99	0	3.6207	22263930	14203322	1.57	0.98	LN3_1E1_LTQ	5426	2	0.98	0	-	-	-	NEEPS(p)EEEIDAPKPK
IPI00477179	DDX21	K.NEEPS#EEEIDAPKPK.K	0.406504	4	N	H	1	1	0	3.0823	11960849	4924119	2.43	0.99	HN4_1E1_MSA	4520	3	0.98	0	-	-	-	NEEPS(p)EEEIDAPKPK
IPI00477179	DDX21	K.NEEPS#EEEIDAPKPK.K	0.409836	4	N	H	1	1	0	3.2731	47822940	19217075	2.49	0.99	HN4_1E1_LTQ	5924	2	0.98	0	-	-	-	NEEPS(p)EEEIDAPKPK
IPI00015953	DDX21	K.NEEPS#EEEIDAPKPK.K	0.409836	4	N	H	1	1	0	3.2731	47822940	19217075	2.49	0.99	HN4_1E1_LTQ	5924	2	0.98	0	-	-	-	NEEPS(p)EEEIDAPKPK
IPI00477179	DDX21	K.NEEPS#EEEIDAPKPK.K	0.413223	4	N	H	0.99	0.98	0	3.2087	13283572	5524635	2.4	0.98	HN4_1E1_LTQ	5863	3	0.98	0	-	-	-	NEEPS(p)EEEIDAPKPK
IPI00015953	DDX21	K.NEEPS#EEEIDAPKPK.K	0.413223	4	N	H	0.99	0.98	0	3.2087	13283572	5524635	2.4	0.98	HN4_1E1_LTQ	5863	3	0.98	0	-	-	-	NEEPS(p)EEEIDAPKPK
IPI00477179	DDX21	K.NEEPS#EEEIDAPKPK.K	0.425532	4	N	H	1	0.99	0	4.0748	29363581	12028671	2.44	0.99	HN4_1E1_MSA	4511	2	0.98	0	-	-	-	NEEPS(p)EEEIDAPKPK
IPI00015953	DDX21	K.NEEPS#EEEIDAPKPK.K	0.425532	4	N	H	1	0.99	0	4.0748	29363581	12028671	2.44	0.99	HN4_1E1_MSA	4511	2	0.98	0	-	-	-	NEEPS(p)EEEIDAPKPK
IPI00477179	DDX21	K.NEEPS#EEEIDAPKPK.K	0.45045	4	N	H	0.81	0.66	3.03996e-08	3.9807	574557	238113	2.41	0.97	HN4_1E2_LTQ	3302	2	0.98	0	-	-	-	NEEPS(p)EEEIDAPKPK
IPI00477179	DDX21	K.NEEPS#EEEIDAPKPK.K	0.689655	4	N	H	0.7	0.5	7.68426e-09	3.3678	610719	239622	2.55	0.89	HN4_1E2_MSA	2638	2	0.98	0	-	-	-	NEEPS(p)EEEIDAPKPK
IPI00477179	DDX21	K.NEEPS#EEEIDAPK^PK^.K	0.48	4	N	L	1	0.99	0	2.7844	4314054	9064477	0.48	0.98	LN4_1E1_LTQ	4957	2	0.98	0	-	-	-	NEEPS(p)EEEIDAPK()PK()
IPI00015953	DDX21	K.NEEPS#EEEIDAPK^PK^.K	0.48	4	N	L	1	0.99	0	2.7844	4314054	9064477	0.48	0.98	LN4_1E1_LTQ	4957	2	0.98	0	-	-	-	NEEPS(p)EEEIDAPK()PK()
IPI00015953	DDX21	K.NEEPS#EEEIDAPK^PK^.K	0.49	4	N	L	1	1	0	3.3557	2924392	5991232	0.49	0.98	LN4_1E1_MSA	4187	2	0.98	0	-	-	-	NEEPS(p)EEEIDAPK()PK()
IPI00477179	DDX21	K.NEEPS#EEEIDAPK^PK^.K	0.49	4	N	L	1	1	0	3.708	2924392	5991232	0.49	0.98	LN4_1E1_MSA	4250	2	0.98	0	-	-	-	NEEPS(p)EEEIDAPK()PK()
IPI00477179	DDX21	K.NEEPS#EEEIDAPKPK.K	0.48	4	N	L	1	0.99	0	3.9195	4314054	9064477	0.48	0.98	LN4_1E1_LTQ	4892	2	0.98	0	-	-	-	NEEPS(p)EEEIDAPKPK
IPI00015953	DDX21	K.NEEPS#EEEIDAPKPK.K	0.48	4	N	L	1	0.99	0	3.1908	4314054	9064477	0.48	0.98	LN4_1E1_LTQ	4969	2	0.98	0	-	-	-	NEEPS(p)EEEIDAPKPK
IPI00477179	DDX21	K.NEEPS#EEEIDAPKPK.K	0.49	4	N	L	1	1	0	3.8006	2924392	5991232	0.49	0.98	LN4_1E1_MSA	4251	2	0.98	0	-	-	-	NEEPS(p)EEEIDAPKPK
IPI00015953	DDX21	K.NEEPS#EEEIDAPKPK.K	0.49	4	N	L	1	1	0	3.8006	2924392	5991232	0.49	0.98	LN4_1E1_MSA	4251	2	0.98	0	-	-	-	NEEPS(p)EEEIDAPKPK
IPI00006987	DDX24	K.AQAVS#EEEEEEEGK.S	0.680272	0	N	H	0.97	0.94	0	3.4437	728104	494551	1.47	0.98	HN0_1E1_MSA	3967	2	0.98	0	-	-	-	AQAVS(p)EEEEEEEGK
IPI00006987	DDX24	K.AQAVS#EEEEEEEGK.S	0.714286	0	N	H	0.97	0.95	0	2.8857	555549	394354	1.41	0.98	HN0_1E1_LTQ	4134	2	0.98	0	-	-	-	AQAVS(p)EEEEEEEGK
IPI00006987	DDX24	K.AQAVS#EEEEEEEGK^.S	0.680272	0	N	H	0.97	0.94	0	3.1996	728104	494551	1.47	0.98	HN0_1E1_MSA	3983	2	0.98	0	-	-	-	AQAVS(p)EEEEEEEGK()
IPI00006987	DDX24	K.AQAVS#EEEEEEEGK^.S	0.714286	0	N	H	0.97	0.95	0	2.96	555549	394354	1.41	0.98	HN0_1E1_LTQ	4140	2	0.98	0	-	-	-	AQAVS(p)EEEEEEEGK()
IPI00910382	DDX24	K.AQAVS#EEEEEEEGK.S	0.787402	2	N	H	0.98	0.96	9.36318e-12	3.4852	185017	139204	1.33	0.99	HN2_1E1_MSA	4452	2	0.98	0	-	-	-	AQAVS(p)EEEEEEEGK
IPI00006987	DDX24	K.AQAVS#EEEEEEEGK.S	0.892857	2	N	H	0.97	0.93	2.47913e-13	2.6153	796686	675987	1.18	0.99	HN2_1E1_LTQ	4744	2	0.98	0	-	-	-	AQAVS(p)EEEEEEEGK
IPI00910382	DDX24	K.AQAVS#EEEEEEEGK^.S	0.787402	2	N	H	0.98	0.96	9.36318e-12	3.375	185017	139204	1.33	0.99	HN2_1E1_MSA	4453	2	0.98	0	-	-	-	AQAVS(p)EEEEEEEGK()
IPI00006987	DDX24	K.AQAVS#EEEEEEEGK^.S	0.892857	2	N	H	0.97	0.93	2.47913e-13	2.7752	796686	675987	1.18	0.99	HN2_1E1_LTQ	4783	2	0.98	0	-	-	-	AQAVS(p)EEEEEEEGK()
IPI00910382	DDX24	K.AQAVS#EEEEEEEGK.S	1.43	2	N	L	0.93	0.87	1.47216e-13	2.7465	576761	365381	1.58	0.96	LN2_1E1_LTQ	4419	2	0.98	0	-	-	-	AQAVS(p)EEEEEEEGK
IPI00910382	DDX24	K.AQAVS#EEEEEEEGK.S	0.877193	3	N	H	0.98	0.95	0	2.7603	1045999	878677	1.19	0.98	HN3_1E1_LTQ	5227	2	0.98	0	-	-	-	AQAVS(p)EEEEEEEGK
IPI00910382	DDX24	K.AQAVS#EEEEEEEGK.S	0.943396	3	N	H	0.99	0.99	1.33227e-15	3.0338	541437	480223	1.13	0.99	HN3_1E1_MSA	4326	2	0.98	0	-	-	-	AQAVS(p)EEEEEEEGK
IPI00910382	DDX24	K.AQAVS#EEEEEEEGK^.S	0.877193	3	N	H	0.98	0.95	0	3.544	1045999	878677	1.19	0.98	HN3_1E1_LTQ	5238	2	0.98	0	-	-	-	AQAVS(p)EEEEEEEGK()
IPI00910382	DDX24	K.AQAVS#EEEEEEEGK^.S	0.943396	3	N	H	0.99	0.99	1.33227e-15	3.3067	541437	480223	1.13	0.99	HN3_1E1_MSA	4331	2	0.98	0	-	-	-	AQAVS(p)EEEEEEEGK()
IPI00006987	DDX24	K.AQAVS#EEEEEEEGK.S	1.28	3	N	L	0.99	0.98	2.45894e-10	3.016	405309	307133	1.32	0.99	LN3_1E1_MSA	4332	2	0.98	0	-	-	-	AQAVS(p)EEEEEEEGK
IPI00910382	DDX24	K.AQAVS#EEEEEEEGK.S	1.46	3	N	L	1	0.99	0	2.5932	574093	362895	1.58	0.93	LN3_1E1_LTQ	4779	2	0.98	0	-	-	-	AQAVS(p)EEEEEEEGK
IPI00006987	DDX24	K.AQAVS#EEEEEEEGK^.S	1.28	3	N	L	0.99	0.98	2.45894e-10	3.1739	405309	307133	1.32	0.99	LN3_1E1_MSA	4326	2	0.98	0	-	-	-	AQAVS(p)EEEEEEEGK()
IPI00910382	DDX24	K.AQAVS#EEEEEEEGK^.S	1.46	3	N	L	1	0.99	0	2.9994	574093	362895	1.58	0.93	LN3_1E1_LTQ	4787	2	0.98	0	-	-	-	AQAVS(p)EEEEEEEGK()
IPI00910382	DDX24	K.AQAVS#EEEEEEEGK.S	0.526316	4	N	H	1	0.99	0	2.6953	1506483	820355	1.84	0.98	HN4_1E1_LTQ	5271	2	0.98	0	-	-	-	AQAVS(p)EEEEEEEGK
IPI00910382	DDX24	K.AQAVS#EEEEEEEGK.S	0.571429	4	N	H	0.96	0.93	0	3.4446	1047488	568610	1.84	0.97	HN4_1E1_MSA	1865	2	0.98	0	-	-	-	AQAVS(p)EEEEEEEGK
IPI00000207	DDX24	K.AQAVS#EEEEEEEGK.S	0.571429	4	N	H	0.96	0.93	0	3.2509	1047488	568610	1.84	0.97	HN4_1E1_MSA	1925	2	0.98	0	-	-	-	AQAVS(p)EEEEEEEGK
IPI00910382	DDX24	K.AQAVS#EEEEEEEGK.S	0.89	4	N	L	0.98	0.97	0	2.569	288768	346164	0.83	0.95	LN4_1E1_MSA	3872	2	0.98	0	-	-	-	AQAVS(p)EEEEEEEGK
IPI00006987	DDX24	K.AQAVS#EEEEEEEGK^.S	0.79	4	N	L	0.96	0.93	2.10942e-15	2.7365	360580	420627	0.86	0.98	LN4_1E1_LTQ	4430	2	0.98	0	-	-	-	AQAVS(p)EEEEEEEGK()
IPI00910382	DDX24	K.AQAVS#EEEEEEEGK^.S	0.89	4	N	L	0.98	0.97	0	3.0124	288768	346164	0.83	0.95	LN4_1E1_MSA	3830	2	0.98	0	-	-	-	AQAVS(p)EEEEEEEGK()
IPI00910382	DDX24	K.AQAVS#EEEEEEEGK.S	0.714286	5	N	H	0.98	0.97	0	3.2003	1254795	858257	1.46	0.98	HN5_1E1_MSA	2495	2	0.98	0	-	-	-	AQAVS(p)EEEEEEEGK
IPI00910382	DDX24	K.AQAVS#EEEEEEEGK^.S	0.714286	5	N	H	0.98	0.97	0	3.4174	1254795	858257	1.46	0.98	HN5_1E1_MSA	2498	2	0.98	0	-	-	-	AQAVS(p)EEEEEEEGK()
IPI00006987	DDX24	K.AQAVS#EEEEEEEGK^.S	0.833333	5	N	H	0.98	0.96	0	3.1896	1465613	1184355	1.24	0.99	HN5_1E1_LTQ	2660	2	0.98	0	-	-	-	AQAVS(p)EEEEEEEGK()
IPI00006987	DDX24	K.AQAVS#EEEEEEEGK.S	1.07	5	N	L	0.98	0.96	0	3.0912	874584	770939	1.13	0.97	LN5_1E1_MSA	2541	2	0.98	0	-	-	-	AQAVS(p)EEEEEEEGK
IPI00910382	DDX24	K.AQAVS#EEEEEEEGK.S	1.2	5	N	L	0.99	0.98	0	2.5838	1460396	1215365	1.2	0.97	LN5_1E1_LTQ	2718	2	0.98	0	-	-	-	AQAVS(p)EEEEEEEGK
IPI00293078	DDX27	V.Y#AVLQLEAEEK.E	36.7068	2	N	L	-1	0	1	2.729	113167	3083	36.71	0.56	LN2_1E4_LTQ	2630	2	0.98	0	-	-	-	Y(p)AVLQLEAEEK
IPI00293078	DDX27	V.Y#AVLQLEAEEK.E	33.4443	2	N	L	-1	0	1	2.6165	100500	3005	33.44	0.4	LN2_1E5_LTQ	2764	2	0.98	0	-	-	-	Y(p)AVLQLEAEEK
IPI00293078	DDX27	V.Y#AVLQLEAEEK.E	0.670303	3	N	H	-1	0	1	2.6755	17692	11859	1.49	0.17	HN3_1E5_MSA	2508	2	0.98	0	-	-	-	Y(p)AVLQLEAEEK
IPI00939523	DDX46	K.AALGLQDS#DDEDAAVDIDEQIESM*FNSK.K	0.892857	2	N	H	0.96	0.91	0	4.0129	7542746	6784163	1.11	0.97	HN2_1E1_LTQ	12234	3	0.98	61.1	-	-	-	AALGLQDS(p)DDEDAAVDIDEQIESM()FNSK
IPI00939523	DDX46	K.AALGLQDS#DDEDAAVDIDEQIESM*FNSK.K	0.680272	3	N	H	0.95	0.9	0	3.3756	5654278	3695461	1.53	0.96	HN3_1E1_MSA	11562	3	0.98	60.03	-	-	-	AALGLQDS(p)DDEDAAVDIDEQIESM()FNSK
IPI00329791	DDX46	K.AALGLQDS#DDEDAAVDIDEQIESM*FNSK.K	0.429185	4	N	H	0.88	0.77	0	4.0712	13964241	5737858	2.43	0.8	HN4_1E1_MSA	10893	3	0.98	28.37	-	-	-	AALGLQDS(p)DDEDAAVDIDEQIESM()FNSK
IPI00329791	DDX46	K.AALGLQDS#DDEDAAVDIDEQIESM*FNSK.K	0.436681	4	N	H	0.95	0.89	0	3.7012	13913795	5899768	2.36	0.96	HN4_1E1_LTQ	12949	3	0.98	76.4	-	-	-	AALGLQDS(p)DDEDAAVDIDEQIESM()FNSK
IPI00939523	DDX46	K.AALGLQDS#DDEDAAVDIDEQIESM*FNSK.K	0.436681	4	N	H	0.95	0.89	0	3.9876	13913795	5899768	2.36	0.96	HN4_1E1_LTQ	12981	3	0.98	65.99	-	-	-	AALGLQDS(p)DDEDAAVDIDEQIESM()FNSK
IPI00939523	DDX46	K.AALGLQDS#DDEDAAVDIDEQIESM*FNSK.K	0.518135	4	N	H	0.76	0.58	1.84648e-09	5.5124	10274913	4089598	2.51	0.88	HN4_1E1_MSA	10808	3	0.98	136.43	-	-	-	AALGLQDS(p)DDEDAAVDIDEQIESM()FNSK
IPI00939523	DDX46	K.AALGLQDS#DDEDAAVDIDEQIESMFNSK.K	0.355872	4	N	H	0.98	0.96	0	3.4221	12236578	4839220	2.53	0.97	HN4_1E1_LTQ	13803	3	0.98	28.72	-	-	-	AALGLQDS(p)DDEDAAVDIDEQIESMFNSK
IPI00871397	DDX51	R.VNDAEPGS#PEAPQGK.R	0.833333	0	N	H	0.99	0.98	0	3.1502	816903	679969	1.2	0.99	HN0_1E1_LTQ	3584	2	0.98	0	-	-	-	VNDAEPGS(p)PEAPQGK
IPI00871397	DDX51	R.VNDAEPGS#PEAPQGK.R	0.877193	0	N	H	0.99	0.99	4.44089e-16	3.7744	778140	680639	1.14	0.97	HN0_1E1_MSA	3476	2	0.98	0	-	-	-	VNDAEPGS(p)PEAPQGK
IPI00871397	DDX51	R.VNDAEPGS#PEAPQGK^.R	0.833333	0	N	H	0.99	0.98	0	3.0661	816903	679969	1.2	0.99	HN0_1E1_LTQ	3568	2	0.98	0	-	-	-	VNDAEPGS(p)PEAPQGK()
IPI00871397	DDX51	R.VNDAEPGS#PEAPQGK^.R	0.877193	0	N	H	0.99	0.99	4.44089e-16	3.0552	778140	680639	1.14	0.97	HN0_1E1_MSA	3478	2	0.98	0	-	-	-	VNDAEPGS(p)PEAPQGK()
IPI00871397	DDX51	R.VNDAEPGS#PEAPQGK.R	1.06383	2	N	H	1	0.99	0	3.3657	357260	383640	0.93	0.99	HN2_1E1_MSA	4036	2	0.98	0	-	-	-	VNDAEPGS(p)PEAPQGK
IPI00871397	DDX51	R.VNDAEPGS#PEAPQGK^.R	1.06383	2	N	H	0.99	0.98	2.22045e-16	3.2335	983370	1042472	0.94	0.99	HN2_1E1_LTQ	4118	2	0.98	0	-	-	-	VNDAEPGS(p)PEAPQGK()
IPI00871397	DDX51	R.VNDAEPGS#PEAPQGK^.R	1.06383	2	N	H	1	0.99	0	2.7178	357260	383640	0.93	0.99	HN2_1E1_MSA	4035	2	0.98	0	-	-	-	VNDAEPGS(p)PEAPQGK()
IPI00871397	DDX51	R.VNDAEPGS#PEAPQGK.R	1.41	2	N	L	0.99	0.98	0	2.929	1148226	809136	1.42	0.98	LN2_1E1_LTQ	3872	2	0.98	0	-	-	-	VNDAEPGS(p)PEAPQGK
IPI00871397	DDX51	R.VNDAEPGS#PEAPQGK.R	1.73	2	N	L	0.99	0.98	0	3.1353	921233	582328	1.58	0.98	LN2_1E1_MSA	3748	2	0.98	0	-	-	-	VNDAEPGS(p)PEAPQGK
IPI00871397	DDX51	R.VNDAEPGS#PEAPQGK^.R	1.41	2	N	L	0.99	0.98	0	3.2838	1148226	809136	1.42	0.98	LN2_1E1_LTQ	3881	2	0.98	0	-	-	-	VNDAEPGS(p)PEAPQGK()
IPI00871397	DDX51	R.VNDAEPGS#PEAPQGK^.R	1.73	2	N	L	0.99	0.98	0	2.9786	921233	582328	1.58	0.98	LN2_1E1_MSA	3749	2	0.98	0	-	-	-	VNDAEPGS(p)PEAPQGK()
IPI00871397	DDX51	R.VNDAEPGS#PEAPQGK.R	0.8	3	N	H	1	0.99	0	3.1809	851777	744886	1.14	0.97	HN3_1E1_MSA	3958	2	0.98	0	-	-	-	VNDAEPGS(p)PEAPQGK
IPI00871397	DDX51	R.VNDAEPGS#PEAPQGK^.R	0.763359	3	N	H	0.99	0.99	0	2.8901	1826055	1464249	1.25	0.99	HN3_1E1_LTQ	4634	2	0.98	0	-	-	-	VNDAEPGS(p)PEAPQGK()
IPI00871397	DDX51	R.VNDAEPGS#PEAPQGK^.R	0.8	3	N	H	1	0.99	0	3.187	851777	744886	1.14	0.97	HN3_1E1_MSA	3961	2	0.98	0	-	-	-	VNDAEPGS(p)PEAPQGK()
IPI00871397	DDX51	R.VNDAEPGS#PEAPQGK.R	1.17	3	N	L	1	0.99	0	4.0383	1245453	1085720	1.15	0.99	LN3_1E1_LTQ	4172	2	0.98	0	-	-	-	VNDAEPGS(p)PEAPQGK
IPI00871397	DDX51	R.VNDAEPGS#PEAPQGK.R	1.27	3	N	L	0.98	0.97	0	2.6303	768554	652791	1.18	0.97	LN3_1E1_MSA	3872	2	0.98	0	-	-	-	VNDAEPGS(p)PEAPQGK
IPI00871397	DDX51	R.VNDAEPGS#PEAPQGK^.R	1.17	3	N	L	1	0.99	0	3.5193	1245453	1085720	1.15	0.99	LN3_1E1_LTQ	4179	2	0.98	0	-	-	-	VNDAEPGS(p)PEAPQGK()
IPI00871397	DDX51	R.VNDAEPGS#PEAPQGK^.R	1.27	3	N	L	0.98	0.97	0	2.9864	768554	652791	1.18	0.97	LN3_1E1_MSA	3874	2	0.98	0	-	-	-	VNDAEPGS(p)PEAPQGK()
IPI00871397	DDX51	R.VNDAEPGS#PEAPQGK.R	0.413223	4	N	H	0.99	0.98	0	3.2572	731879	308497	2.37	0.99	HN4_1E1_MSA	745	2	0.98	0	-	-	-	VNDAEPGS(p)PEAPQGK
IPI00217541	DDX51	R.VNDAEPGS#PEAPQGK.R	0.414938	4	N	H	0.95	0.9	0	3.0582	3603544	1402104	2.57	0.96	HN4_1E1_LTQ	2873	2	0.98	0	-	-	-	VNDAEPGS(p)PEAPQGK
IPI00871397	DDX51	R.VNDAEPGS#PEAPQGK.R	0.414938	4	N	H	0.95	0.9	0	3.1345	3603544	1402104	2.57	0.96	HN4_1E1_LTQ	2942	2	0.98	0	-	-	-	VNDAEPGS(p)PEAPQGK
IPI00871397	DDX51	R.VNDAEPGS#PEAPQGK.R	0.43	4	N	L	0.99	0.99	0	2.7673	259623	625862	0.41	0.95	LN4_1E1_MSA	3392	2	0.98	0	-	-	-	VNDAEPGS(p)PEAPQGK
IPI00871397	DDX51	R.VNDAEPGS#PEAPQGK.R	0.47	4	N	L	0.99	0.98	1.11022e-16	3.1823	519095	1086176	0.48	0.99	LN4_1E1_LTQ	3865	2	0.98	0	-	-	-	VNDAEPGS(p)PEAPQGK
IPI00871397	DDX51	R.VNDAEPGS#PEAPQGK^.R	0.43	4	N	L	0.99	0.99	0	3.582	259623	625862	0.41	0.95	LN4_1E1_MSA	3388	2	0.98	0	-	-	-	VNDAEPGS(p)PEAPQGK()
IPI00871397	DDX51	R.VNDAEPGS#PEAPQGK^.R	0.47	4	N	L	0.99	0.98	1.11022e-16	2.9786	519095	1086176	0.48	0.99	LN4_1E1_LTQ	3854	2	0.98	0	-	-	-	VNDAEPGS(p)PEAPQGK()
IPI00871397	DDX51	R.VNDAEPGS#PEAPQGK.R	0.45045	5	N	H	0.97	0.94	0	3.2984	1392969	594512	2.34	0.98	HN5_1E1_MSA	2000	2	0.98	0	-	-	-	VNDAEPGS(p)PEAPQGK
IPI00871397	DDX51	R.VNDAEPGS#PEAPQGK.R	0.657895	5	N	H	0.81	0.66	1.87441e-07	2.9112	209383	99668	2.1	0.95	HN5_3E1_LTQ	1871	2	0.98	0	-	-	-	VNDAEPGS(p)PEAPQGK
IPI00871397	DDX51	R.VNDAEPGS#PEAPQGK^.R	0.45045	5	N	H	0.97	0.94	0	3.392	1392969	594512	2.34	0.98	HN5_1E1_MSA	2024	2	0.98	0	-	-	-	VNDAEPGS(p)PEAPQGK()
IPI00871397	DDX51	R.VNDAEPGS#PEAPQGK.R	0.55	5	N	L	0.98	0.96	0	2.9219	673675	1247434	0.54	0.99	LN5_1E1_MSA	2029	2	0.98	0	-	-	-	VNDAEPGS(p)PEAPQGK
IPI00871397	DDX51	R.VNDAEPGS#PEAPQGK.R	0.61	5	N	L	0.98	0.96	0	2.7902	887217	1552013	0.57	0.97	LN5_1E1_LTQ	2124	2	0.98	0	-	-	-	VNDAEPGS(p)PEAPQGK
IPI00871397	DDX51	R.VNDAEPGS#PEAPQGK^.R	0.55	5	N	L	0.98	0.96	0	3.3182	673675	1247434	0.54	0.99	LN5_1E1_MSA	2026	2	0.98	0	-	-	-	VNDAEPGS(p)PEAPQGK()
IPI00871397	DDX51	R.VNDAEPGS#PEAPQGK^.R	0.61	5	N	L	0.98	0.96	0	3.0915	887217	1552013	0.57	0.97	LN5_1E1_LTQ	2103	2	0.98	0	-	-	-	VNDAEPGS(p)PEAPQGK()
IPI00152510	DDX54	K.IDDRDS#DEEGASDR.R	1.16279	2	N	H	0.99	0.99	0	3.3195	769111	937569	0.82	0.99	HN2_1E1_MSA	3633	2	0.98	79.74	-	-	-	IDDRDS(p)DEEGASDR
IPI00879999	DDX54	K.IDDRDS#DEEGASDR.R	1.28205	2	N	H	0.99	0.99	0	3.6601	1534394	1939374	0.79	0.99	HN2_1E1_LTQ	3588	2	0.98	77.37	-	-	-	IDDRDS(p)DEEGASDR
IPI00879999	DDX54	K.IDDRDS#DEEGASDR.R	1.53	2	N	L	0.99	0.98	0	3.1429	1321693	882088	1.5	0.99	LN2_1E1_LTQ	3445	2	0.98	75.35	-	-	-	IDDRDS(p)DEEGASDR
IPI00152510	DDX54	K.IDDRDS#DEEGASDR.R	1.54	2	N	L	0.98	0.95	5.88418e-15	2.81	727255	481488	1.51	0.98	LN2_1E1_MSA	3491	2	0.98	82.05	-	-	-	IDDRDS(p)DEEGASDR
IPI00152510	DDX54	K.IDDRDS#DEEGASDR.R	1.13636	3	N	H	0.97	0.95	0	2.7863	959537	1080730	0.89	0.99	HN3_1E1_LTQ	4252	2	0.98	69.4	-	-	-	IDDRDS(p)DEEGASDR
IPI00879999	DDX54	K.IDDRDS#DEEGASDR.R	0.606061	4	N	H	0.99	0.97	1.77636e-15	2.7173	414871	262980	1.58	1	HN4_1E1_MSA	494	2	0.98	51.46	-	-	-	IDDRDS(p)DEEGASDR
IPI00879999	DDX54	K.IDDRDS#DEEGASDR.R	0.88	4	N	L	0.99	0.98	0	3.2731	657561	750123	0.88	0.98	LN4_1E1_MSA	3091	2	0.98	76.45	-	-	-	IDDRDS(p)DEEGASDR
IPI00152510	DDX54	K.IDDRDS#DEEGASDR.R	0.91	4	N	L	0.98	0.95	0	3.3292	734958	760392	0.97	0.98	LN4_1E1_LTQ	3418	3	0.98	50.79	-	-	-	IDDRDS(p)DEEGASDR
IPI00879999	DDX54	K.IDDRDS#DEEGASDR.R	0.91	4	N	L	0.99	0.97	0	3.219	511505	554473	0.92	0.99	LN4_1E1_MSA	3085	3	0.98	42.21	-	-	-	IDDRDS(p)DEEGASDR
IPI00791512	DDX55	R.KREEGS#DIEDEDMEELL.N	1.78571	3	N	H	0.69	0.47	4.70353e-06	2.9118	883493	1023535	0.86	0.79	HN3_1E1_MSA	9386	2	0.98	0	-	-	-	KREEGS(p)DIEDEDMEELL
IPI00791512	DDX55	R.KREEGS#DIEDEDMEELL.N	0.8	4	N	H	0.65	0.42	1.42701e-05	2.9692	1543129	1058239	1.46	0.94	HN4_1E1_MSA	8580	2	0.98	0	-	-	-	KREEGS(p)DIEDEDMEELL
IPI00942944	DEK	R.EES#EEEEDEDDEEEEEEEK.E	0.769231	0	N	H	0.99	0.99	0	2.8137	1213704	935334	1.3	0.99	HN0_1E1_LTQ	4408	2	0.98	0	-	-	-	EES(p)EEEEDEDDEEEEEEEK
IPI00942944	DEK	R.EES#EEEEDEDDEEEEEEEK^.E	0.769231	0	N	H	0.99	0.99	0	3.1591	1213704	935334	1.3	0.99	HN0_1E1_LTQ	4392	2	0.98	0	-	-	-	EES(p)EEEEDEDDEEEEEEEK()
IPI00942944	DEK	R.EES#EEEEDEDDEEEEEEEK.E	0.729927	3	N	H	1	0.99	0	3.0566	3081545	2212217	1.39	1	HN3_1E1_LTQ	5453	2	0.98	0	-	-	-	EES(p)EEEEDEDDEEEEEEEK
IPI00942944	DEK	R.EES#EEEEDEDDEEEEEEEK.E	0.833333	3	N	H	1	0.99	0	4.3691	1585888	1351148	1.17	1	HN3_1E1_MSA	4439	2	0.98	0	-	-	-	EES(p)EEEEDEDDEEEEEEEK
IPI00942944	DEK	R.EES#EEEEDEDDEEEEEEEK^.E	0.729927	3	N	H	1	0.99	0	3.5977	3081545	2212217	1.39	1	HN3_1E1_LTQ	5485	2	0.98	0	-	-	-	EES(p)EEEEDEDDEEEEEEEK()
IPI00942944	DEK	R.EES#EEEEDEDDEEEEEEEK^.E	1.03	3	N	L	0.99	0.99	0	3.5924	751894	751438	1	0.99	LN3_1E1_LTQ	5028	2	0.98	0	-	-	-	EES(p)EEEEDEDDEEEEEEEK()
IPI00968273	DEK	R.EES#EEEEDEDDEEEEEEEK^.E	1.11	3	N	L	0.98	0.97	2.22045e-16	3.331	553930	501113	1.11	1	LN3_1E1_MSA	4504	2	0.98	0	-	-	-	EES(p)EEEEDEDDEEEEEEEK()
IPI00942944	DEK	R.EES#EEEEDEDDEEEEEEEK.E	0.446429	4	N	H	0.99	0.99	0	3.2493	3664908	1641909	2.23	1	HN4_1E1_LTQ	5573	2	0.98	0	-	-	-	EES(p)EEEEDEDDEEEEEEEK
IPI00942944	DEK	R.EES#EEEEDEDDEEEEEEEK.E	0.571429	4	N	H	0.85	0.73	0	3.9804	5031177	2402313	2.09	0.88	HN4_1E1_MSA	3593	2	0.98	0	-	-	-	EES(p)EEEEDEDDEEEEEEEK
IPI00942944	DEK	R.EES#EEEEDEDDEEEEEEEK.E	0.62	4	N	L	0.99	0.97	0	3.1795	499579	769222	0.65	0.97	LN4_1E1_LTQ	4706	2	0.98	0	-	-	-	EES(p)EEEEDEDDEEEEEEEK
IPI00942944	DEK	R.EES#EEEEDEDDEEEEEEEK^.E	0.62	4	N	L	0.99	0.97	0	4.1258	499579	769222	0.65	0.97	LN4_1E1_LTQ	4704	2	0.98	0	-	-	-	EES(p)EEEEDEDDEEEEEEEK()
IPI00909779	DEK	R.EES#EEEEDEDDEEEEEEEK.E	0.398406	5	N	H	0.99	0.98	0	3.9267	1683354	665538	2.53	0.98	HN5_1E1_MSA	2728	2	0.98	0	-	-	-	EES(p)EEEEDEDDEEEEEEEK
IPI00942944	DEK	R.EES#EEEEDEDDEEEEEEEK.E	0.408163	5	N	H	0.99	0.98	0	2.8633	2400665	935458	2.57	0.99	HN5_1E1_LTQ	2940	2	0.98	0	-	-	-	EES(p)EEEEDEDDEEEEEEEK
IPI00942944	DEK	R.EES#EEEEDEDDEEEEEEEK.E	0.62	5	N	L	0.98	0.97	0	3.514	514956	865516	0.59	0.99	LN5_1E1_MSA	2751	2	0.98	0	-	-	-	EES(p)EEEEDEDDEEEEEEEK
IPI00942944	DEK	R.EES#EEEEDEDDEEEEEEEK^.E	0.59	5	N	L	0.99	0.98	0	2.8621	886169	1501182	0.59	0.98	LN5_1E1_LTQ	2925	2	0.98	0	-	-	-	EES(p)EEEEDEDDEEEEEEEK()
IPI00968273	DEK	R.EES#EEEEDEDDEEEEEEEKEK.S	1.09	3	N	L	1	0.99	0	3.0865	1756579	1607171	1.09	0.99	LN3_1E1_MSA	4617	3	0.98	0	-	-	-	EES(p)EEEEDEDDEEEEEEEKEK
IPI00479194	DEPDC5	K.SVDEFPEINRAS#.I	2.08333	0	N	H	0.03	0	0.422677	2.7492	889509	18668	47.65	0.81	HN0_1E5_LTQ	2459	2	0.98	0	-	-	-	SVDEFPEINRASS(p)VDEFPEINRAS(p)
IPI00294501	DHCR7	K.AKS#LDGVTNDR.T	0.401606	4	N	H	0.92	0.85	2.96441e-12	2.5415	268190	93588	2.87	0.98	HN4_1E1_MSA	1377	2	0.98	34.79	-	-	-	AKS(p)LDGVTNDR
IPI00619921	DIDO1	N.ISTSESRS#PPEGDTTLFLSR.L	0.82	2	N	L	0.8	0.64	3.85055e-09	3.0353	1226938	1407878	0.87	0.89	LN2_1E1_MSA	7509	3	0.98	0	-	-	-	ISTSES(p)RSPPEGDTTLFLSR
IPI00619921	DIDO1	R.RNS#VERPAEPVAGAATPSLVEQQK.M	0.854701	0	N	H	0.97	0.94	0	3.1638	1654983	1384245	1.2	0.98	HN0_1E2_LTQ	4566	3	0.98	20.91	-	-	-	RNS(p)VERPAEPVAGAATPSLVEQQK
IPI00619921	DIDO1	R.RNS#VERPAEPVAGAATPSLVEQQK.M	0.909091	0	N	H	0.97	0.93	0	4.063	1955406	1676045	1.17	0.98	HN0_1E2_MSA	4629	3	0.98	25.66	-	-	-	RNS(p)VERPAEPVAGAATPSLVEQQK
IPI00619921	DIDO1	R.RNS#VERPAEPVAGAATPSLVEQQK.M	0.666667	3	N	H	0.97	0.94	0	3.9008	3979342	2687653	1.48	0.99	HN3_1E2_LTQ	5323	3	0.98	31.29	-	-	-	RNS(p)VERPAEPVAGAATPSLVEQQK
IPI00619921	DIDO1	R.RNS#VERPAEPVAGAATPSLVEQQK.M	0.79	3	N	L	0.98	0.96	0	4.0714	2032116	2562479	0.79	0.95	LN3_1E1_LTQ	7165	3	0.98	35.39	-	-	-	RNS(p)VERPAEPVAGAATPSLVEQQK
IPI00619921	DIDO1	R.RNS#VERPAEPVAGAATPSLVEQQK.M	0.239808	4	N	H	0.99	0.97	0	4.2771	6200756	1593529	3.89	0.99	HN4_1E2_MSA	3823	3	0.98	51.92	-	-	-	RNS(p)VERPAEPVAGAATPSLVEQQK
IPI00619921	DIDO1	R.RNS#VERPAEPVAGAATPSLVEQQK.M	0.255102	4	N	H	0.98	0.96	0	3.7681	5943510	1599808	3.72	0.99	HN4_1E2_LTQ	4564	3	0.98	36.34	-	-	-	RNS(p)VERPAEPVAGAATPSLVEQQK
IPI00619921	DIDO1	R.RNS#VERPAEPVAGAATPSLVEQQK.M	0.297619	4	N	H	0.88	0.77	3.26905e-12	3.0407	2852373	840256	3.39	0.96	HN4_1E1_LTQ	7586	3	0.98	33.39	-	-	-	RNS(p)VERPAEPVAGAATPSLVEQQK
IPI00619921	DIDO1	R.RNS#VERPAEPVAGAATPSLVEQQK.M	0.200803	5	N	H	0.99	0.99	0	3.8308	8448291	1805542	4.68	0.99	HN5_8E1_MSA	3073	3	0.98	20.66	-	-	-	RNS(p)VERPAEPVAGAATPSLVEQQK
IPI00619921	DIDO1	R.RNS#VERPAEPVAGAATPSLVEQQK.M	0.20284	5	N	H	0.99	0.99	0	3.544	16825350	3490917	4.82	0.98	HN5_8E1_LTQ	3587	3	0.98	6.46	-	-	-	RNS(p)VERPAEPVAGAATPSLVEQQK
IPI00619921	DIDO1	R.S#PPEGDTTLFLSR.L	0.862069	2	N	H	0.95	0.9	0	2.542	5625718	5259986	1.07	0.97	HN2_1E1_LTQ	9417	2	0.98	49.39	-	-	-	S(p)PPEGDTTLFLSR
IPI00619921	DIDO1	R.S#PPEGDTTLFLSR.L	0.909091	2	N	H	0.94	0.88	0	2.5659	4269501	3919612	1.09	0.97	HN2_1E1_MSA	8260	2	0.98	45.97	-	-	-	S(p)PPEGDTTLFLSR
IPI00619921	DIDO1	R.S#PPEGDTTLFLSR@.L	0.909091	2	N	H	0.94	0.88	0	2.5967	4269501	3919612	1.09	0.97	HN2_1E1_MSA	8158	2	0.98	48.15	-	-	-	S(p)PPEGDTTLFLSR()
IPI00619921	DIDO1	R.S#PPEGDTTLFLSR.L	1.07	2	N	L	0.93	0.87	0	2.6661	3698406	3300618	1.12	0.96	LN2_1E1_MSA	7904	2	0.98	43.61	-	-	-	S(p)PPEGDTTLFLSR
IPI00249982	DIDO1	R.S#PPEGDTTLFLSR.L	1.07	2	N	L	0.93	0.87	0	2.5178	3698406	3300618	1.12	0.96	LN2_1E1_MSA	7999	2	0.98	51.88	-	-	-	S(p)PPEGDTTLFLSR
IPI00249982	DIDO1	R.S#PPEGDTTLFLSR@.L	1.07	2	N	L	0.93	0.87	0	2.8676	3698406	3300618	1.12	0.96	LN2_1E1_MSA	7929	2	0.98	40.79	-	-	-	S(p)PPEGDTTLFLSR()
IPI00619921	DIDO1	R.S#PPEGDTTLFLSR@.L	1.07	2	N	L	0.93	0.87	0	2.8676	3698406	3300618	1.12	0.96	LN2_1E1_MSA	7929	2	0.98	40.79	-	-	-	S(p)PPEGDTTLFLSR()
IPI00619921	DIDO1	R.S#PPEGDTTLFLSR.L	0.68	3	N	L	0.94	0.89	0	2.773	2936751	4646425	0.63	0.95	LN3_1E1_MSA	8154	2	0.98	43.09	-	-	-	S(p)PPEGDTTLFLSR
IPI00619921	DIDO1	R.S#PPEGDTTLFLSR@.L	0.68	3	N	L	0.94	0.89	0	2.5339	2936751	4646425	0.63	0.95	LN3_1E1_MSA	8004	2	0.98	37.13	-	-	-	S(p)PPEGDTTLFLSR()
IPI00619921	DIDO1	R.S#PPEGDTTLFLSR.L	0.285714	4	N	H	0.92	0.85	0	2.932	9861643	2678612	3.68	0.96	HN4_1E1_MSA	7474	2	0.98	61.1	-	-	-	S(p)PPEGDTTLFLSR
IPI00619921	DIDO1	R.S#PPEGDTTLFLSR.L	0.34	4	N	L	0.91	0.83	0	2.5324	996718	3060267	0.33	0.96	LN4_1E1_MSA	7437	2	0.98	25.26	-	-	-	S(p)PPEGDTTLFLSR
IPI00619921	DIDO1	R.S#PPEGDTTLFLSR@.L	0.34	4	N	L	0.91	0.83	0	2.6704	996718	3060267	0.33	0.96	LN4_1E1_MSA	7328	2	0.98	35.55	-	-	-	S(p)PPEGDTTLFLSR()
IPI00619921	DIDO1	R.S#PPEGDTTLFLSR.L	0.302115	5	N	H	0.94	0.88	0	2.8318	5566879	1504630	3.7	0.96	HN5_1E1_MSA	6147	2	0.98	46.62	-	-	-	S(p)PPEGDTTLFLSR
IPI00249982	DIDO1	R.S#PPEGDTTLFLSR.L	0.28	5	N	L	0.96	0.93	0	2.5406	1755238	6138617	0.29	0.95	LN5_1E1_LTQ	6612	2	0.98	58.23	-	-	-	S(p)PPEGDTTLFLSR
IPI00619921	DIDO1	R.S#PPEGDTTLFLSR.L	0.28	5	N	L	0.96	0.93	0	2.7942	1755238	6138617	0.29	0.95	LN5_1E1_LTQ	6670	2	0.98	38.21	-	-	-	S(p)PPEGDTTLFLSR
IPI00619921	DIDO1	R.S#PPEGDTTLFLSR@.L	0.29	5	N	L	0.92	0.84	0	3.0154	1244689	4361512	0.29	0.93	LN5_1E1_MSA	6048	2	0.98	51.69	-	-	-	S(p)PPEGDTTLFLSR()
IPI00874145	DKC1;SNORA56	K.AGLESGAEPGDGDS#DTTK.K	0.909091	0	N	H	1	1	0	3.7054	16538533	14929199	1.11	0.99	HN0_1E1_MSA	3899	2	0.98	16.34	-	-	-	AGLESGAEPGDGDS(p)DTTK
IPI00874145	DKC1;SNORA56	K.AGLESGAEPGDGDS#DTTK.K	0.917431	0	N	H	1	1	0	3.067	13928847	12700942	1.1	0.99	HN0_1E1_LTQ	4072	2	0.98	23.85	-	-	-	AGLESGAEPGDGDS(p)DTTK
IPI00874145	DKC1;SNORA56	K.AGLESGAEPGDGDS#DTTK^.K	0.909091	0	N	H	1	1	0	3.2872	16538533	14929199	1.11	0.99	HN0_1E1_MSA	3879	2	0.98	16.02	-	-	-	AGLESGAEPGDGDS(p)DTTK()
IPI00874145	DKC1;SNORA56	K.AGLESGAEPGDGDS#DTTK.K	1.08696	2	N	H	1	1	0	3.2521	29125881	31685364	0.92	1	HN2_1E1_LTQ	4770	2	0.98	16.67	-	-	-	AGLESGAEPGDGDS(p)DTTK
IPI00874145	DKC1;SNORA56	K.AGLESGAEPGDGDS#DTTK.K	1.13636	2	N	H	1	1	0	3.7457	6425921	7207116	0.89	0.97	HN2_1E1_MSA	4457	2	0.98	23.68	-	-	-	AGLESGAEPGDGDS(p)DTTK
IPI00874145	DKC1;SNORA56	K.AGLESGAEPGDGDS#DTTK.K	1.33	2	N	L	1	1	0	3.3518	30209213	22511427	1.34	0.99	LN2_1E1_LTQ	4380	2	0.98	15.92	-	-	-	AGLESGAEPGDGDS(p)DTTK
IPI00873935	DKC1;SNORA56	K.AGLESGAEPGDGDS#DTTK.K	1.34	2	N	L	1	1	0	2.9994	15695520	11514512	1.36	0.99	LN2_1E1_MSA	4137	2	0.98	20.83	-	-	-	AGLESGAEPGDGDS(p)DTTK
IPI00874145	DKC1;SNORA56	K.AGLESGAEPGDGDS#DTTK.K	2.51	2	N	L	0.97	0.94	0	4.0303	1615669	628287	2.57	0.99	LN2_1E6_MSA	2246	2	0.98	7.13	-	-	-	AGLESGAEPGDGDS(p)DTTK
IPI00874145	DKC1;SNORA56	K.AGLESGAEPGDGDS#DTTK^.K	1.33	2	N	L	1	1	0	3.6666	30209213	22511427	1.34	0.99	LN2_1E1_LTQ	4437	2	0.98	7.25	-	-	-	AGLESGAEPGDGDS(p)DTTK()
IPI00873935	DKC1;SNORA56	K.AGLESGAEPGDGDS#DTTK^.K	1.34	2	N	L	1	1	0	3.5239	15695520	11514512	1.36	0.99	LN2_1E1_MSA	4218	2	0.98	22.37	-	-	-	AGLESGAEPGDGDS(p)DTTK()
IPI00873935	DKC1;SNORA56	K.AGLESGAEPGDGDS#DTTK.K	0.666667	3	N	H	0.93	0.86	6.71685e-14	3.0947	333519	204434	1.63	0.97	HN3_1E2_MSA	2816	2	0.98	12.31	-	-	-	AGLESGAEPGDGDS(p)DTTK
IPI00874145	DKC1;SNORA56	K.AGLESGAEPGDGDS#DTTK.K	0.719424	3	N	H	1	1	0	3.0148	14137318	10377680	1.36	0.99	HN3_1E1_MSA	4376	2	0.98	7.53	-	-	-	AGLESGAEPGDGDS(p)DTTK
IPI00874145	DKC1;SNORA56	K.AGLESGAEPGDGDS#DTTK^.K	0.719424	3	N	H	1	1	0	3.1573	14137318	10377680	1.36	0.99	HN3_1E1_MSA	4272	2	0.98	0	-	-	-	AGLESGAEPGDGDS(p)DTTK()
IPI00874145	DKC1;SNORA56	K.AGLESGAEPGDGDS#DTTK.K	0.83	3	N	L	1	1	0	3.1023	15298253	18606268	0.82	0.99	LN3_1E1_LTQ	4750	2	0.98	16.34	-	-	-	AGLESGAEPGDGDS(p)DTTK
IPI00874145	DKC1;SNORA56	K.AGLESGAEPGDGDS#DTTK^.K	0.83	3	N	L	1	1	0	3.0915	15298253	18606268	0.82	0.99	LN3_1E1_LTQ	4678	2	0.98	24.05	-	-	-	AGLESGAEPGDGDS(p)DTTK()
IPI00874145	DKC1;SNORA56	K.AGLESGAEPGDGDS#DTTK^.K	0.83	3	N	L	1	1	0	4.0532	10468878	12669888	0.83	0.98	LN3_1E1_MSA	4265	2	0.98	29.14	-	-	-	AGLESGAEPGDGDS(p)DTTK()
IPI00874145	DKC1;SNORA56	K.AGLESGAEPGDGDS#DTTK.K	0.406504	4	N	H	1	1	0	3.8362	24619208	9871901	2.49	0.97	HN4_1E1_MSA	1753	2	0.98	13.69	-	-	-	AGLESGAEPGDGDS(p)DTTK
IPI00221394	DKC1;SNORA56	K.AGLESGAEPGDGDS#DTTK.K	0.406504	4	N	H	1	1	0	3.3909	24619208	9871901	2.49	0.97	HN4_1E1_MSA	1835	2	0.98	10.82	-	-	-	AGLESGAEPGDGDS(p)DTTK
IPI00874145	DKC1;SNORA56	K.AGLESGAEPGDGDS#DTTK.K	0.4329	4	N	H	1	1	0	3.4098	28291460	11985083	2.36	0.99	HN4_1E1_LTQ	5225	2	0.98	6.4	-	-	-	AGLESGAEPGDGDS(p)DTTK
IPI00221394	DKC1;SNORA56	K.AGLESGAEPGDGDS#DTTK.K	0.48	4	N	L	1	1	0	2.8779	9663530	20361497	0.47	0.99	LN4_1E1_LTQ	4312	2	0.98	23.68	-	-	-	AGLESGAEPGDGDS(p)DTTK
IPI00874145	DKC1;SNORA56	K.AGLESGAEPGDGDS#DTTK.K	0.48	4	N	L	1	1	0	3.0252	9663530	20361497	0.47	0.99	LN4_1E1_LTQ	4380	2	0.98	23.68	-	-	-	AGLESGAEPGDGDS(p)DTTK
IPI00874145	DKC1;SNORA56	K.AGLESGAEPGDGDS#DTTK.K	0.48	4	N	L	1	1	0	3.3958	5352732	11429224	0.47	0.99	LN4_1E1_MSA	3740	2	0.98	23.93	-	-	-	AGLESGAEPGDGDS(p)DTTK
IPI00221394	DKC1;SNORA56	K.AGLESGAEPGDGDS#DTTK^.K	0.48	4	N	L	1	1	0	3.4085	9663530	20361497	0.47	0.99	LN4_1E1_LTQ	4245	2	0.98	14.8	-	-	-	AGLESGAEPGDGDS(p)DTTK()
IPI00874145	DKC1;SNORA56	K.AGLESGAEPGDGDS#DTTK^.K	0.48	4	N	L	1	1	0	3.4085	9663530	20361497	0.47	0.99	LN4_1E1_LTQ	4245	2	0.98	14.8	-	-	-	AGLESGAEPGDGDS(p)DTTK()
IPI00874145	DKC1;SNORA56	K.AGLESGAEPGDGDS#DTTK^.K	0.48	4	N	L	1	1	0	3.3058	5352732	11429224	0.47	0.99	LN4_1E1_MSA	3699	2	0.98	17.48	-	-	-	AGLESGAEPGDGDS(p)DTTK()
IPI00873935	DKC1;SNORA56	K.AGLESGAEPGDGDS#DTTK.K	0.3367	5	N	H	0.98	0.96	0	2.582	1579521	503370	3.14	0.98	HN5_2E1_LTQ	1684	2	0.98	6.94	-	-	-	AGLESGAEPGDGDS(p)DTTK
IPI00874145	DKC1;SNORA56	K.AGLESGAEPGDGDS#DTTK.K	0.346021	5	N	H	1	1	0	2.8492	31259666	10589632	2.95	0.99	HN5_1E1_MSA	2459	2	0.98	11.36	-	-	-	AGLESGAEPGDGDS(p)DTTK
IPI00874145	DKC1;SNORA56	K.AGLESGAEPGDGDS#DTTK^.K	0.331126	5	N	H	0.98	0.97	0	3.6795	1686514	549624	3.07	0.99	HN5_2E1_MSA	1518	2	0.98	9.02	-	-	-	AGLESGAEPGDGDS(p)DTTK()
IPI00874145	DKC1;SNORA56	K.AGLESGAEPGDGDS#DTTK^.K	0.346021	5	N	H	1	1	0	2.7503	31259666	10589632	2.95	0.99	HN5_1E1_MSA	2454	2	0.98	5.29	-	-	-	AGLESGAEPGDGDS(p)DTTK()
IPI00874145	DKC1;SNORA56	K.AGLESGAEPGDGDS#DTTK.K	0.37	5	N	L	0.99	0.99	0	2.999	1727281	4580241	0.38	0.98	LN5_2E1_MSA	1683	2	0.98	25.75	-	-	-	AGLESGAEPGDGDS(p)DTTK
IPI00874145	DKC1;SNORA56	K.AGLESGAEPGDGDS#DTTK.K	0.44	5	N	L	0.96	0.91	0	3.1909	440725	1119901	0.39	0.98	LN5_1E2_MSA	1859	2	0.98	6.15	-	-	-	AGLESGAEPGDGDS(p)DTTK
IPI00873935	DKC1;SNORA56	K.AGLESGAEPGDGDS#DTTK^.K	0.37	5	N	L	0.99	0.97	0	3.4894	1546302	3961497	0.39	0.99	LN5_2E1_LTQ	1856	2	0.98	10.6	-	-	-	AGLESGAEPGDGDS(p)DTTK()
IPI00874145	DKC1;SNORA56	K.AGLESGAEPGDGDS#DTTK^.K	0.37	5	N	L	0.99	0.99	0	3.5634	1727281	4580241	0.38	0.98	LN5_2E1_MSA	1716	2	0.98	33.34	-	-	-	AGLESGAEPGDGDS(p)DTTK()
IPI00874145	DKC1;SNORA56	K.AGLESGAEPGDGDS#DTTK^.K	0.4	5	N	L	0.96	0.93	0	3.3699	515736	1301185	0.4	0.97	LN5_1E2_LTQ	1896	2	0.98	13.49	-	-	-	AGLESGAEPGDGDS(p)DTTK()
IPI00874145	DKC1;SNORA56	K.AGLESGAEPGDGDS#DTTK^.K	0.42	5	N	L	1	1	0	3.4083	15727821	37857438	0.42	0.99	LN5_1E1_LTQ	2726	2	0.98	20.7	-	-	-	AGLESGAEPGDGDS(p)DTTK()
IPI00874145	DKC1;SNORA56	K.AGLESGAEPGDGDS#DTTK^.K	0.44	5	N	L	0.96	0.91	0	4.0593	440725	1119901	0.39	0.98	LN5_1E2_MSA	1867	2	0.98	11.73	-	-	-	AGLESGAEPGDGDS(p)DTTK()
IPI00874145	DKC1;SNORA56	K.AGLESGAEPGDGDS#DTTK^K^.K	0.892857	0	N	H	0.99	0.98	0	3.846	1326844	1144318	1.16	0.97	HN0_1E1_MSA	3663	2	0.98	29.76	-	-	-	AGLESGAEPGDGDS(p)DTTK()K()
IPI00874145	DKC1;SNORA56	K.AGLESGAEPGDGDS#DTTK^K^.K	1.04167	2	N	H	1	0.99	0	3.8409	962599	1017202	0.95	0.98	HN2_1E1_MSA	4195	2	0.98	13.92	-	-	-	AGLESGAEPGDGDS(p)DTTK()K()
IPI00874145	DKC1;SNORA56	K.AGLESGAEPGDGDS#DTTK^K^.K	1.13636	2	N	H	1	0.99	0	3.2949	3089301	3527125	0.88	0.98	HN2_1E1_LTQ	4348	2	0.98	18.07	-	-	-	AGLESGAEPGDGDS(p)DTTK()K()
IPI00873935	DKC1;SNORA56	K.AGLESGAEPGDGDS#DTTKK.K	1.42	2	N	L	0.99	0.99	0	2.9413	1787070	1222922	1.46	0.99	LN2_1E1_MSA	3935	2	0.98	13.75	-	-	-	AGLESGAEPGDGDS(p)DTTKK
IPI00874145	DKC1;SNORA56	K.AGLESGAEPGDGDS#DTTKK.K	0.763359	3	N	H	0.99	0.98	0	4.1361	2498856	1871678	1.34	0.99	HN3_1E1_MSA	4145	2	0.98	9.9	-	-	-	AGLESGAEPGDGDS(p)DTTKK
IPI00874145	DKC1;SNORA56	K.AGLESGAEPGDGDS#DTTK^K^.K	0.8	3	N	L	0.99	0.99	0	3.9147	1088960	1385591	0.79	0.98	LN3_1E1_MSA	4091	2	0.98	22.51	-	-	-	AGLESGAEPGDGDS(p)DTTK()K()
IPI00874145	DKC1;SNORA56	K.AGLESGAEPGDGDS#DTTKK.K	0.353357	4	N	H	0.99	0.99	0	2.6399	8869009	3214526	2.76	0.96	HN4_1E1_LTQ	4812	2	0.98	4.93	-	-	-	AGLESGAEPGDGDS(p)DTTKK
IPI00874145	DKC1;SNORA56	K.AGLESGAEPGDGDS#DTTKK.K	0.383142	4	N	H	1	0.99	0	3.9872	2400340	933489	2.57	0.99	HN4_1E1_MSA	1154	2	0.98	17.29	-	-	-	AGLESGAEPGDGDS(p)DTTKK
IPI00874145	DKC1;SNORA56	K.AGLESGAEPGDGDS#DTTK^K^.K	0.38	4	N	L	1	0.99	0	3.5336	368963	978330	0.38	0.95	LN4_1E1_MSA	3580	2	0.98	24.63	-	-	-	AGLESGAEPGDGDS(p)DTTK()K()
IPI00874145	DKC1;SNORA56	K.AGLESGAEPGDGDSDTT#K.K	0.4	5	N	L	0.96	0.93	0	2.5417	515736	1301185	0.4	0.97	LN5_1E2_LTQ	1883	2	0.98	5.88	-	-	-	AGLESGAEPGDGDSDTT(p)K
IPI00874145	DKC1;SNORA56	K.S#LPEEDVAEIQHAEEFLIKPESK.V	1.17647	3	N	H	0.93	0.87	0	3.0365	846382	900412	0.94	0.94	HN3_1E1_MSA	11104	3	0.98	62.99	-	-	-	S(p)LPEEDVAEIQHAEEFLIKPESK
IPI00874145	DKC1;SNORA56	K.S#LPEEDVAEIQHAEEFLIK^PESK^.V	0.98	3	N	L	0.85	0.72	8.49099e-12	3.2549	977395	1001749	0.98	0.94	LN3_1E1_MSA	10525	3	0.98	74.06	-	-	-	S(p)LPEEDVAEIQHAEEFLIK()PESK()
IPI00219919	DMAP1	K.DTIIDVVGAPLT#PNSR.K	0.952381	0	N	H	0.94	0.88	0	2.7036	1235150	1066280	1.16	0.96	HN0_1E2_LTQ	6335	2	0.98	15	-	-	-	DTIIDVVGAPLT(p)PNSR
IPI00219919	DMAP1	K.DTIIDVVGAPLT#PNSR@.K	0.909091	0	N	H	0.96	0.91	0	3.2271	1256490	1157495	1.09	0.97	HN0_1E2_MSA	6646	2	0.98	17.32	-	-	-	DTIIDVVGAPLT(p)PNSR()
IPI00219919	DMAP1	K.DTIIDVVGAPLT#PNSR@.K	1.05263	0	N	H	0.91	0.83	0	2.8393	1039787	1082138	0.96	0.92	HN0_1E1_LTQ	8804	2	0.98	7.33	-	-	-	DTIIDVVGAPLT(p)PNSR()
IPI00219919	DMAP1	K.DTIIDVVGAPLT#PNSR.K	1.02041	2	N	H	0.98	0.97	0	2.7247	4497292	4729642	0.95	0.99	HN2_1E1_MSA	9069	2	0.98	25.83	-	-	-	DTIIDVVGAPLT(p)PNSR
IPI00219919	DMAP1	K.DTIIDVVGAPLT#PNSR.K	1.04167	2	N	H	0.98	0.96	0	2.5746	4992828	5372906	0.93	0.98	HN2_1E1_LTQ	10404	2	0.98	11	-	-	-	DTIIDVVGAPLT(p)PNSR
IPI00219919	DMAP1	K.DTIIDVVGAPLT#PNSR@.K	1.02041	2	N	H	0.98	0.97	0	3.0045	4497292	4729642	0.95	0.99	HN2_1E1_MSA	9065	2	0.98	30.36	-	-	-	DTIIDVVGAPLT(p)PNSR()
IPI00219919	DMAP1	K.DTIIDVVGAPLT#PNSR@.K	1.04167	2	N	H	0.98	0.96	0	3.1877	4992828	5372906	0.93	0.98	HN2_1E1_LTQ	10412	2	0.98	30.3	-	-	-	DTIIDVVGAPLT(p)PNSR()
IPI00219919	DMAP1	K.DTIIDVVGAPLT#PNSR.K	1.32	2	N	L	0.97	0.94	0	2.7924	4754505	3772081	1.26	0.96	LN2_1E1_MSA	8860	2	0.98	43.49	-	-	-	DTIIDVVGAPLT(p)PNSR
IPI00219919	DMAP1	K.DTIIDVVGAPLT#PNSR.K	1.37	2	N	L	0.97	0.94	0	3.5124	4590629	3469213	1.32	0.99	LN2_1E1_LTQ	9828	2	0.98	25.35	-	-	-	DTIIDVVGAPLT(p)PNSR
IPI00219919	DMAP1	K.DTIIDVVGAPLT#PNSR@.K	1.32	2	N	L	0.97	0.94	0	2.9515	4754505	3772081	1.26	0.96	LN2_1E1_MSA	8885	2	0.98	25.44	-	-	-	DTIIDVVGAPLT(p)PNSR()
IPI00219919	DMAP1	K.DTIIDVVGAPLT#PNSR@.K	1.37	2	N	L	0.97	0.94	0	2.7713	4590629	3469213	1.32	0.99	LN2_1E1_LTQ	9783	2	0.98	13.65	-	-	-	DTIIDVVGAPLT(p)PNSR()
IPI00219919	DMAP1	K.DTIIDVVGAPLT#PNSR.K	0.543478	3	N	H	0.93	0.86	0	4.2294	2379727	1336729	1.78	0.97	HN3_1E1_MSA	9360	2	0.98	20.15	-	-	-	DTIIDVVGAPLT(p)PNSR
IPI00219919	DMAP1	K.DTIIDVVGAPLT#PNSR.K	0.606061	3	N	H	0.92	0.84	0	2.8082	3120169	1882522	1.66	0.97	HN3_1E1_LTQ	11344	2	0.98	32.17	-	-	-	DTIIDVVGAPLT(p)PNSR
IPI00219919	DMAP1	K.DTIIDVVGAPLT#PNSR.K	0.613497	3	N	H	0.92	0.84	0	4.0232	1457932	785548	1.86	0.97	HN3_1E2_MSA	6411	2	0.98	32.63	-	-	-	DTIIDVVGAPLT(p)PNSR
IPI00219919	DMAP1	K.DTIIDVVGAPLT#PNSR@.K	0.558659	3	N	H	0.96	0.91	0	2.6225	1939505	1069325	1.81	0.99	HN3_1E2_LTQ	7765	2	0.98	7.42	-	-	-	DTIIDVVGAPLT(p)PNSR()
IPI00219919	DMAP1	K.DTIIDVVGAPLT#PNSR@.K	0.613497	3	N	H	0.92	0.84	0	3.0112	1457932	785548	1.86	0.97	HN3_1E2_MSA	6416	2	0.98	26.78	-	-	-	DTIIDVVGAPLT(p)PNSR()
IPI00219919	DMAP1	K.DTIIDVVGAPLT#PNSR.K	0.65	3	N	L	0.95	0.9	0	3.0569	2549963	4067689	0.63	0.97	LN3_1E1_LTQ	10406	2	0.98	4.97	-	-	-	DTIIDVVGAPLT(p)PNSR
IPI00219919	DMAP1	K.DTIIDVVGAPLT#PNSR.K	0.65	3	N	L	0.96	0.92	0	2.9848	1914374	2997618	0.64	0.97	LN3_1E1_MSA	8961	2	0.98	17.66	-	-	-	DTIIDVVGAPLT(p)PNSR
IPI00219919	DMAP1	K.DTIIDVVGAPLT#PNSR@.K	0.65	3	N	L	0.95	0.9	0	3.1066	2549963	4067689	0.63	0.97	LN3_1E1_LTQ	10378	2	0.98	18.98	-	-	-	DTIIDVVGAPLT(p)PNSR()
IPI00219919	DMAP1	K.DTIIDVVGAPLT#PNSR@.K	0.65	3	N	L	0.96	0.92	0	2.5032	1914374	2997618	0.64	0.97	LN3_1E1_MSA	8900	2	0.98	13.81	-	-	-	DTIIDVVGAPLT(p)PNSR()
IPI00219919	DMAP1	K.DTIIDVVGAPLT#PNSR.K	0.2849	4	N	H	0.93	0.86	0	3.5861	3853837	1043200	3.69	0.98	HN4_1E2_MSA	6335	2	0.98	20.48	-	-	-	DTIIDVVGAPLT(p)PNSR
IPI00219919	DMAP1	K.DTIIDVVGAPLT#PNSR.K	0.288184	4	N	H	0.91	0.84	0	3.0408	5536524	1724257	3.21	0.97	HN4_1E1_LTQ	10709	2	0.98	26.28	-	-	-	DTIIDVVGAPLT(p)PNSR
IPI00219919	DMAP1	K.DTIIDVVGAPLT#PNSR.K	0.307692	4	N	H	0.93	0.87	0	4.3	4360079	1243884	3.51	0.98	HN4_1E2_LTQ	7173	2	0.98	31.98	-	-	-	DTIIDVVGAPLT(p)PNSR
IPI00219919	DMAP1	K.DTIIDVVGAPLT#PNSR.K	0.31746	4	N	H	0.87	0.76	0	2.8806	4698775	1520732	3.09	0.99	HN4_1E1_MSA	8444	2	0.98	48.95	-	-	-	DTIIDVVGAPLT(p)PNSR
IPI00219919	DMAP1	K.DTIIDVVGAPLT#PNSR.K	0.27	4	N	L	0.88	0.78	9.19265e-14	2.6308	365875	1253968	0.29	0.9	LN4_1E2_LTQ	7181	2	0.98	25.04	-	-	-	DTIIDVVGAPLT(p)PNSR
IPI00219919	DMAP1	K.DTIIDVVGAPLT#PNSR@.K	0.27	4	N	L	0.88	0.78	9.19265e-14	3.0647	365875	1253968	0.29	0.9	LN4_1E2_LTQ	7190	2	0.98	20.35	-	-	-	DTIIDVVGAPLT(p)PNSR()
IPI00219919	DMAP1	K.DTIIDVVGAPLT#PNSR@.K	0.28	4	N	L	0.88	0.78	0	3.061	363399	1319619	0.28	0.97	LN4_1E2_MSA	6469	2	0.98	34.84	-	-	-	DTIIDVVGAPLT(p)PNSR()
IPI00219919	DMAP1	K.DTIIDVVGAPLT#PNSR.K	0.398406	5	N	H	0.9	0.81	4.62186e-13	3.9901	1789233	720024	2.48	0.97	HN5_1E1_MSA	6650	2	0.98	29.93	-	-	-	DTIIDVVGAPLT(p)PNSR
IPI00219919	DMAP1	K.DTIIDVVGAPLT#PNSR.K	0.403226	5	N	H	0.88	0.77	6.29878e-11	3.6303	1720017	665735	2.58	0.9	HN5_1E2_LTQ	5600	2	0.98	36.29	-	-	-	DTIIDVVGAPLT(p)PNSR
IPI00219919	DMAP1	K.DTIIDVVGAPLT#PNSR.K	0.423729	5	N	H	0.98	0.97	0	3.7503	1585868	738065	2.15	0.68	HN5_1E1_LTQ	7089	2	0.98	40.14	-	-	-	DTIIDVVGAPLT(p)PNSR
IPI00219919	DMAP1	K.DTIIDVVGAPLT#PNSR.K	0.42735	5	N	H	0.93	0.87	3.88578e-15	3.1234	529421	199929	2.65	0.97	HN5_2E1_LTQ	3480	2	0.98	16.23	-	-	-	DTIIDVVGAPLT(p)PNSR
IPI00219919	DMAP1	K.DTIIDVVGAPLT#PNSR.K	0.49505	5	N	H	0.86	0.74	4.77396e-15	2.7709	389814	160196	2.43	0.93	HN5_2E1_MSA	2971	2	0.98	15.93	-	-	-	DTIIDVVGAPLT(p)PNSR
IPI00219919	DMAP1	K.DTIIDVVGAPLT#PNSR.K	0.48	5	N	L	0.89	0.79	1.98307e-11	3.516	313502	757316	0.41	0.91	LN5_1E1_MSA	6584	2	0.98	5.94	-	-	-	DTIIDVVGAPLT(p)PNSR
IPI00219919	DMAP1	K.DTIIDVVGAPLT#PNSR@.K	0.35	5	N	L	0.73	0.53	5.05213e-08	2.6708	75016	171957	0.44	0.9	LN5_2E1_LTQ	3910	2	0.98	4.33	-	-	-	DTIIDVVGAPLT(p)PNSR()
IPI00219919	DMAP1	K.DTIIDVVGAPLT#PNSR@.K	0.37	5	N	L	0.66	0.43	2.17305e-05	2.5113	71665	154492	0.46	0.95	LN5_2E1_MSA	3273	2	0.98	14.89	-	-	-	DTIIDVVGAPLT(p)PNSR()
IPI00219919	DMAP1	K.DTIIDVVGAPLT#PNSR@.K	0.44	5	N	L	0.95	0.9	0	2.7131	385261	955567	0.4	0.95	LN5_1E1_LTQ	7287	2	0.98	25.35	-	-	-	DTIIDVVGAPLT(p)PNSR()
IPI00219919	DMAP1	K.DTIIDVVGAPLT#PNSR@.K	0.48	5	N	L	0.89	0.79	1.98307e-11	3.099	313502	757316	0.41	0.91	LN5_1E1_MSA	6568	2	0.98	20.33	-	-	-	DTIIDVVGAPLT(p)PNSR()
IPI00219919	DMAP1	K.DTIIDVVGAPLT#PNSR@.K	0.5	5	N	L	0.8	0.64	2.39931e-09	2.7089	187317	378851	0.49	0.92	LN5_1E2_LTQ	5024	2	0.98	22.18	-	-	-	DTIIDVVGAPLT(p)PNSR()
IPI00956271	DMXL2	A.M*QDHSTFKS#NM*LAR.K	1.04	3	N	L	0.23	0.05	0.105745	2.5126	221300	48687	4.55	0.92	LN3_1E4_LTQ	2886	2	0.98	22.96	-	-	-	M()QDHSTFKS(p)NM()LAR
IPI00154975	DNAJC9	K.KIS#LEDIQAFEK.T	1.0101	2	N	H	0.88	0.77	9.9698e-13	3.3559	2103019	1268535	1.66	0.94	HN2_1E1_MSA	8962	2	0.98	0	-	-	-	KIS(p)LEDIQAFEK
IPI00154975	DNAJC9	K.KIS#LEDIQAFEK.T	1.45	2	N	L	0.95	0.91	0	2.5378	1851314	834647	2.22	0.97	LN2_1E1_MSA	8797	2	0.98	0	-	-	-	KIS(p)LEDIQAFEK
IPI00154975	DNAJC9	K.K^IS#LEDIQAFEK^.T	1.19048	3	N	H	0.94	0.89	0	2.6708	2289762	1901594	1.2	0.96	HN3_1E1_LTQ	11250	2	0.98	0	-	-	-	K()IS(p)LEDIQAFEK()
IPI00154975	DNAJC9	K.KIS#LEDIQAFEK.T	1.19048	3	N	H	0.94	0.89	0	2.942	2289762	1901594	1.2	0.96	HN3_1E1_LTQ	11261	2	0.98	0	-	-	-	KIS(p)LEDIQAFEK
IPI00154975	DNAJC9	K.KIS#LEDIQAFEK.T	1.21951	3	N	H	0.9	0.82	2.55351e-15	2.9018	1424615	1327167	1.07	0.95	HN3_1E1_MSA	9203	2	0.98	0	-	-	-	KIS(p)LEDIQAFEK
IPI00154975	DNAJC9	K.K^IS#LEDIQAFEK^.T	1.34	3	N	L	0.93	0.87	0	2.9377	2714190	1453732	1.87	0.95	LN3_1E1_LTQ	10310	2	0.98	0	-	-	-	K()IS(p)LEDIQAFEK()
IPI00154975	DNAJC9	K.KIS#LEDIQAFEK.T	1.34	3	N	L	0.93	0.87	0	2.8734	2714190	1453732	1.87	0.95	LN3_1E1_LTQ	10320	2	0.98	0	-	-	-	KIS(p)LEDIQAFEK
IPI00154975	DNAJC9	K.KIS#LEDIQAFEK.T	1.36	3	N	L	0.94	0.89	0	3.0753	1999815	1019863	1.96	0.98	LN3_1E1_MSA	8861	2	0.98	0	-	-	-	KIS(p)LEDIQAFEK
IPI00154975	DNAJC9	K.KIS#LEDIQAFEK.T	0.377358	4	N	H	0.96	0.92	0	2.7136	4208924	1397818	3.01	0.96	HN4_1E1_LTQ	10555	2	0.98	0	-	-	-	KIS(p)LEDIQAFEK
IPI00154975	DNAJC9	K.KIS#LEDIQAFEK.T	0.452489	4	N	H	0.91	0.84	0	3.3835	3391776	1183151	2.87	0.97	HN4_1E1_MSA	8339	2	0.98	0	-	-	-	KIS(p)LEDIQAFEK
IPI00154975	DNAJC9	K.KIS#LEDIQAFEK.T	0.512821	4	N	H	0.72	0.52	2.36252e-06	2.8895	771398	247641	3.11	0.9	HN4_1E2_MSA	6213	2	0.98	0	-	-	-	KIS(p)LEDIQAFEK
IPI00220919	DNMT1	K.EADDDEEVDDNIPEM*PS#PK.K	1.25	2	N	L	0.97	0.94	0	2.6498	2569840	2253437	1.14	0.98	LN2_1E1_LTQ	6344	2	0.98	0	-	-	-	EADDDEEVDDNIPEM()PS(p)PK
IPI00220919	DNMT1	K.EADDDEEVDDNIPEM*PS#PK.K	0.609756	3	N	H	0.99	0.98	0	3.1601	2804883	1856408	1.51	1	HN3_1E1_MSA	6018	2	0.98	0	-	-	-	EADDDEEVDDNIPEM()PS(p)PK
IPI00220919	DNMT1	K.EADDDEEVDDNIPEM*PS#PK^.K	0.38	4	N	L	0.99	0.97	0	2.674	681443	1764533	0.39	0.99	LN4_1E1_MSA	5405	2	0.98	0	-	-	-	EADDDEEVDDNIPEM()PS(p)PK()
IPI00220919	DNMT1	K.EADDDEEVDDNIPEM*PS#PK.K	0.787402	5	N	H	0.99	0.98	0	3.2682	6591240	5206959	1.27	0.98	HN5_1E1_MSA	4140	2	0.98	0	-	-	-	EADDDEEVDDNIPEM()PS(p)PK
IPI00220918	DNMT1	K.EADDDEEVDDNIPEM*PS#PK.K	0.793651	5	N	H	0.98	0.96	0	3.1527	6689872	5248248	1.27	0.98	HN5_1E1_LTQ	4554	2	0.98	0	-	-	-	EADDDEEVDDNIPEM()PS(p)PK
IPI00220919	DNMT1	K.EADDDEEVDDNIPEM*PS#PK.K	0.92	5	N	L	0.99	0.98	0	2.6114	6706122	7350383	0.91	0.98	LN5_1E1_LTQ	4495	2	0.98	0	-	-	-	EADDDEEVDDNIPEM()PS(p)PK
IPI00220919	DNMT1	K.EADDDEEVDDNIPEM*PS#PK.K	0.94	5	N	L	1	0.99	0	3.1543	6947529	7377358	0.94	0.99	LN5_1E1_MSA	4150	2	0.98	0	-	-	-	EADDDEEVDDNIPEM()PS(p)PK
IPI00220919	DNMT1	K.EADDDEEVDDNIPEM*PS#PK^.K	0.94	5	N	L	1	0.99	0	3.3144	6947529	7377358	0.94	0.99	LN5_1E1_MSA	4167	2	0.98	0	-	-	-	EADDDEEVDDNIPEM()PS(p)PK()
IPI00220919	DNMT1	K.EADDDEEVDDNIPEMPS#PK^.K	0.877193	0	N	H	0.97	0.94	0	2.738	3864914	3171568	1.22	0.98	HN0_1E1_MSA	6473	2	0.98	0	-	-	-	EADDDEEVDDNIPEMPS(p)PK()
IPI00220919	DNMT1	K.EADDDEEVDDNIPEMPS#PK.K	0.952381	2	N	H	0.99	0.99	0	2.5258	14278456	13955105	1.02	0.99	HN2_1E1_LTQ	8669	2	0.98	0	-	-	-	EADDDEEVDDNIPEMPS(p)PK
IPI00220919	DNMT1	K.EADDDEEVDDNIPEMPS#PK.K	0.952381	2	N	H	0.99	0.99	0	2.9985	11218038	10802968	1.04	1	HN2_1E1_MSA	7567	2	0.98	0	-	-	-	EADDDEEVDDNIPEMPS(p)PK
IPI00031519	DNMT1	K.EADDDEEVDDNIPEMPS#PK.K	0.952381	2	N	H	0.99	0.99	0	2.5271	11218038	10802968	1.04	1	HN2_1E1_MSA	7671	2	0.98	0	-	-	-	EADDDEEVDDNIPEMPS(p)PK
IPI00220919	DNMT1	K.EADDDEEVDDNIPEMPS#PK^.K	0.952381	2	N	H	0.99	0.99	0	3.1632	14278456	13955105	1.02	0.99	HN2_1E1_LTQ	8733	2	0.98	0	-	-	-	EADDDEEVDDNIPEMPS(p)PK()
IPI00031519	DNMT1	K.EADDDEEVDDNIPEMPS#PK^.K	0.952381	2	N	H	0.99	0.99	0	3.1791	11218038	10802968	1.04	1	HN2_1E1_MSA	7656	2	0.98	0	-	-	-	EADDDEEVDDNIPEMPS(p)PK()
IPI00220919	DNMT1	K.EADDDEEVDDNIPEMPS#PK^.K	0.952381	2	N	H	0.99	0.99	0	3.1791	11218038	10802968	1.04	1	HN2_1E1_MSA	7656	2	0.98	0	-	-	-	EADDDEEVDDNIPEMPS(p)PK()
IPI00220919	DNMT1	K.EADDDEEVDDNIPEMPS#PK.K	1.38	2	N	L	0.99	0.99	0	3.2529	10980766	8333467	1.32	0.99	LN2_1E1_LTQ	8162	2	0.98	0	-	-	-	EADDDEEVDDNIPEMPS(p)PK
IPI00220918	DNMT1	K.EADDDEEVDDNIPEMPS#PK.K	1.39	2	N	L	0.99	0.98	0	3.199	6743885	5089234	1.33	0.99	LN2_1E1_MSA	7396	2	0.98	0	-	-	-	EADDDEEVDDNIPEMPS(p)PK
IPI00220919	DNMT1	K.EADDDEEVDDNIPEMPS#PK^.K	1.38	2	N	L	0.99	0.99	0	2.7724	10980766	8333467	1.32	0.99	LN2_1E1_LTQ	8201	2	0.98	0	-	-	-	EADDDEEVDDNIPEMPS(p)PK()
IPI00220918	DNMT1	K.EADDDEEVDDNIPEMPS#PK^.K	1.39	2	N	L	0.99	0.98	0	3.4663	6743885	5089234	1.33	0.99	LN2_1E1_MSA	7390	2	0.98	0	-	-	-	EADDDEEVDDNIPEMPS(p)PK()
IPI00220918	DNMT1	K.EADDDEEVDDNIPEMPS#PK.K	0.546448	3	N	H	0.98	0.97	0	3.4545	15396494	8664331	1.78	0.99	HN3_1E1_LTQ	9503	2	0.98	0	-	-	-	EADDDEEVDDNIPEMPS(p)PK
IPI00220919	DNMT1	K.EADDDEEVDDNIPEMPS#PK.K	0.549451	3	N	H	0.99	0.99	0	3.9281	13382793	7636524	1.75	0.98	HN3_1E1_MSA	7704	2	0.98	0	-	-	-	EADDDEEVDDNIPEMPS(p)PK
IPI00031519	DNMT1	K.EADDDEEVDDNIPEMPS#PK.K	0.549451	3	N	H	0.99	0.99	0	3.7753	13382793	7636524	1.75	0.98	HN3_1E1_MSA	7758	2	0.98	0	-	-	-	EADDDEEVDDNIPEMPS(p)PK
IPI00031519	DNMT1	K.EADDDEEVDDNIPEMPS#PK^.K	0.549451	3	N	H	0.99	0.99	0	3.5728	13382793	7636524	1.75	0.98	HN3_1E1_MSA	7700	2	0.98	0	-	-	-	EADDDEEVDDNIPEMPS(p)PK()
IPI00220919	DNMT1	K.EADDDEEVDDNIPEMPS#PK^.K	0.549451	3	N	H	0.99	0.99	0	3.5728	13382793	7636524	1.75	0.98	HN3_1E1_MSA	7700	2	0.98	0	-	-	-	EADDDEEVDDNIPEMPS(p)PK()
IPI00220918	DNMT1	K.EADDDEEVDDNIPEMPS#PK.K	0.75	3	N	L	0.99	0.97	0	3.2666	7260456	9650780	0.75	0.98	LN3_1E1_LTQ	8673	2	0.98	0	-	-	-	EADDDEEVDDNIPEMPS(p)PK
IPI00220918	DNMT1	K.EADDDEEVDDNIPEMPS#PK^.K	0.75	3	N	L	0.99	0.97	0	3.1775	7260456	9650780	0.75	0.98	LN3_1E1_LTQ	8689	2	0.98	0	-	-	-	EADDDEEVDDNIPEMPS(p)PK()
IPI00220919	DNMT1	K.EADDDEEVDDNIPEMPS#PK^.K	0.78	3	N	L	0.99	0.98	0	3.2065	4815877	6422988	0.75	0.99	LN3_1E1_MSA	7477	2	0.98	0	-	-	-	EADDDEEVDDNIPEMPS(p)PK()
IPI00220918	DNMT1	K.EADDDEEVDDNIPEMPS#PK.K	0.306748	4	N	H	0.99	0.99	0	3.3223	38678832	12718609	3.04	1	HN4_1E1_LTQ	8909	2	0.98	0	-	-	-	EADDDEEVDDNIPEMPS(p)PK
IPI00220918	DNMT1	K.EADDDEEVDDNIPEMPS#PK.K	0.307692	4	N	H	0.99	0.98	0	4.2128	20437168	6761012	3.02	1	HN4_1E1_MSA	6977	2	0.98	0	-	-	-	EADDDEEVDDNIPEMPS(p)PK
IPI00220919	DNMT1	K.EADDDEEVDDNIPEMPS#PK^.K	0.4	4	N	L	0.99	0.97	0	3.1732	2445220	5815637	0.42	0.99	LN4_1E1_MSA	6856	2	0.98	0	-	-	-	EADDDEEVDDNIPEMPS(p)PK()
IPI00220918	DNMT1	K.EADDDEEVDDNIPEMPS#PK^.K	0.43	4	N	L	0.99	0.98	0	2.7852	3193289	7385927	0.43	0.99	LN4_1E1_LTQ	8054	2	0.98	0	-	-	-	EADDDEEVDDNIPEMPS(p)PK()
IPI00031519	DNMT1	K.EADDDEEVDDNIPEMPS#PK.K	0.675676	5	N	H	0.99	0.98	0	2.6917	10920927	7896347	1.38	0.99	HN5_1E1_MSA	5518	2	0.98	0	-	-	-	EADDDEEVDDNIPEMPS(p)PK
IPI00220919	DNMT1	K.EADDDEEVDDNIPEMPS#PK.K	0.675676	5	N	H	0.99	0.98	0	3.211	10920927	7896347	1.38	0.99	HN5_1E1_MSA	5559	2	0.98	0	-	-	-	EADDDEEVDDNIPEMPS(p)PK
[truncated: 9,304 more rows]
